# Supplementary material for: Turning Nonselective Inhibitors of Type I Protein Arginine Methyltransferases into Potent and Selective Inhibitors of Protein Arginine Methyltransferase 4 through a Deconstruction–Reconstruction and Fragment-Growing Approach
Source: PubMed Central journal article supplement (PMC9469100; doi:10.1021/acs.jmedchem.2c00252), 2022-04-28
Supplement: jm2c00252_si_001.pdf [file jm2c00252_si_001.pdf]

## Supporting Information

### **Turning Non-Selective Inhibitors of Type I Protein Arginine Methyltransferases into Potent and Selective Inhibitors of Protein Arginine Methyltransferase 4 through a Deconstruction-Reconstruction and Fragment Growing Approach**

*Giulia Iannelli,<sup>‡,§,||</sup> Ciro Milite,<sup>‡,||</sup> Nils Marechal,<sup>§</sup> Vincent Cura,<sup>§</sup> Luc Bonnefond,<sup>§</sup> Nathalie-Troffer-Charlier,<sup>§</sup> Alessandra Feoli,<sup>‡</sup> Donatella Rescigno,<sup>‡,†</sup> Yalong Wang,<sup>Δ</sup> Alessandra Cipriano,<sup>‡</sup> Monica Viviano,<sup>‡</sup> Mark T. Bedford,<sup>Δ</sup> Jean Cavarelli,<sup>\*,§</sup> Sabrina Castellano,<sup>\*,‡</sup> and Gianluca Sbardella<sup>\*,‡</sup>*

<sup>‡</sup>Department of Pharmacy, Epigenetic Med Chem Lab, University of Salerno, via Giovanni Paolo II 132, I-84084 Fisciano (SA), Italy

<sup>§</sup> Department of Integrated Structural Biology, Institut de Génétique et de Biologie Moléculaire et Cellulaire, Illkirch, France; Centre National de la Recherche Scientifique, UMR7104, Illkirch, France; Institut National de la Santé et de la Recherche Médicale, U1258, Illkirch, France; Université de Strasbourg, Illkirch, France.

<sup>||</sup>PhD Program in Drug Discovery and Development, University of Salerno, Via Giovanni Paolo II 132, I-84084 Fisciano (SA), Italy

<sup>Δ</sup> Department of Epigenetics and Molecular Carcinogenesis, The University of Texas MD Anderson Cancer Center, Houston, Texas 77030, United States

\*J.C.: E-mail, cava@igbmc.fr; \*S.C.: E-mail, scastellano@unisa.it; \*G.S.: E-mail, gsbardella@unisa.it

#### **Table of Contents:**

|                                                                                                        |         |
|--------------------------------------------------------------------------------------------------------|---------|
| Figure S1: SPR interaction analysis of compounds <b>12b–e</b>                                          | S2      |
| Figure S2: Inhibitory activity profiles of compound <b>12h</b> towards a panel of KMTs                 | S3      |
| Table S1. Inhibitory activity values of compound <b>12h</b> against a panel of KMTs                    | S3      |
| Figure S3: overview of Tetramer of <i>mm</i> PRMT4 with compound <b>12h</b> (EML981) bound             | S4      |
| Figure S4: superimposition of compound <b>12h</b> on a transition state mimic- <i>mm</i> PRMT4         | S5      |
| Figures S5–S7: protein-ligand interactions between <b>12a–c</b> and PRMT4 residues                     | S6–S8   |
| Figure S8–S10: protein-ligand interactions between <b>12f–h</b> and PRMT4 residues                     | S9–S11  |
| Figure S11: superimposition of compounds <b>12a</b> , <b>12c</b> , <b>12f</b> bound to <i>mm</i> PRMT6 | S12     |
| Figure S12: Conformational changes of PRMT6 alpha-X helix containing the motif I                       | S12     |
| Table S2. Permeability values of compounds <b>12f–h</b>                                                | S13     |
| <sup>1</sup> H-NMR and <sup>13</sup> C-NMR spectra of compound <b>5–12</b>                             | S14–S81 |
| HPLC Traces for compounds <b>12a–h</b>                                                                 | S82–S89 |

**Figure S1.** SPR interaction analysis of compounds **12b–e** binding to immobilized PRMT4.

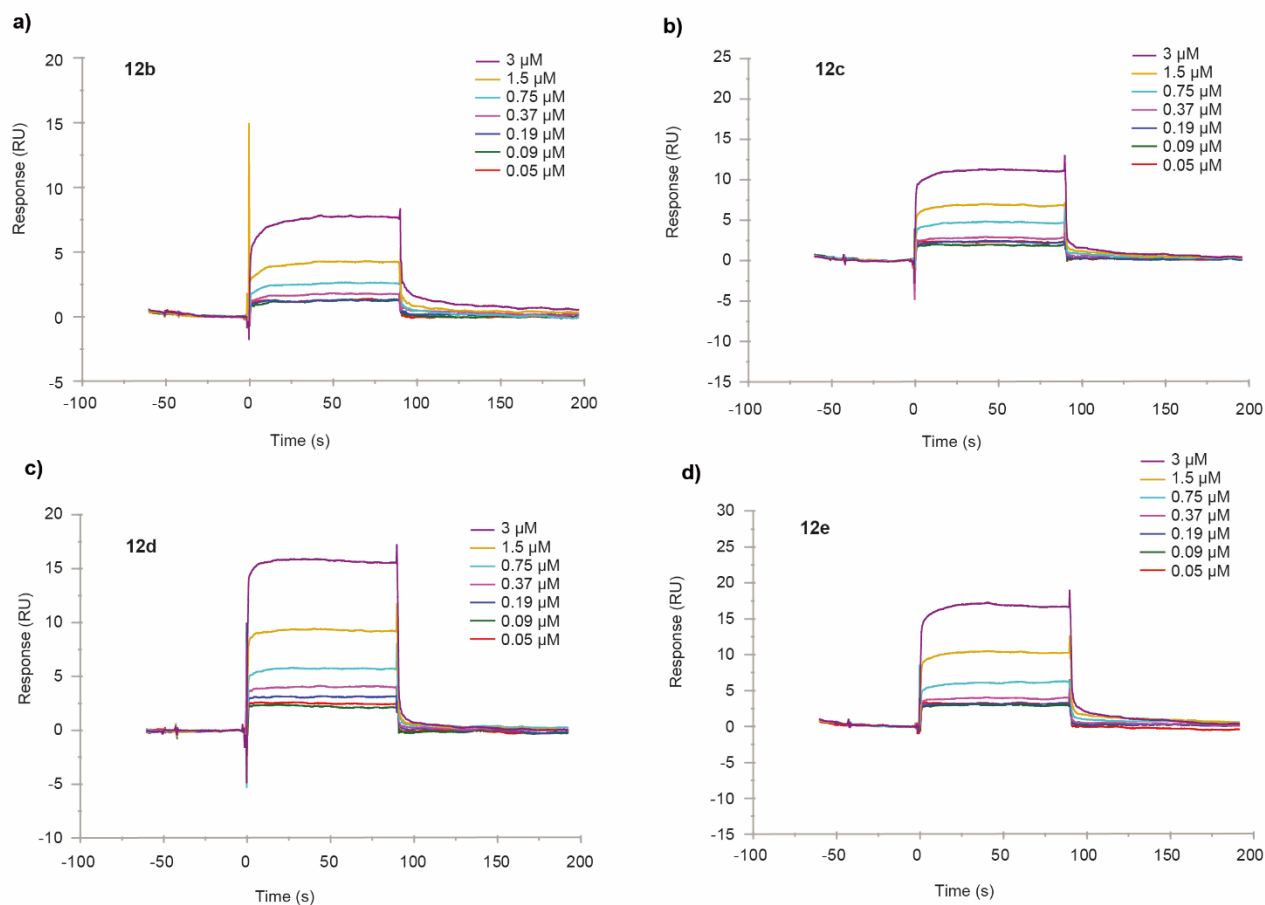

Sensorgrams obtained from the SPR interaction analysis of compounds **12b–e** (panels a–d, respectively) binding to immobilized PRMT4. Each compound was injected at different concentrations (from 3  $\mu\text{M}$  to 0.05  $\mu\text{M}$ ) with an association and a dissociation time of 90 sec, with a flow rate of 30  $\mu\text{L}/\text{min}$ . The equilibrium dissociation constants ( $K_D$ ) were derived from the ratio between kinetic dissociation ( $k_{\text{off}}$ ) and association ( $k_{\text{on}}$ ) constants.

**Figure S2**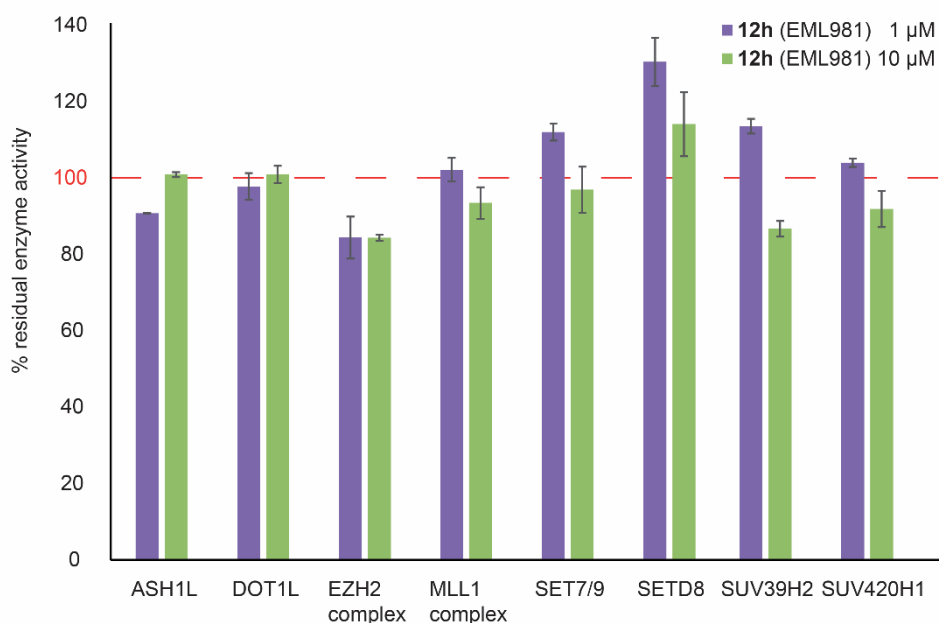

Inhibitory activity profiles of compound 12h towards ASH1L, DOT1L, EZH2, MLL1, SET7/9, SETD8, SUV39H2, and SUV420H1 at two different fixed concentrations (1 and 10  $\mu\text{M}$ ).

**Table S1.** Inhibitory activity values of compound 12h against a panel of KMTs

|                 | % enzyme residual activ. after treatment with 12h <sup>a,b</sup> |                  | ref. compd. IC <sub>50</sub> ( $\mu\text{M}$ ) <sup>b,c</sup> |       |       |
|-----------------|------------------------------------------------------------------|------------------|---------------------------------------------------------------|-------|-------|
|                 | 1 $\mu\text{M}$                                                  | 10 $\mu\text{M}$ | SAH                                                           | chaet | ryuv  |
| <b>ASH1L</b>    | 90.76±0.13                                                       | 90.76±0.13       | -                                                             | 0.14  | -     |
| <b>DOT1L</b>    | 97.74±3.48                                                       | 90.76±0.13       | 0.174                                                         | -     | -     |
| <b>EZH2</b>     | 84.39±5.51                                                       | 90.76±0.13       | 18.8                                                          | -     | -     |
| <b>G9a</b>      | 101.54±1.67                                                      | 90.76±0.13       | 1.19                                                          | -     | -     |
| <b>MLL1</b>     | 102.15±3.11                                                      | 90.76±0.13       | 0.464                                                         | -     | -     |
| <b>SET7/9</b>   | 112.02±2.25                                                      | 90.76±0.13       | 139                                                           | -     | -     |
| <b>SETD8</b>    | 130.39±6.36                                                      | 90.76±0.13       | -                                                             | -     | 0.186 |
| <b>SMYD3</b>    | 72.83±0.68                                                       | 90.76±0.13       | 18.7                                                          | -     | -     |
| <b>SUV39H2</b>  | 113.51±1.92                                                      | 90.76±0.13       | 32.7                                                          | -     | -     |
| <b>SUV420H1</b> | 104.00±1.13                                                      | 90.76±0.13       | 46.5                                                          | -     | -     |

<sup>a</sup>Compounds were tested at 1 and 10  $\mu\text{M}$  fixed concentrations; values obtained for each compound are mean  $\pm$  SD determined for two separate experiments in duplicate; <sup>b</sup>values were obtained in a radioisotope-based filter assay, using 0.05 mg/mL oligo nucleosomes (for ASH1L, MLL1 complex, SETD8, SUV420H1 and DOT1L), 0.05 mg/mL core histone (for EZH2 complex and SET7/9), or 5  $\mu\text{M}$  histone H3 (for SUV39H2) as substrate and *S*-adenosyl-L-[methyl-<sup>3</sup>H]methionine (1  $\mu\text{M}$ ) as methyl donor; <sup>c</sup>reference compounds were tested in 10-dose IC<sub>50</sub> mode with 3-fold serial dilution starting at 100  $\mu\text{M}$ ; data were analyzed using Excel and GraphPad Prism 6.0 software (GraphPad Software Inc., San Diego, CA) for IC<sub>50</sub> curve fits using sigmoidal dose vs. response - variable slope (four parameters) equations.

Figure S3.

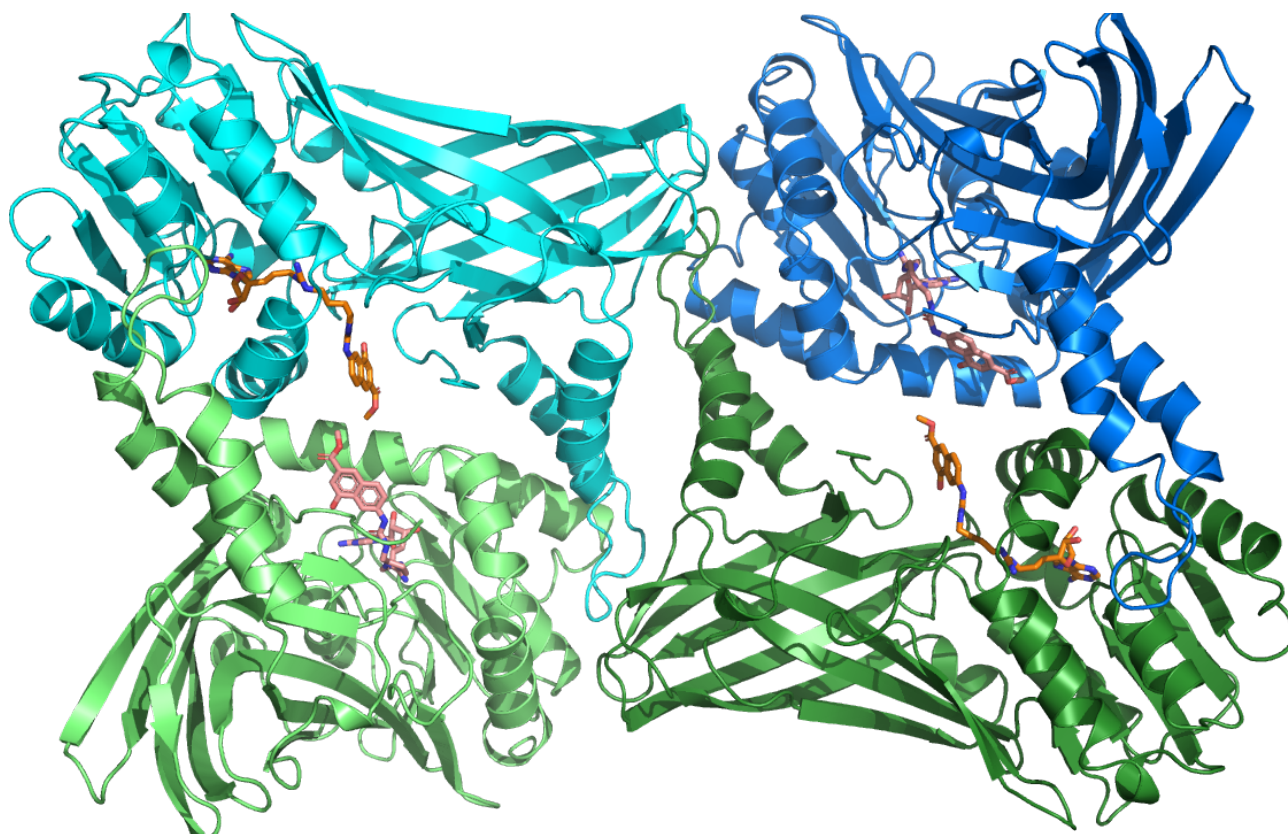

An overview of Tetramer of *mm*PRMT4 with compound **12h** (EML981) bound (PDB ID 7PUC). PRMT4 monomers within tetramer (dodger blue, cyan, light green, sea green) are represented as a cartoon. Compound **12h** (EML981) is represented as orange sticks. PRMT4 crystallized in the space group  $P2_12_12$  which contains one copy of the PRMT4 tetramer in the asymmetric unit.



Figure S4.

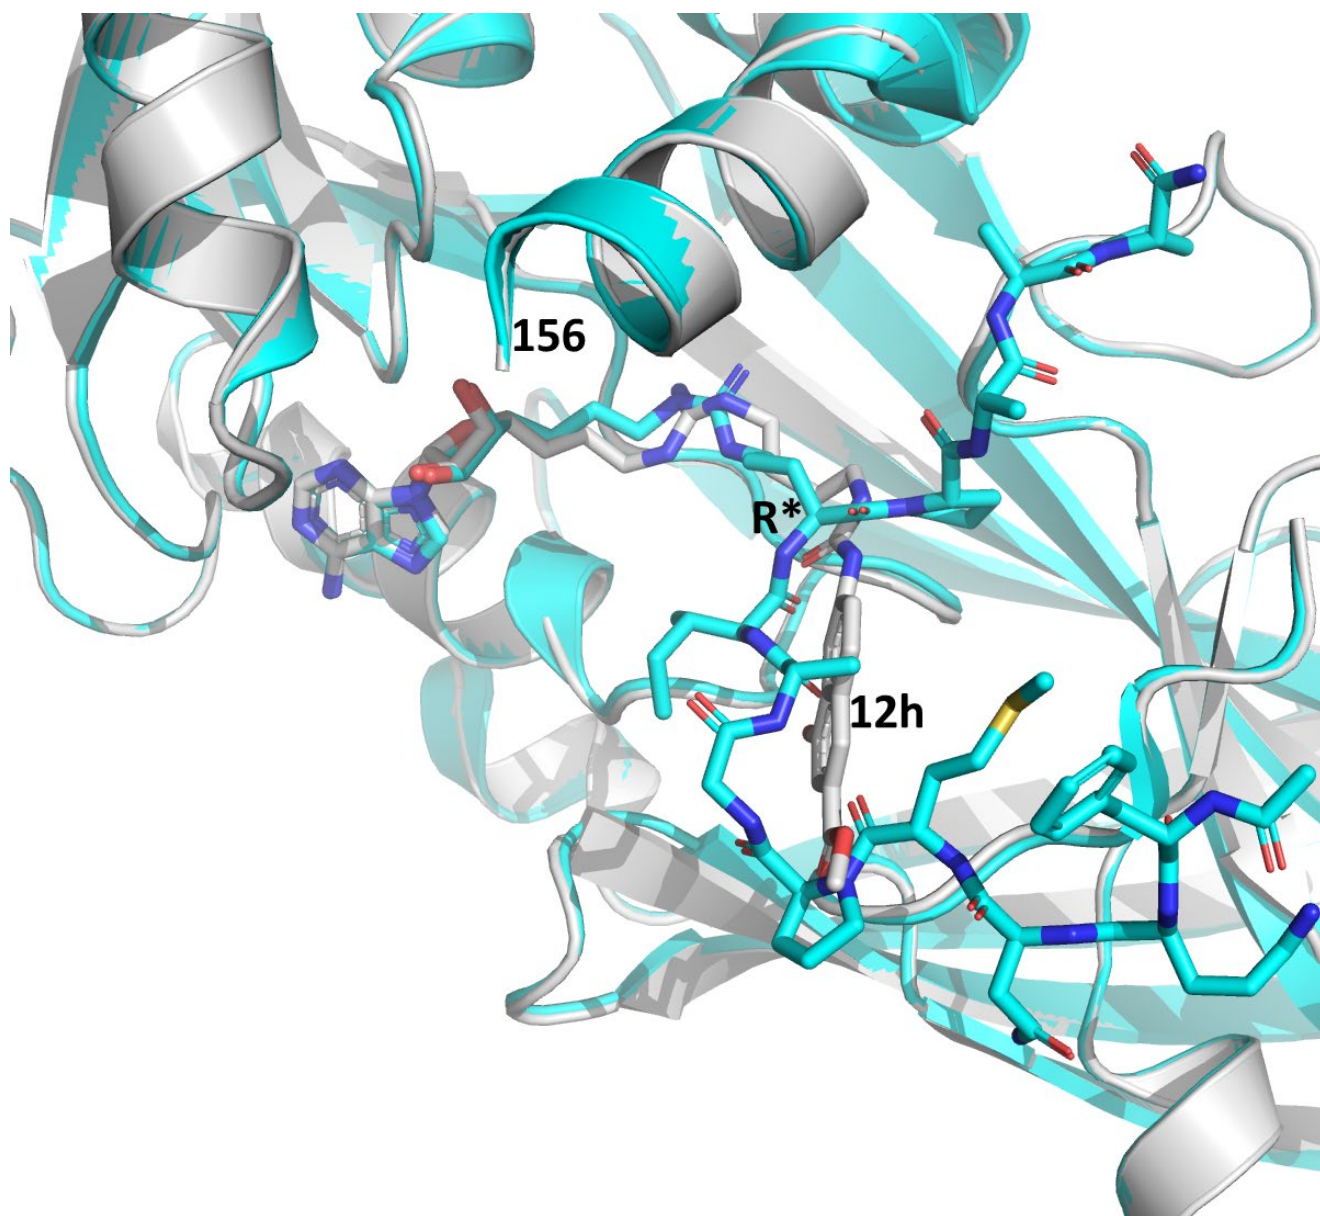

Superimposition of compound **12h** (grey sticks) bound to *mmPRMT4* (represented as grey cartoon, PDB ID 7PUC) with a transition state mimic (cyan sticks) bound to *mmPRMT4* (cyan cartoon, PDB ID 5LGP). R\* represent the mimic of the arginine to be methylated. Superimposition is done on protein backbones. For clarity, the N-terminal helices of *mmCARM1* are not shown.

Figure S5.

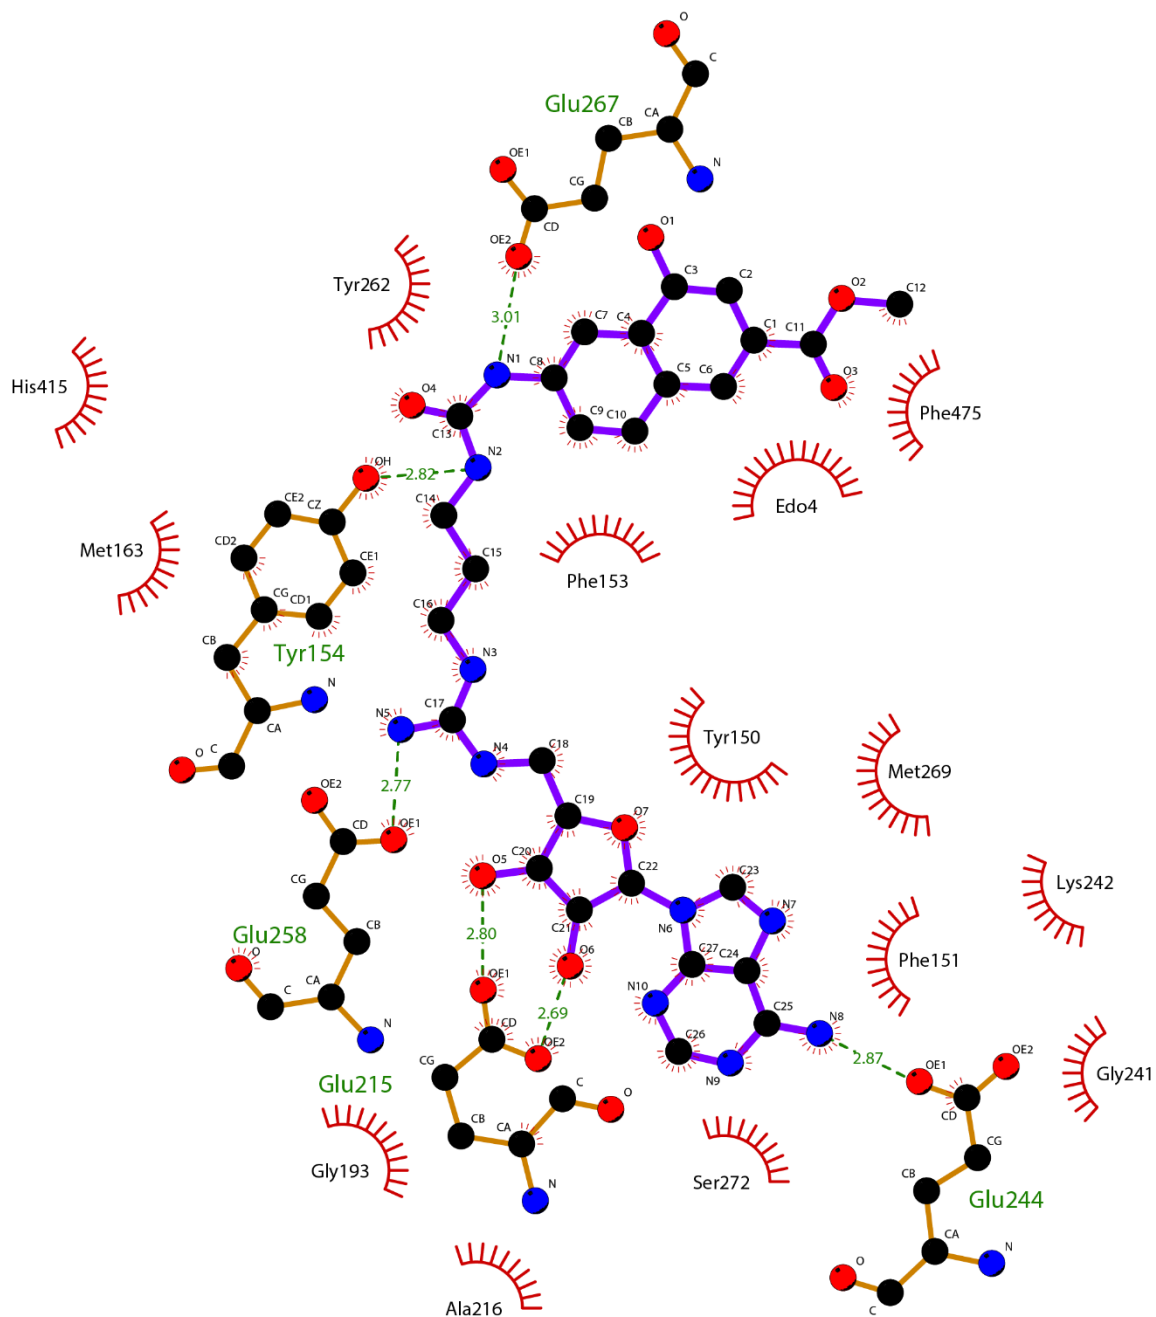

Flat representation done with LigPlot+ showing contacts between compound **12a** (EML734) and active site residues in PRMT4 (subunit B). Hydrogen bonds are shown as dotted lines. The spoked arcs represent protein residues making non-bonded (hydrophobic) contacts with compounds.

Figure S6.

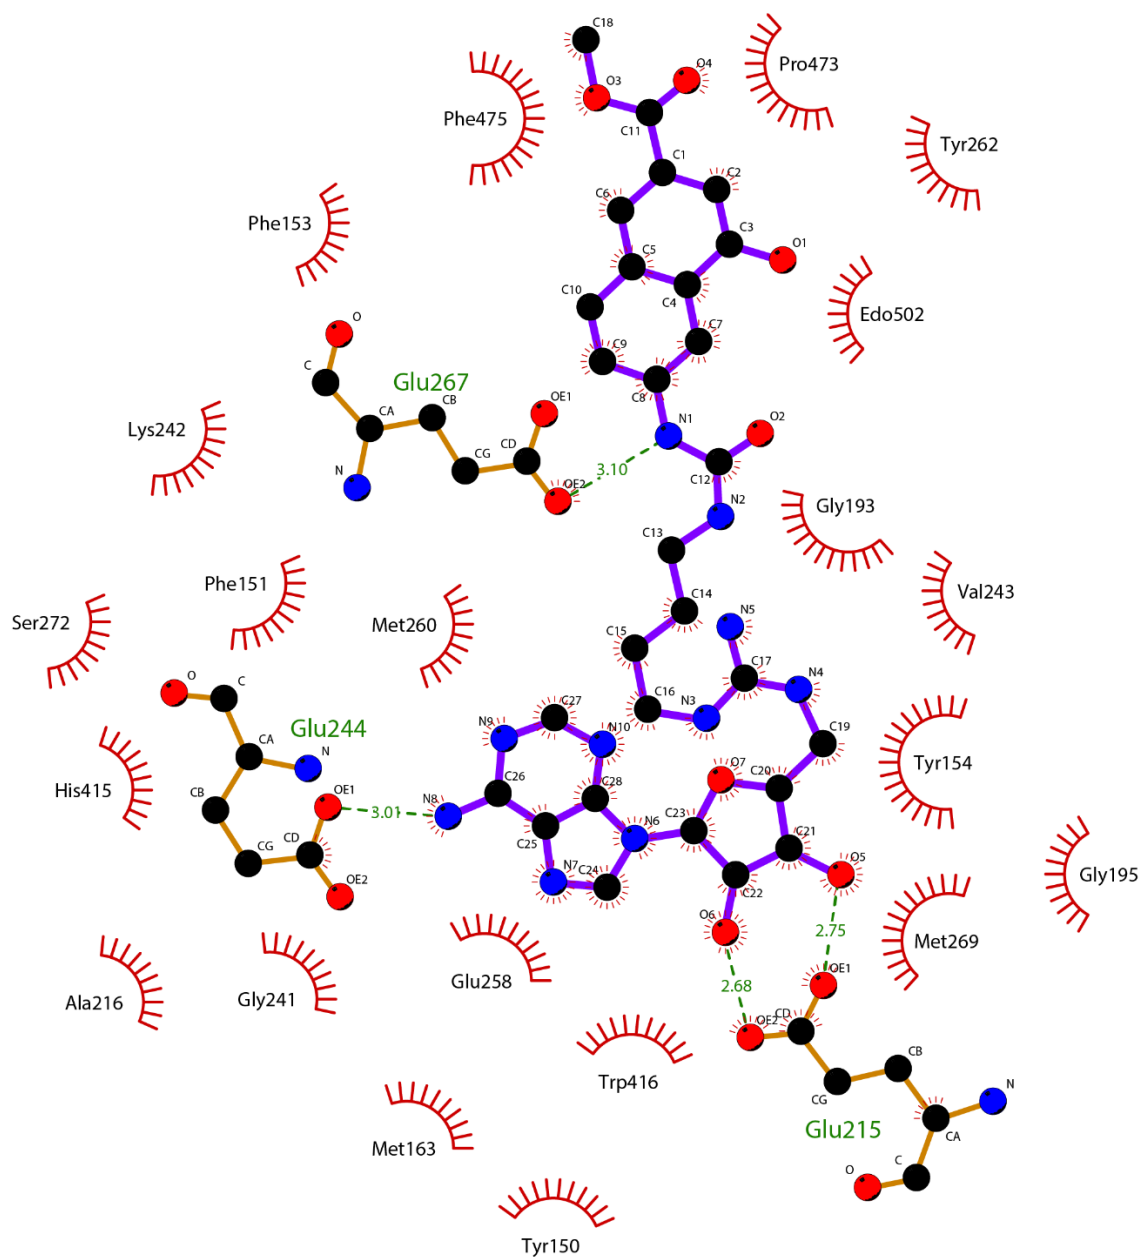

Flat representation done with LigPlot+ showing contacts between compound **12b** (EML709) and active site residues in PRMT4 (subunit B). Hydrogen bonds are shown as dotted lines. The spoked arcs represent protein residues making non-bonded (hydrophobic) contacts with compounds.

Figure S7.

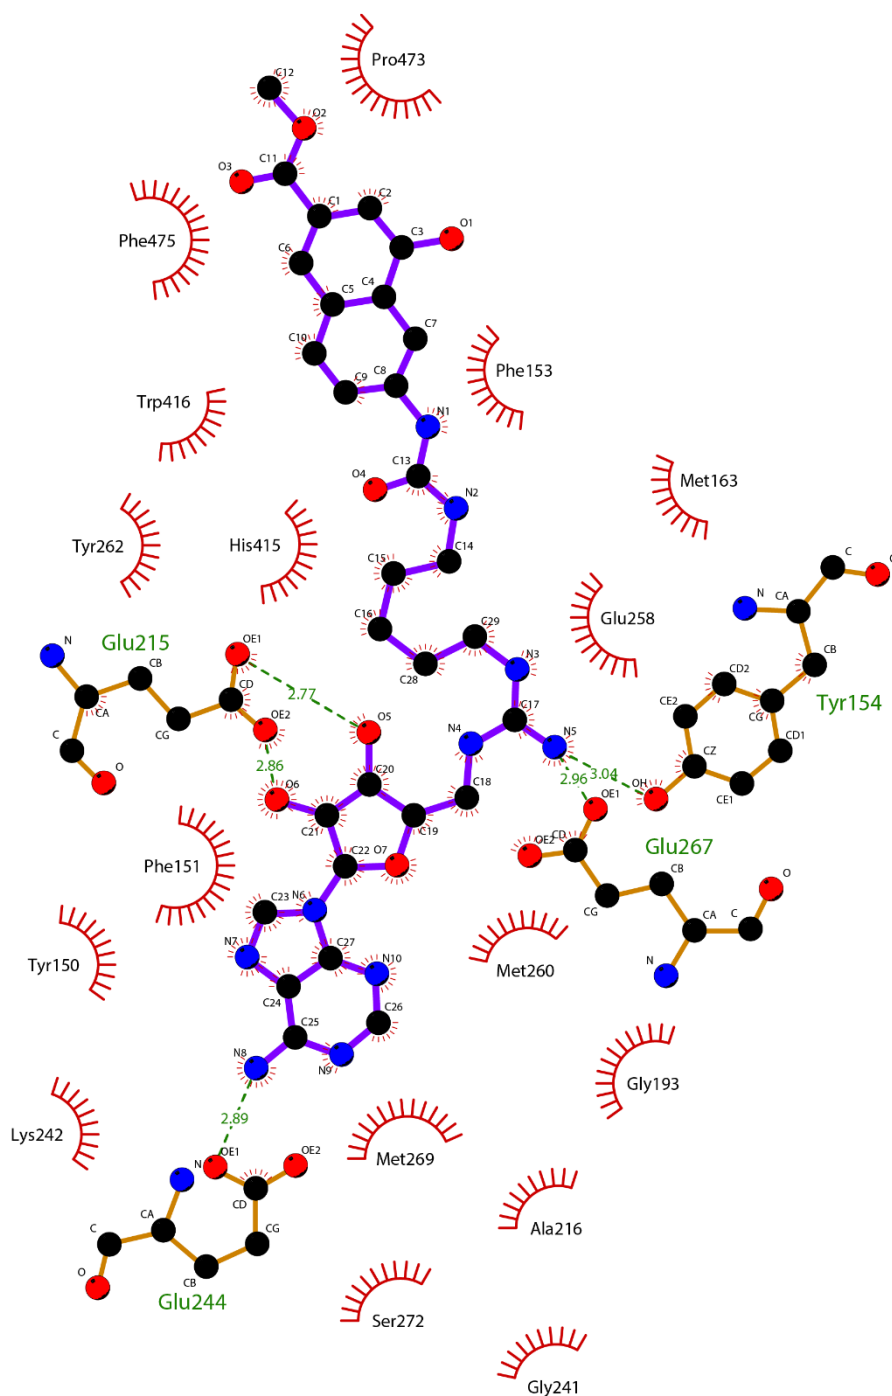

Flat representation done with LigPlot+ showing contacts between compound **12c** (EML736) and active site residues in PRMT4 (subunit B). Hydrogen bonds are shown as dotted lines. The spoked arcs represent protein residues making non-bonded (hydrophobic) contacts with compounds.

Figure S8.

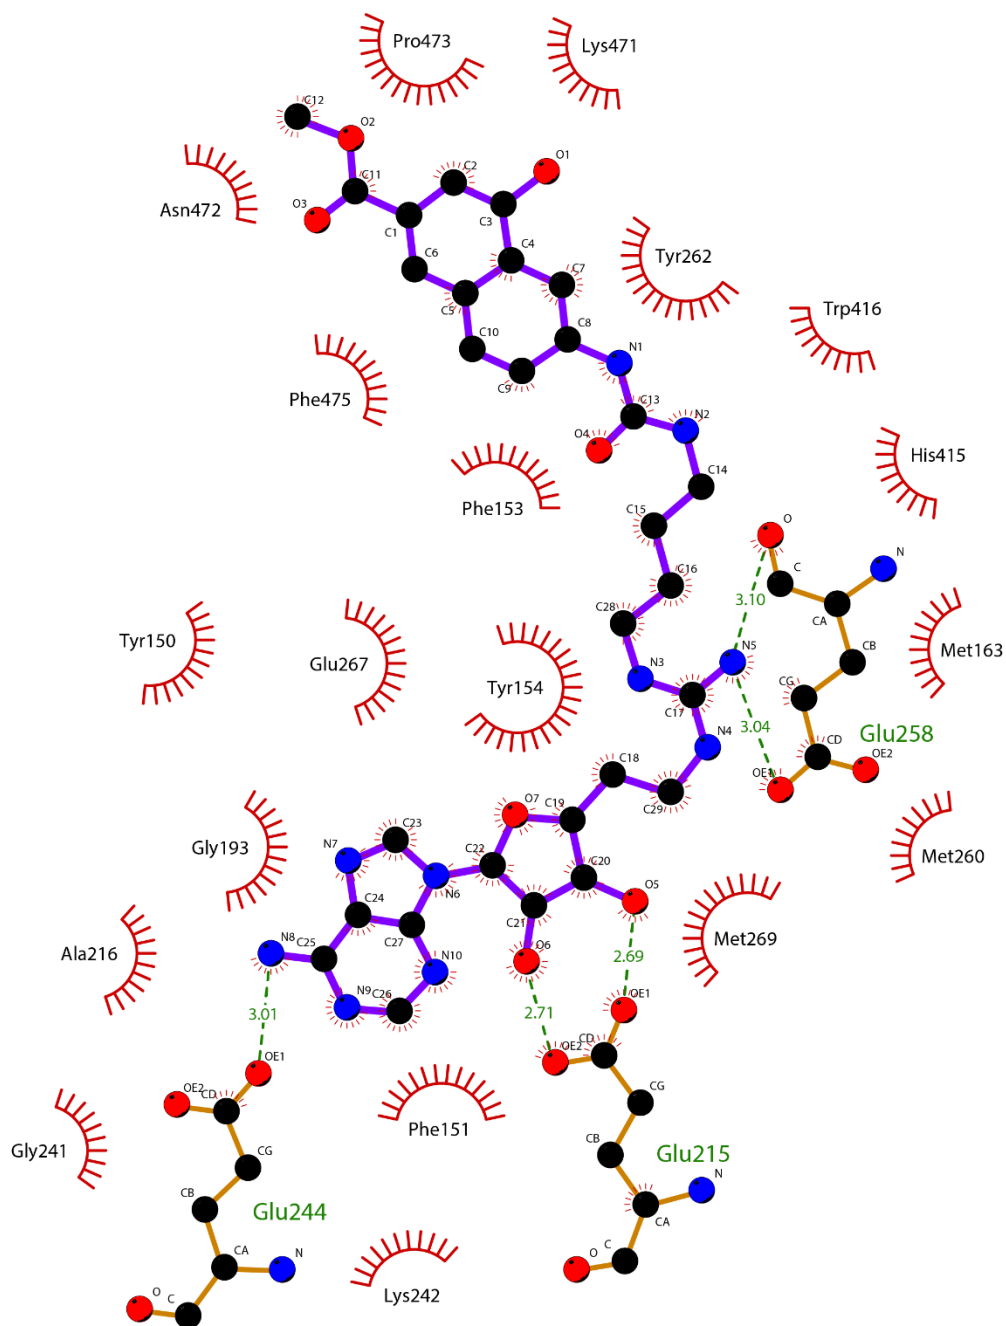

Flat representation done with LigPlot+ showing contacts between compound **12f** (EML980) and active site residues in PRMT4 (subunit B). Hydrogen bonds are shown as dotted lines. The spoked arcs represent protein residues making non-bonded (hydrophobic) contacts with compounds.

Figure S9.

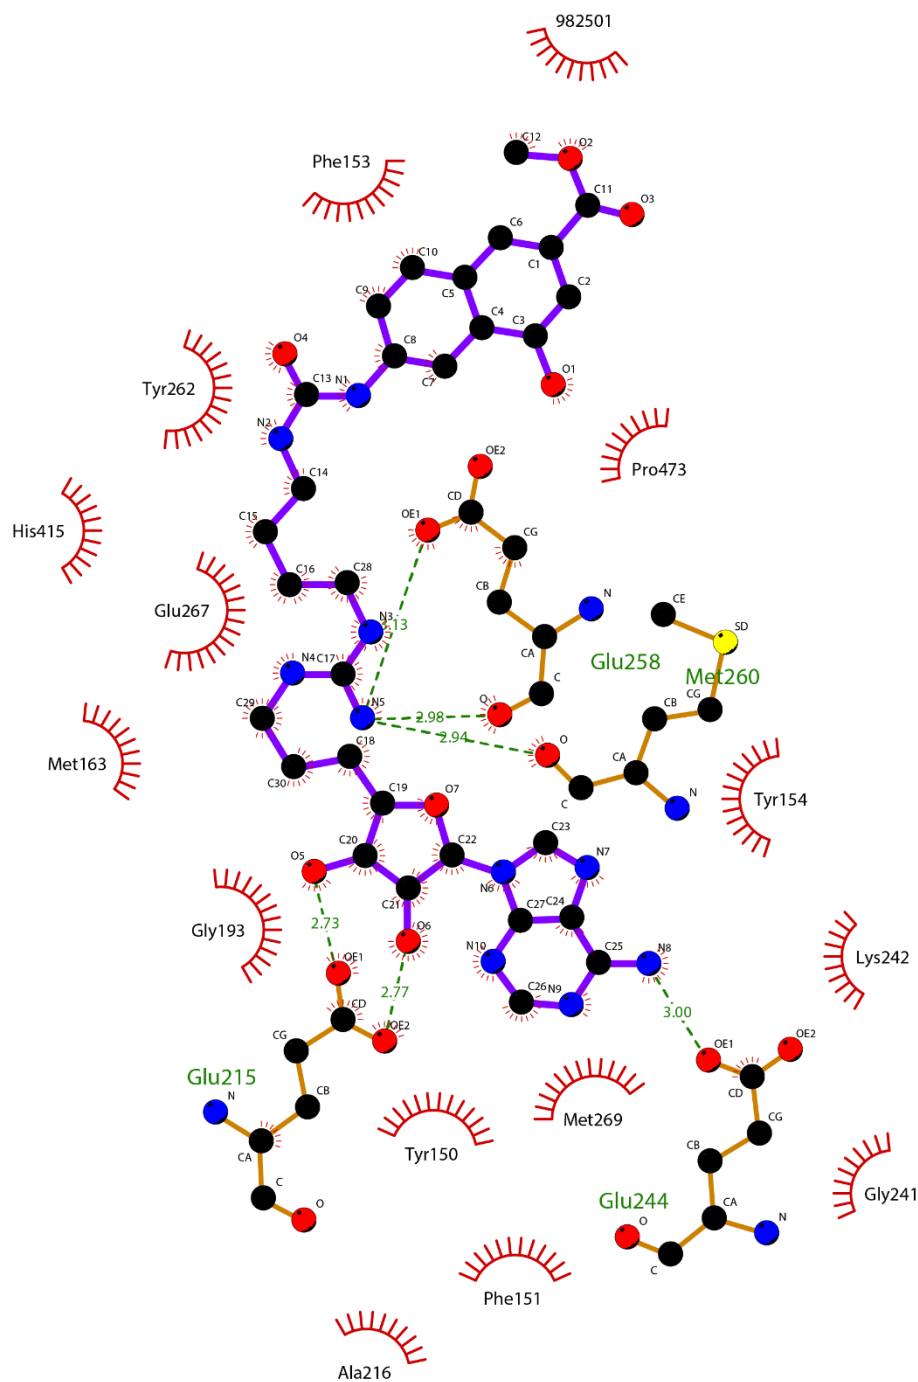

Figure S10.

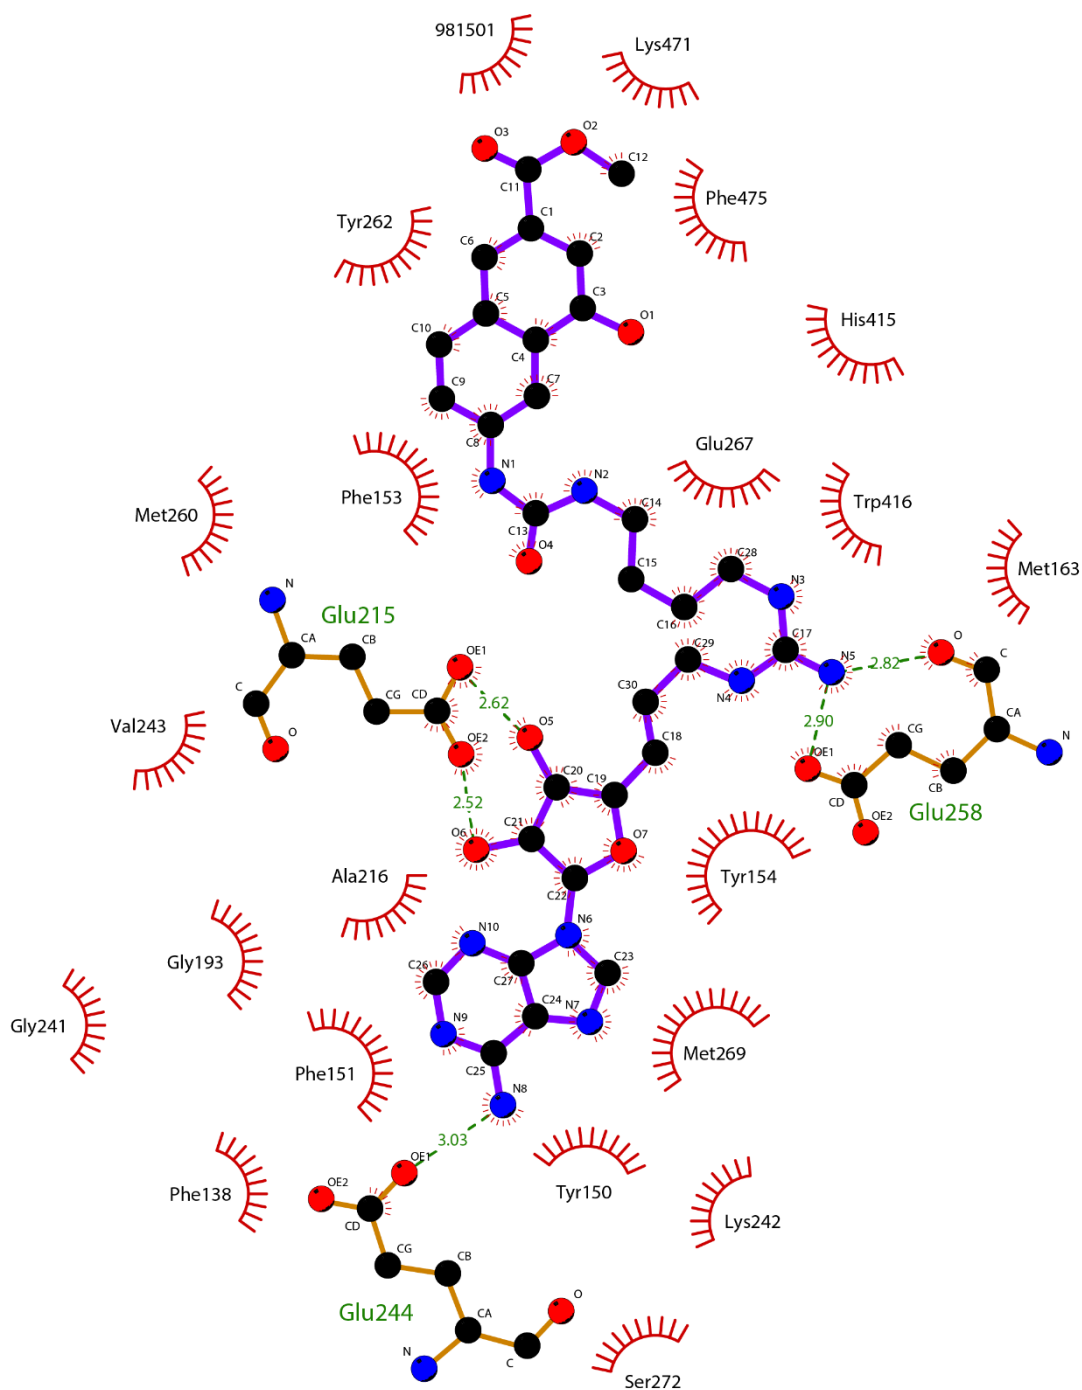

Flat representation done with LigPlot+ showing contacts between compound **12h** (EML981) and active site residues in PRMT4 (subunit B). Hydrogen bonds are shown as dotted lines. The spoked arcs represent protein residues making non-bonded (hydrophobic) contacts with compounds.



**Figure S11.**

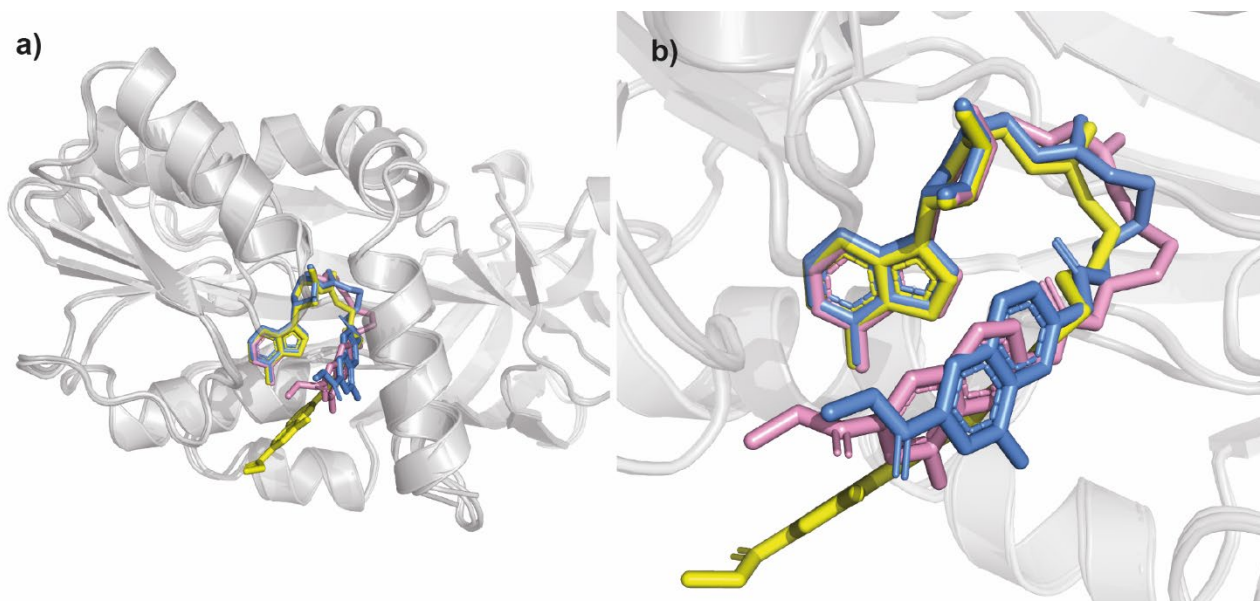

Structures of the complexes of PRMT6 and compounds **12a**, **12c**, and **12f** (PDB ID 7NUD, 7NUE, 7P2R, respectively). (a) Superimposition of compound **12a** (cornflower blue sticks) bound to subunit A of *mm*PRMT6, compound **12c** (yellow sticks) bound to subunit A of *mm*PRMT6, compound **12f** (pink sticks) bound to subunit A of *mm*PRMT6. Superimposition is done on protein backbones. Protein subunits are shown as cartoons colored in different shades of grey; (b) close-up view of bound compound conformations. For clarity, the N-terminal helices of *mm*PRMT6 (residues 42–56) are not shown.

**Figure S12.**

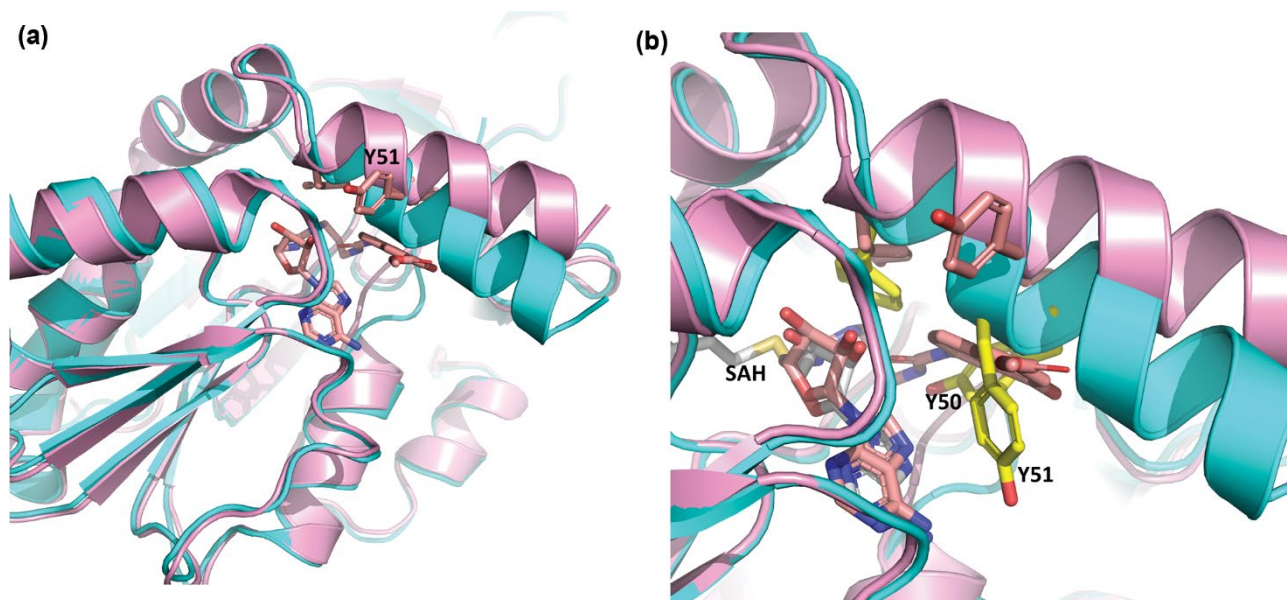

Conformational changes of PRMT6 alpha-X helix containing the motif I (Y50-Y51-X-X-Y54) (a) Superimposition of the structures of compound **12a** (EML734) bound to PRMT6 (pink cartoon, PDB ID 7NUD) and of the PRMT6/SAH complex (PDB ID 5FQN, cyan cartoon). Y51 of motif I and **12a** are shown as sticks. (B) Close-up view displaying also Y50, Y51 (yellow sticks) and SAH molecule (grey sticks) as seen in PRMT6/SAH structure.



Table S2. Permeability values of compounds **12f–h**

| #                  | PAMPA $P_{app}$ (cm/s) |
|--------------------|------------------------|
| <b>12f</b>         | $0.55 \times 10^{-7}$  |
| <b>12g</b>         | $0.39 \times 10^{-7}$  |
| <b>12h</b>         | $0.38 \times 10^{-7}$  |
| <b>propranolol</b> | $60 \times 10^{-7}$    |
| <b>furosemide</b>  | $0.34 \times 10^{-7}$  |

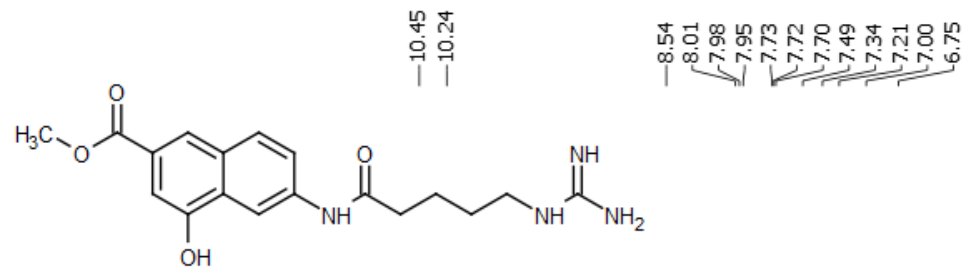

**5a**

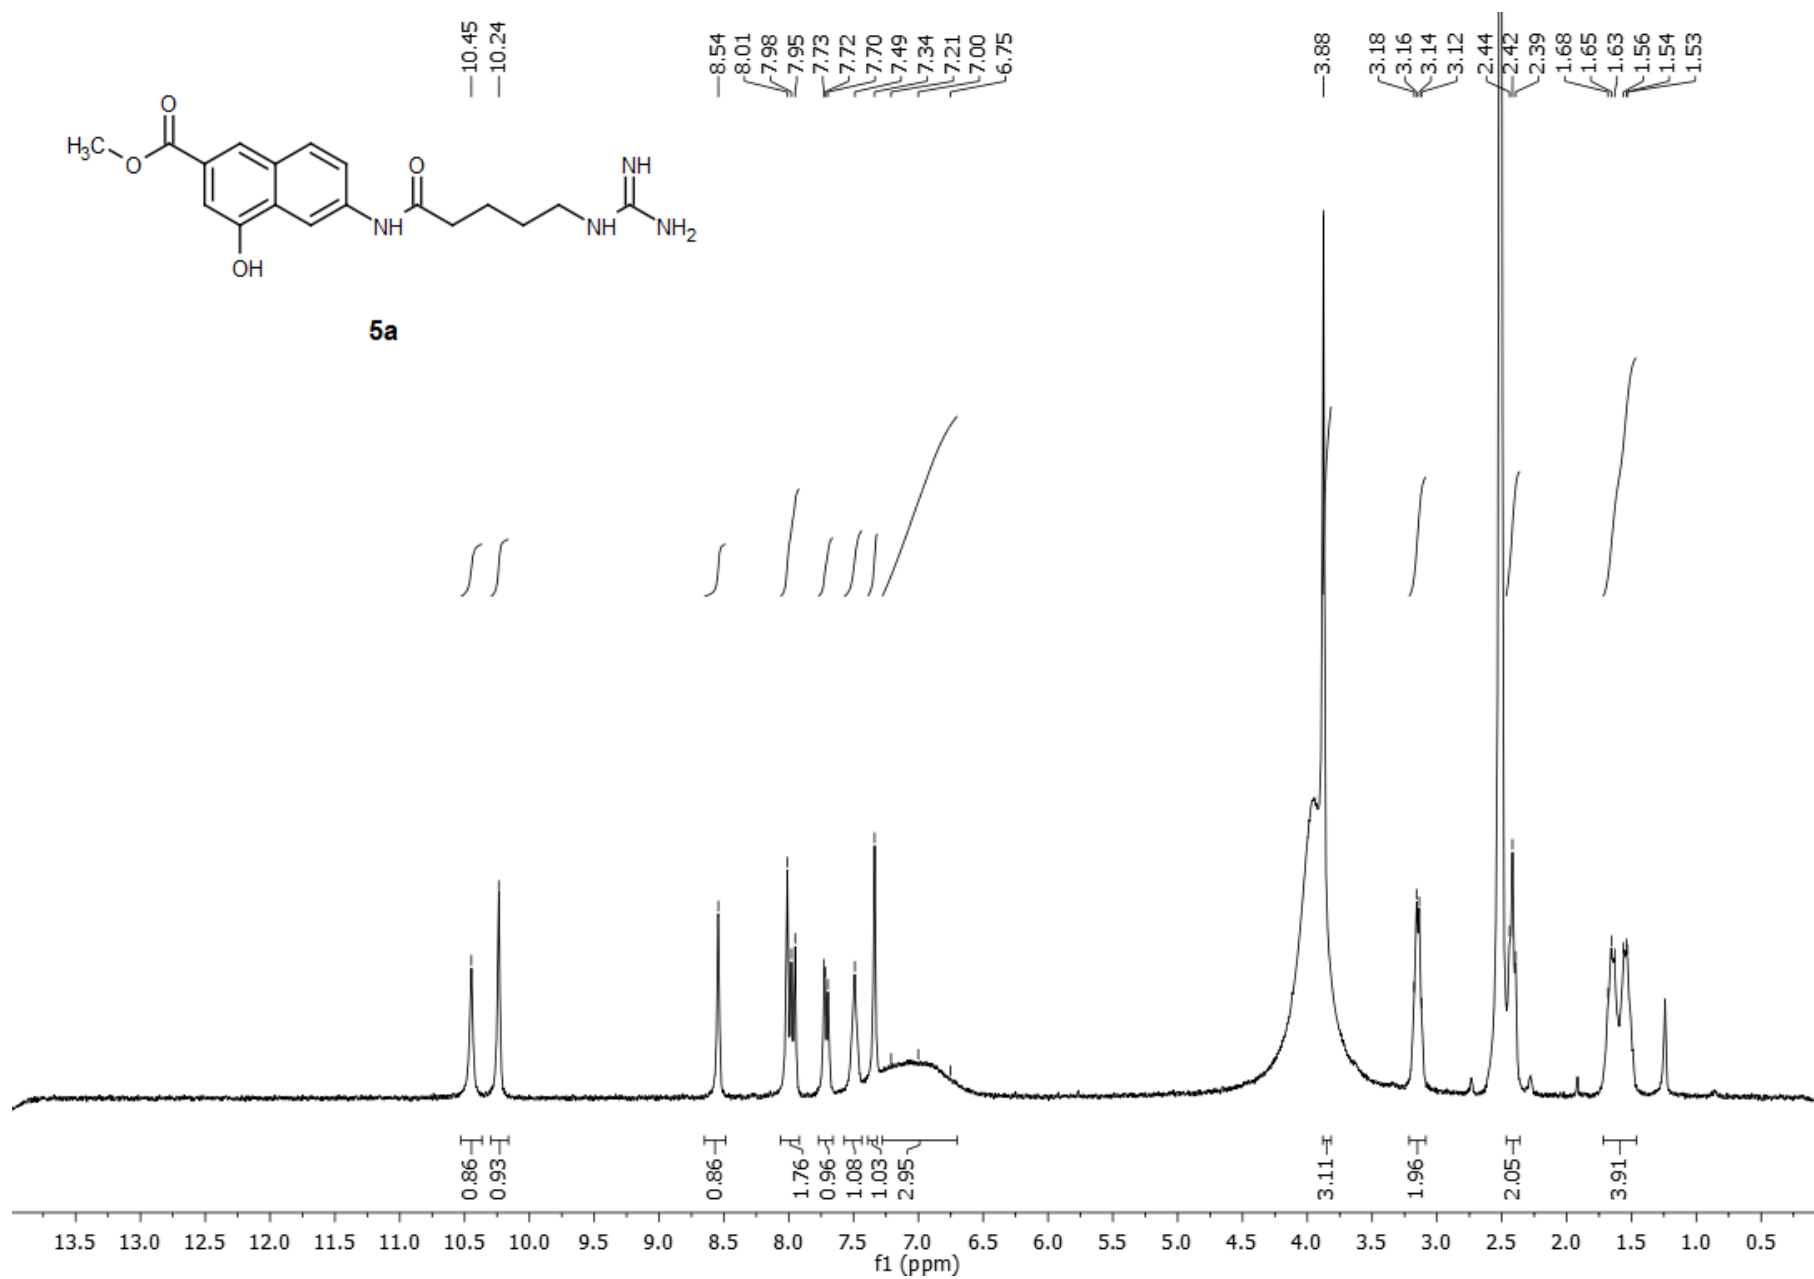

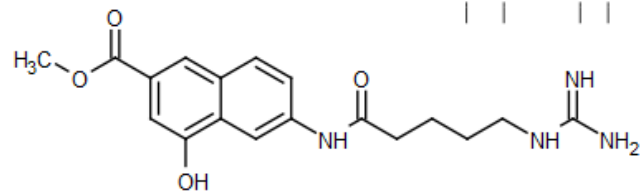

5a

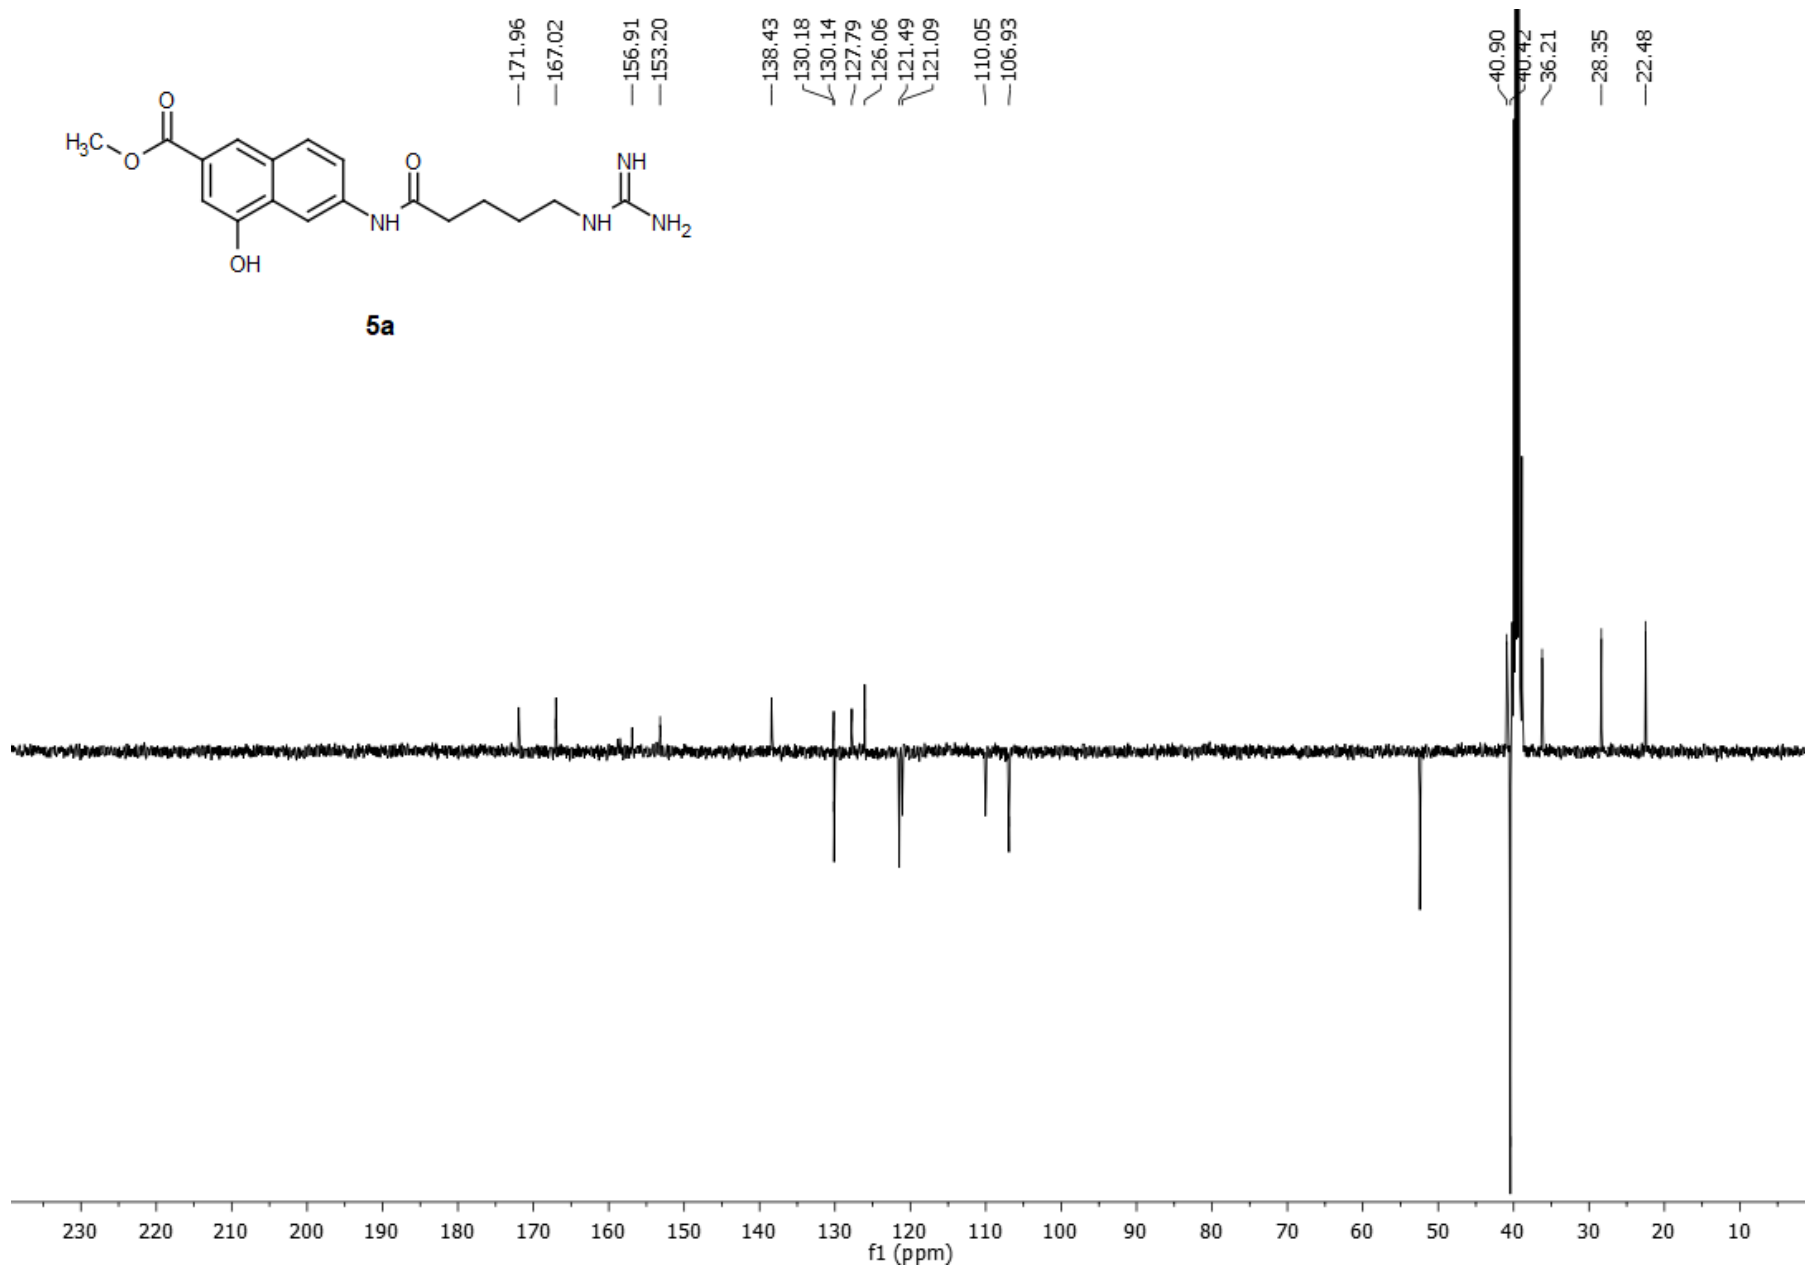

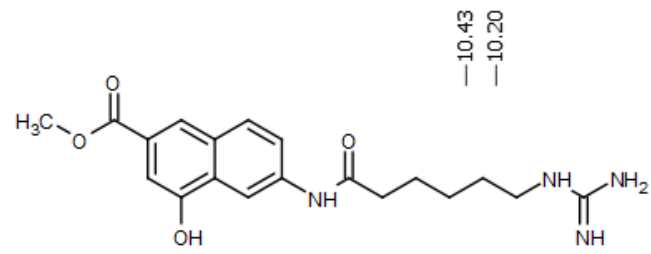

5b

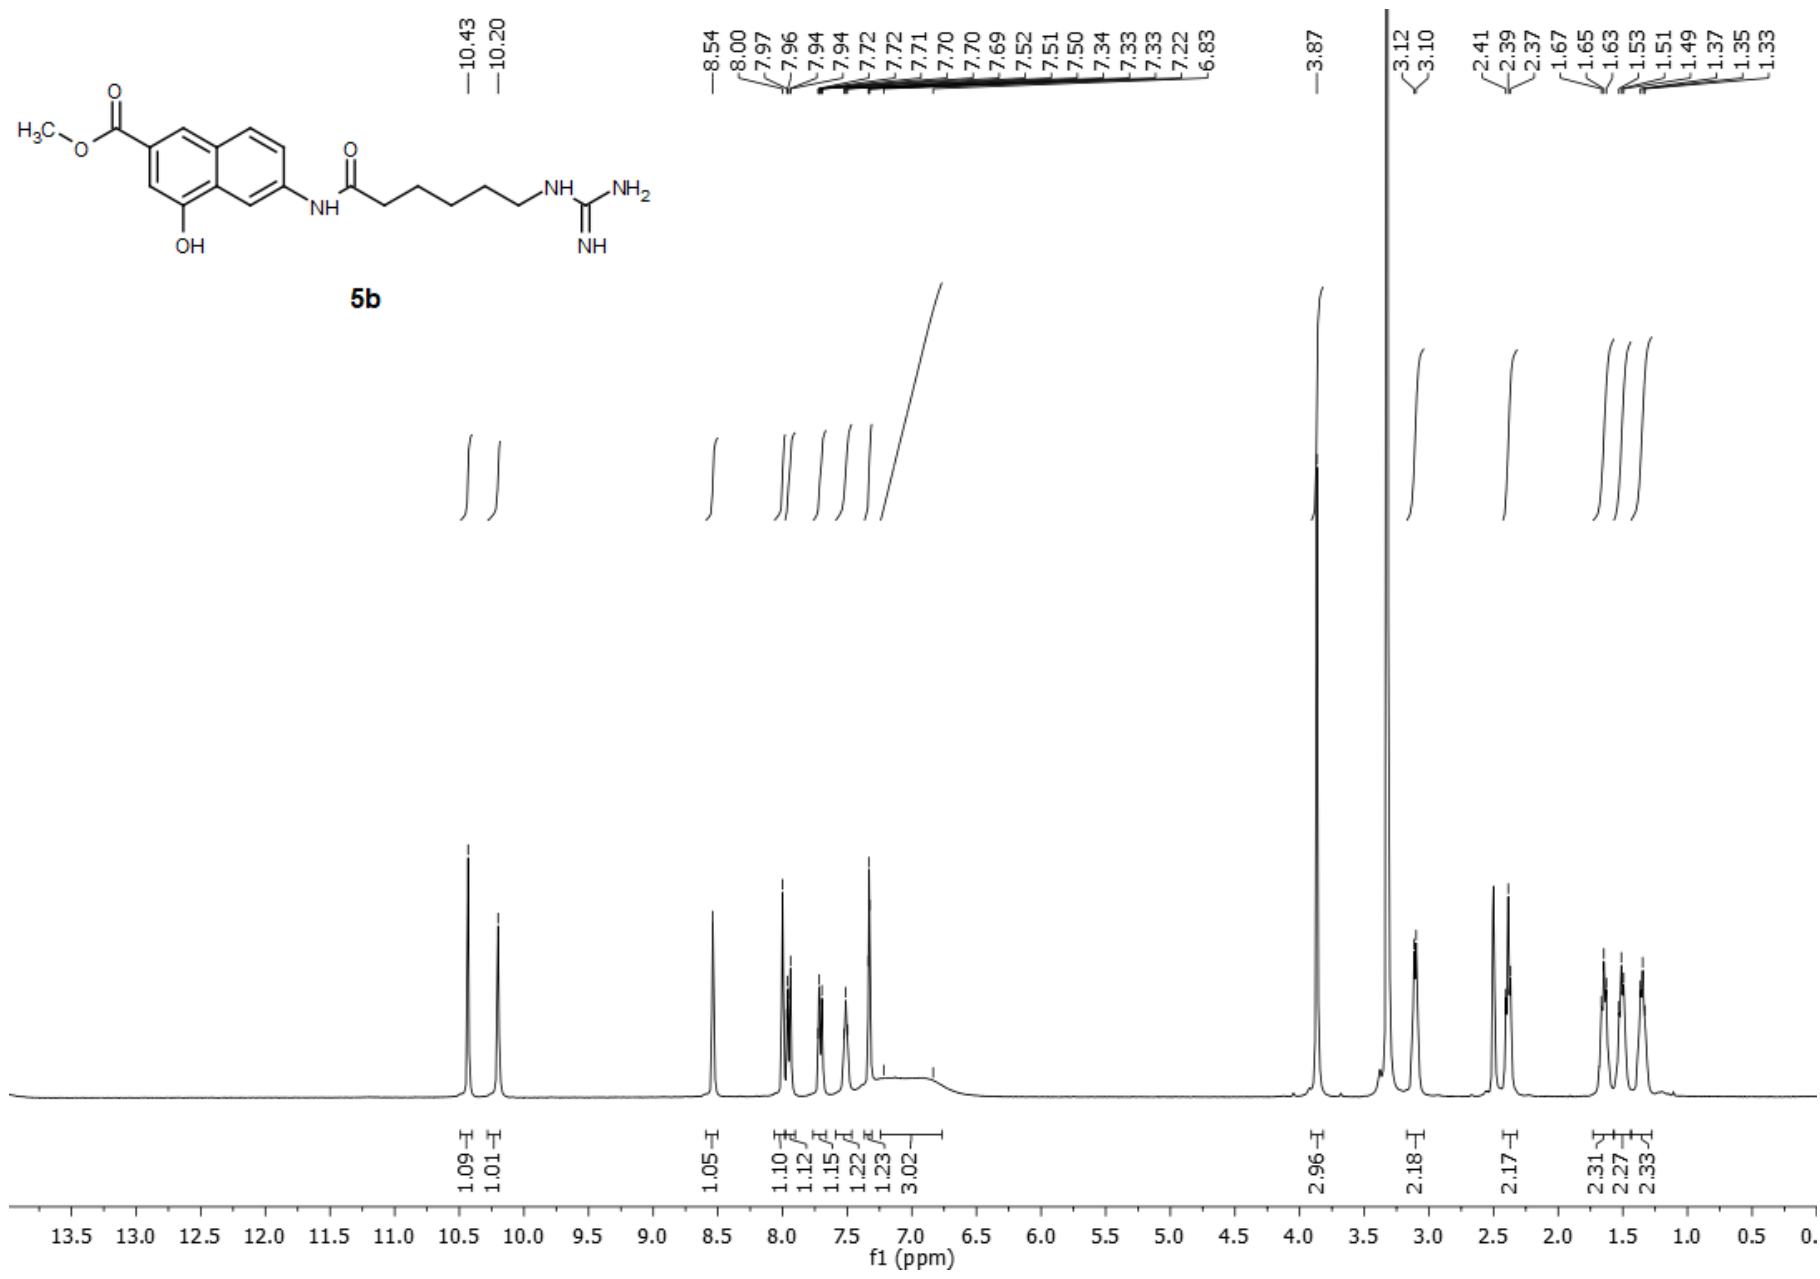

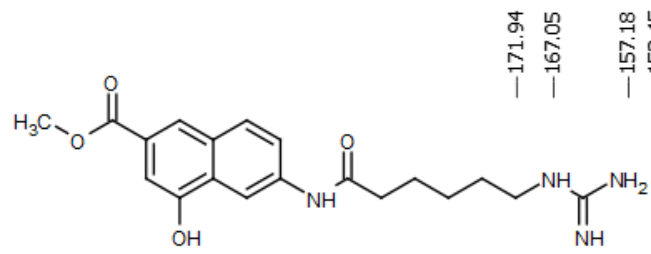

5b

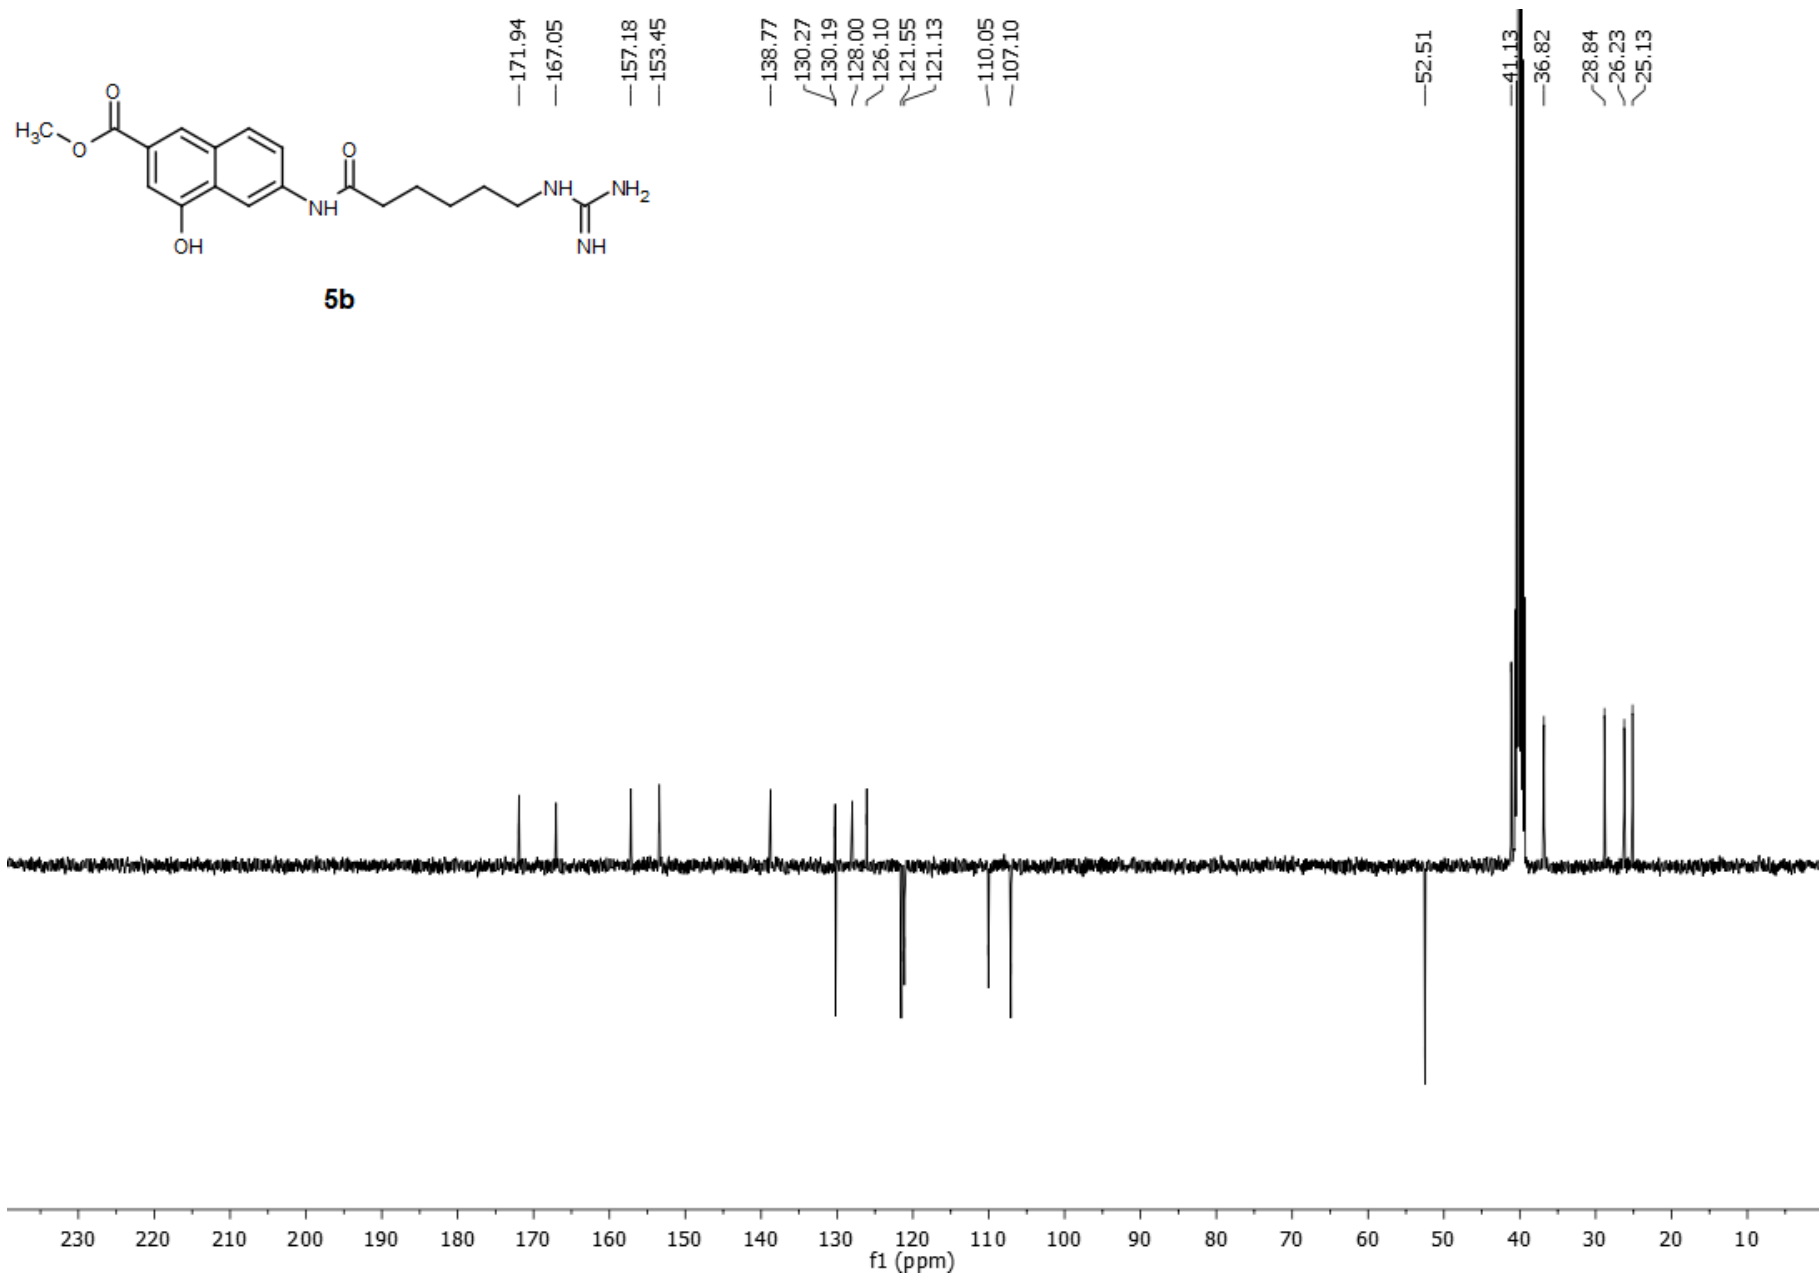

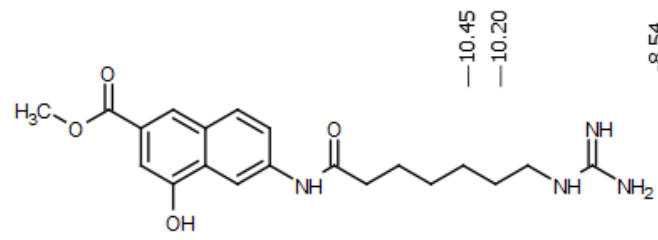

**5c**

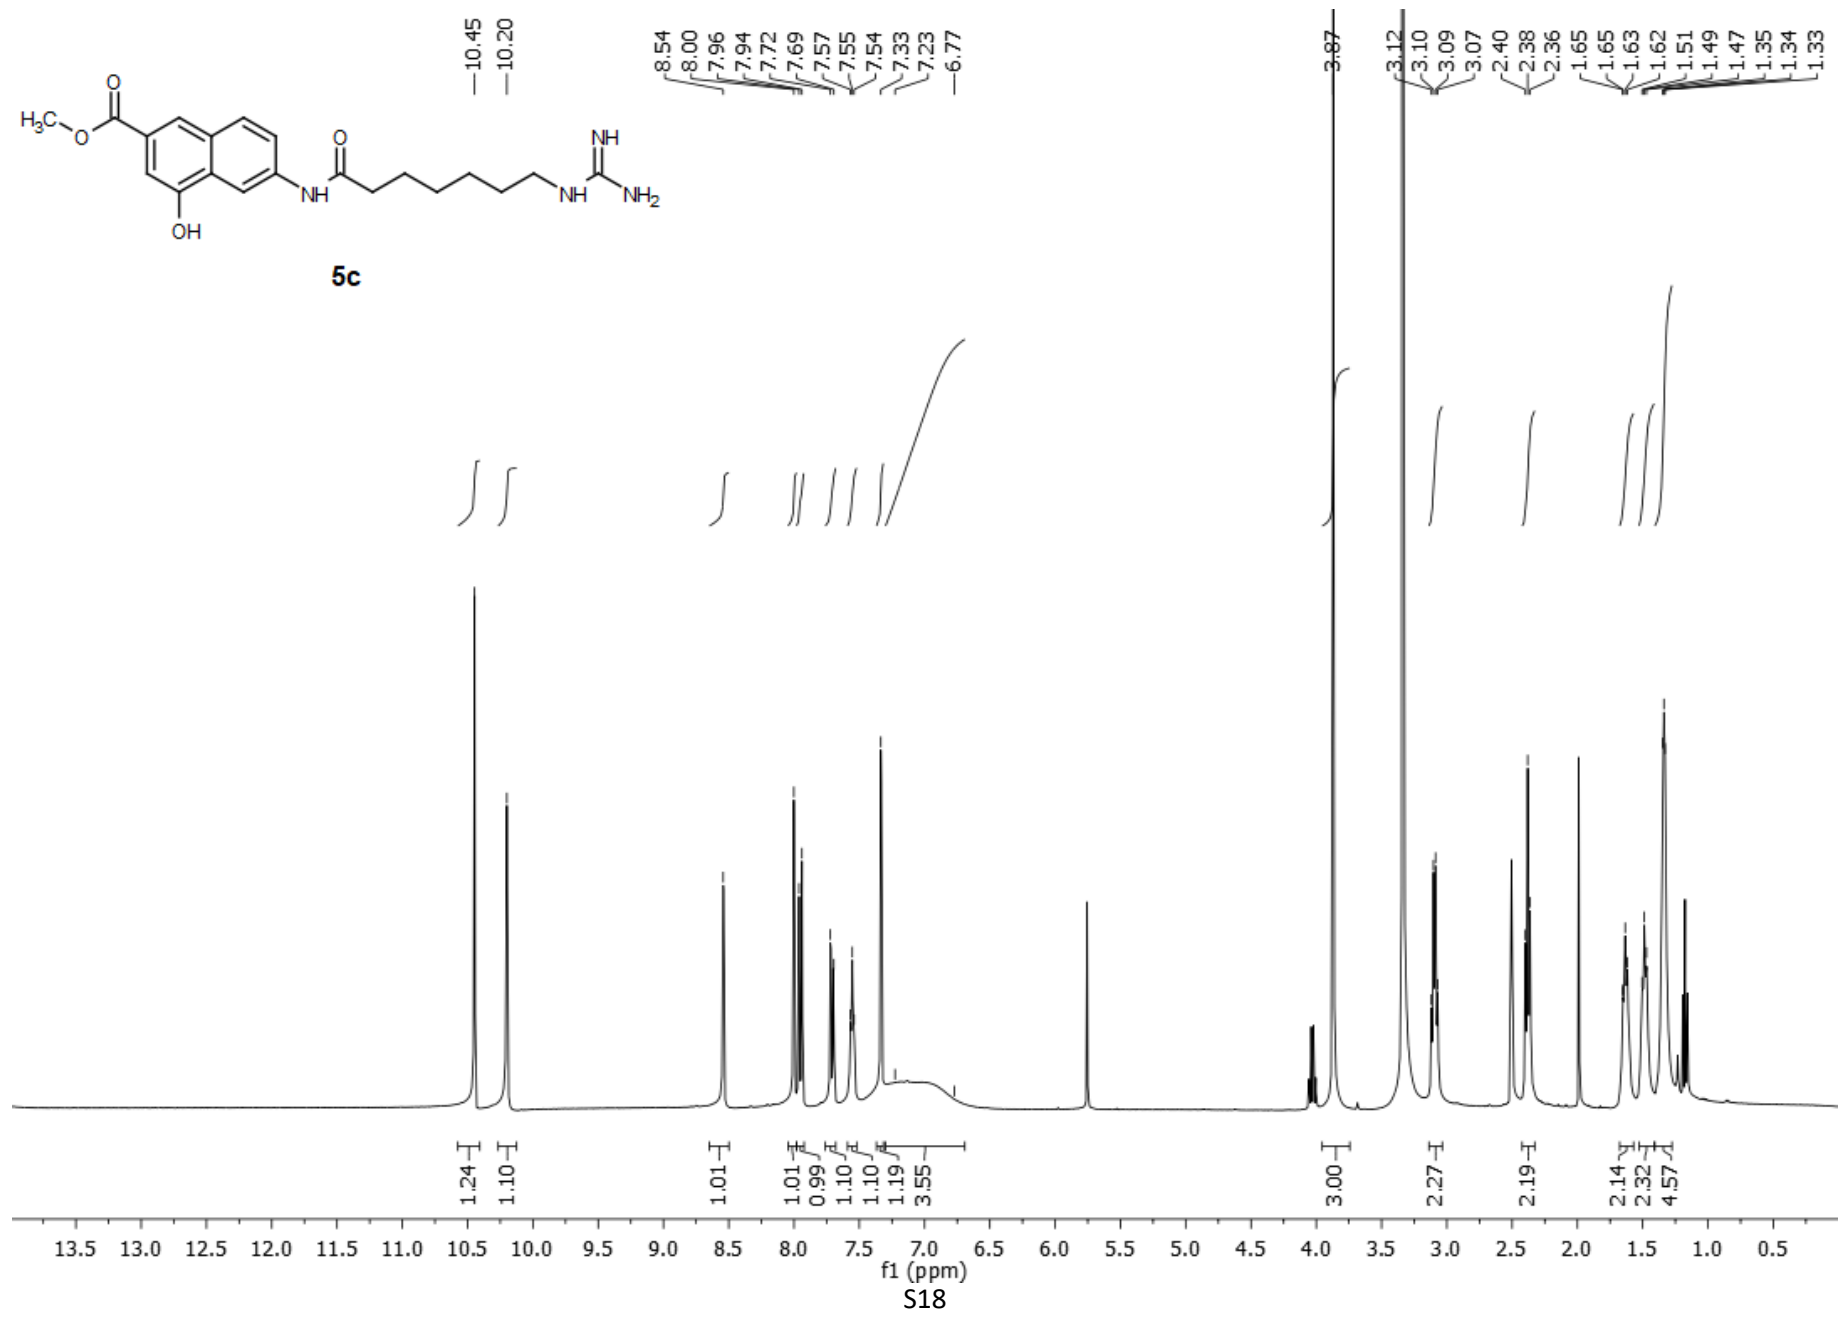

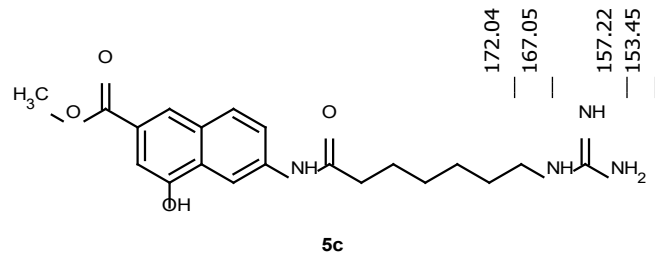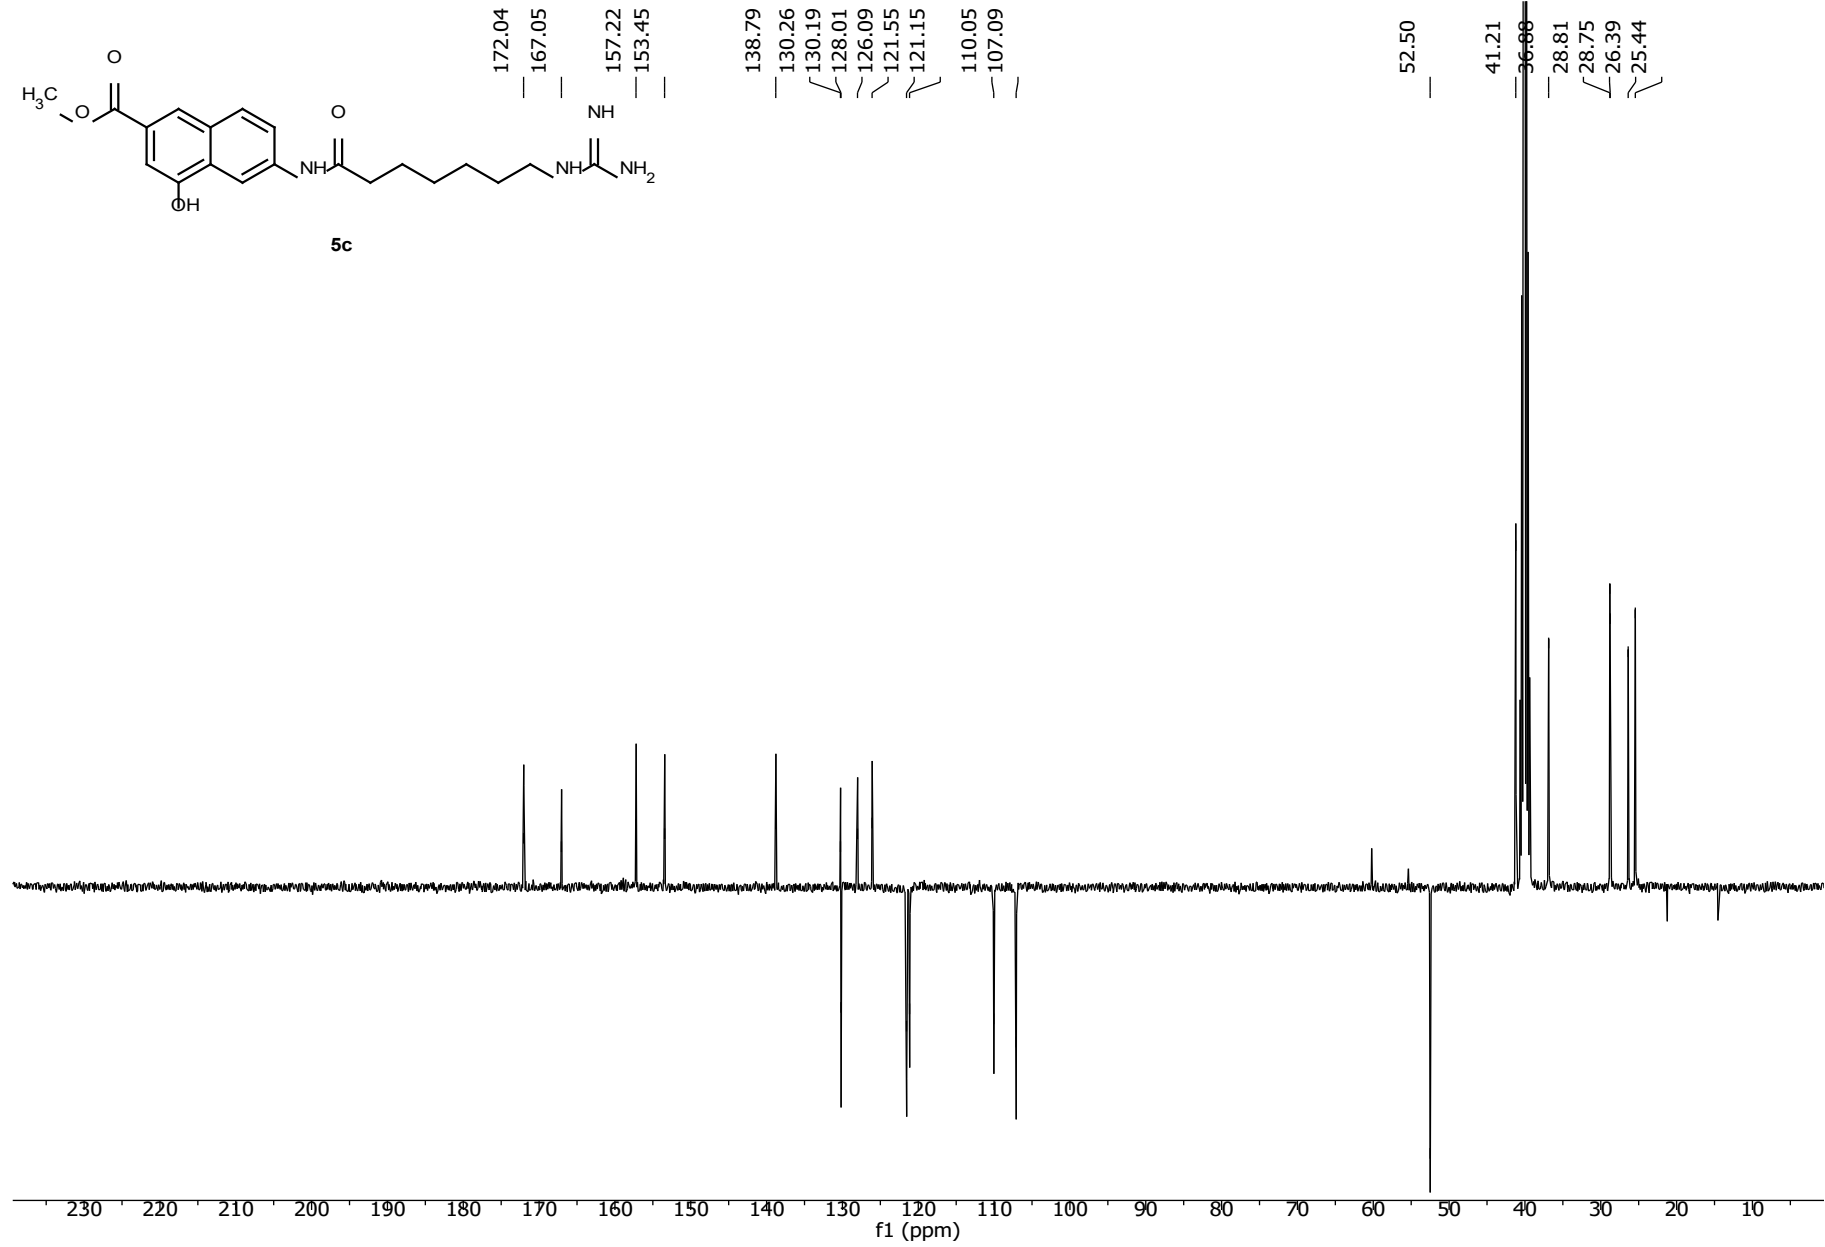

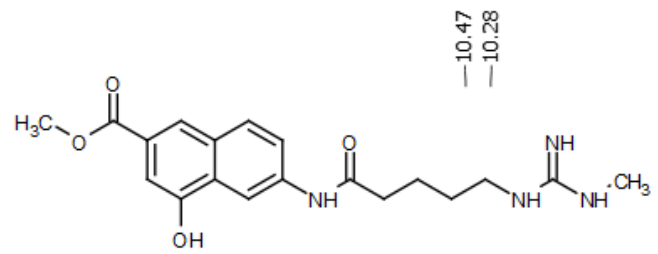

5d

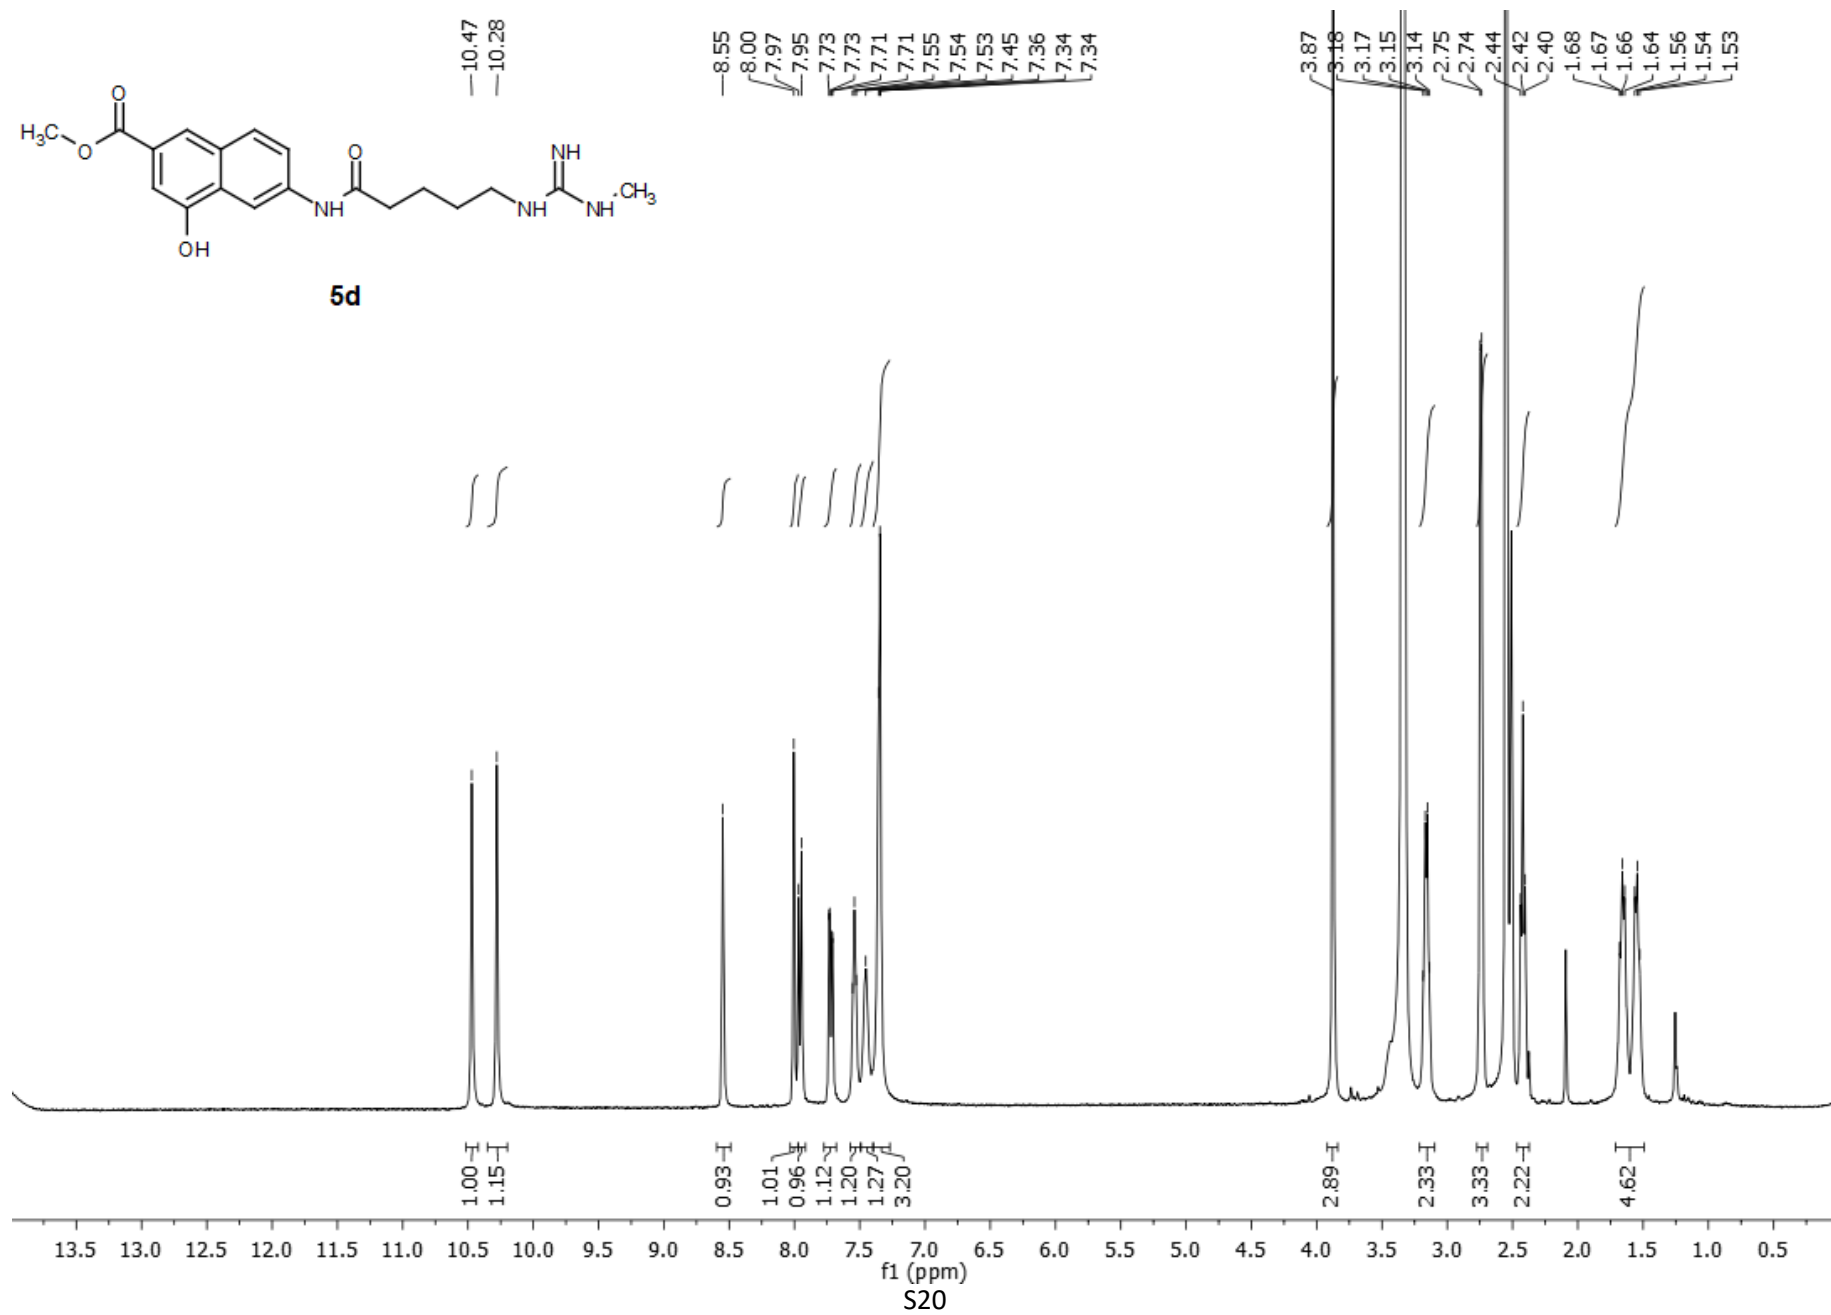



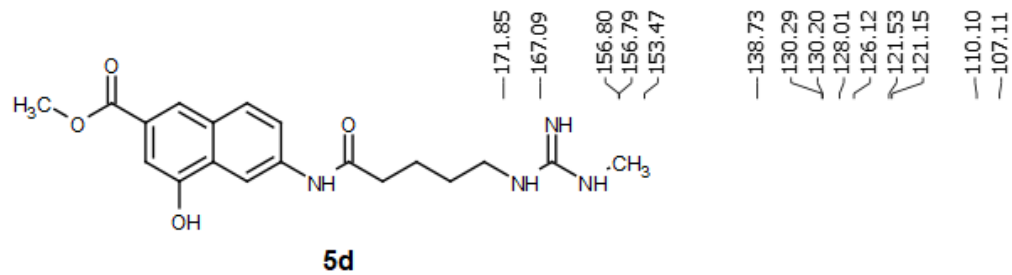

Chemical shift values (ppm) for the spectrum:

- 52.51
- 41.13
- 36.42
- 28.64
- 28.39
- 22.67

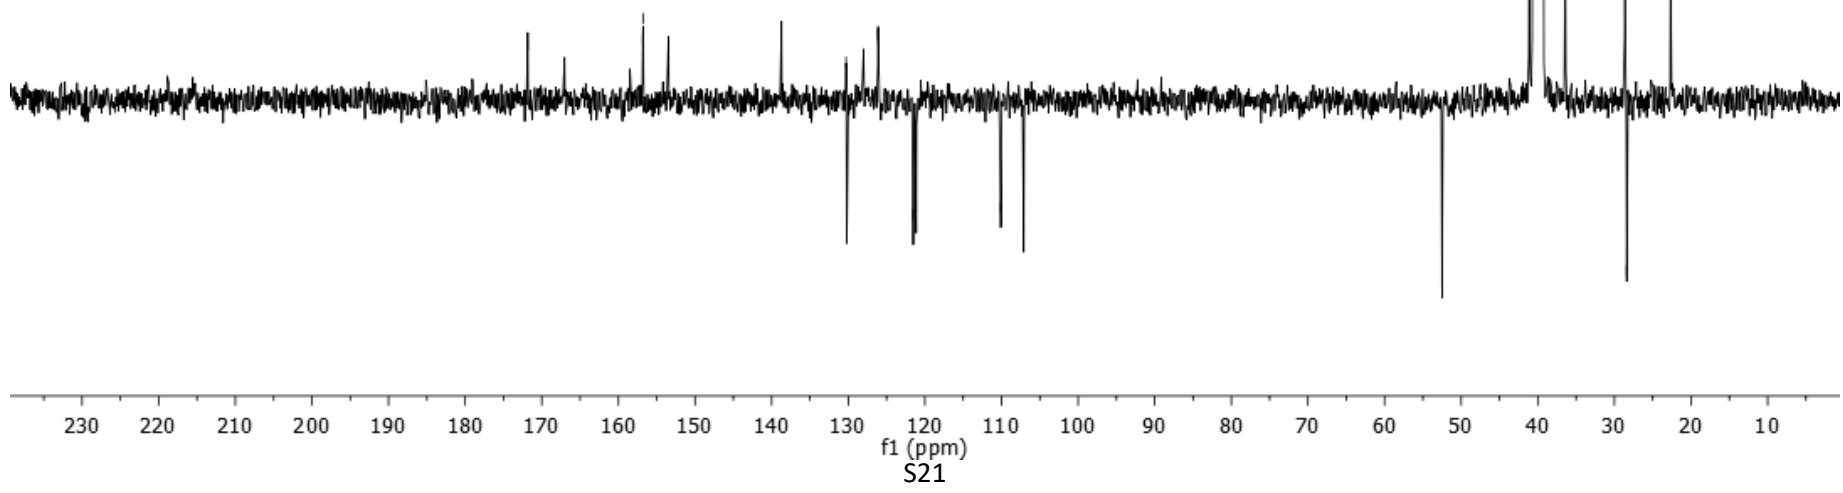

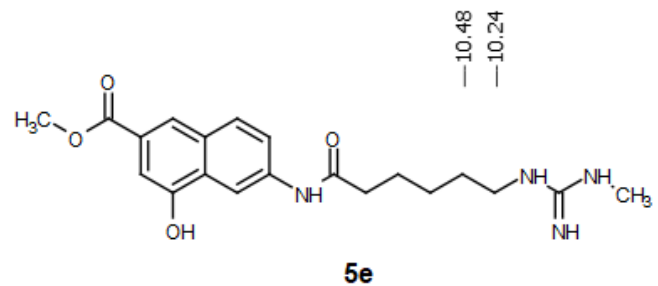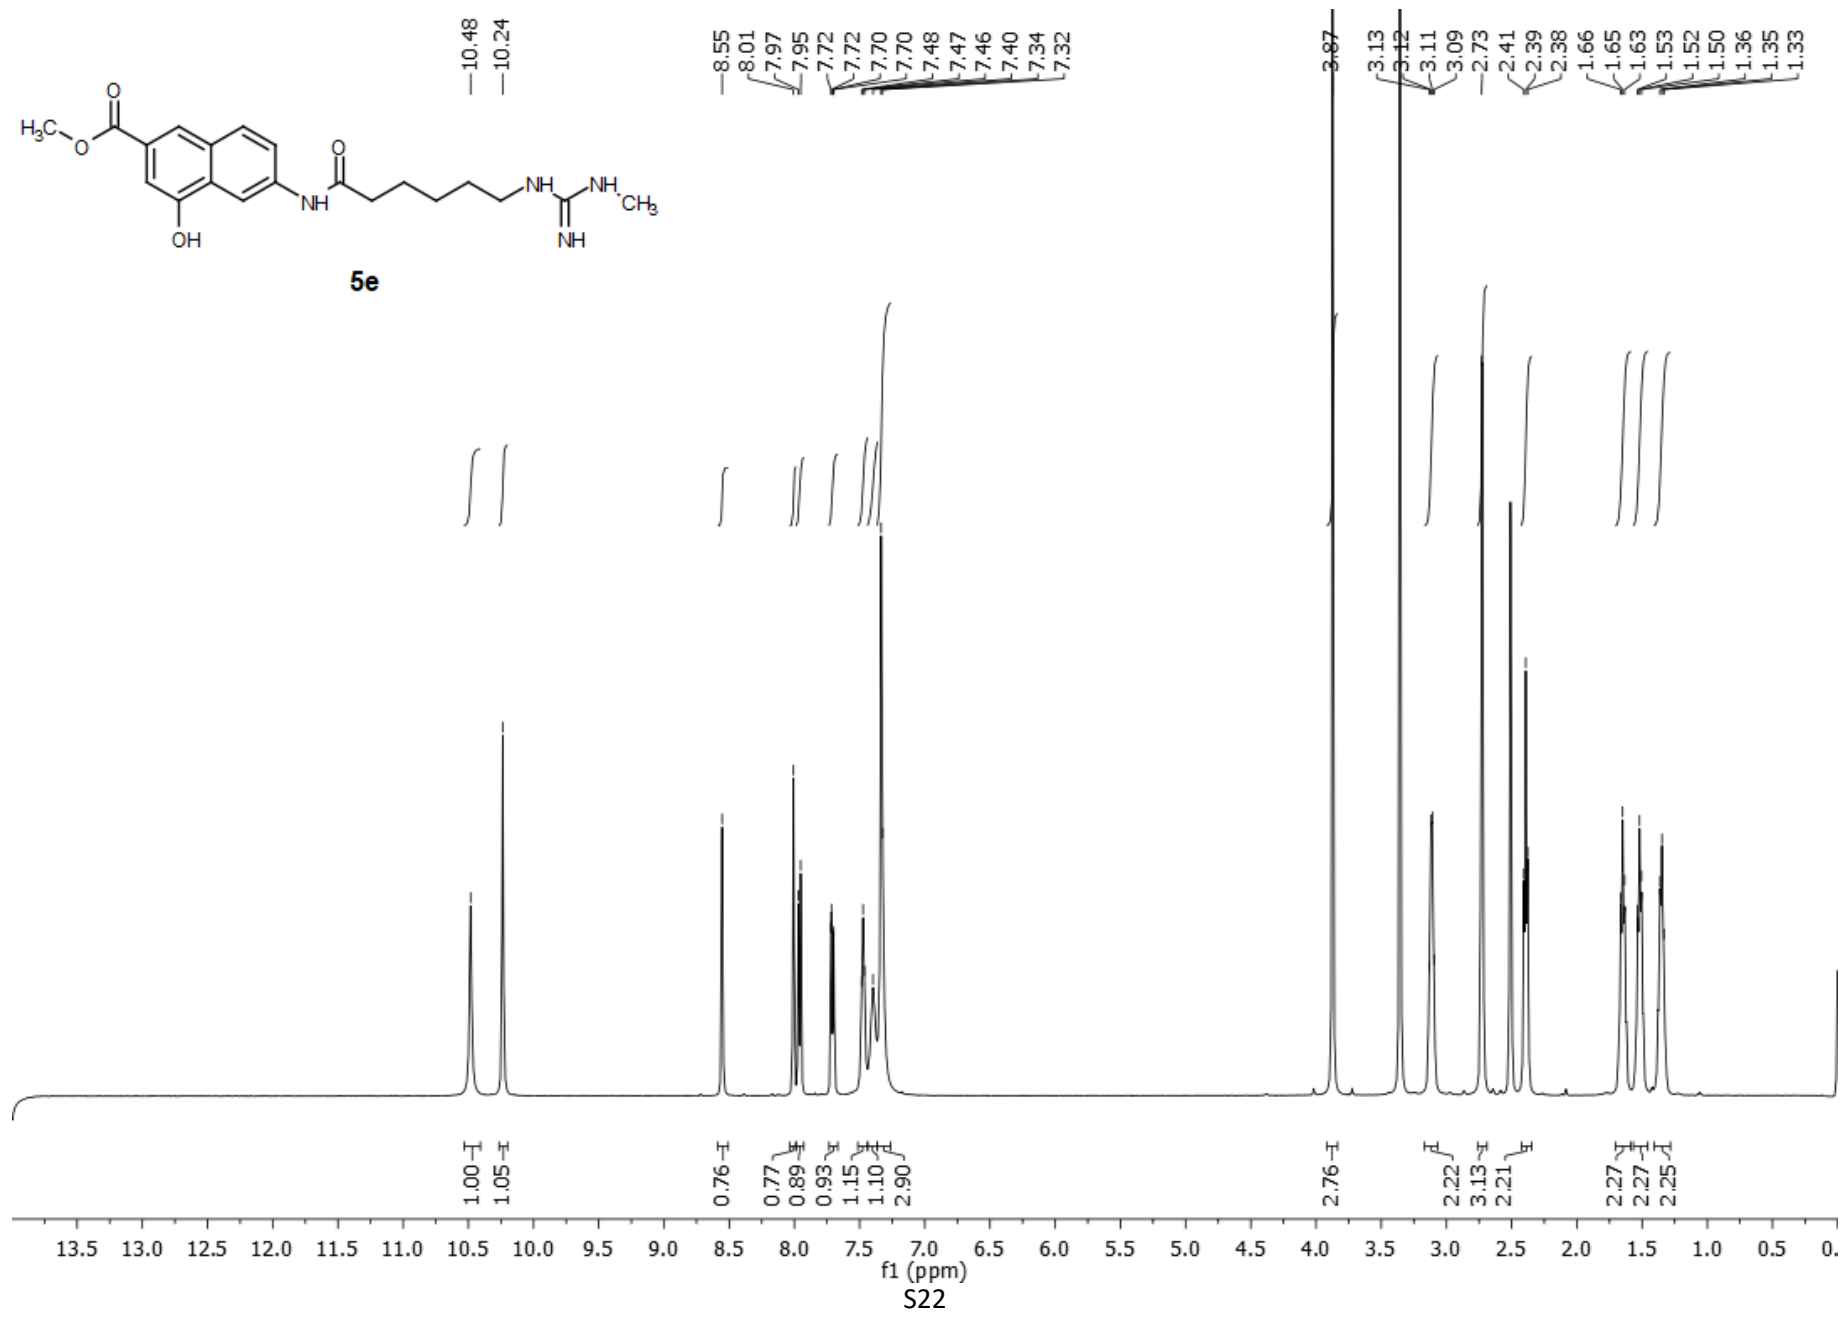

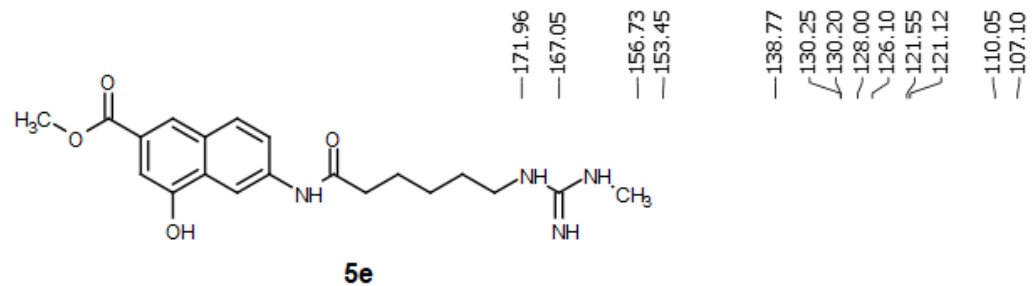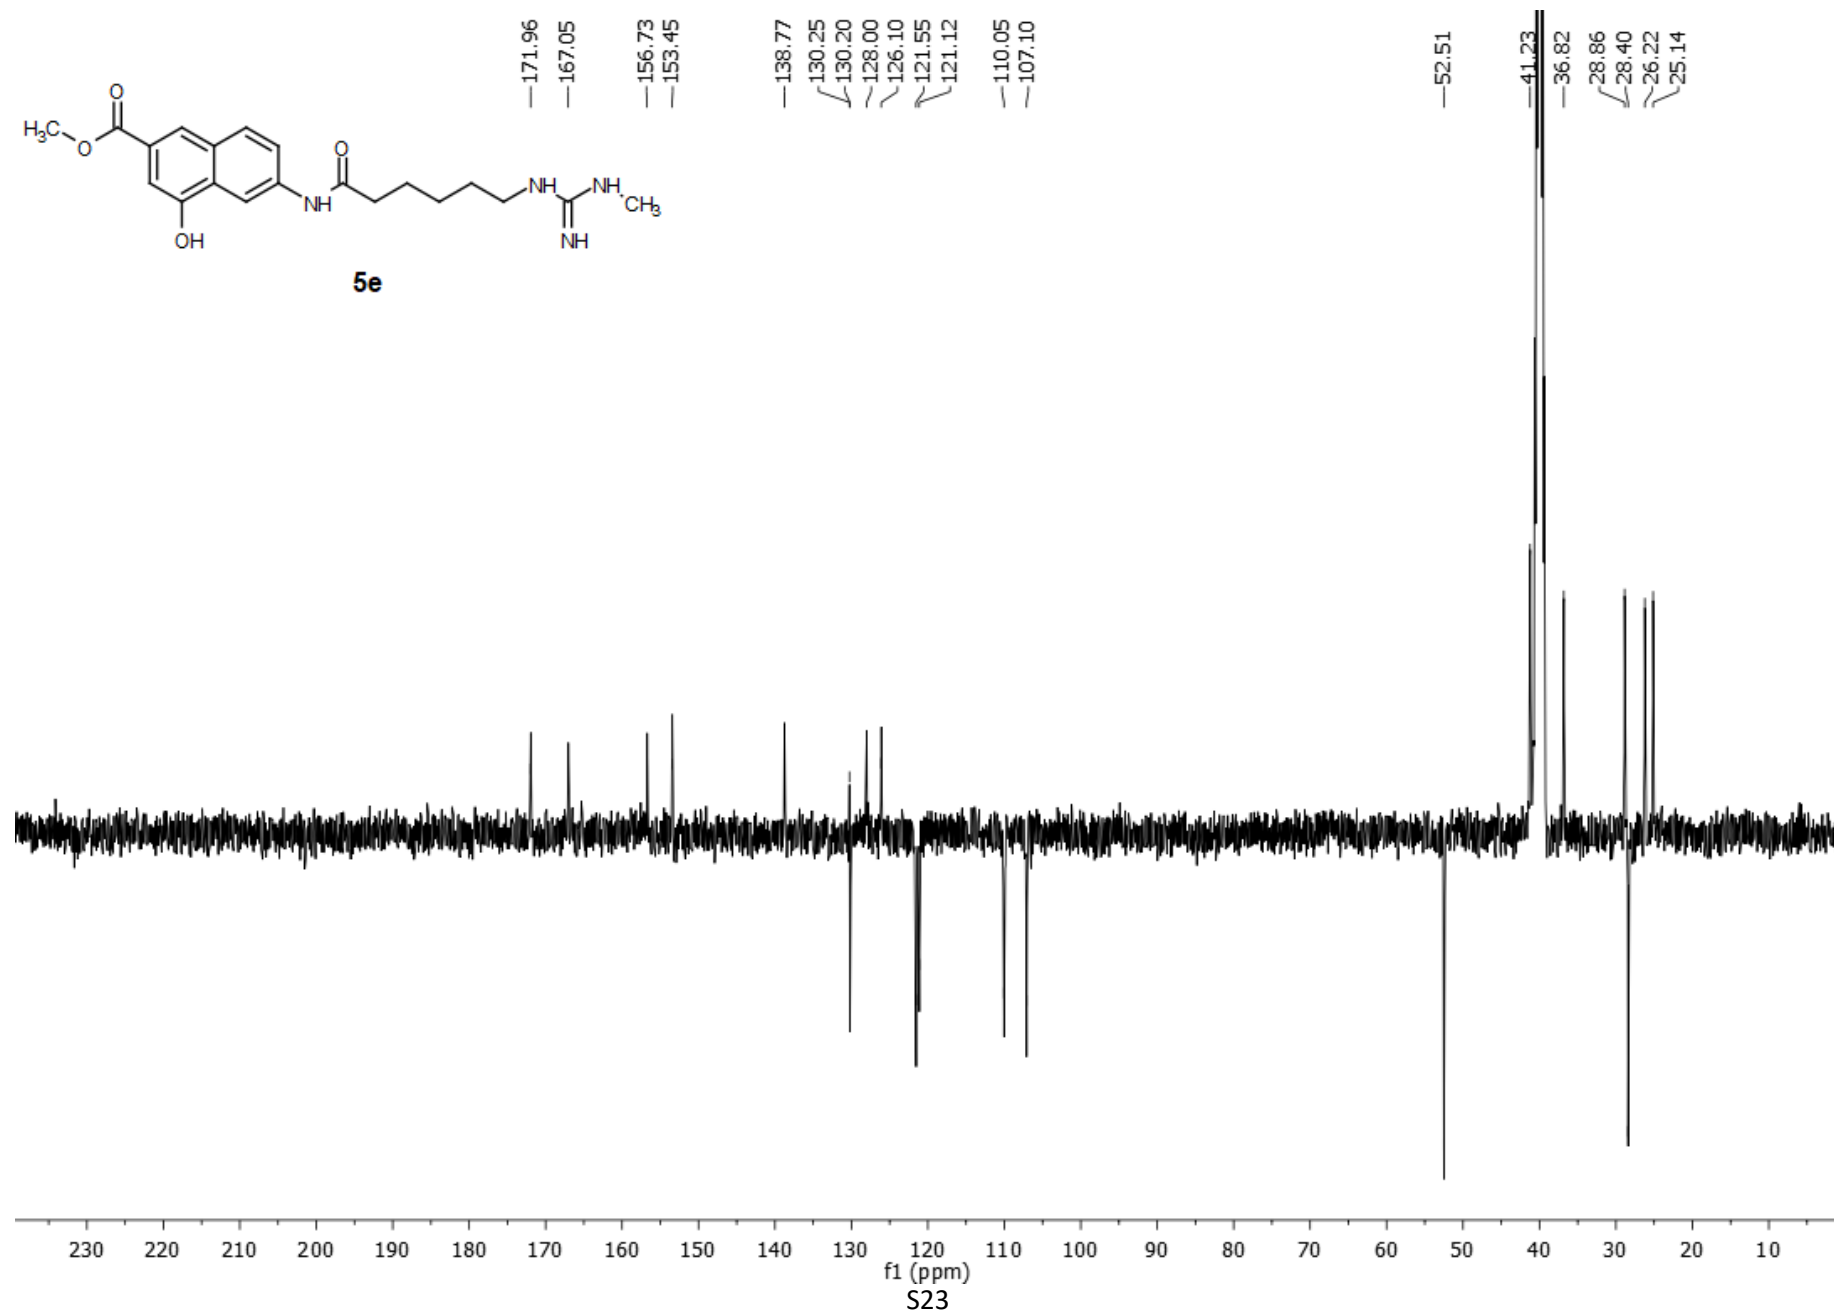



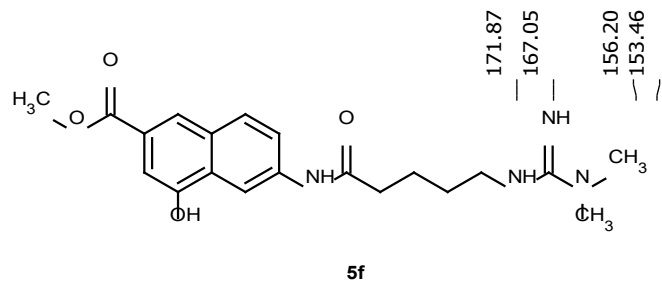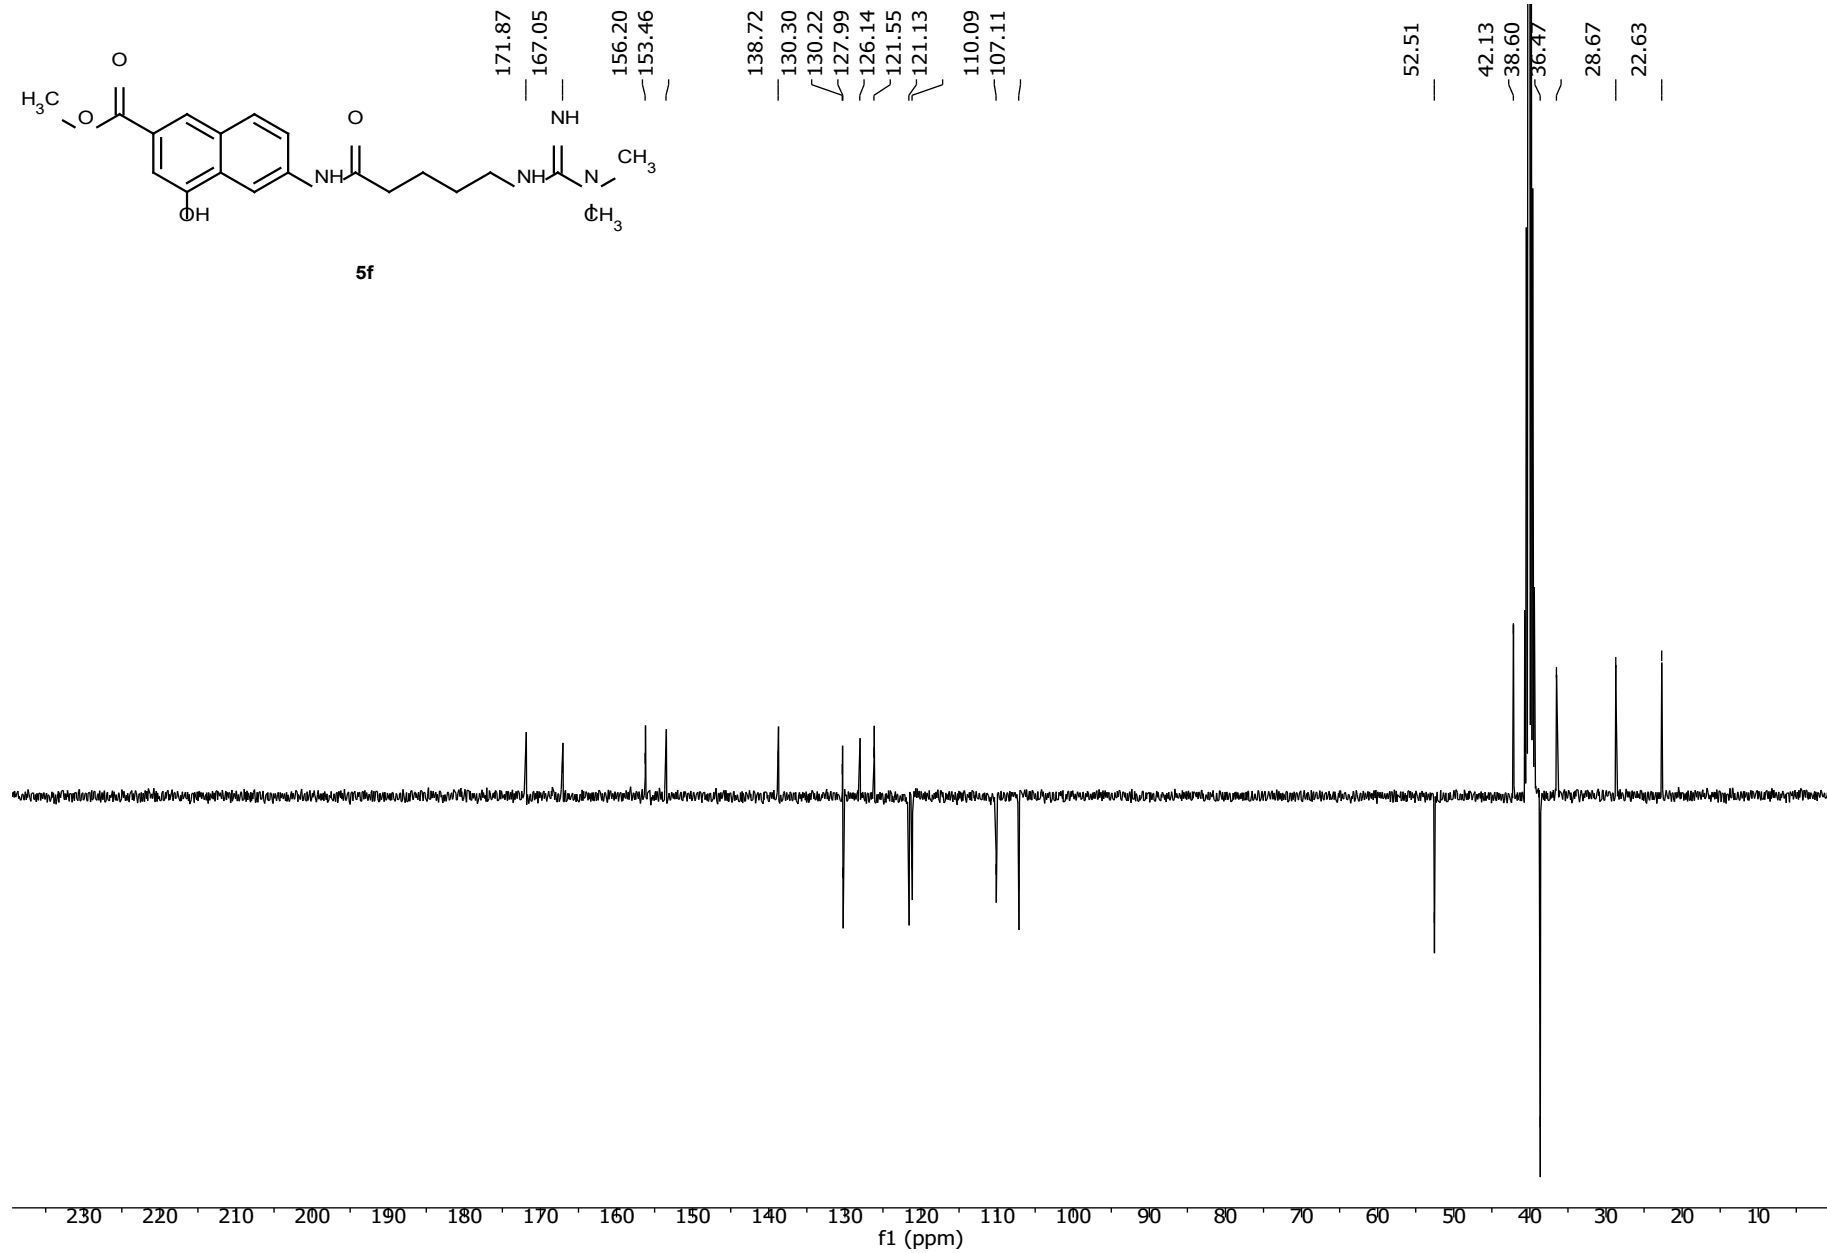

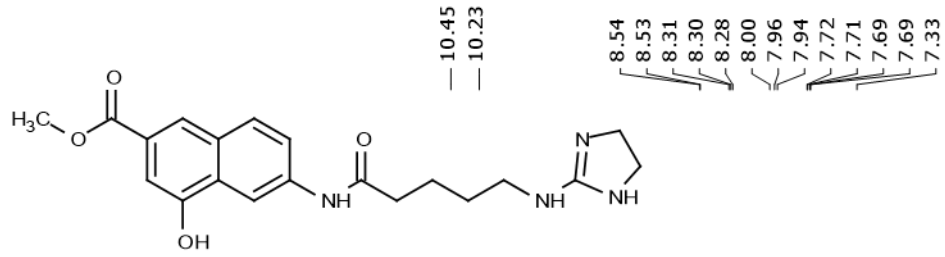

**5g**

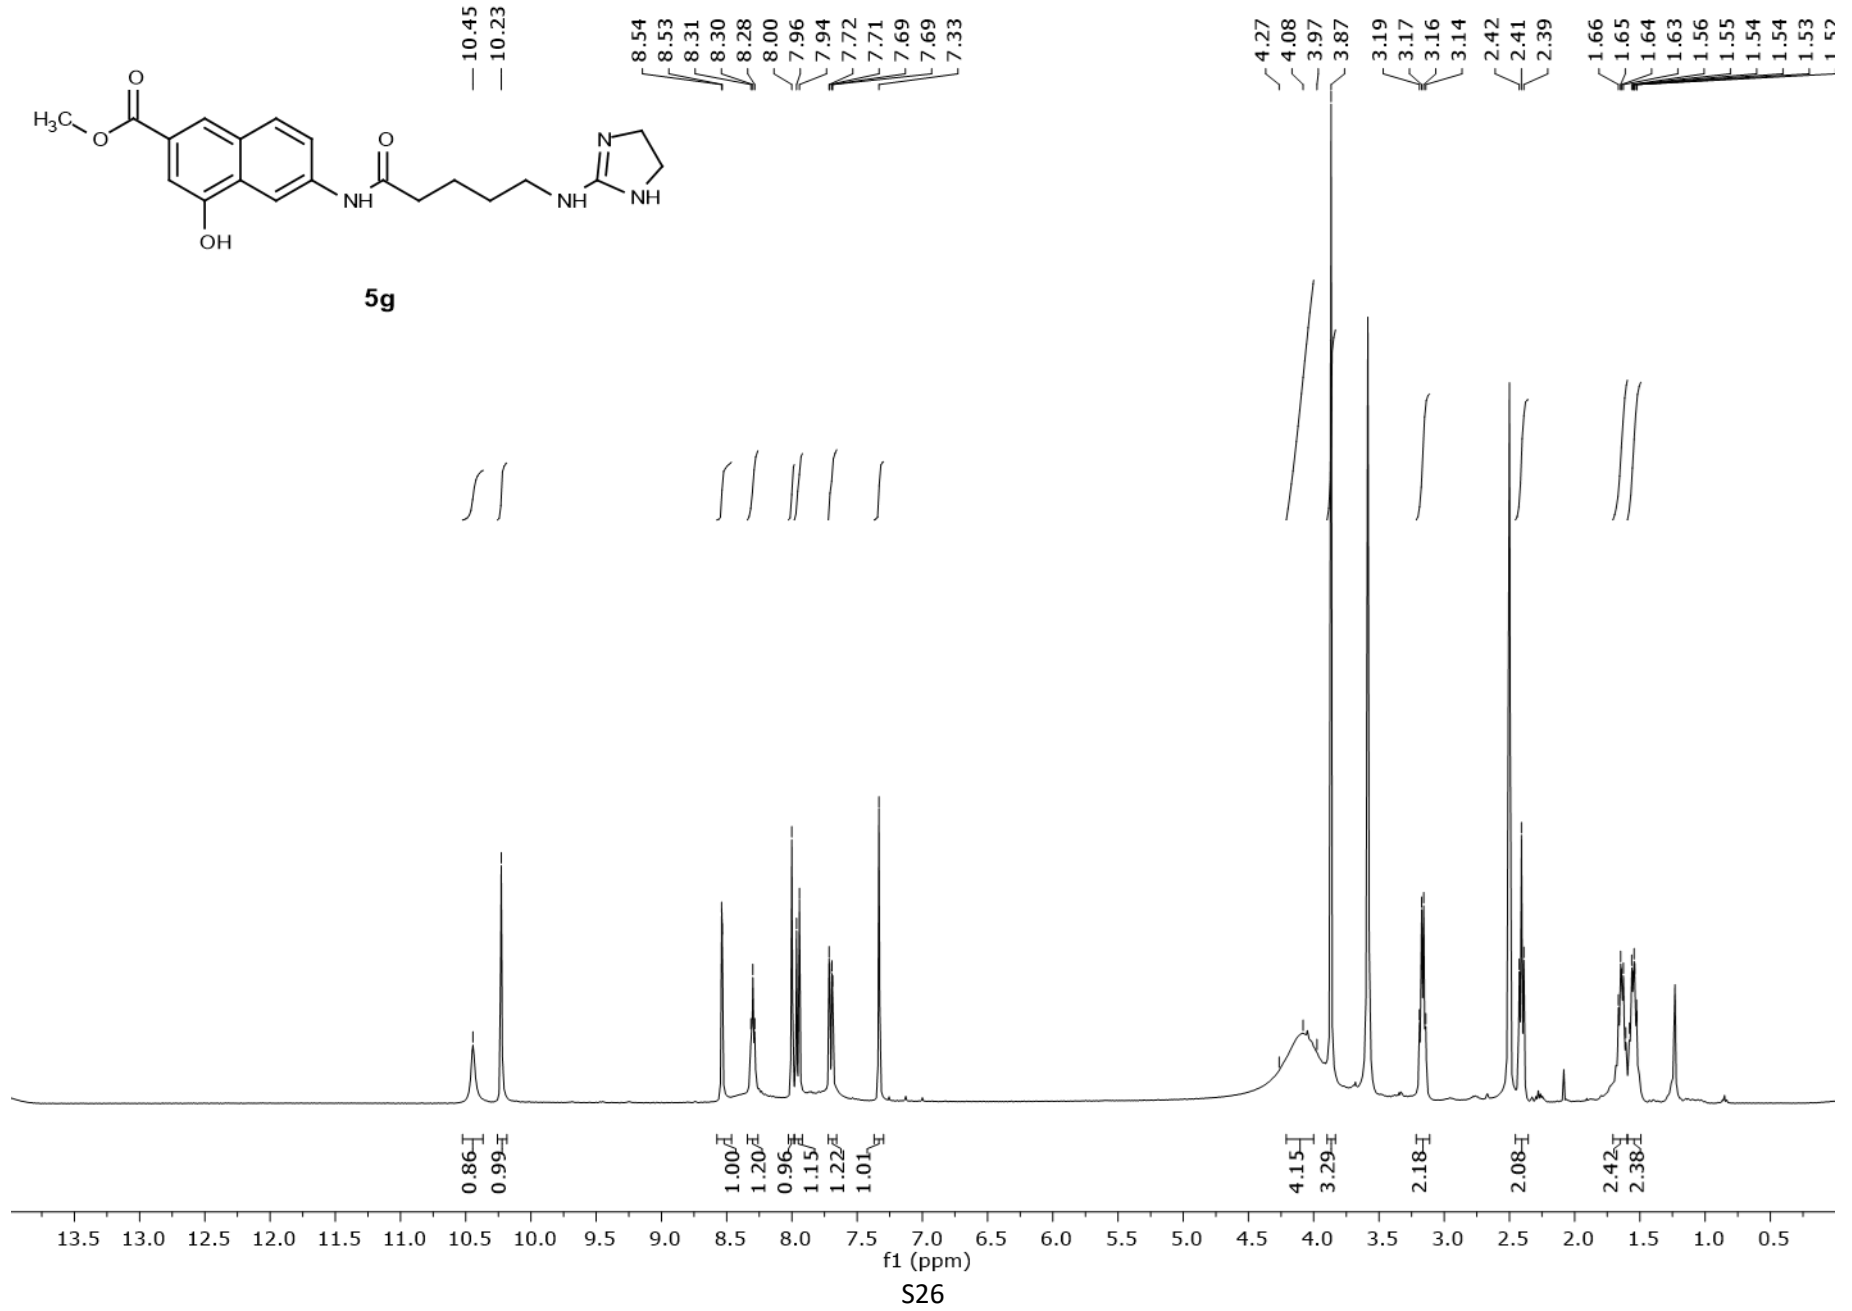

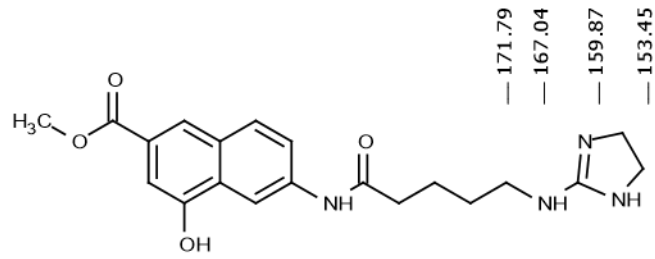

5g

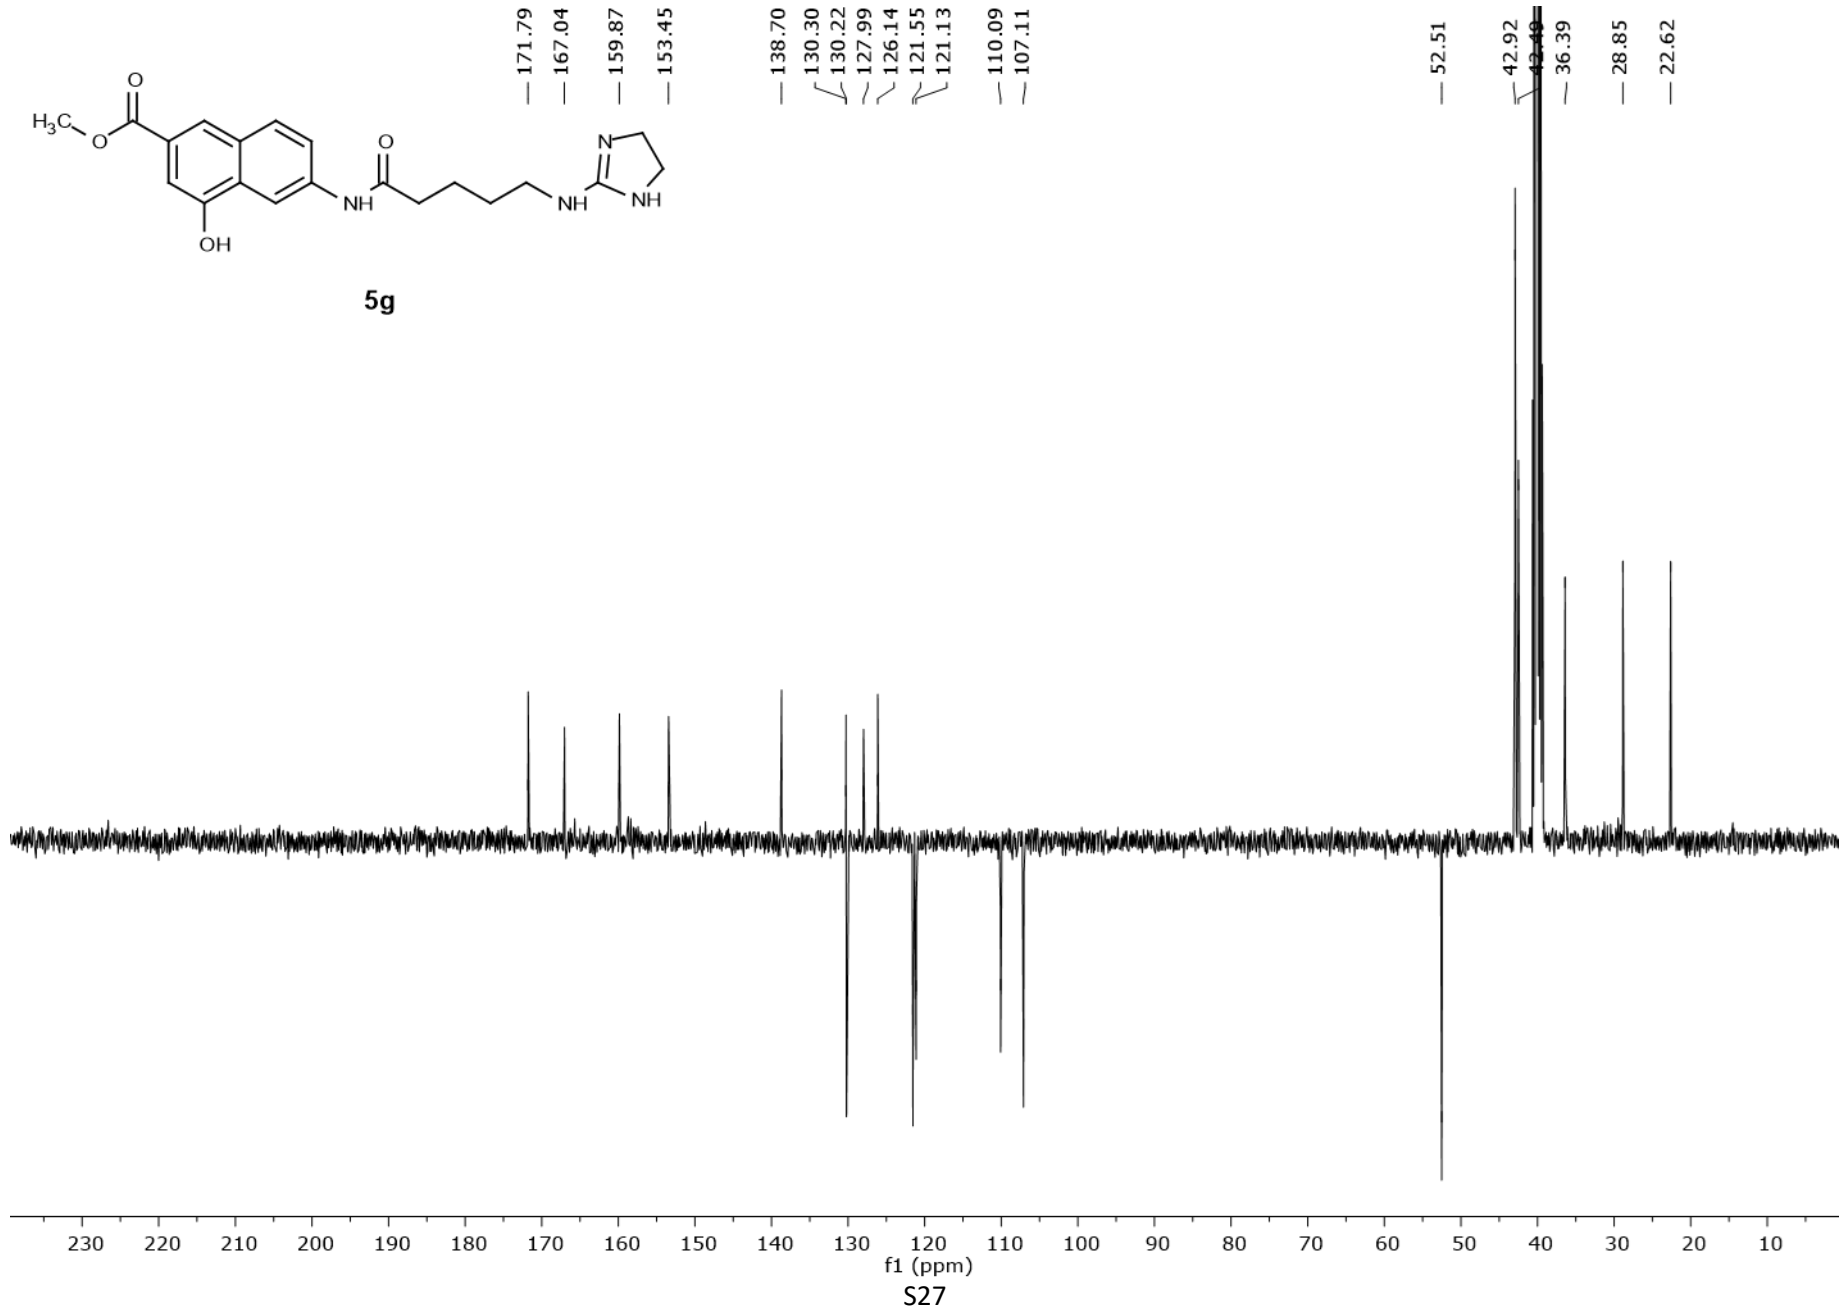

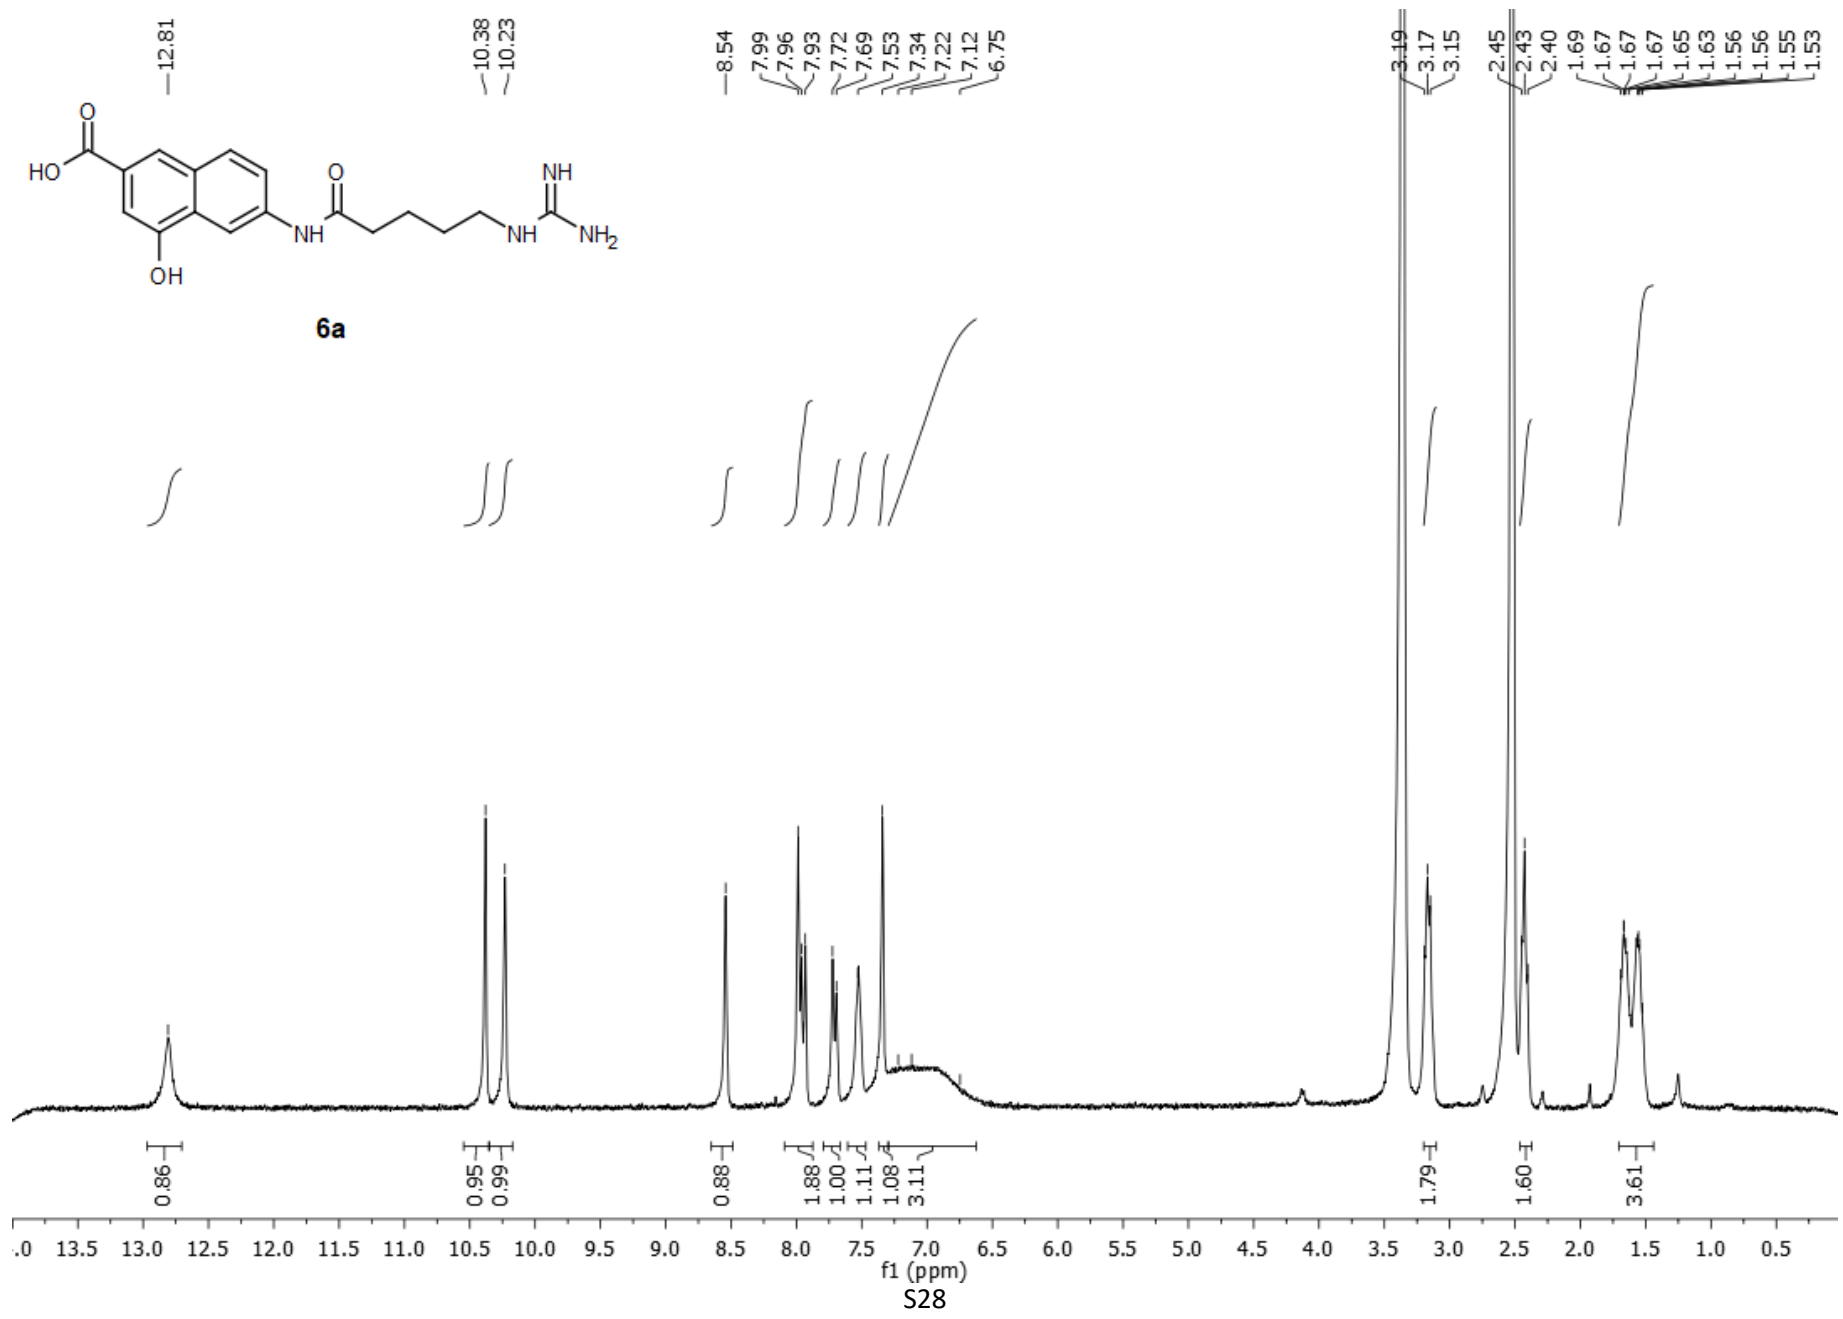



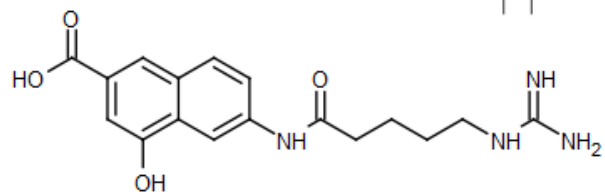

6a

- 171.26
- 167.64
- 156.71
- 152.78
- 137.95
- 129.86
- 129.61
- 127.30
- 121.07
- 120.48
- 109.65
- 107.07

- 40.54
- 35.91
- 28.13
- 22.17

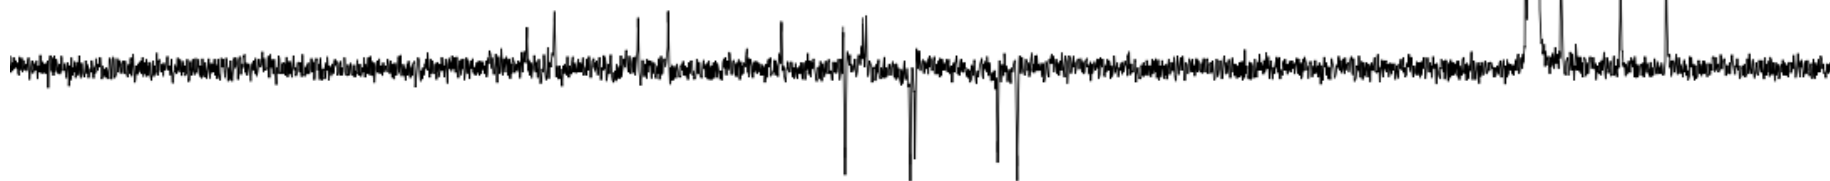

230 220 210 200 190 180 170 160 150 140 130 120 110 100 90 80 70 60 50 40 30 20 10

f1 (ppm)  
S29

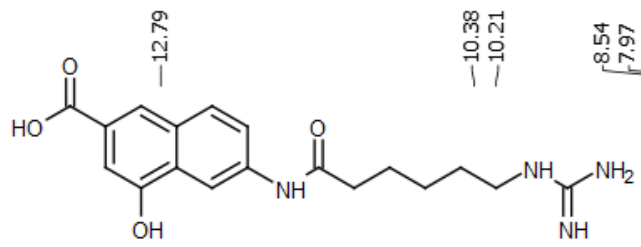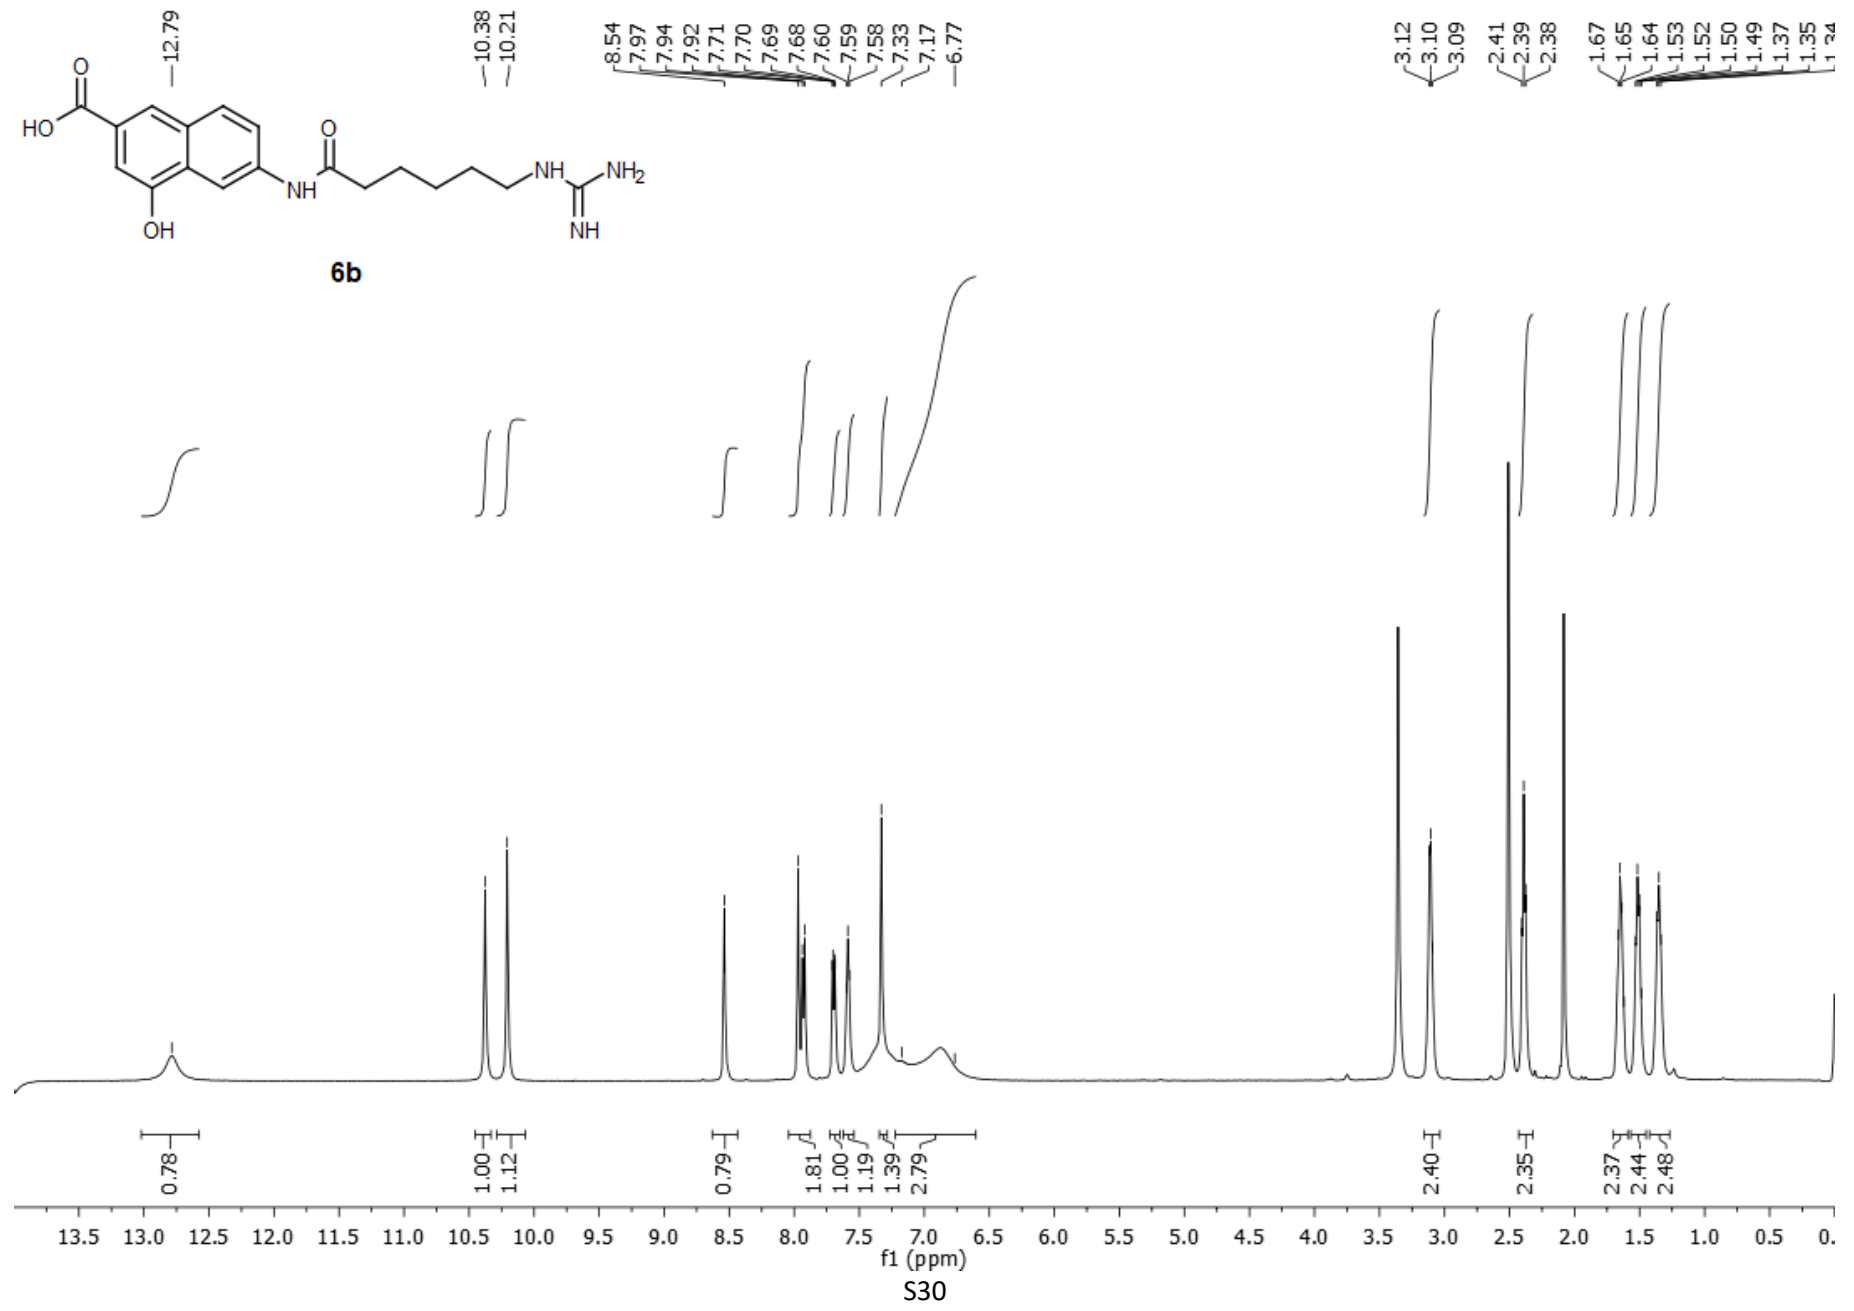

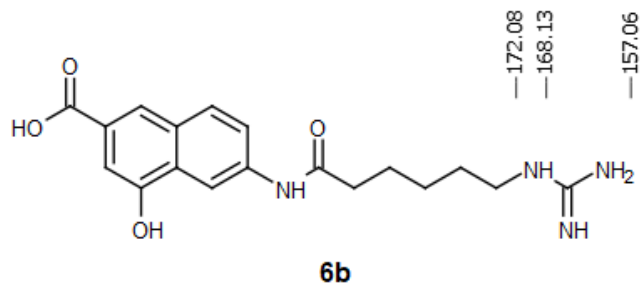

- 172.08
- 168.13
- 157.06
- 153.24
- 138.35
- 130.33
- 130.13
- 127.72
- 127.26
- 121.61
- 120.95
- 110.14
- 107.51

- 41.13
- 36.74
- 28.76
- 26.18
- 25.13

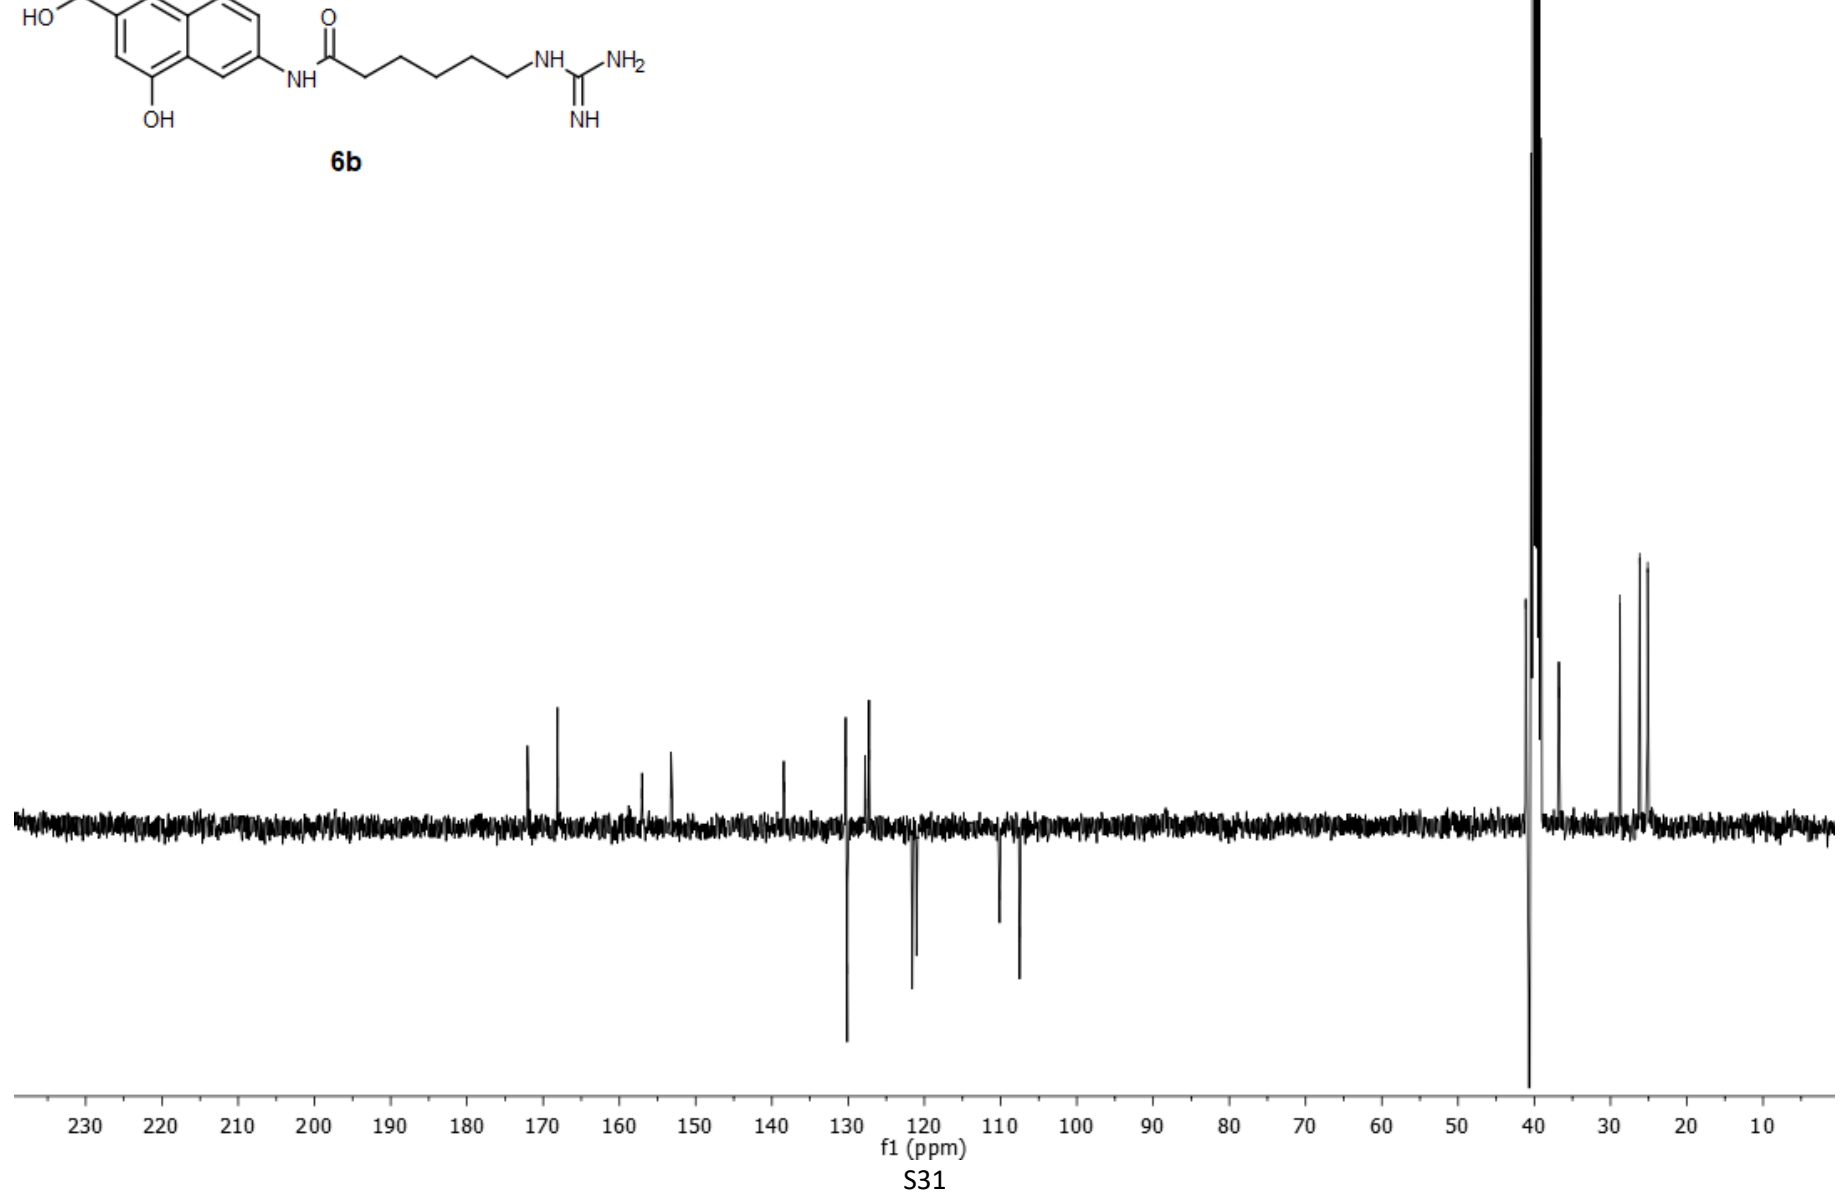

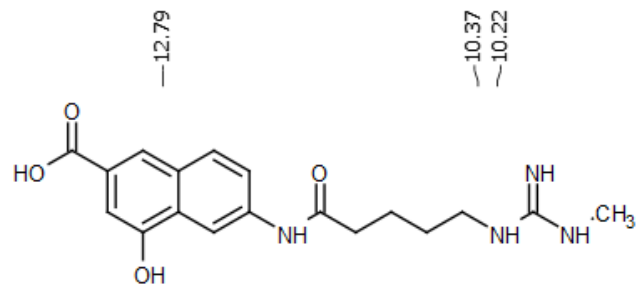

**6c**

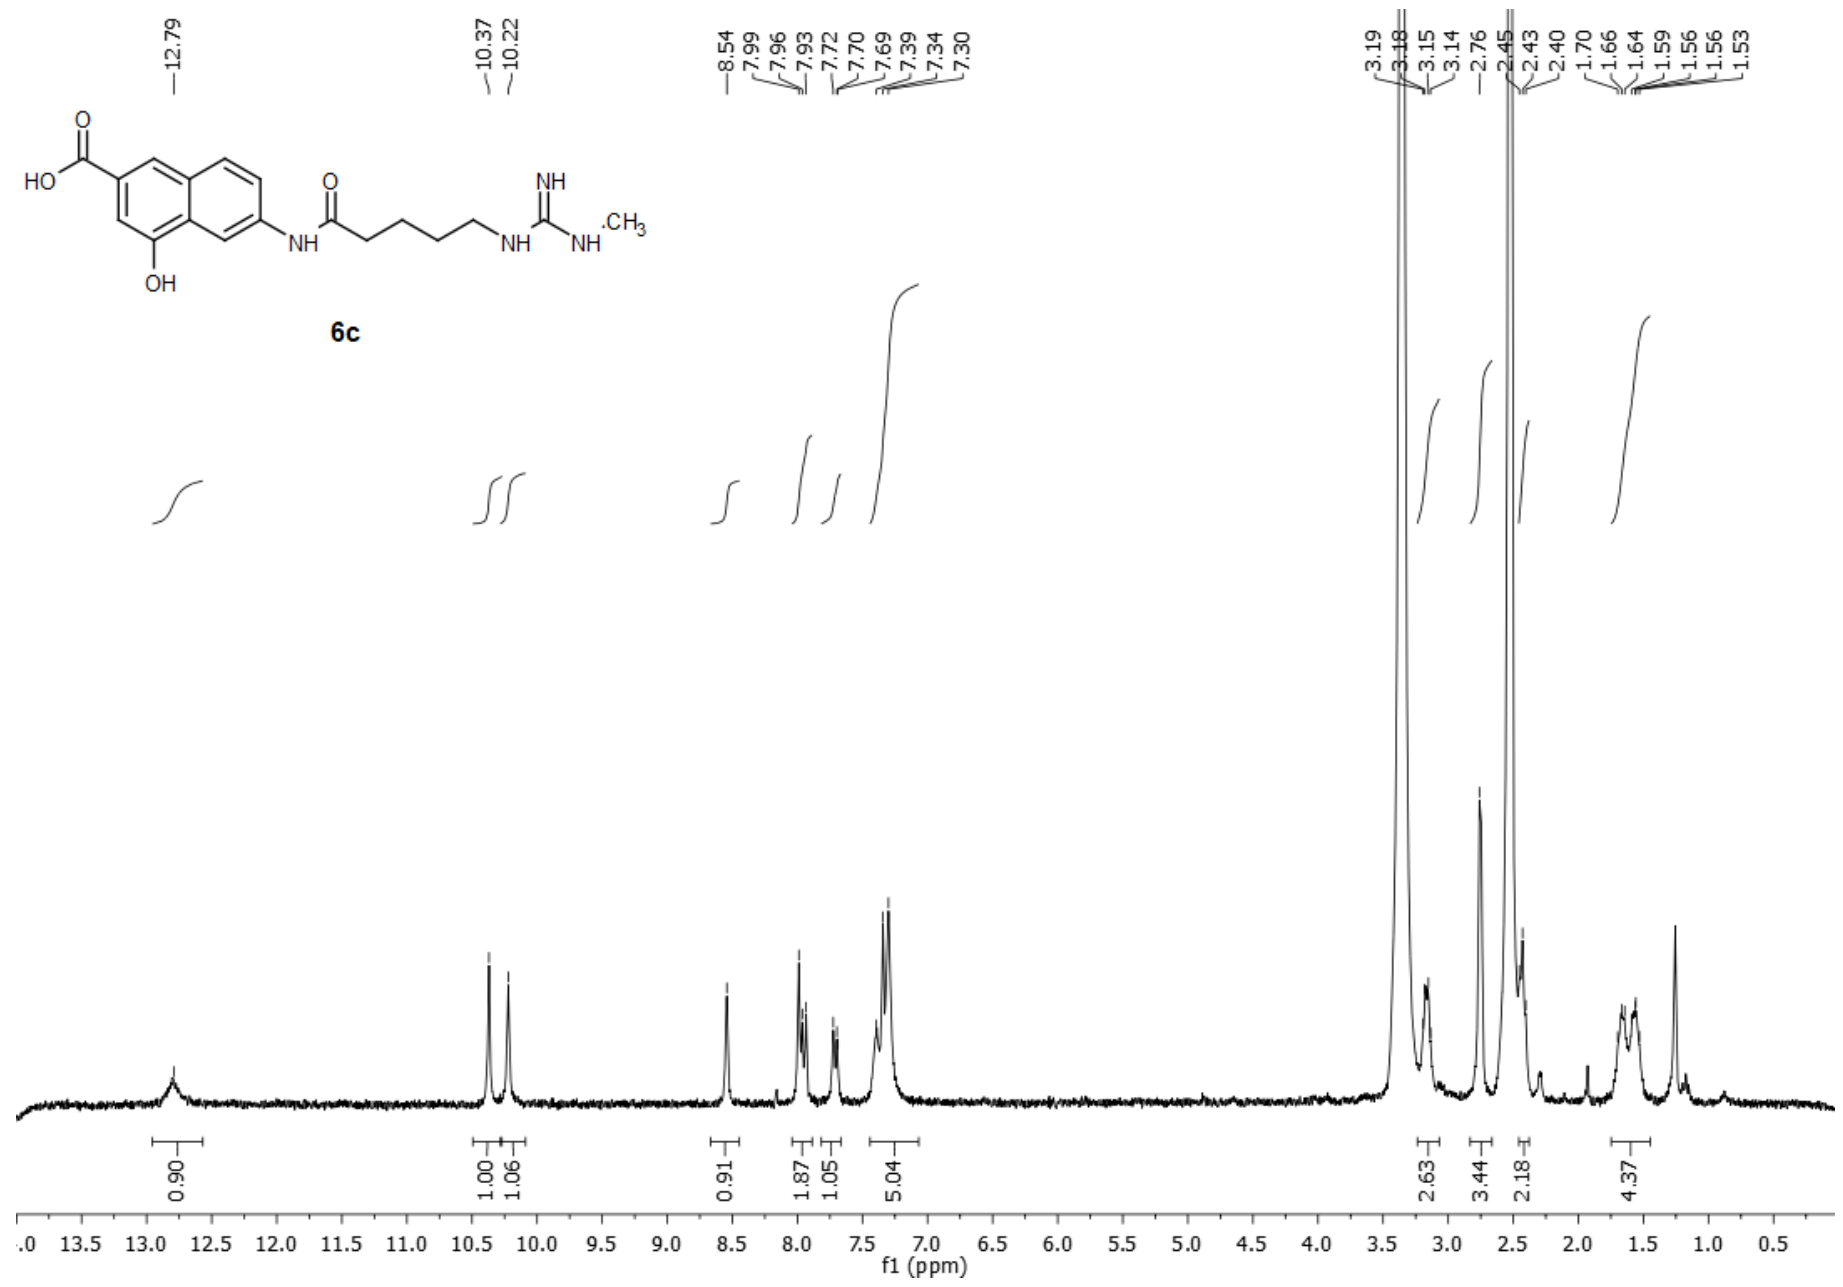

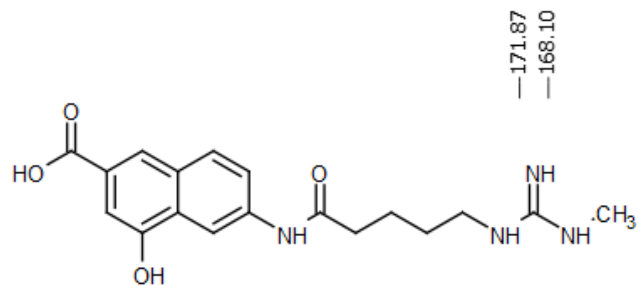

6c

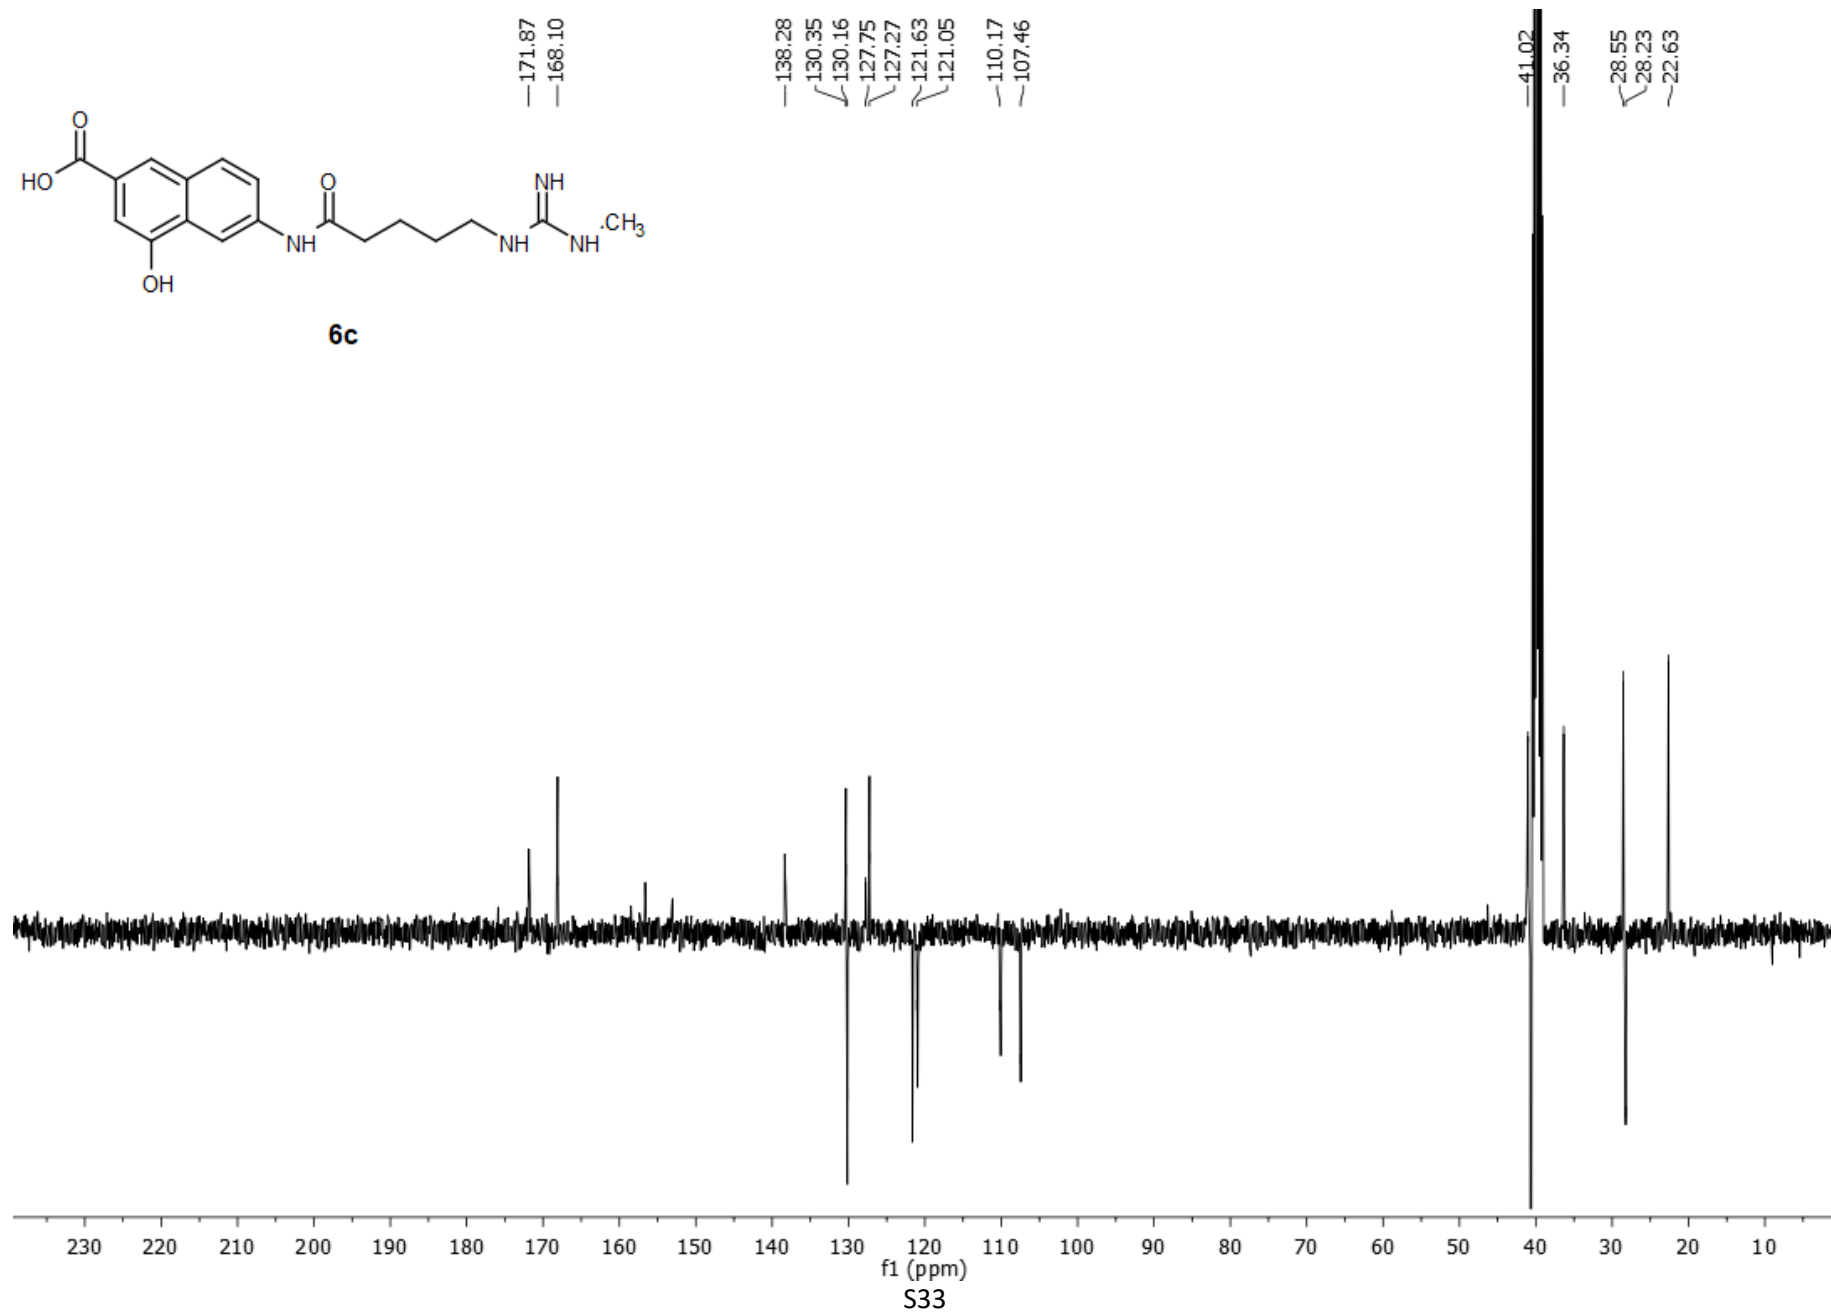

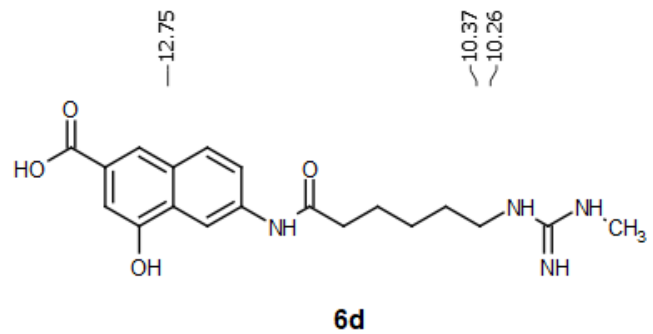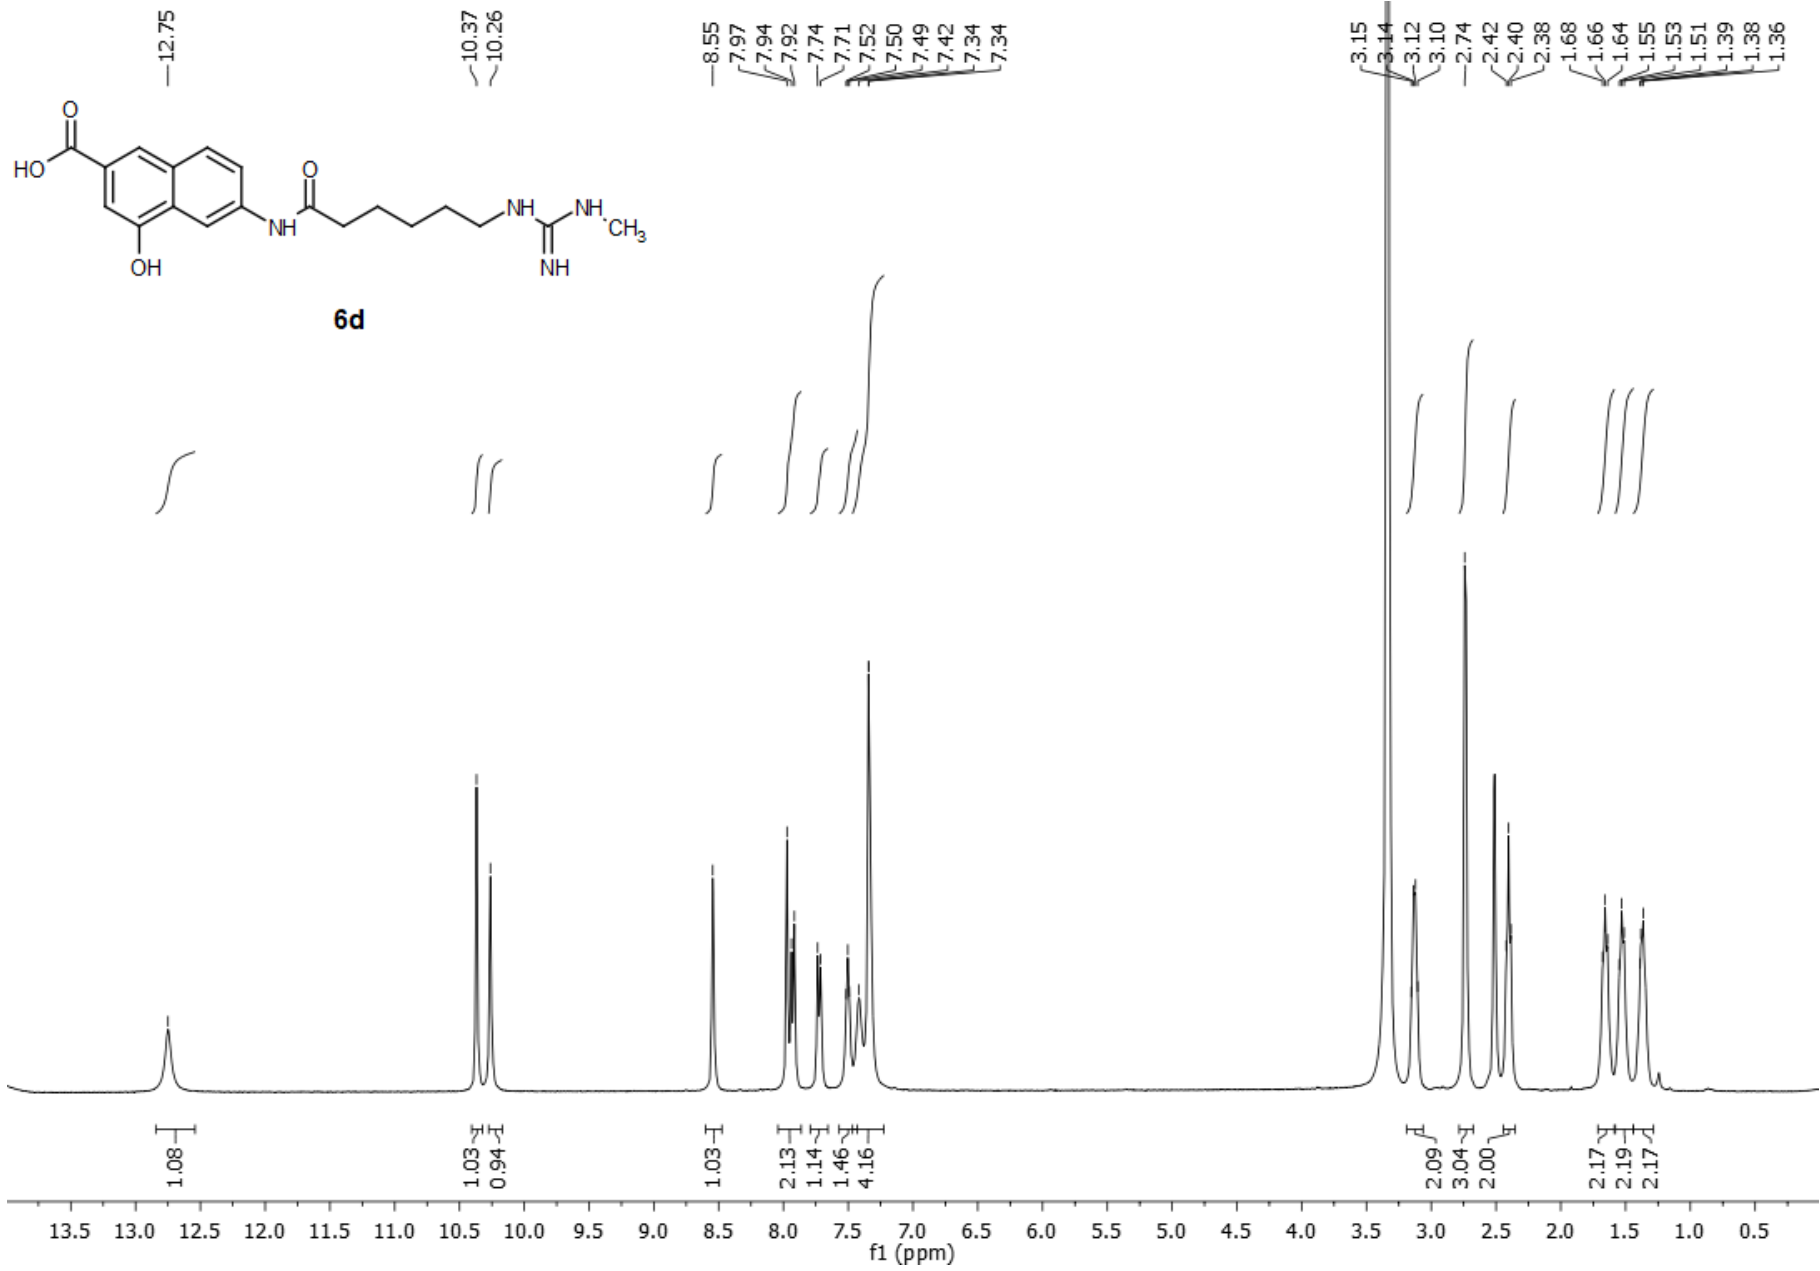

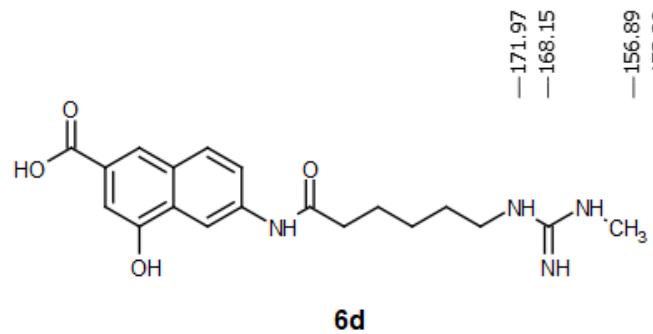

- 171.97
- 168.15
- 156.89
- 153.29
- 138.55
- 130.31
- 130.03
- 127.82
- 127.29
- 121.54
- 121.01
- 110.11
- 107.56

- 41.20
- 36.82
- 28.84
- 28.38
- 26.21
- 25.17

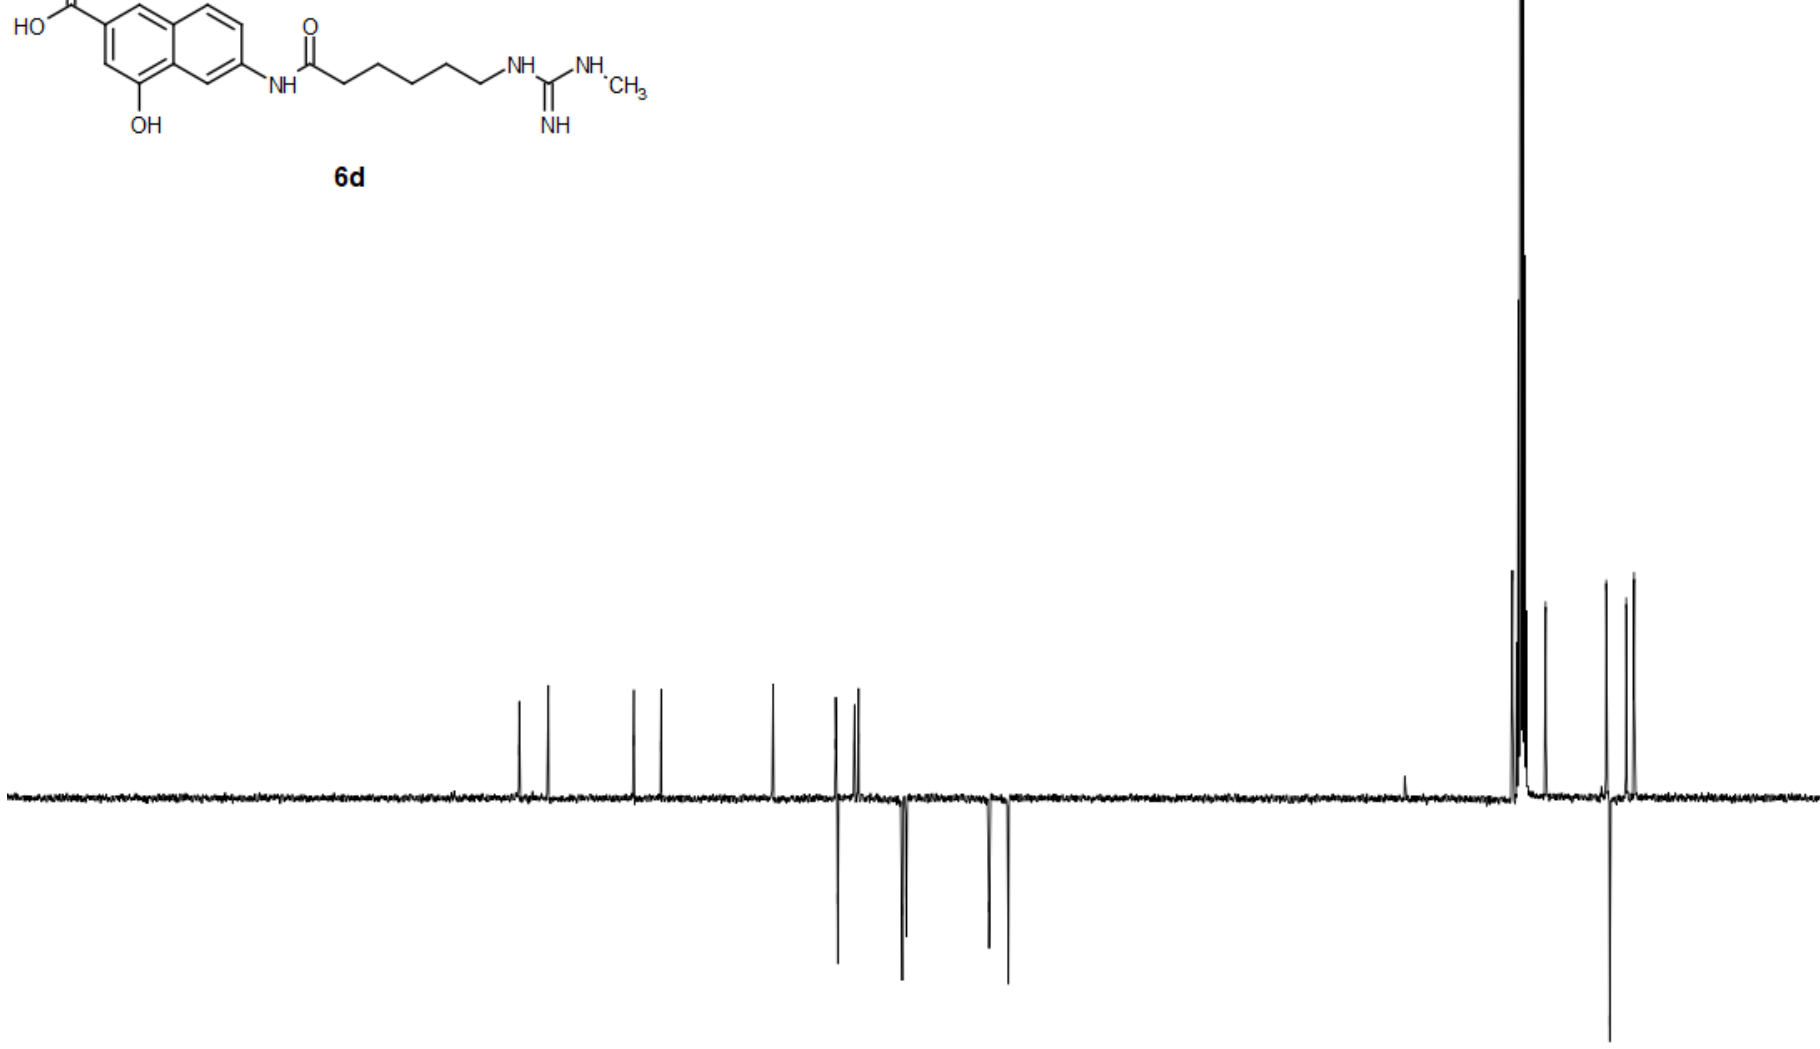

230 220 210 200 190 180 170 160 150 140 130 120 110 100 90 80 70 60 50 40 30 20 10

f1 (ppm)  
S35

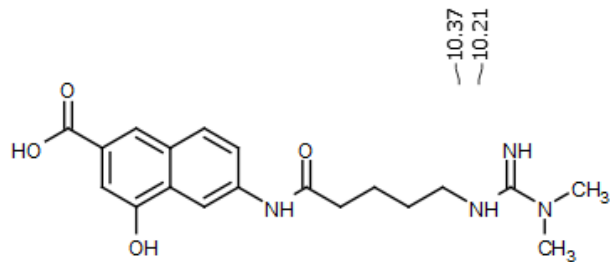

**6e**

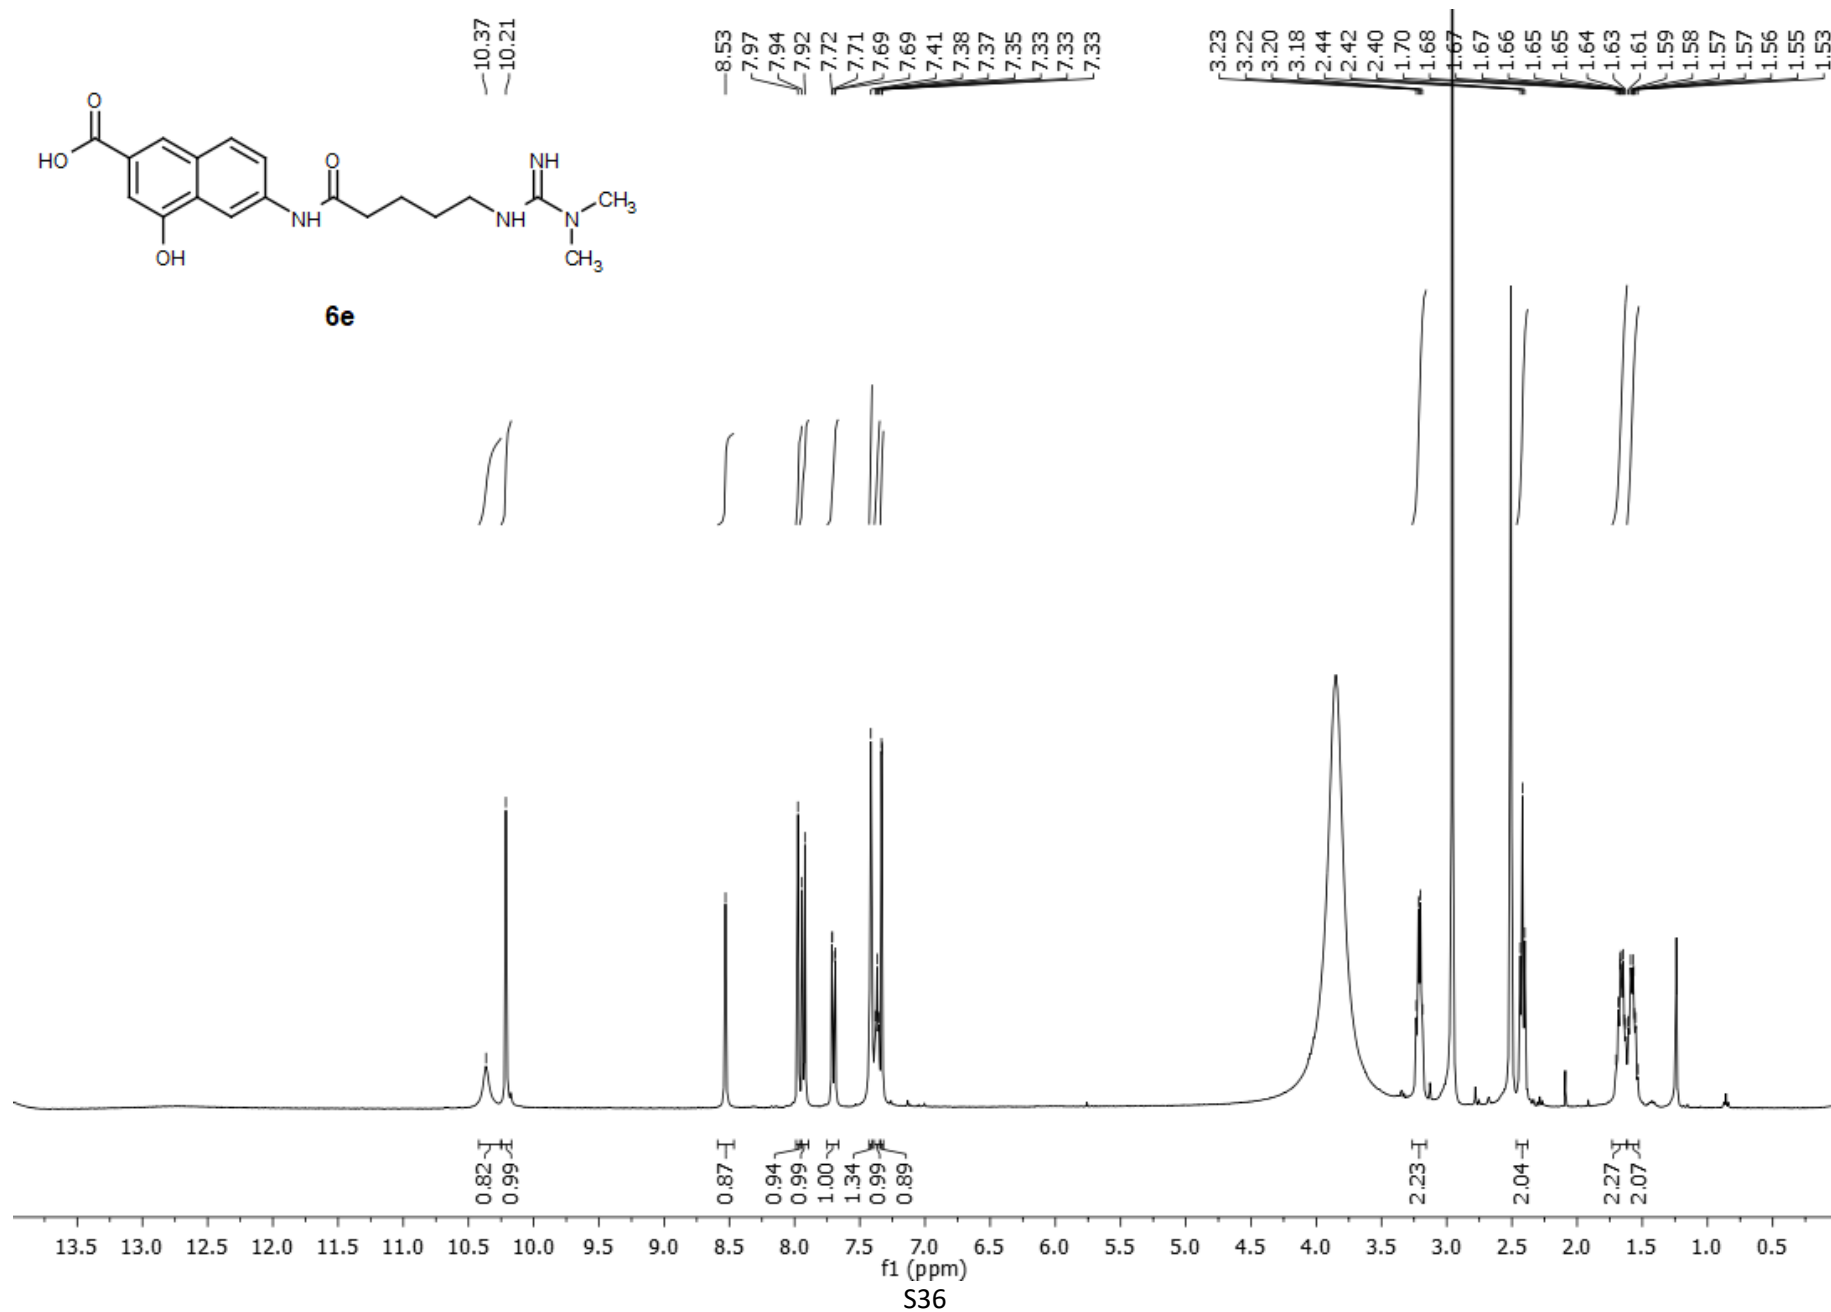



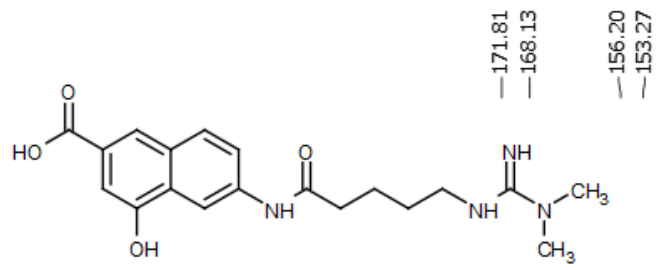

6e

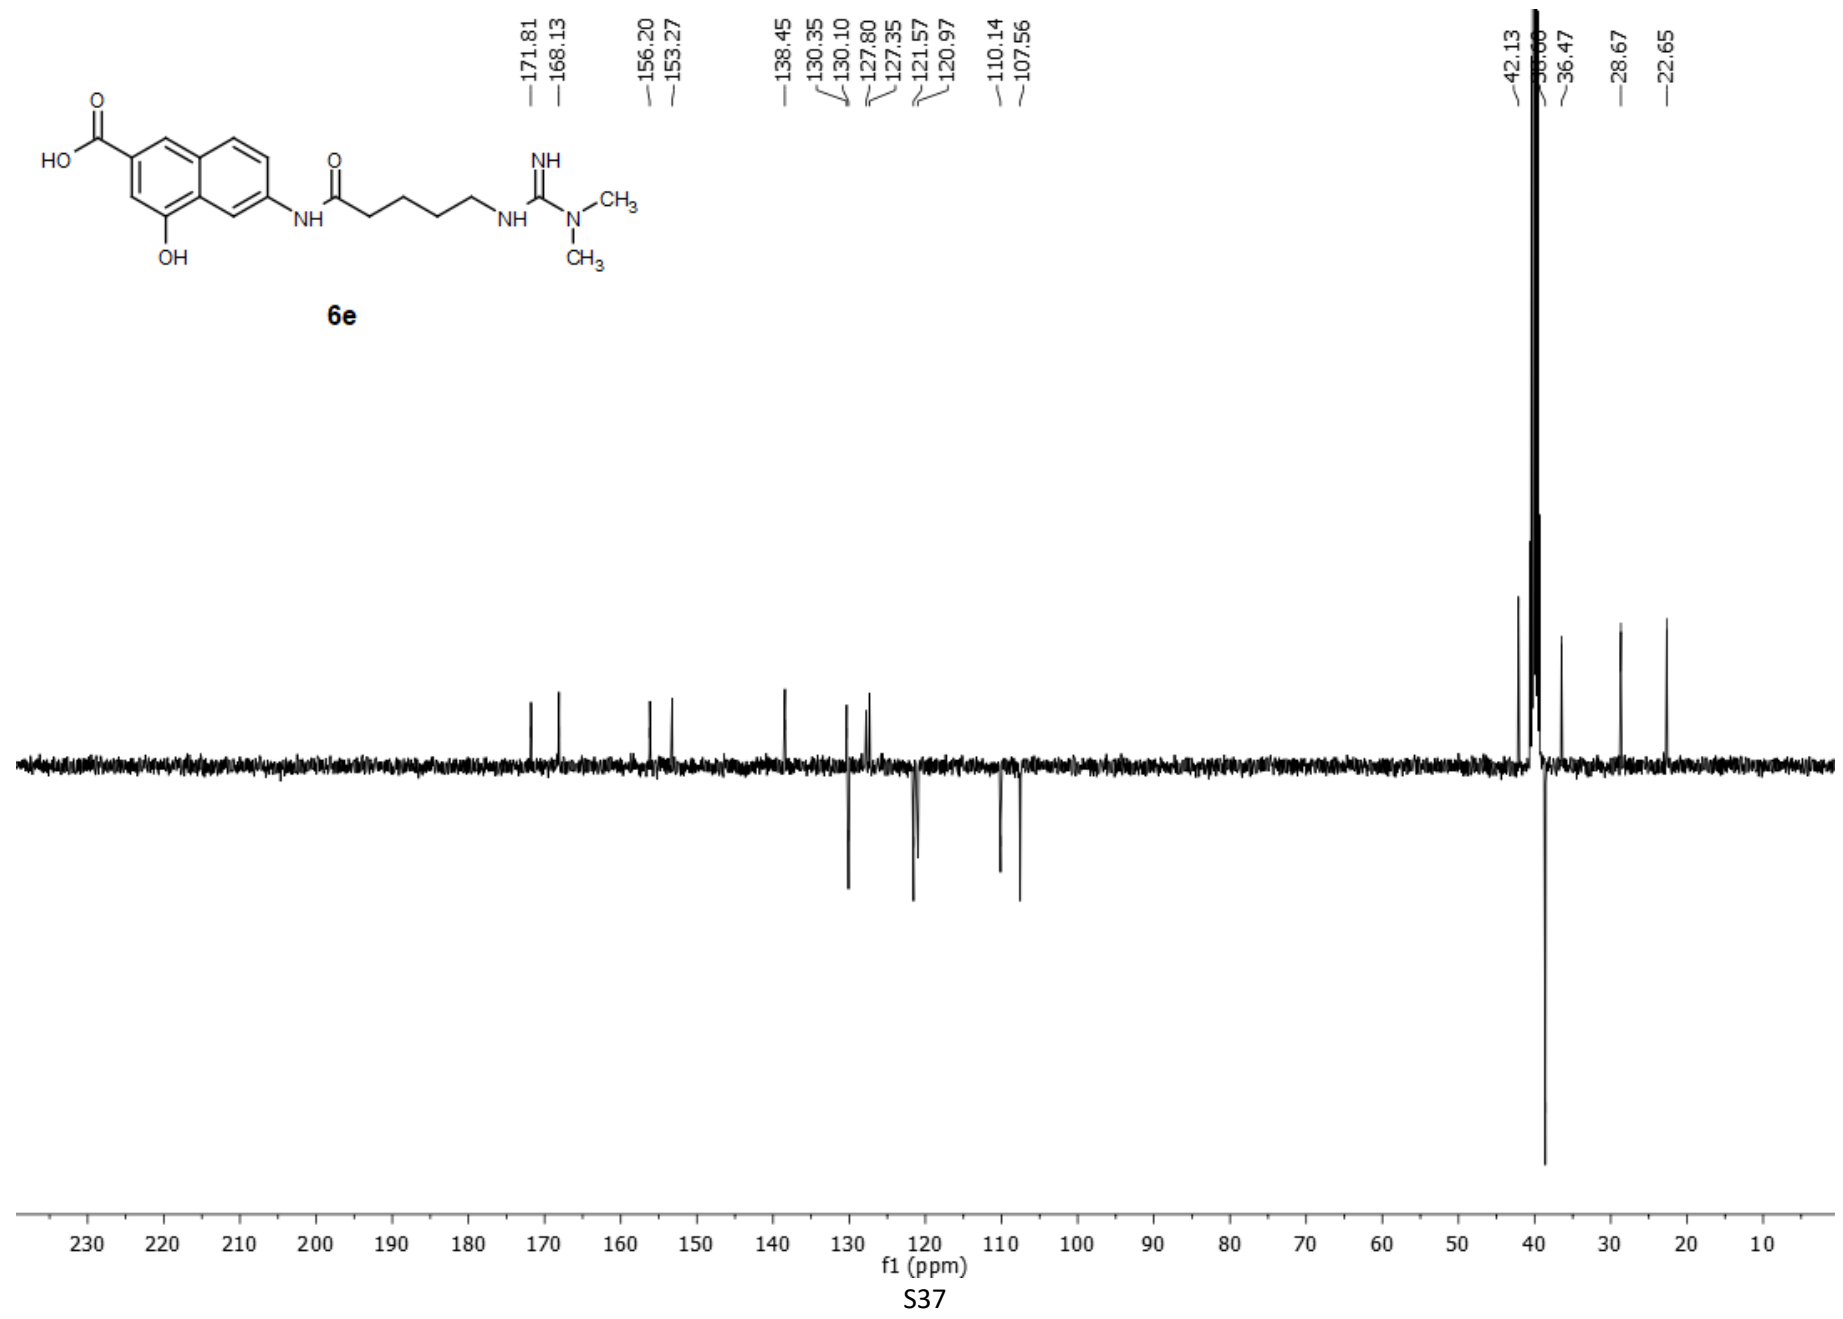

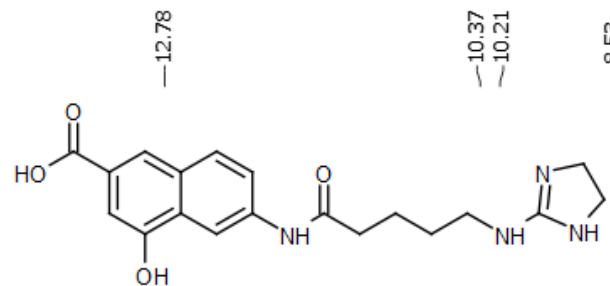

**6f**

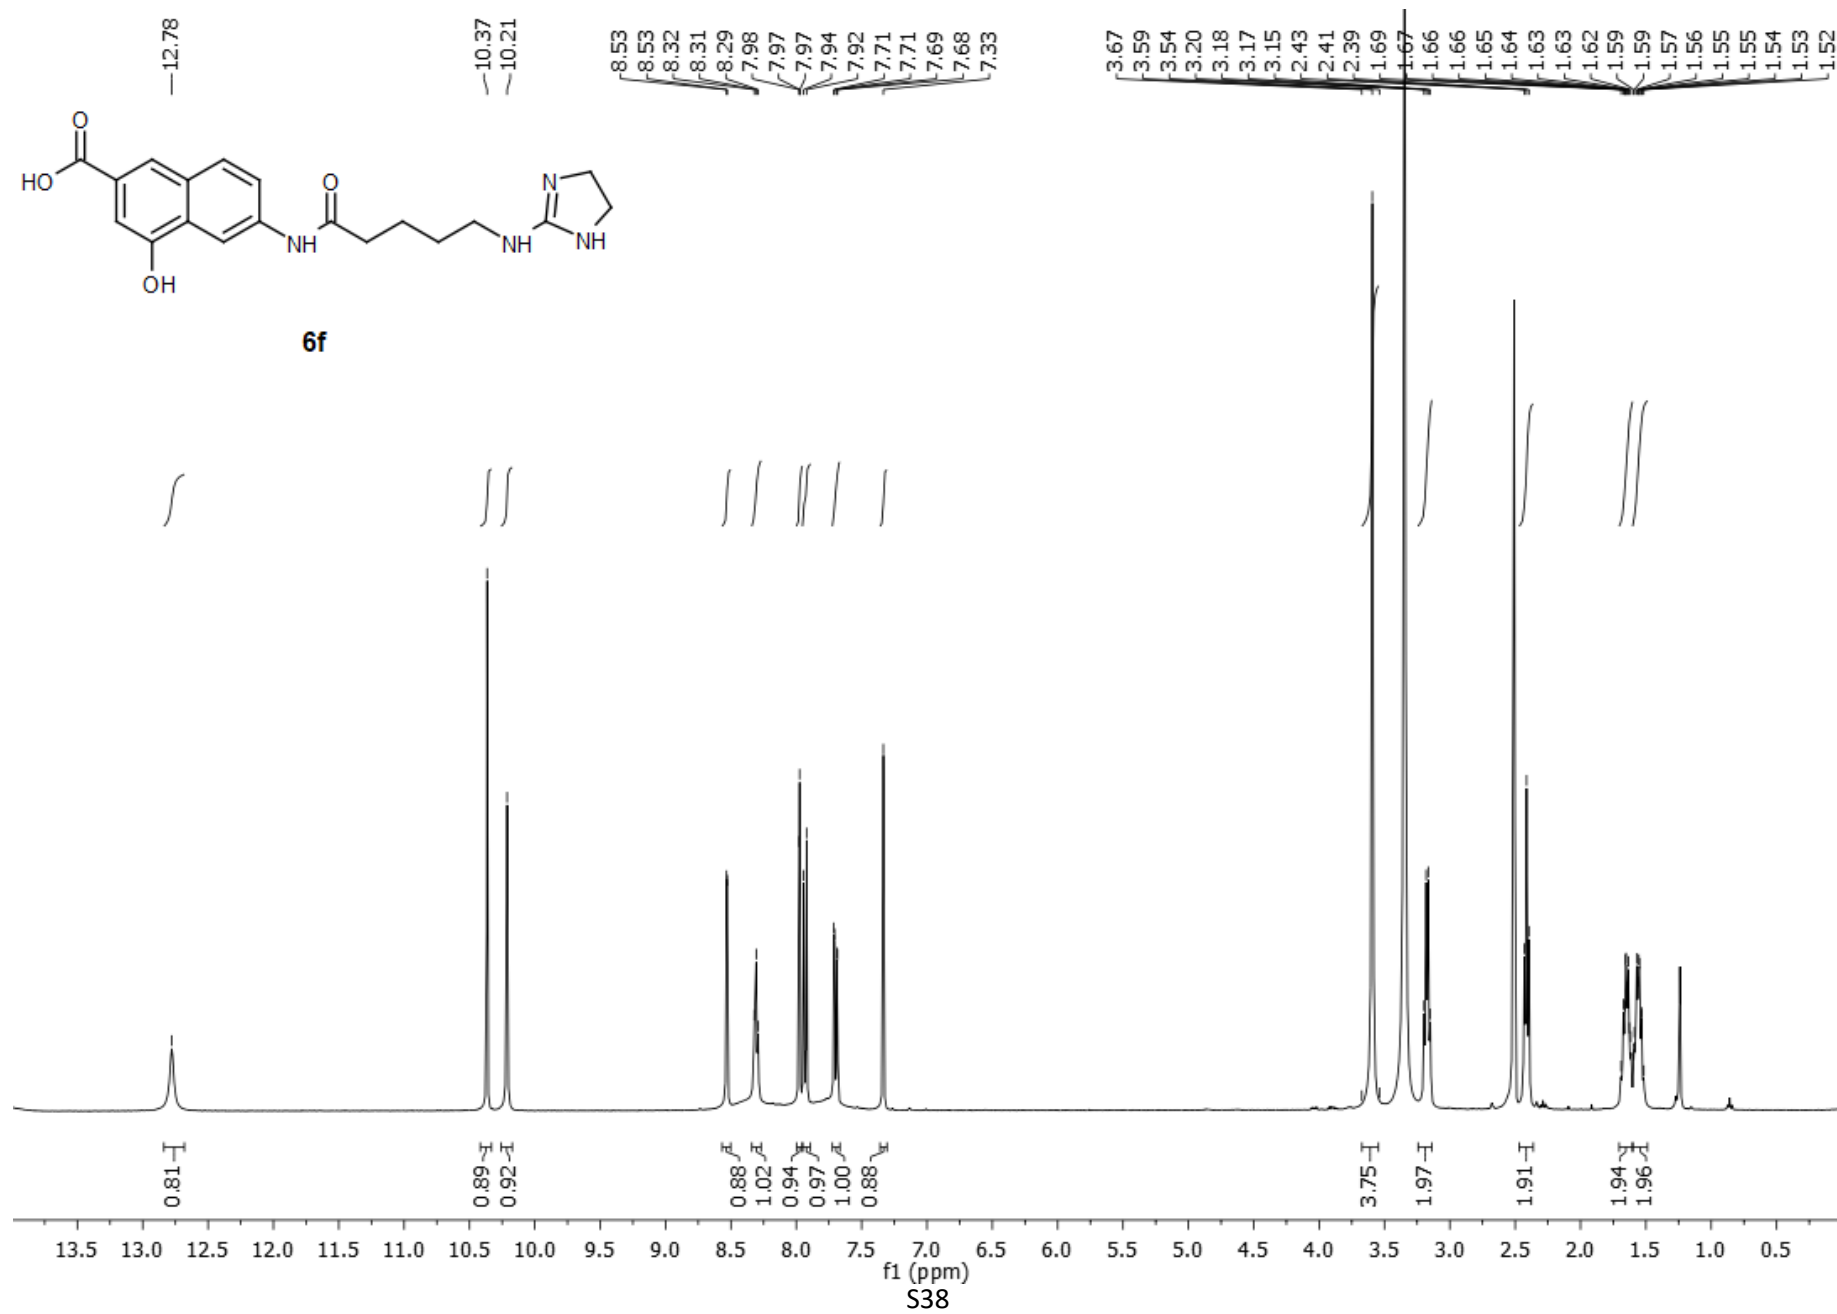

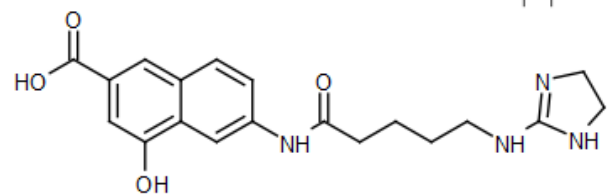

6f

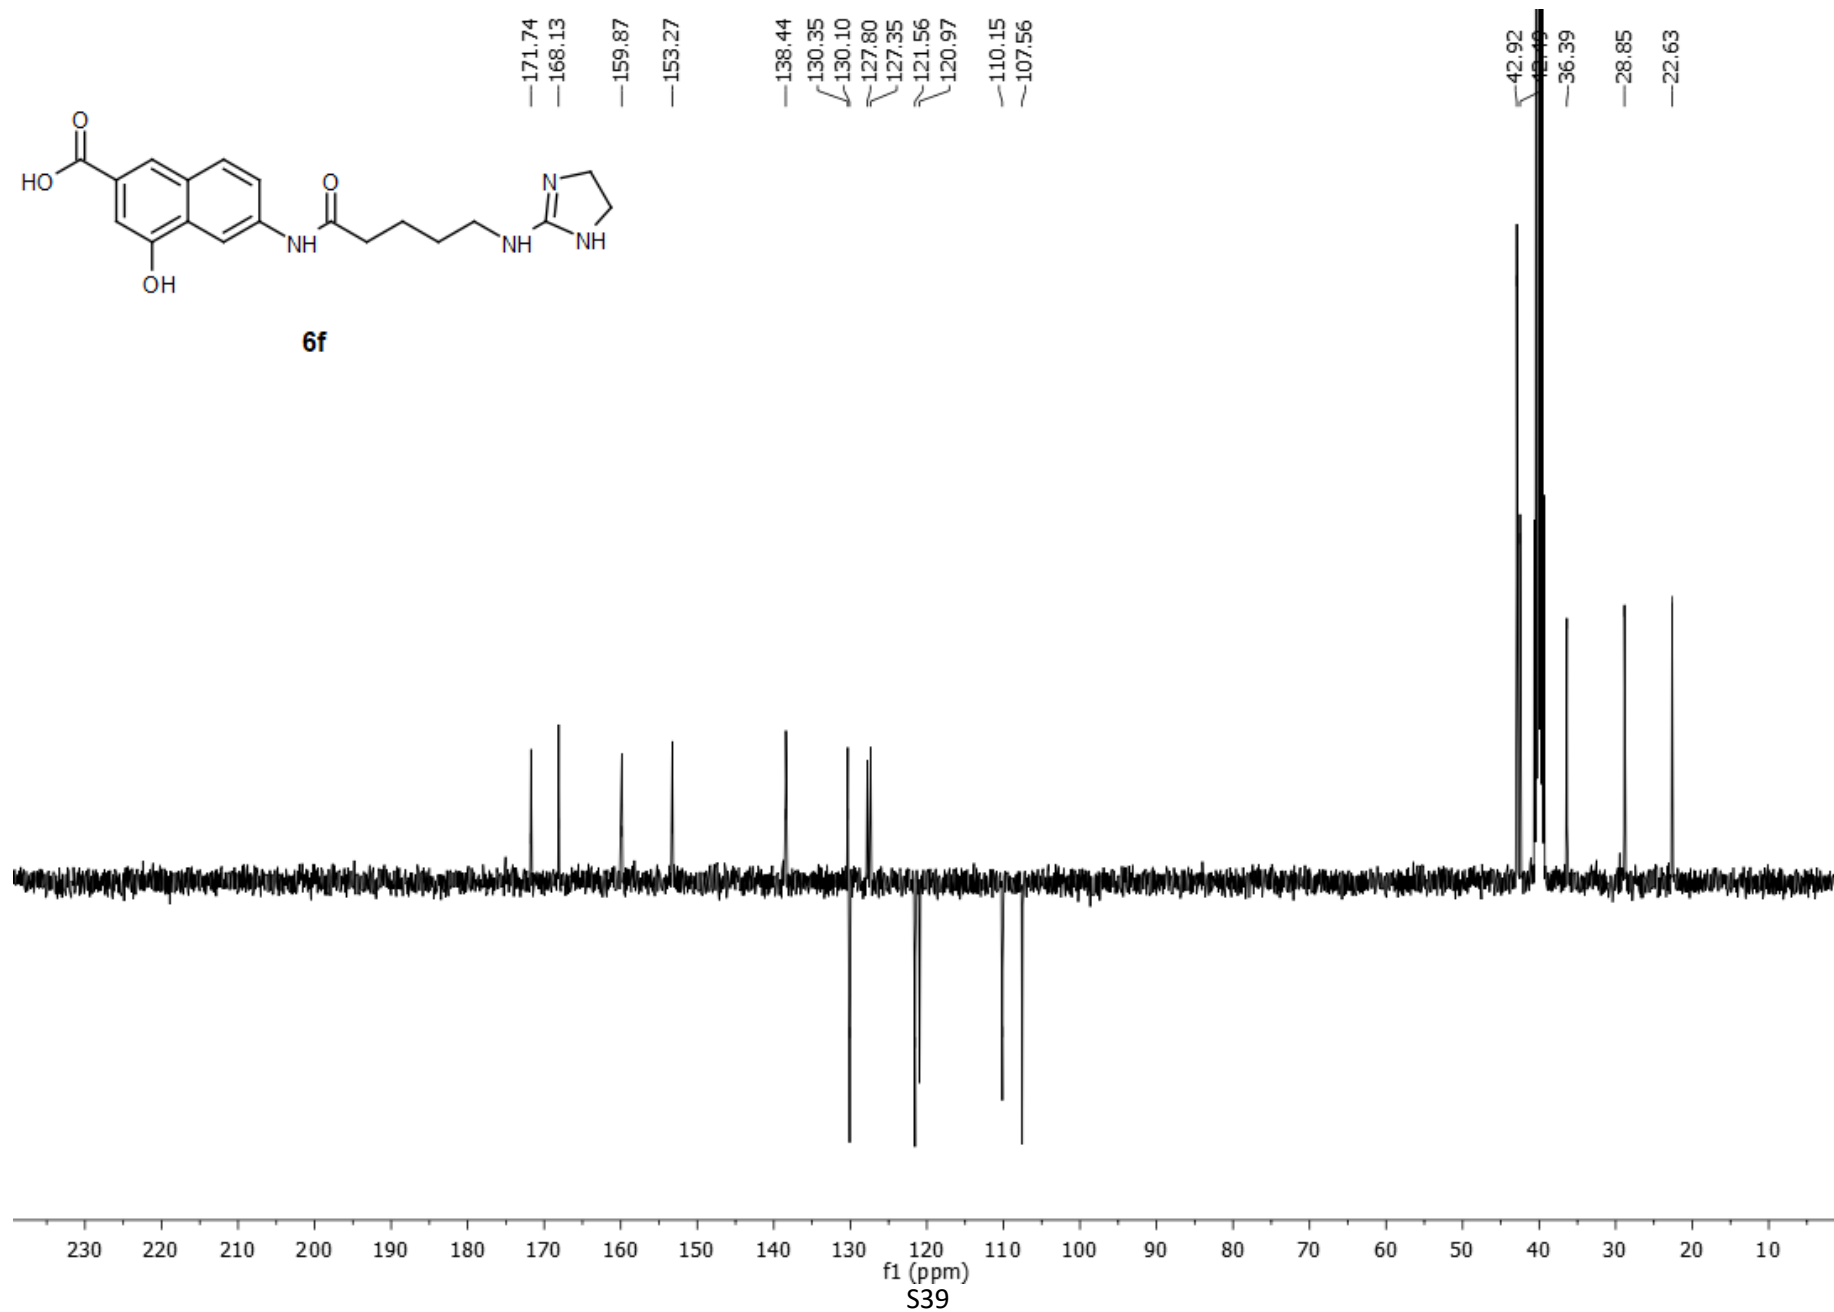

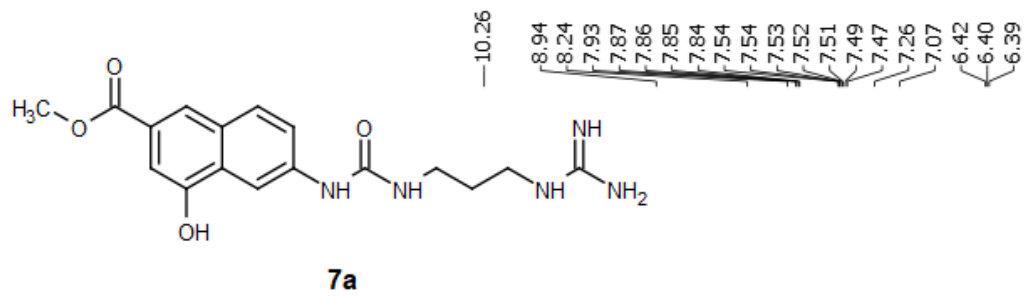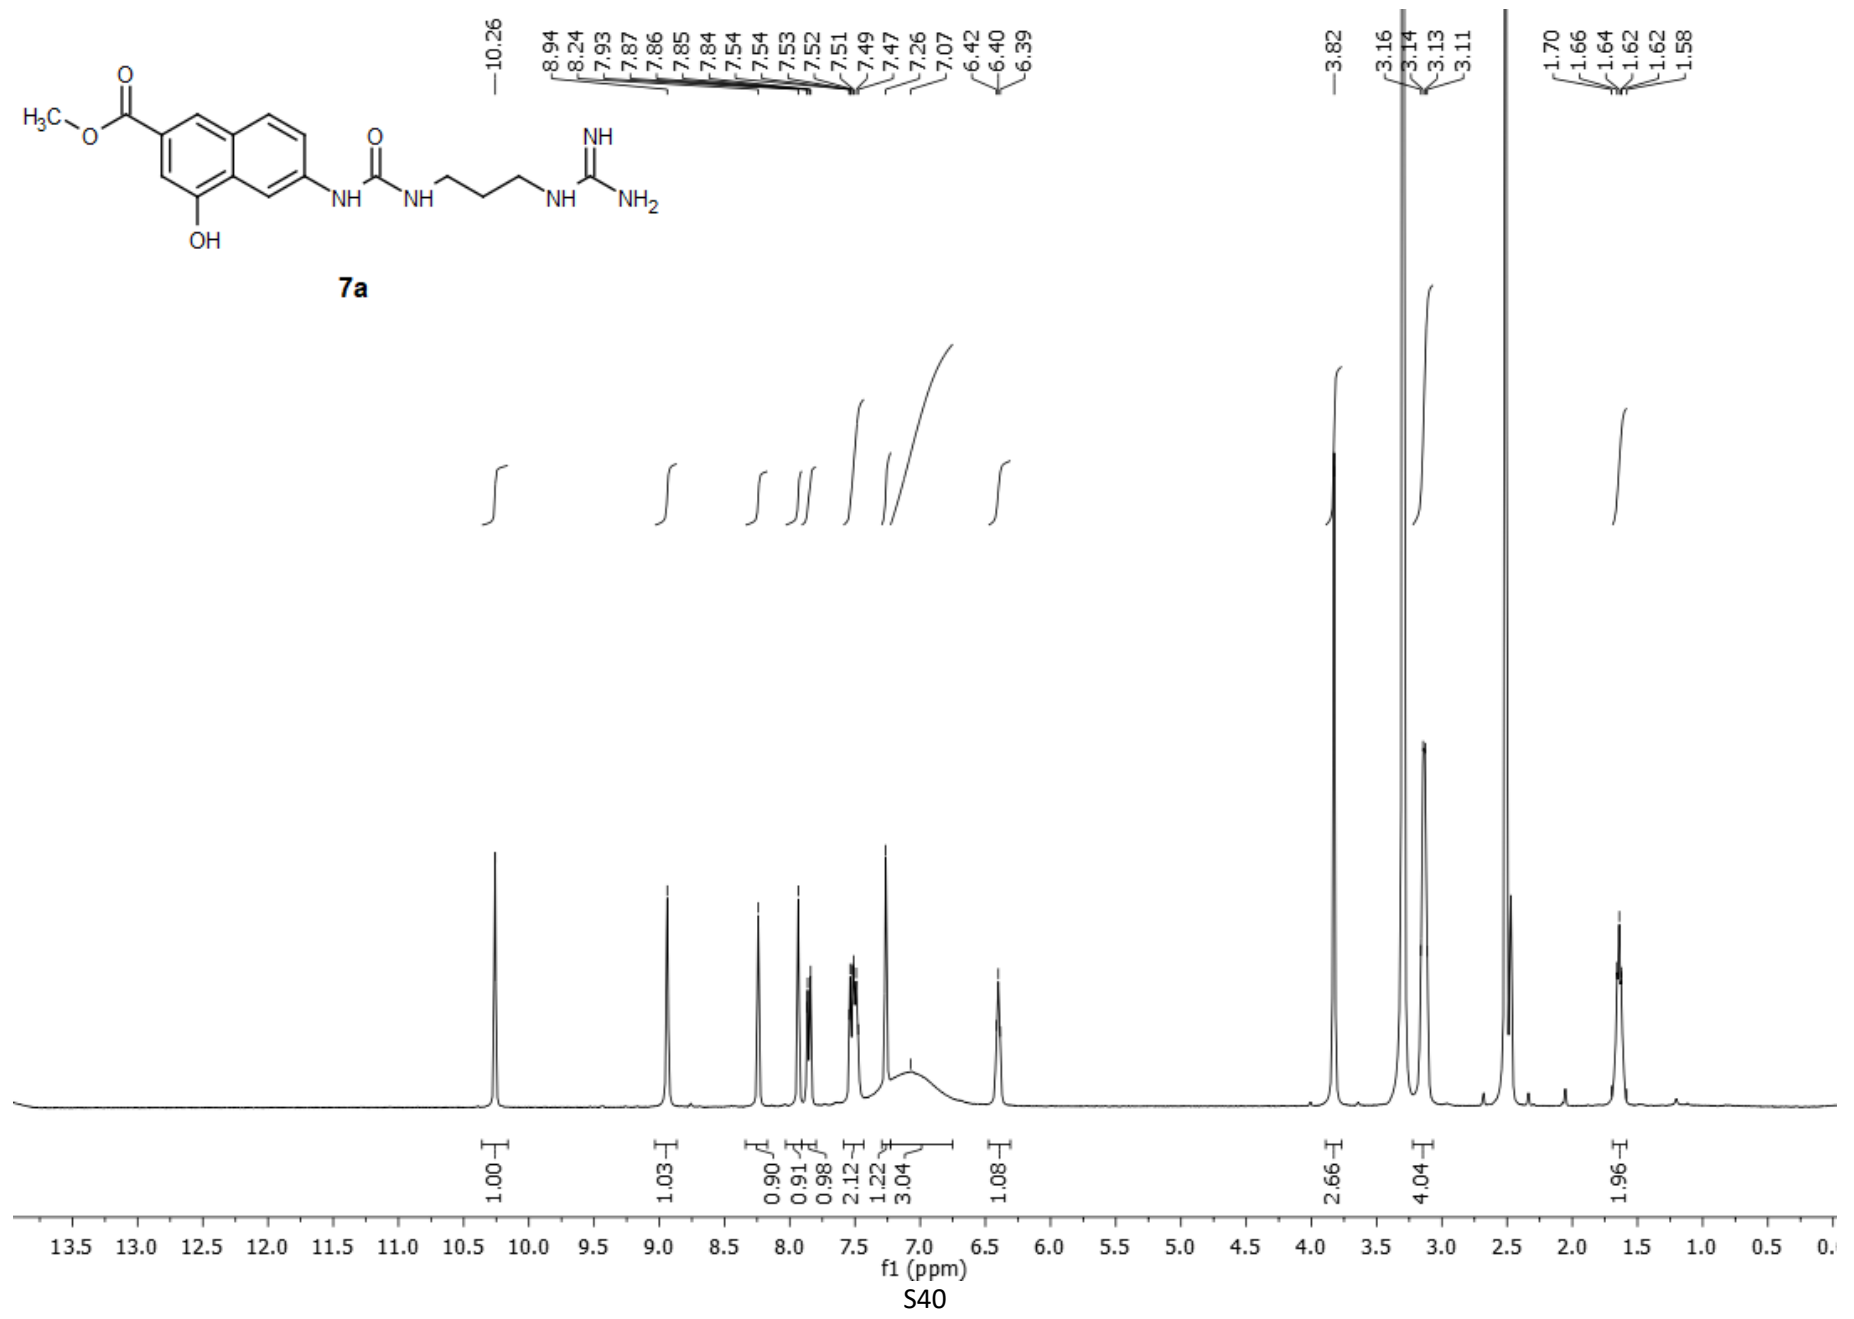

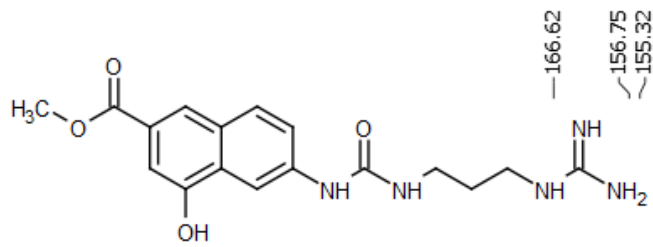

7a

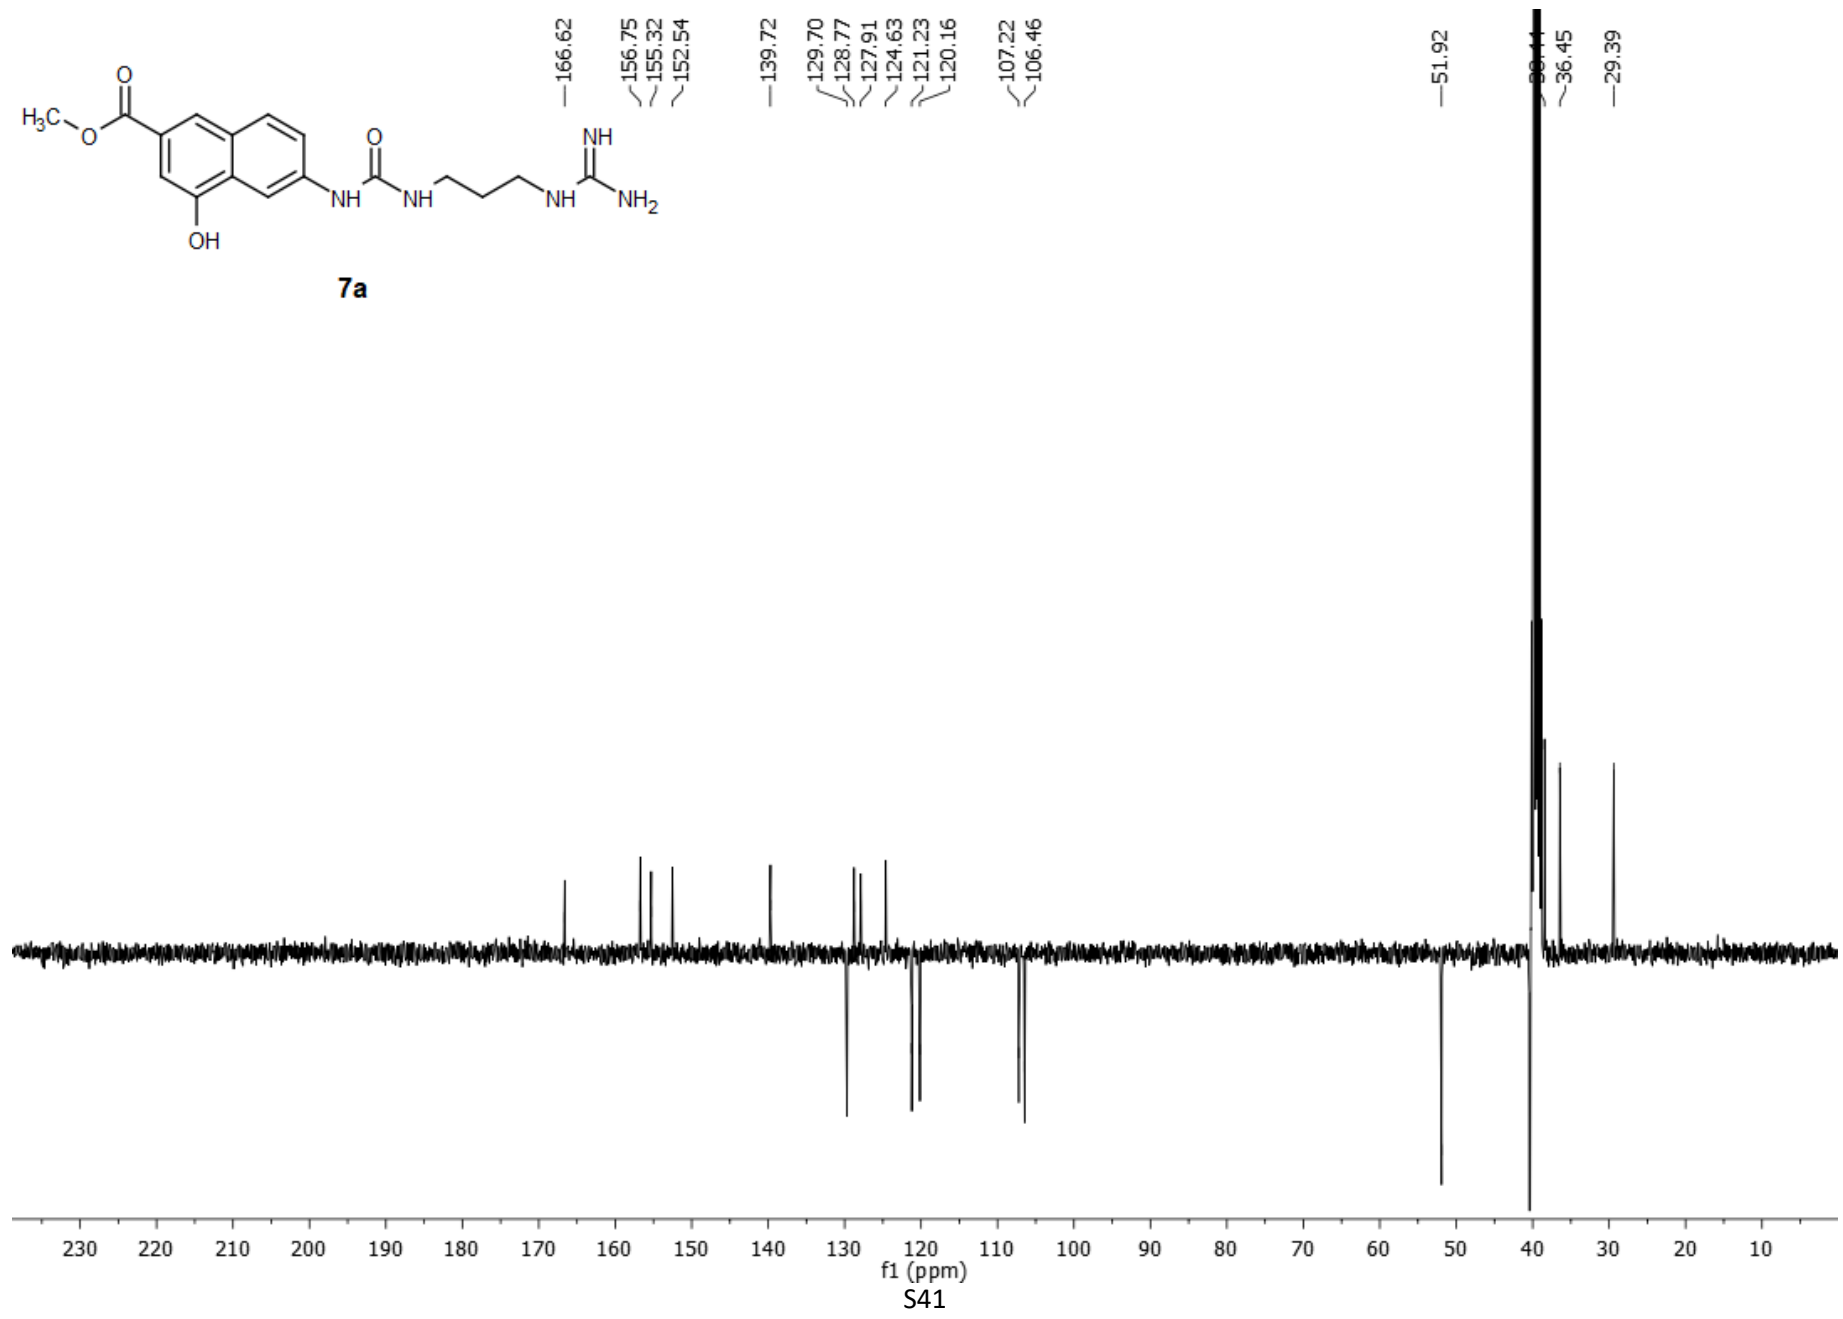

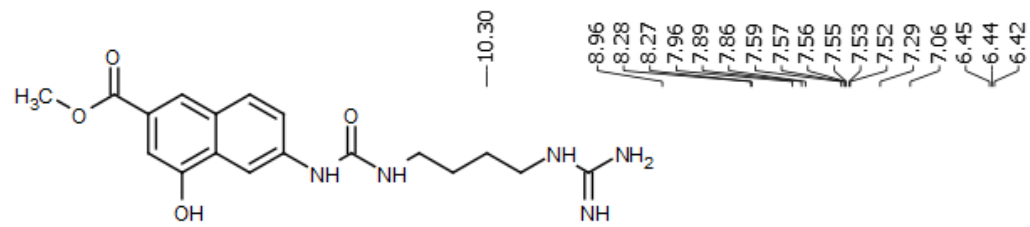

**7b**

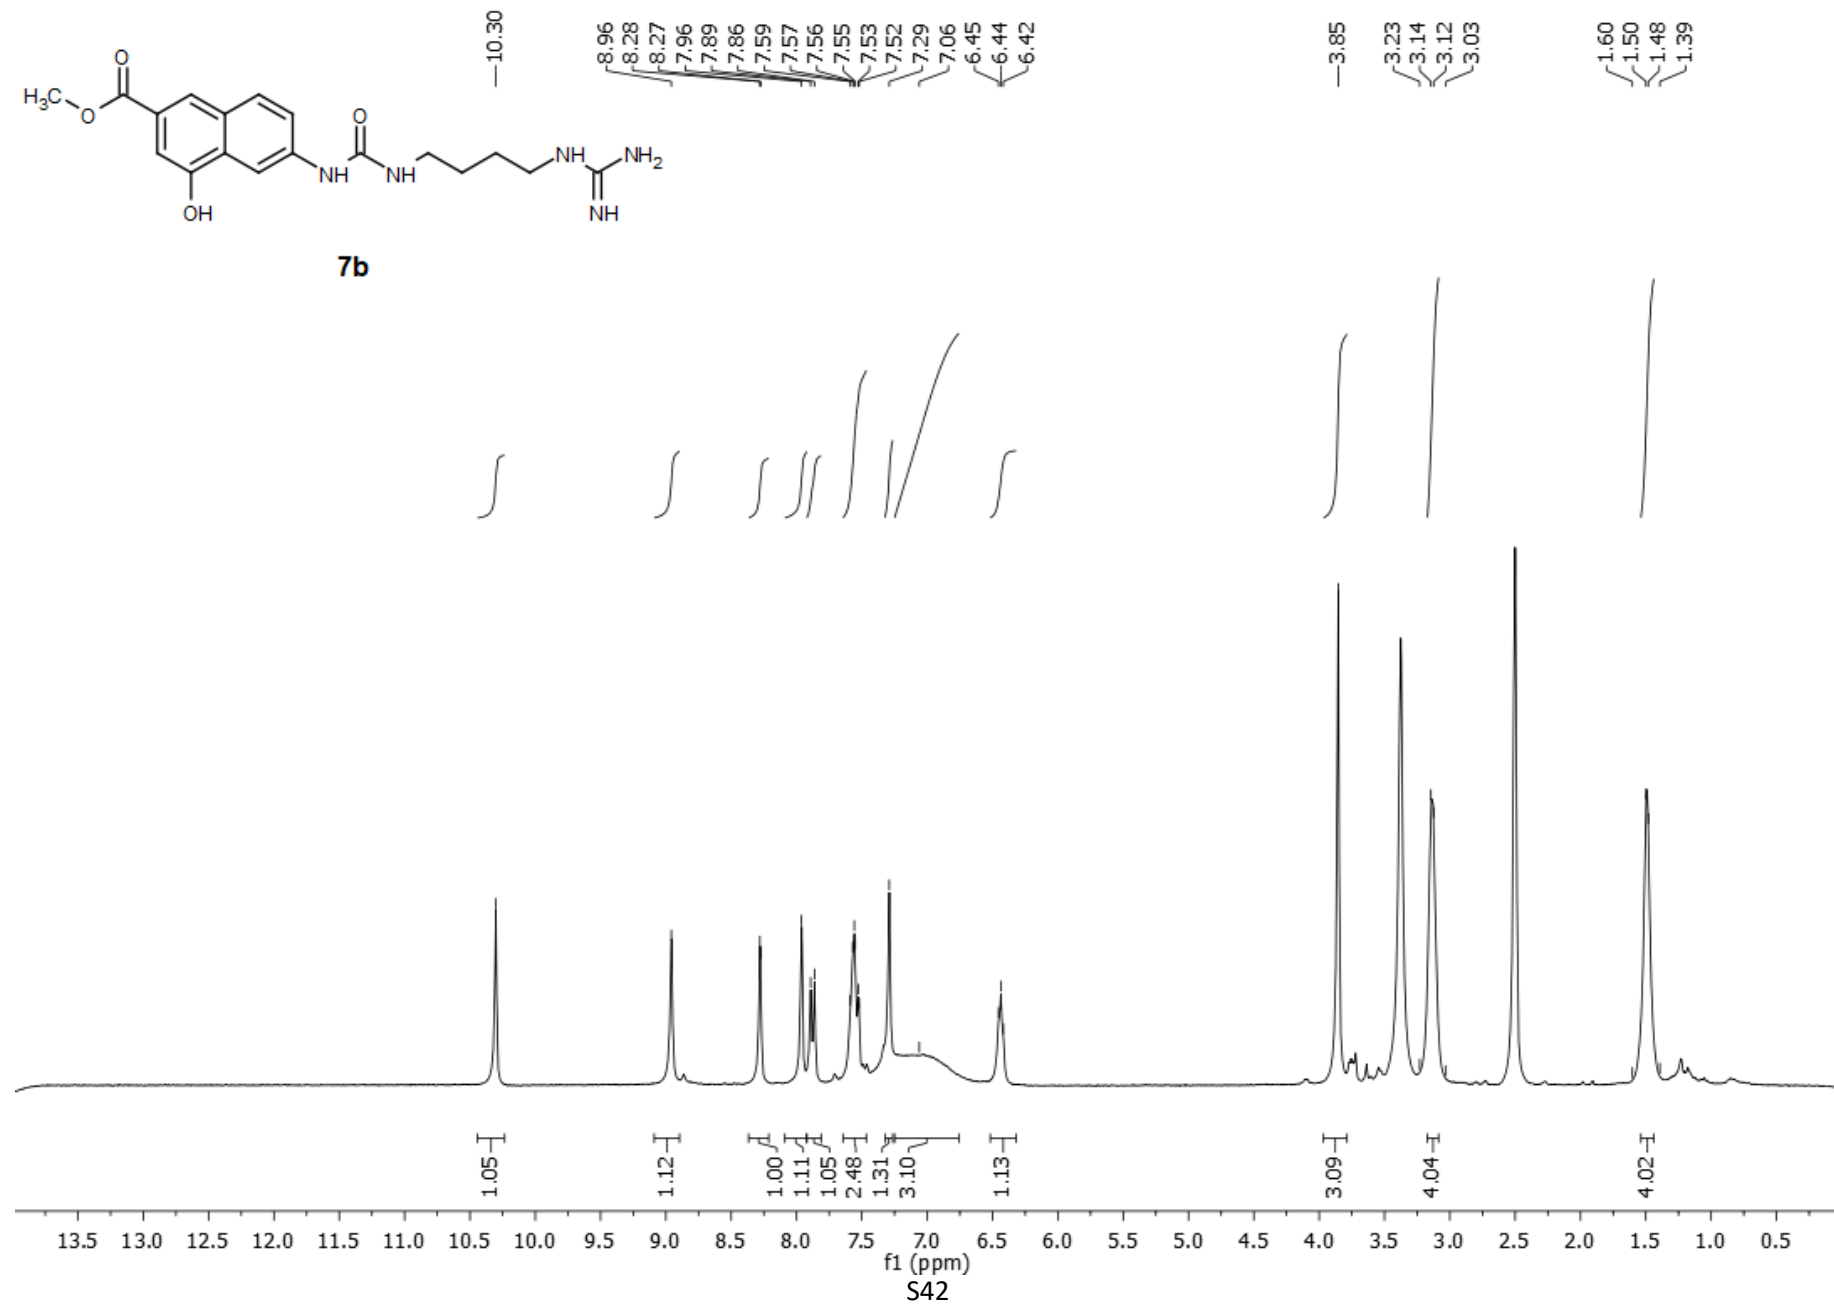

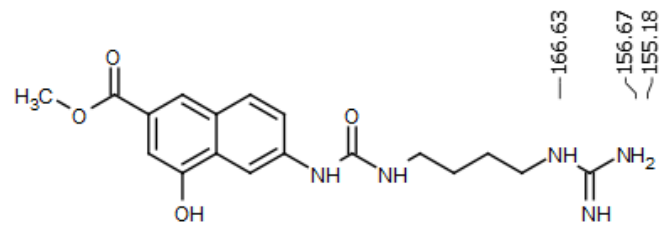

7b

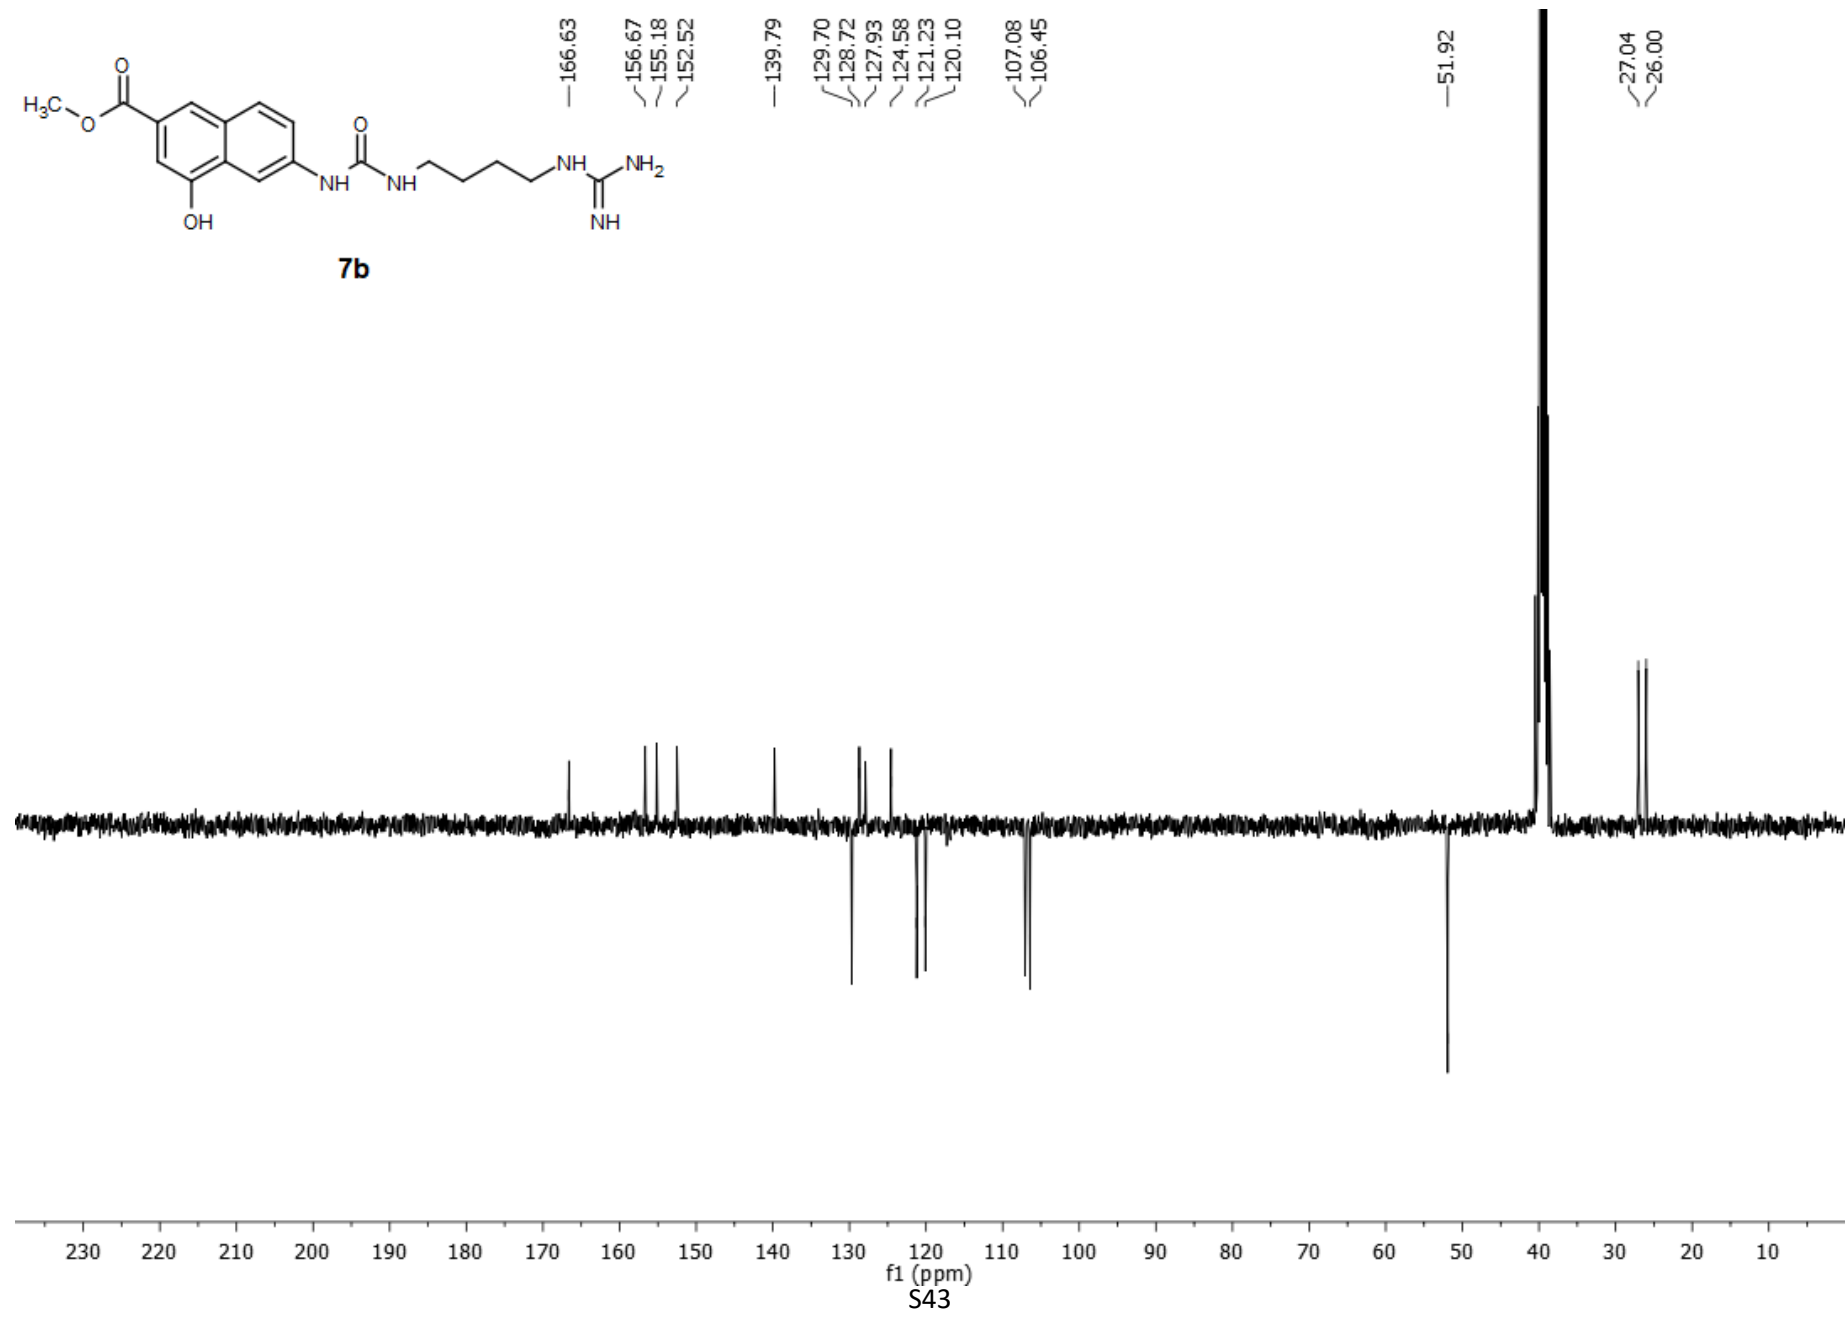

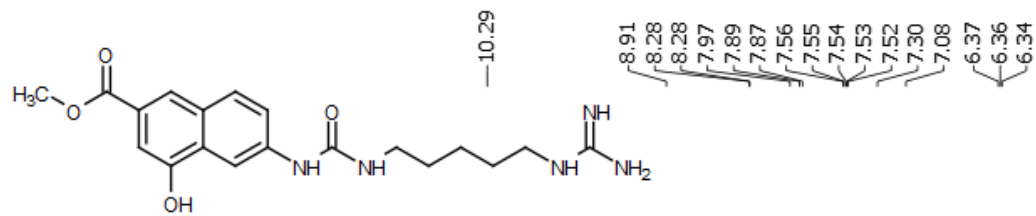

**7c**

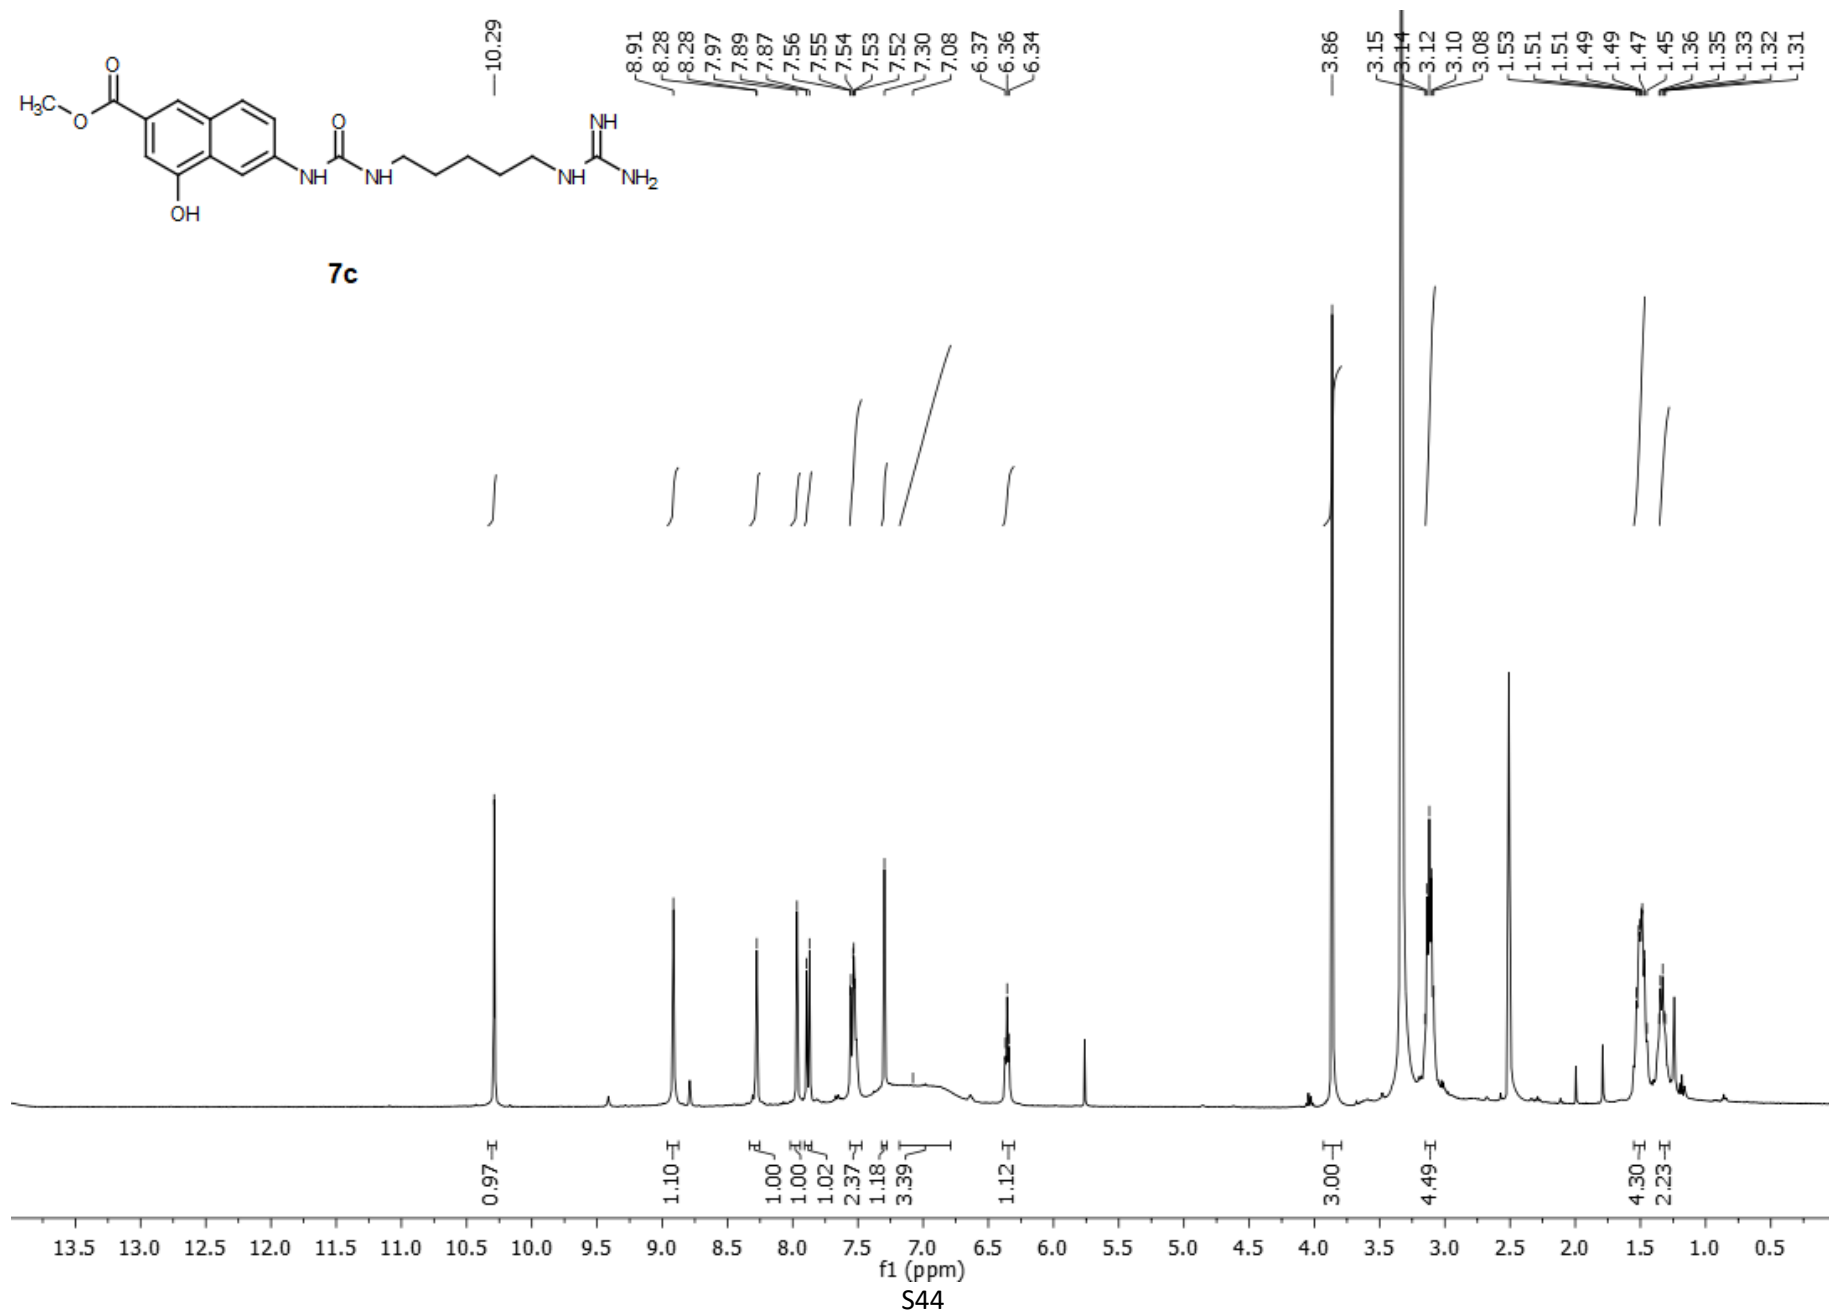



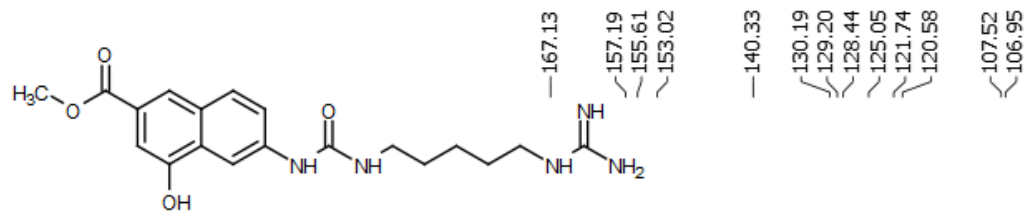

7c

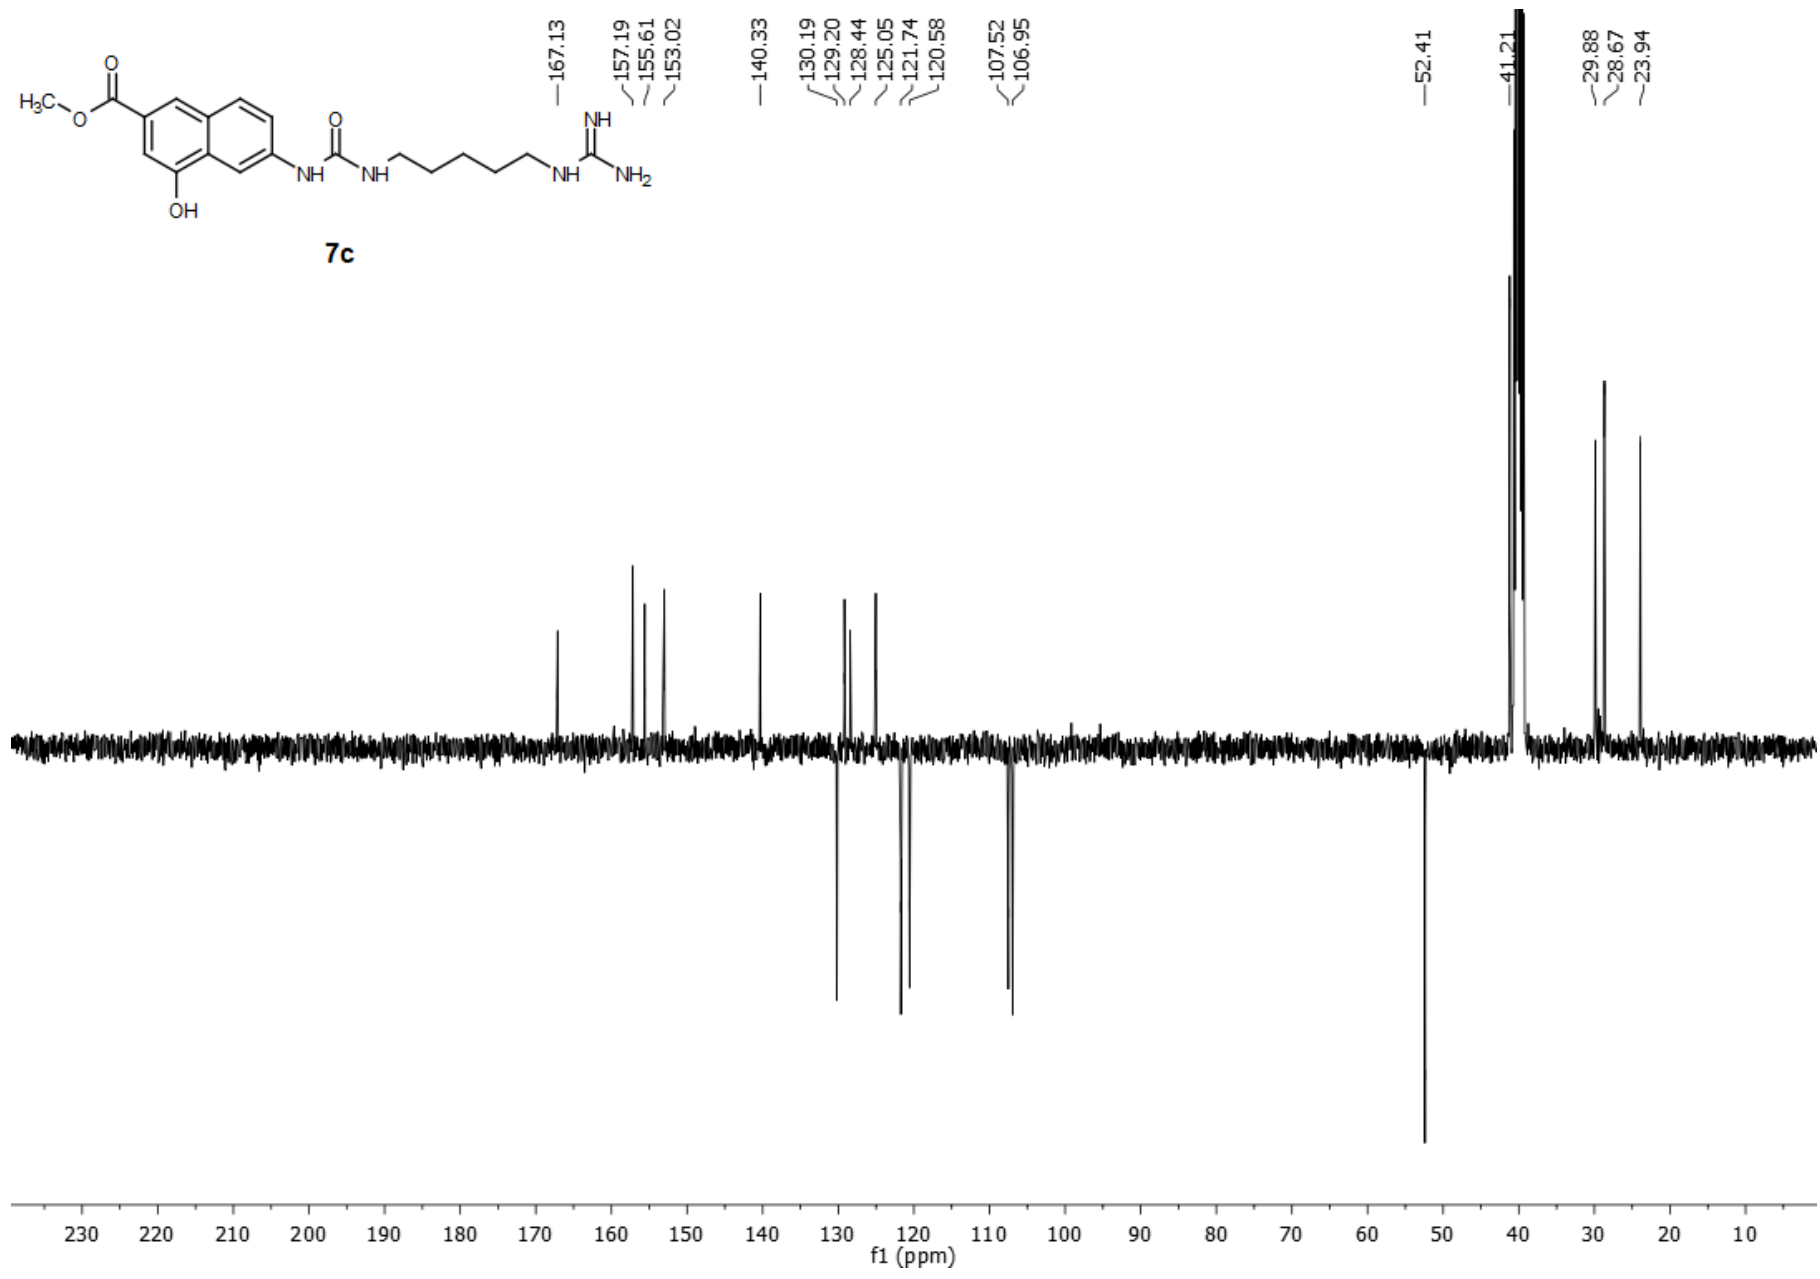

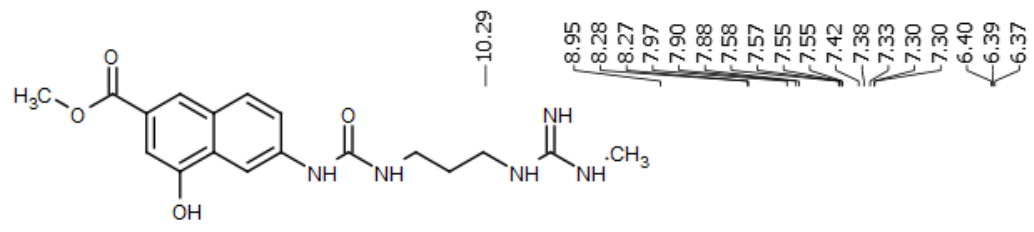

**7d**

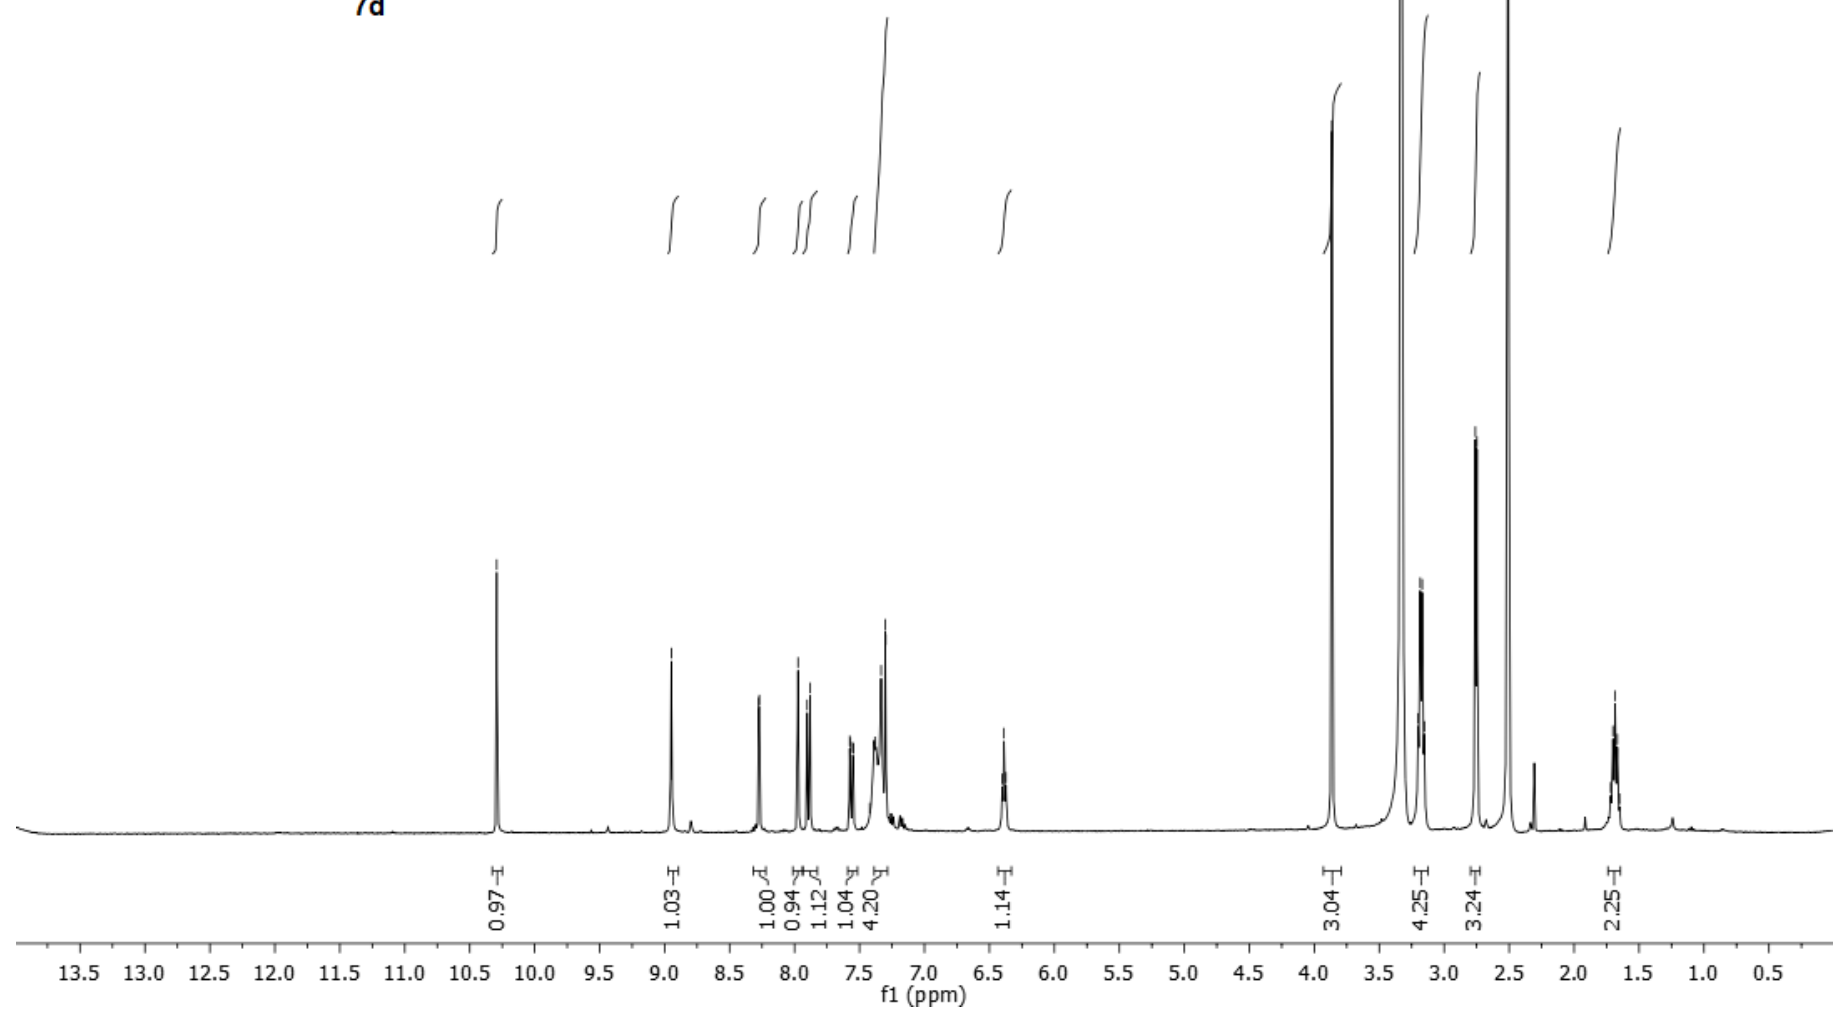

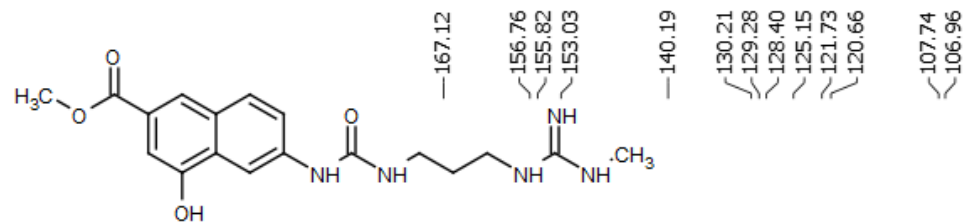

7d

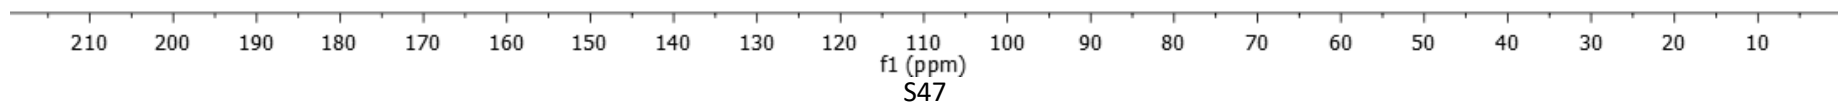

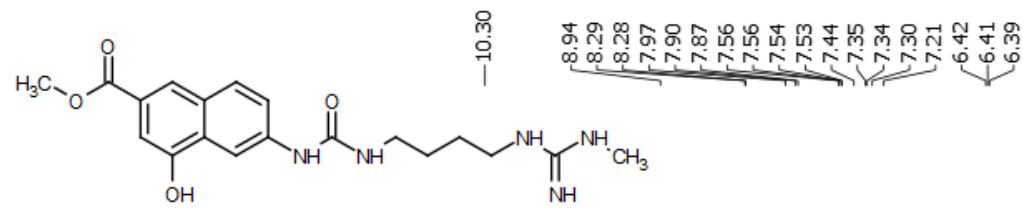

**7e**

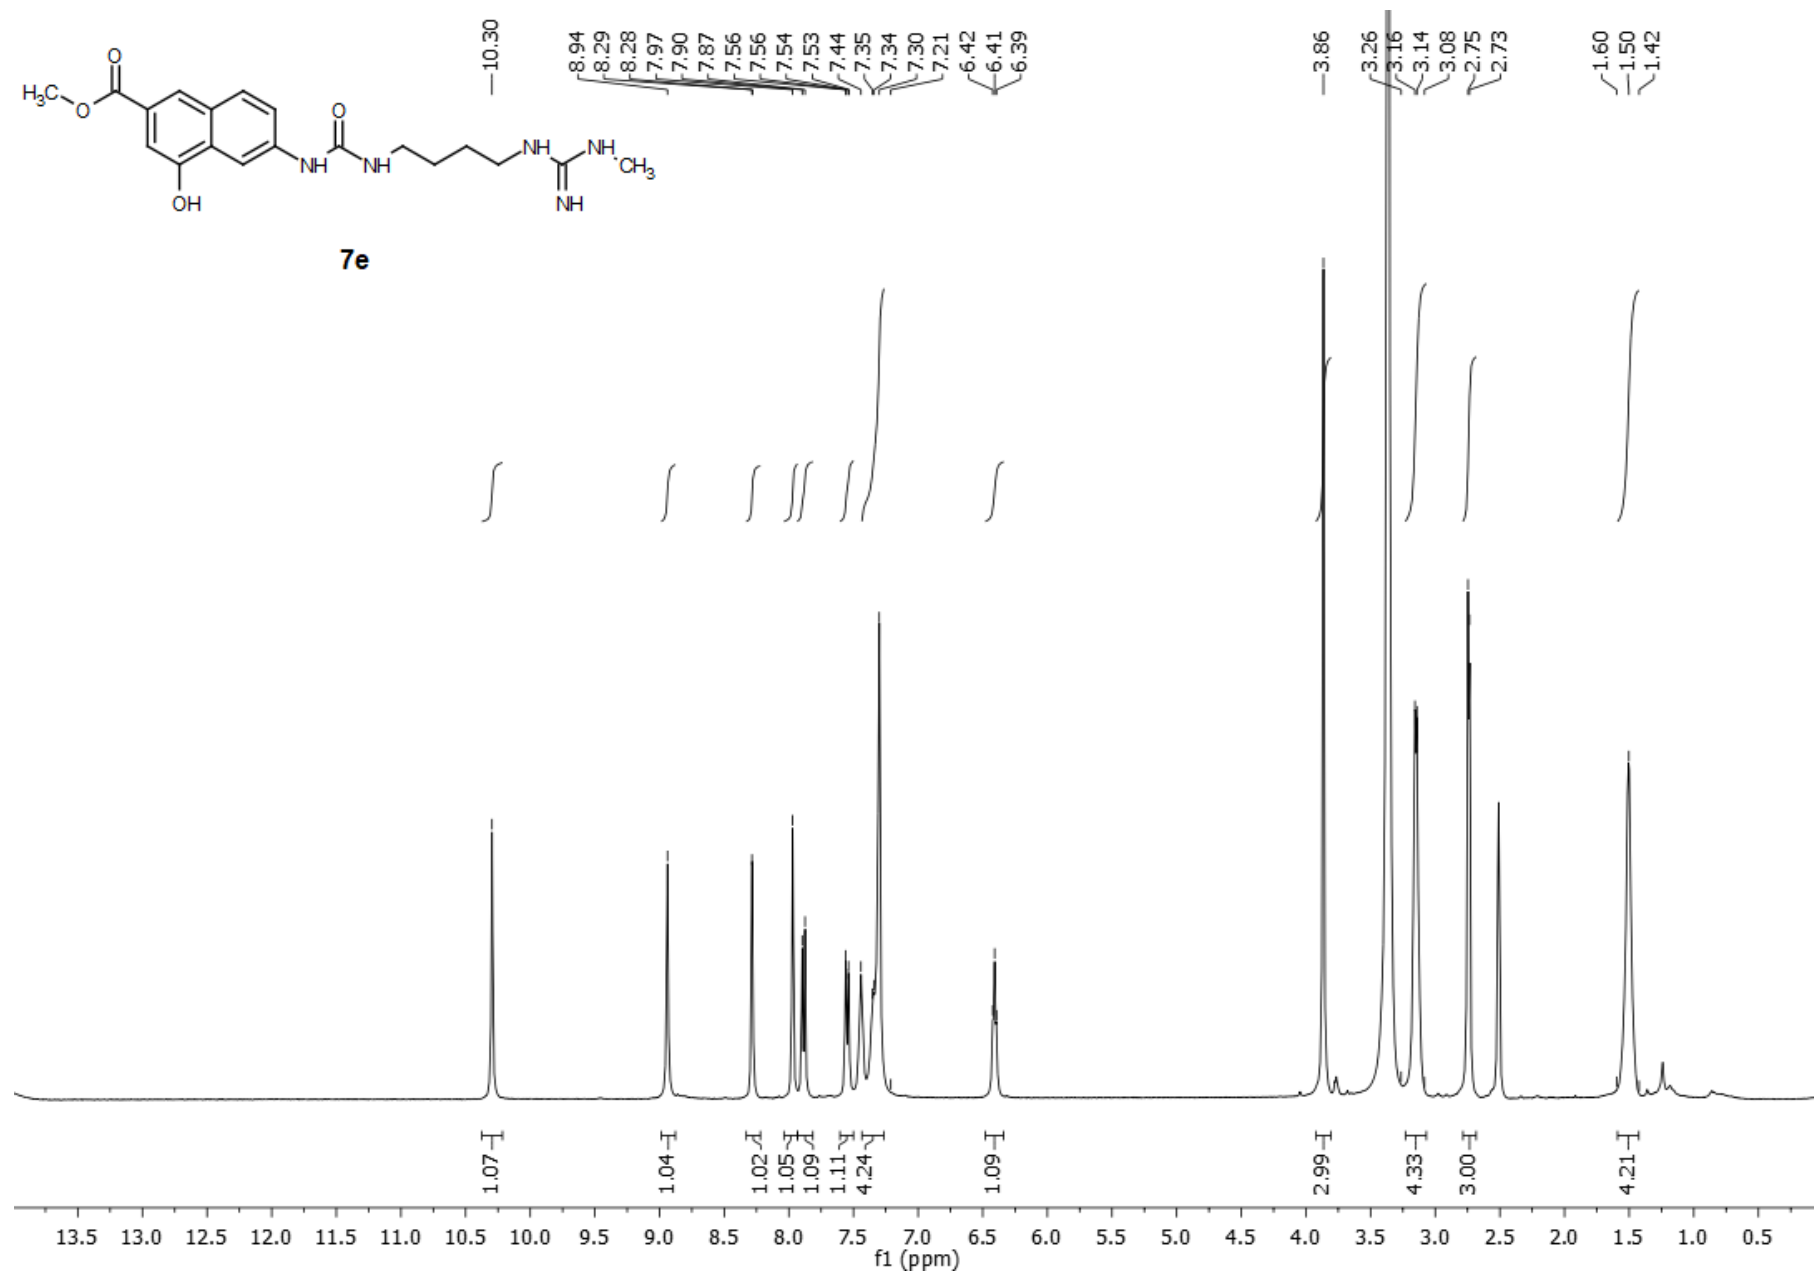

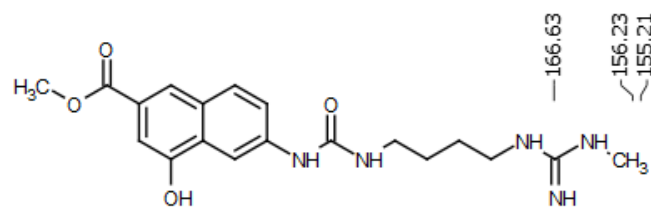

7e

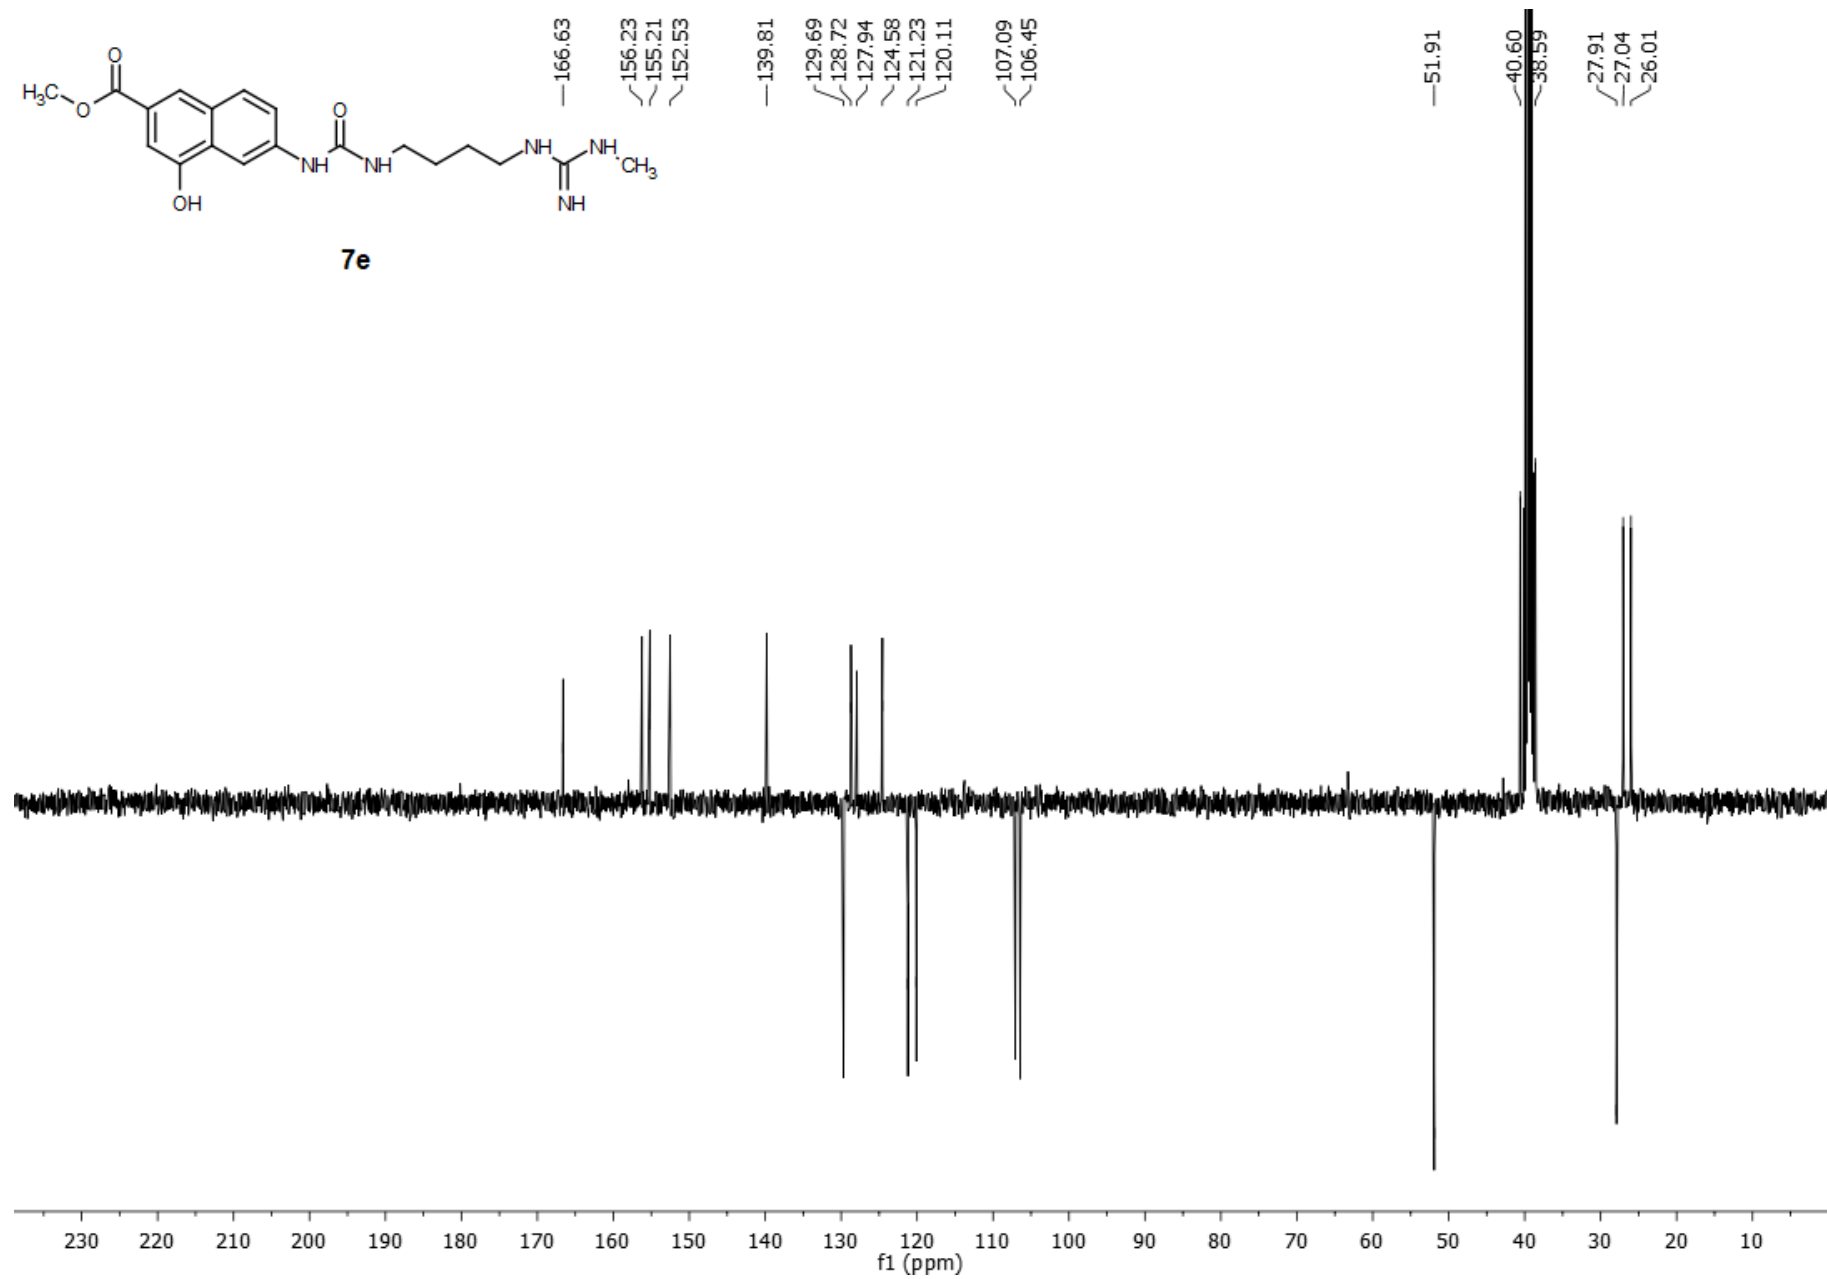

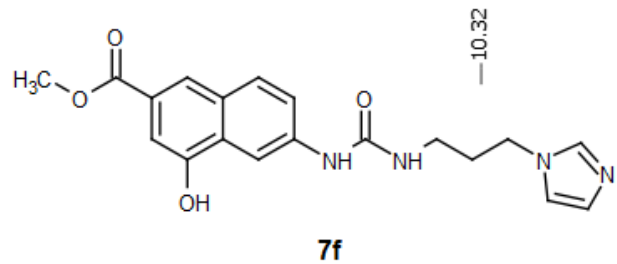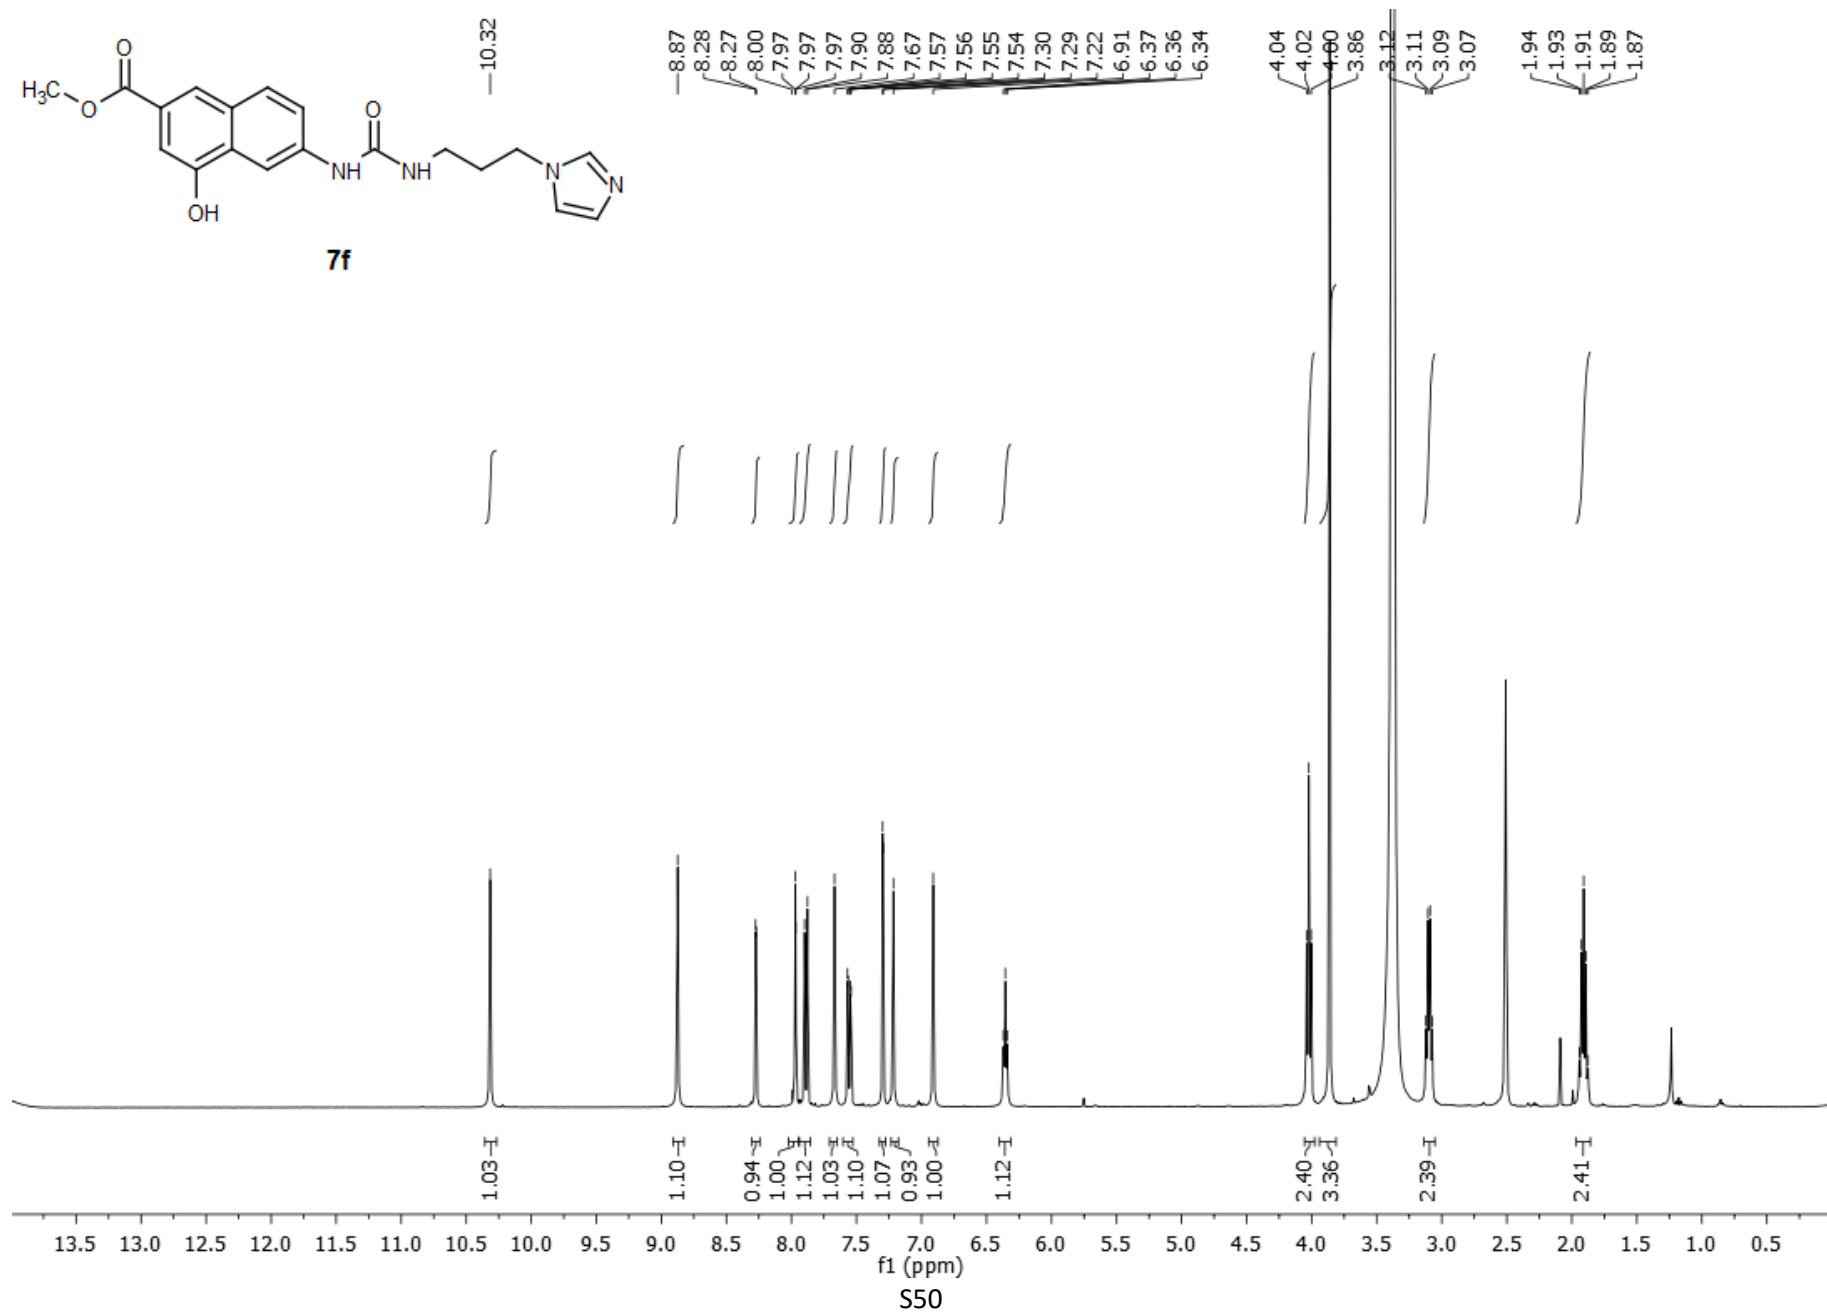

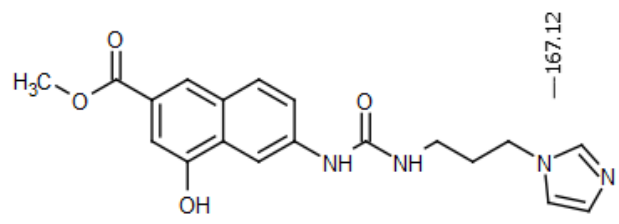

7f

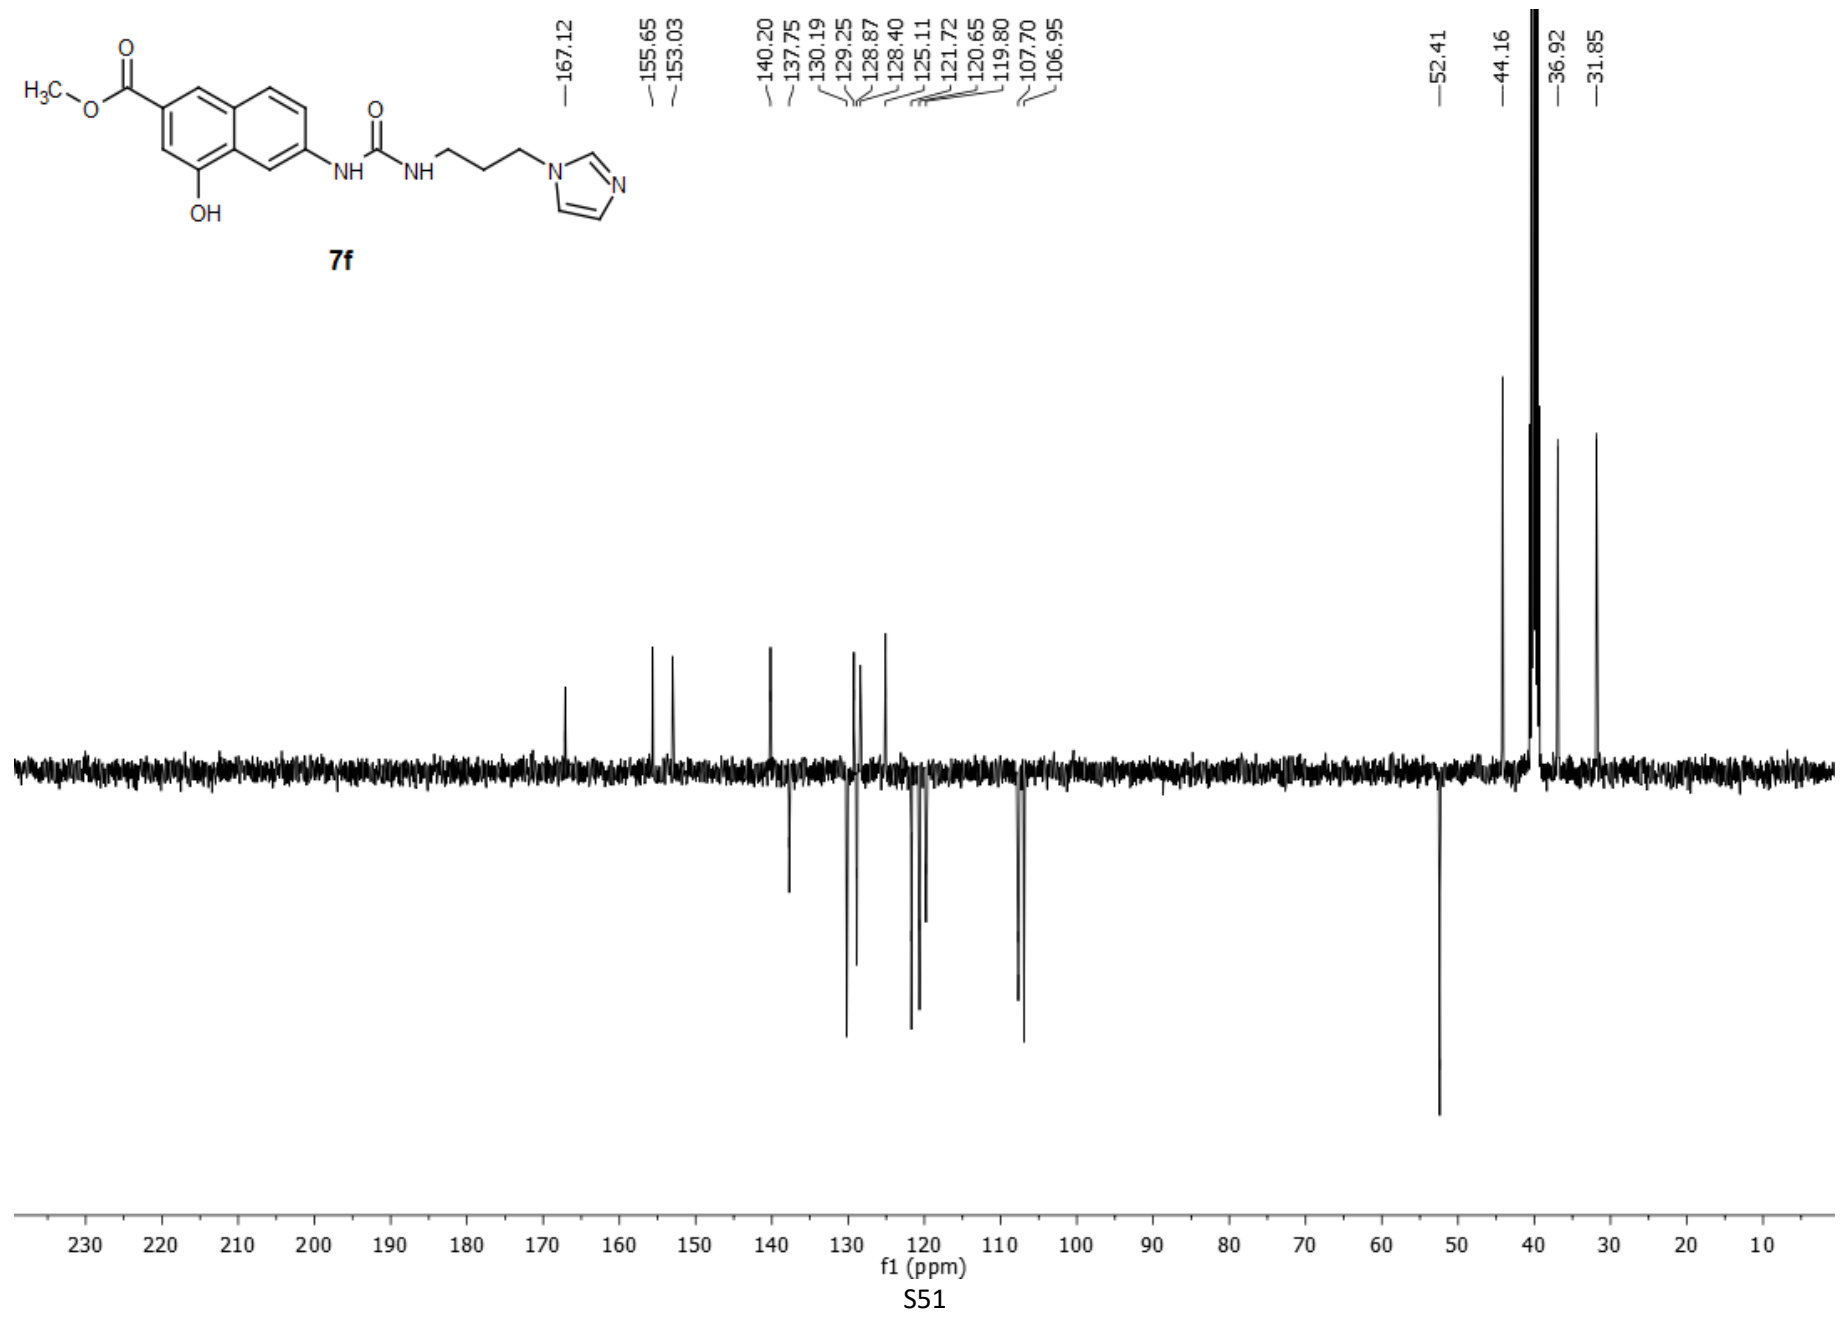

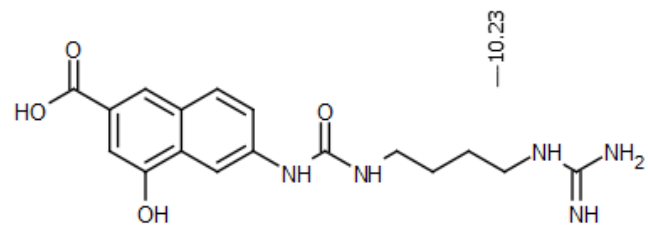

**8a**

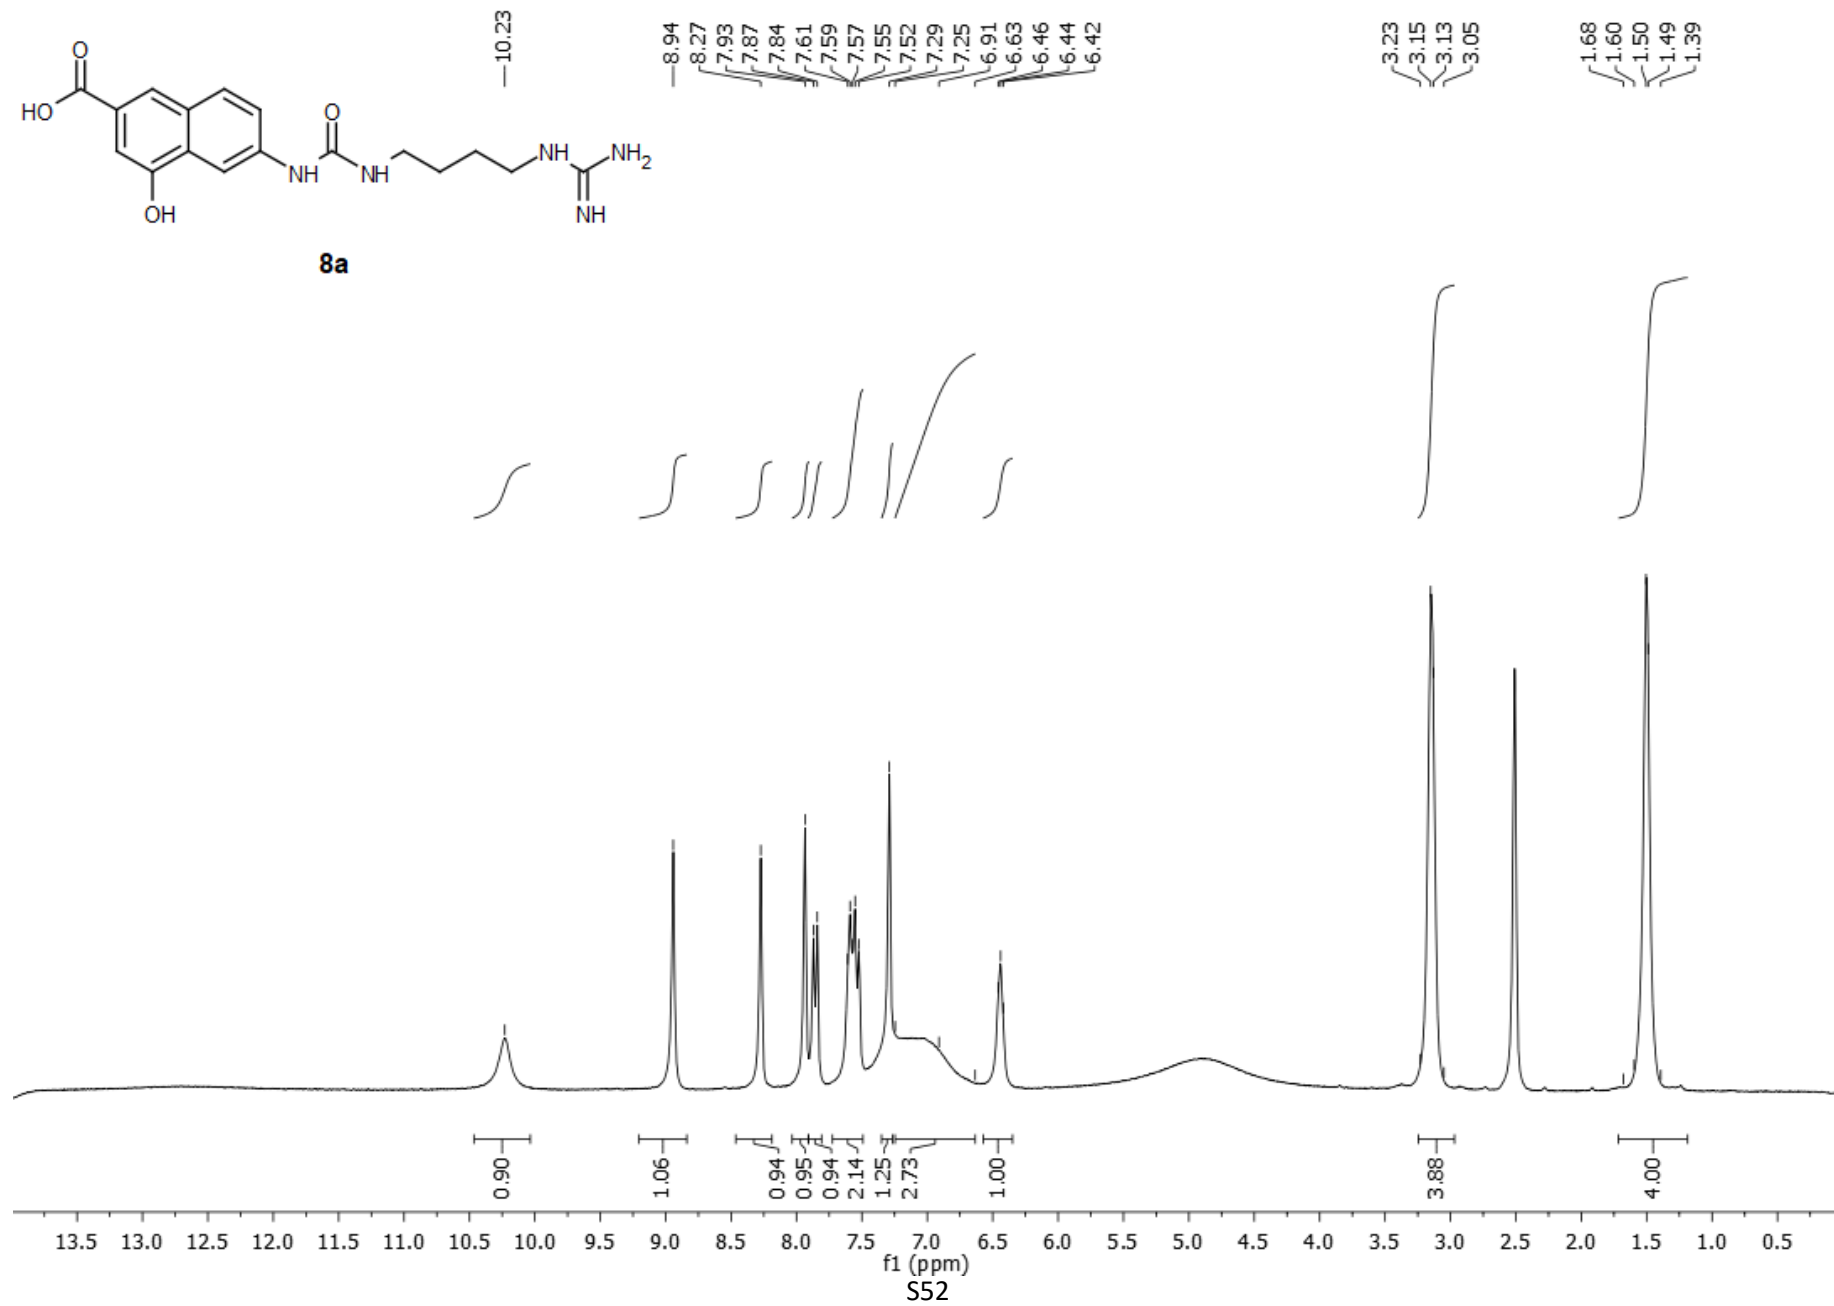



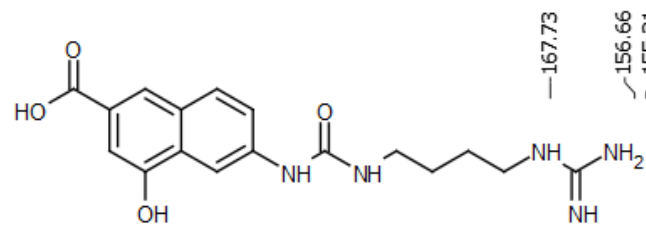

8a

- 167.73
- 156.66
- 155.21
- 152.35
- 139.50
- 129.59
- 128.79
- 127.73
- 125.80
- 121.26
- 119.95
- 107.16
- 106.92

- 27.06
- 26.00

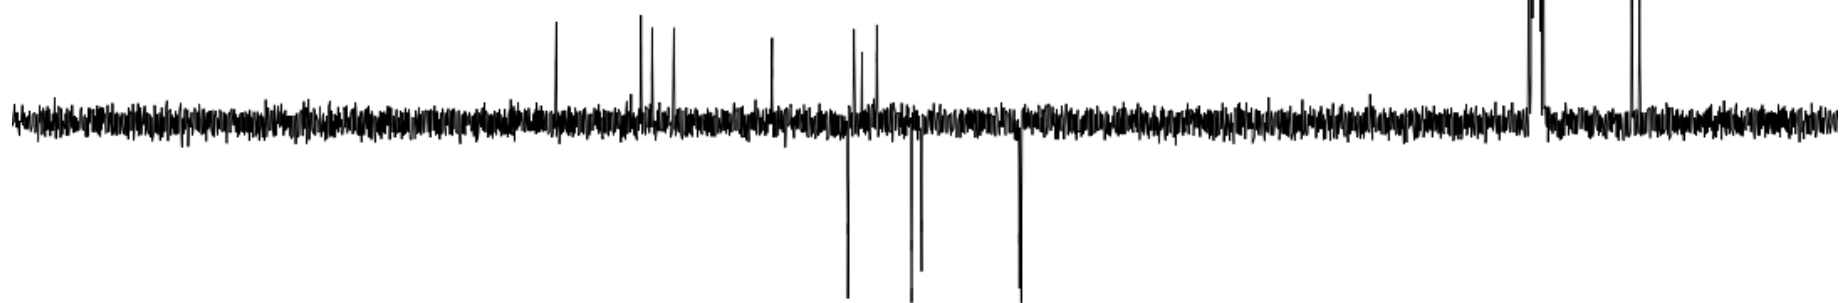

230 220 210 200 190 180 170 160 150 140 130 120 110 100 90 80 70 60 50 40 30 20 10

f1 (ppm)  
S53

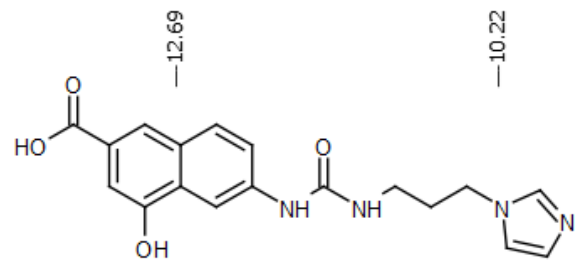

**8b**

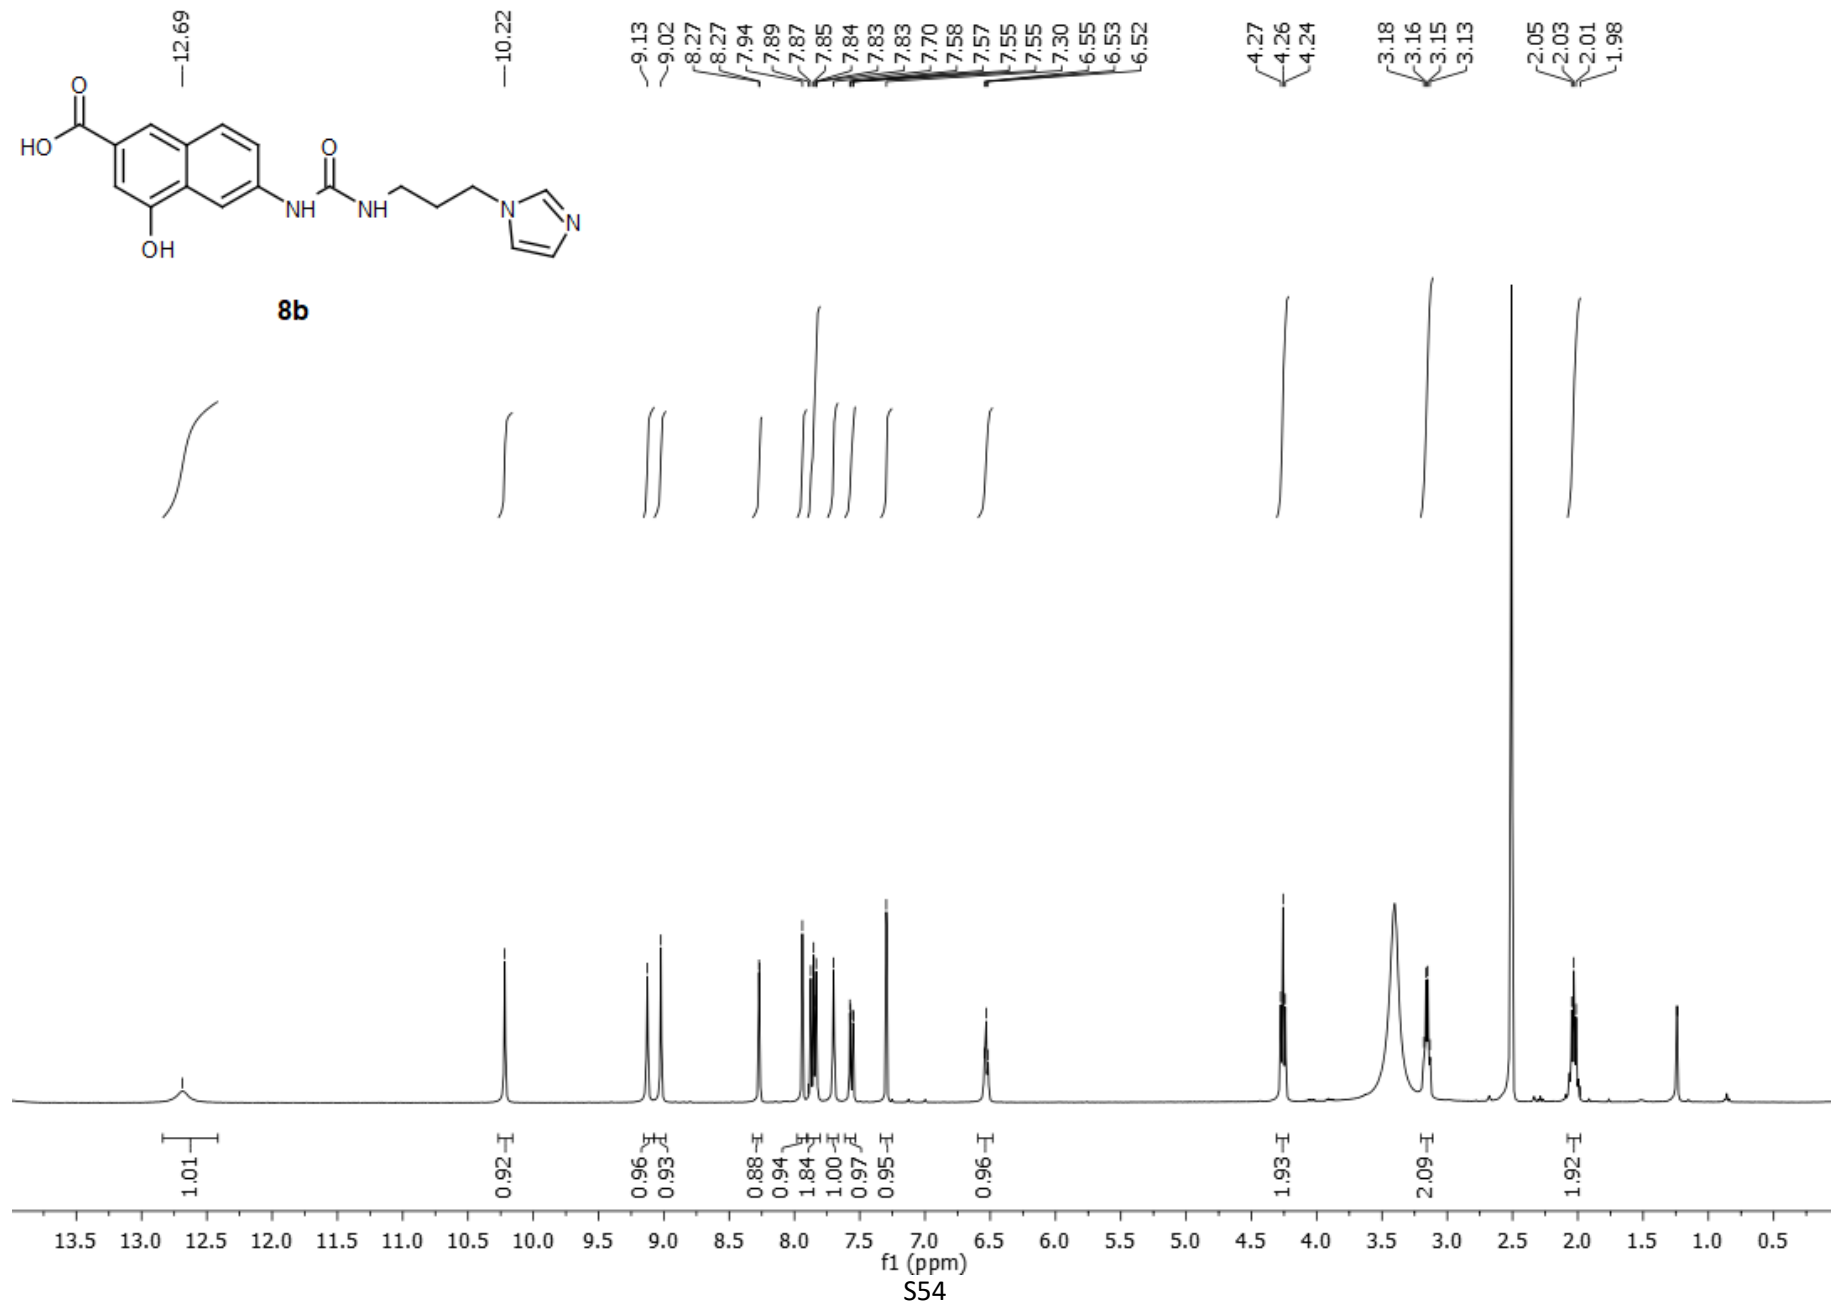

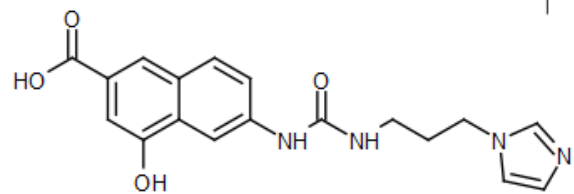

8b

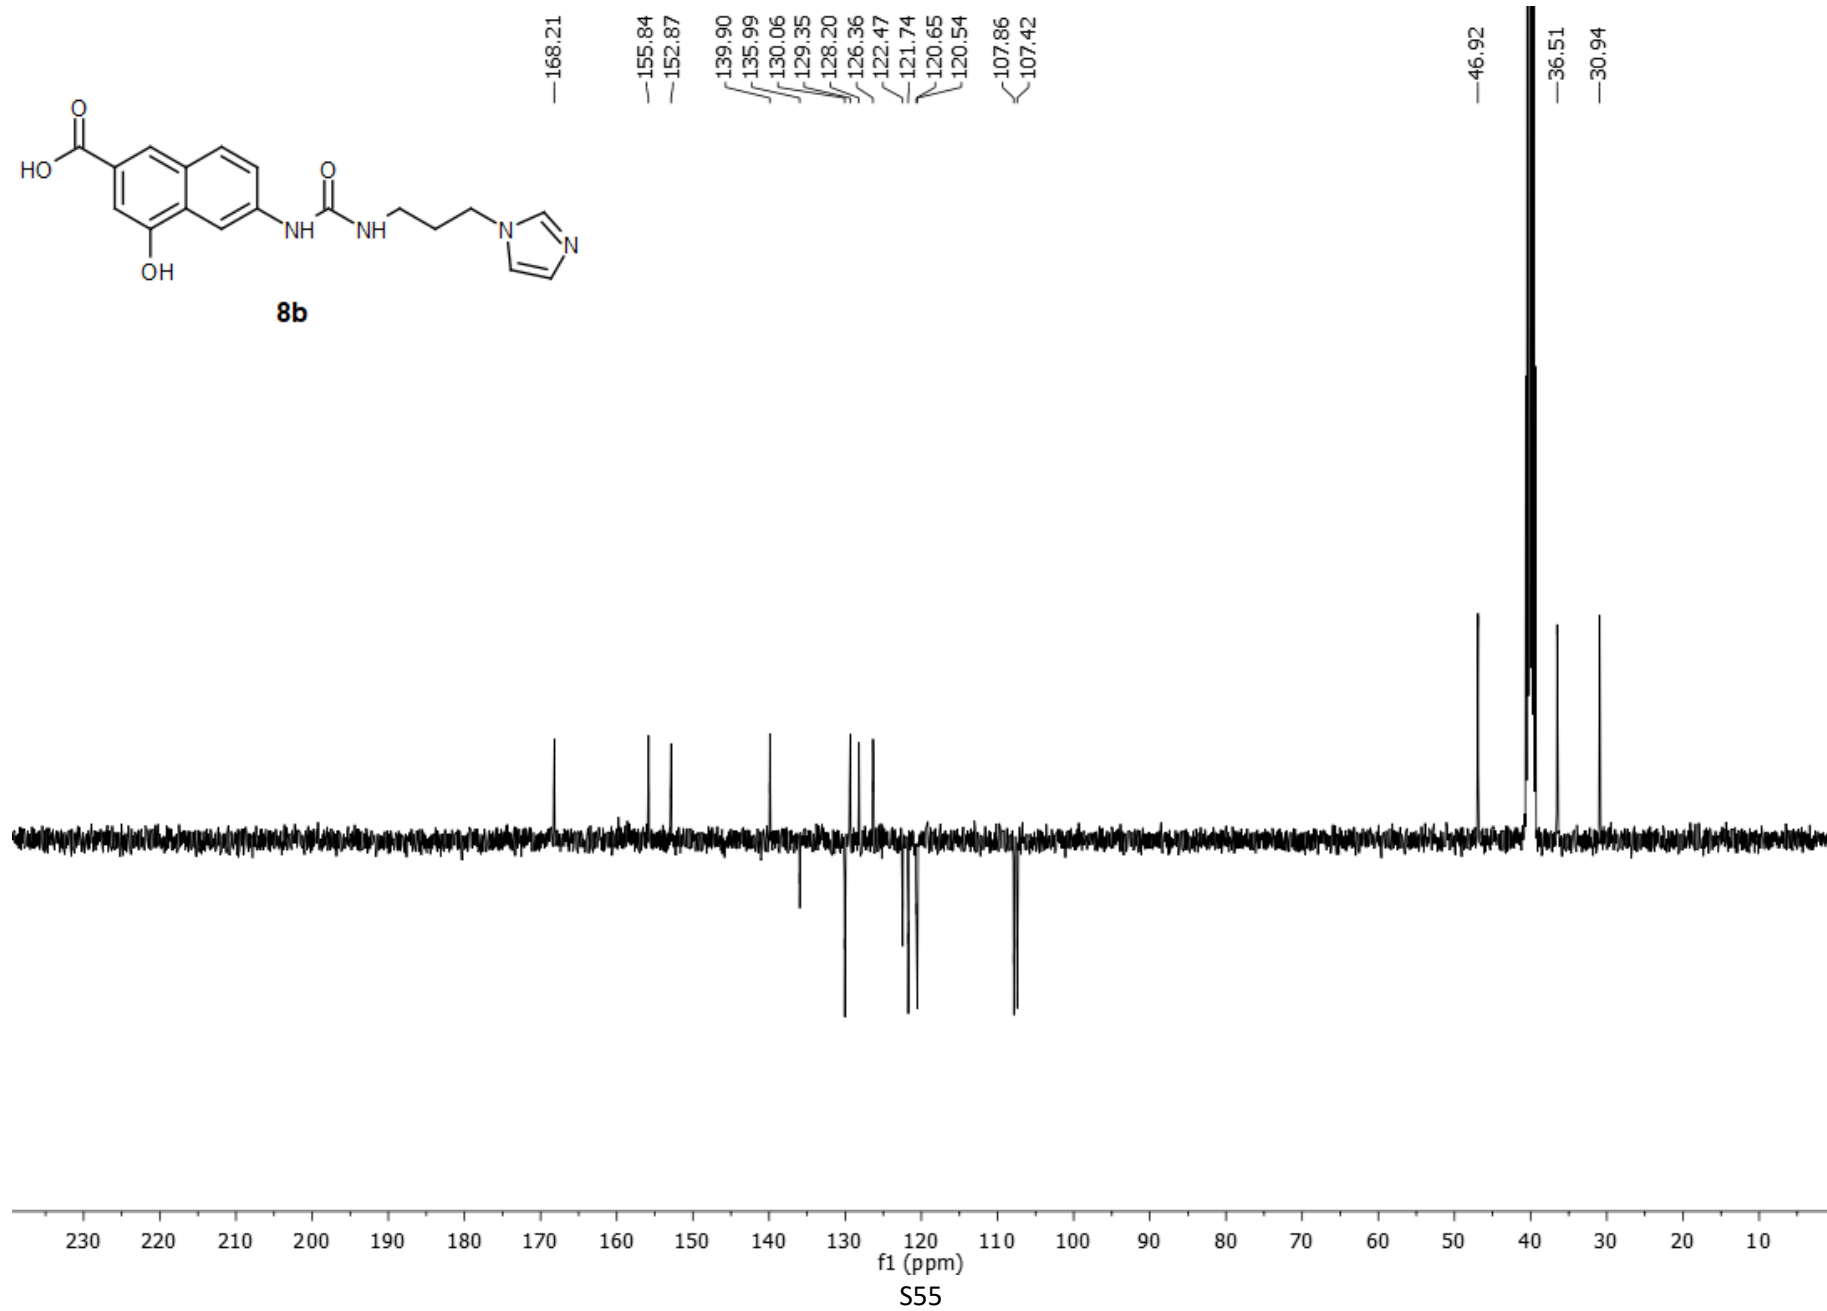

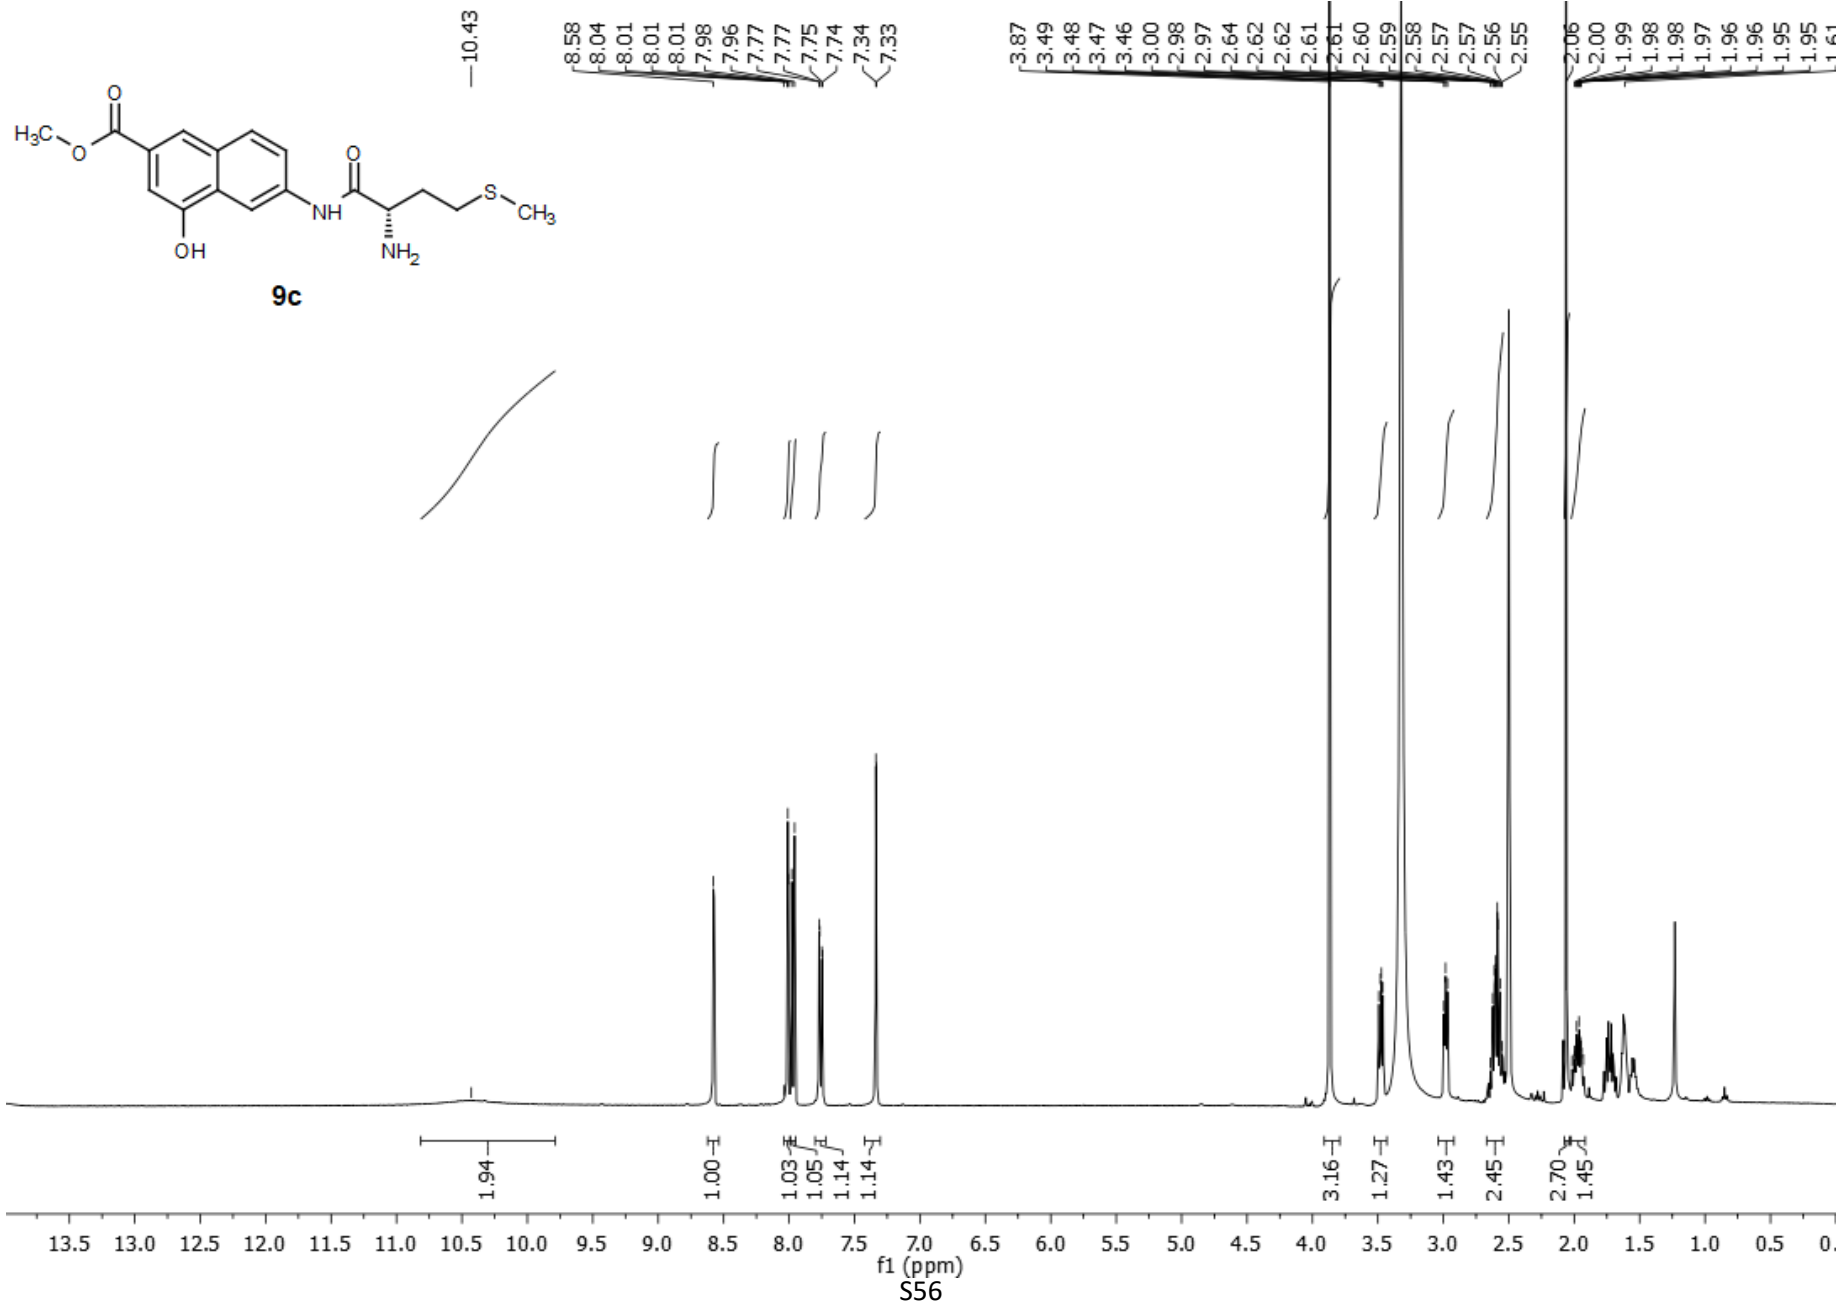

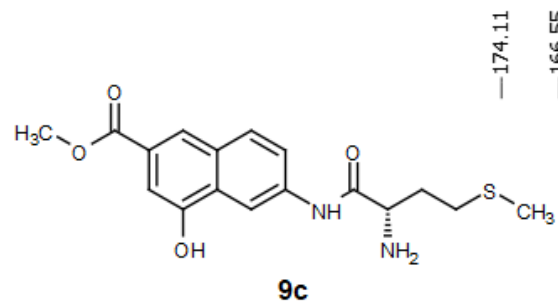

—174.11

—166.55

—153.00

—137.81

—129.93

—127.46

—125.73

—121.05

—120.83

—109.84

—106.64

—54.72

—52.02

—34.26

—29.89

—14.62

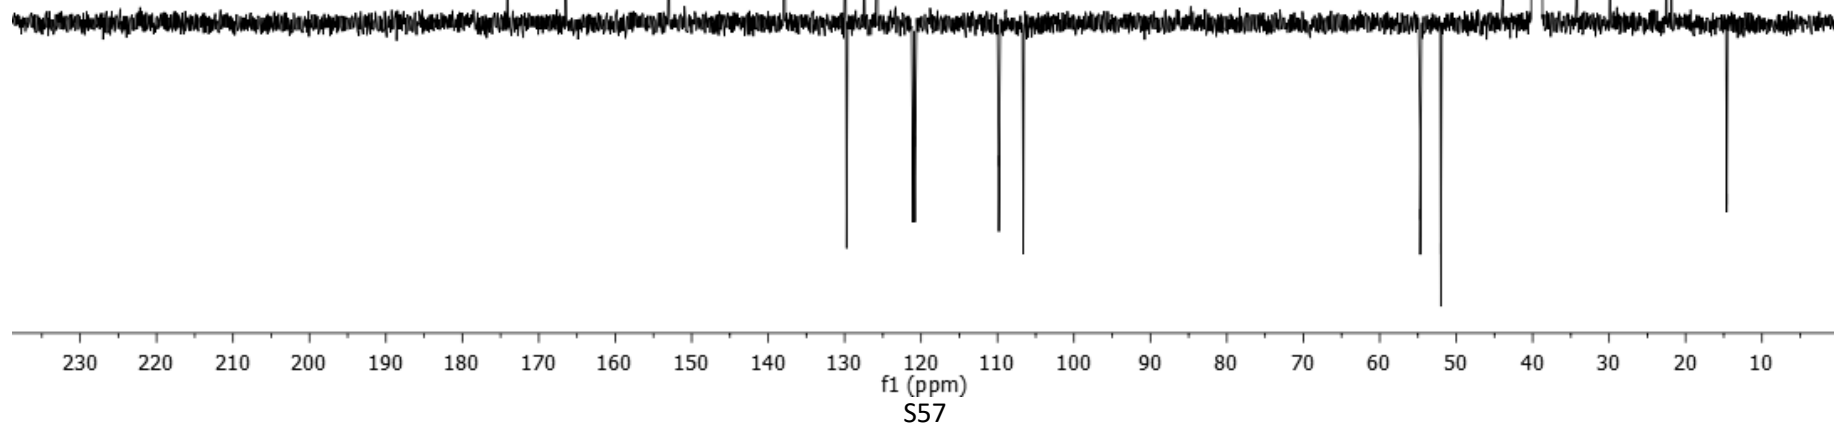

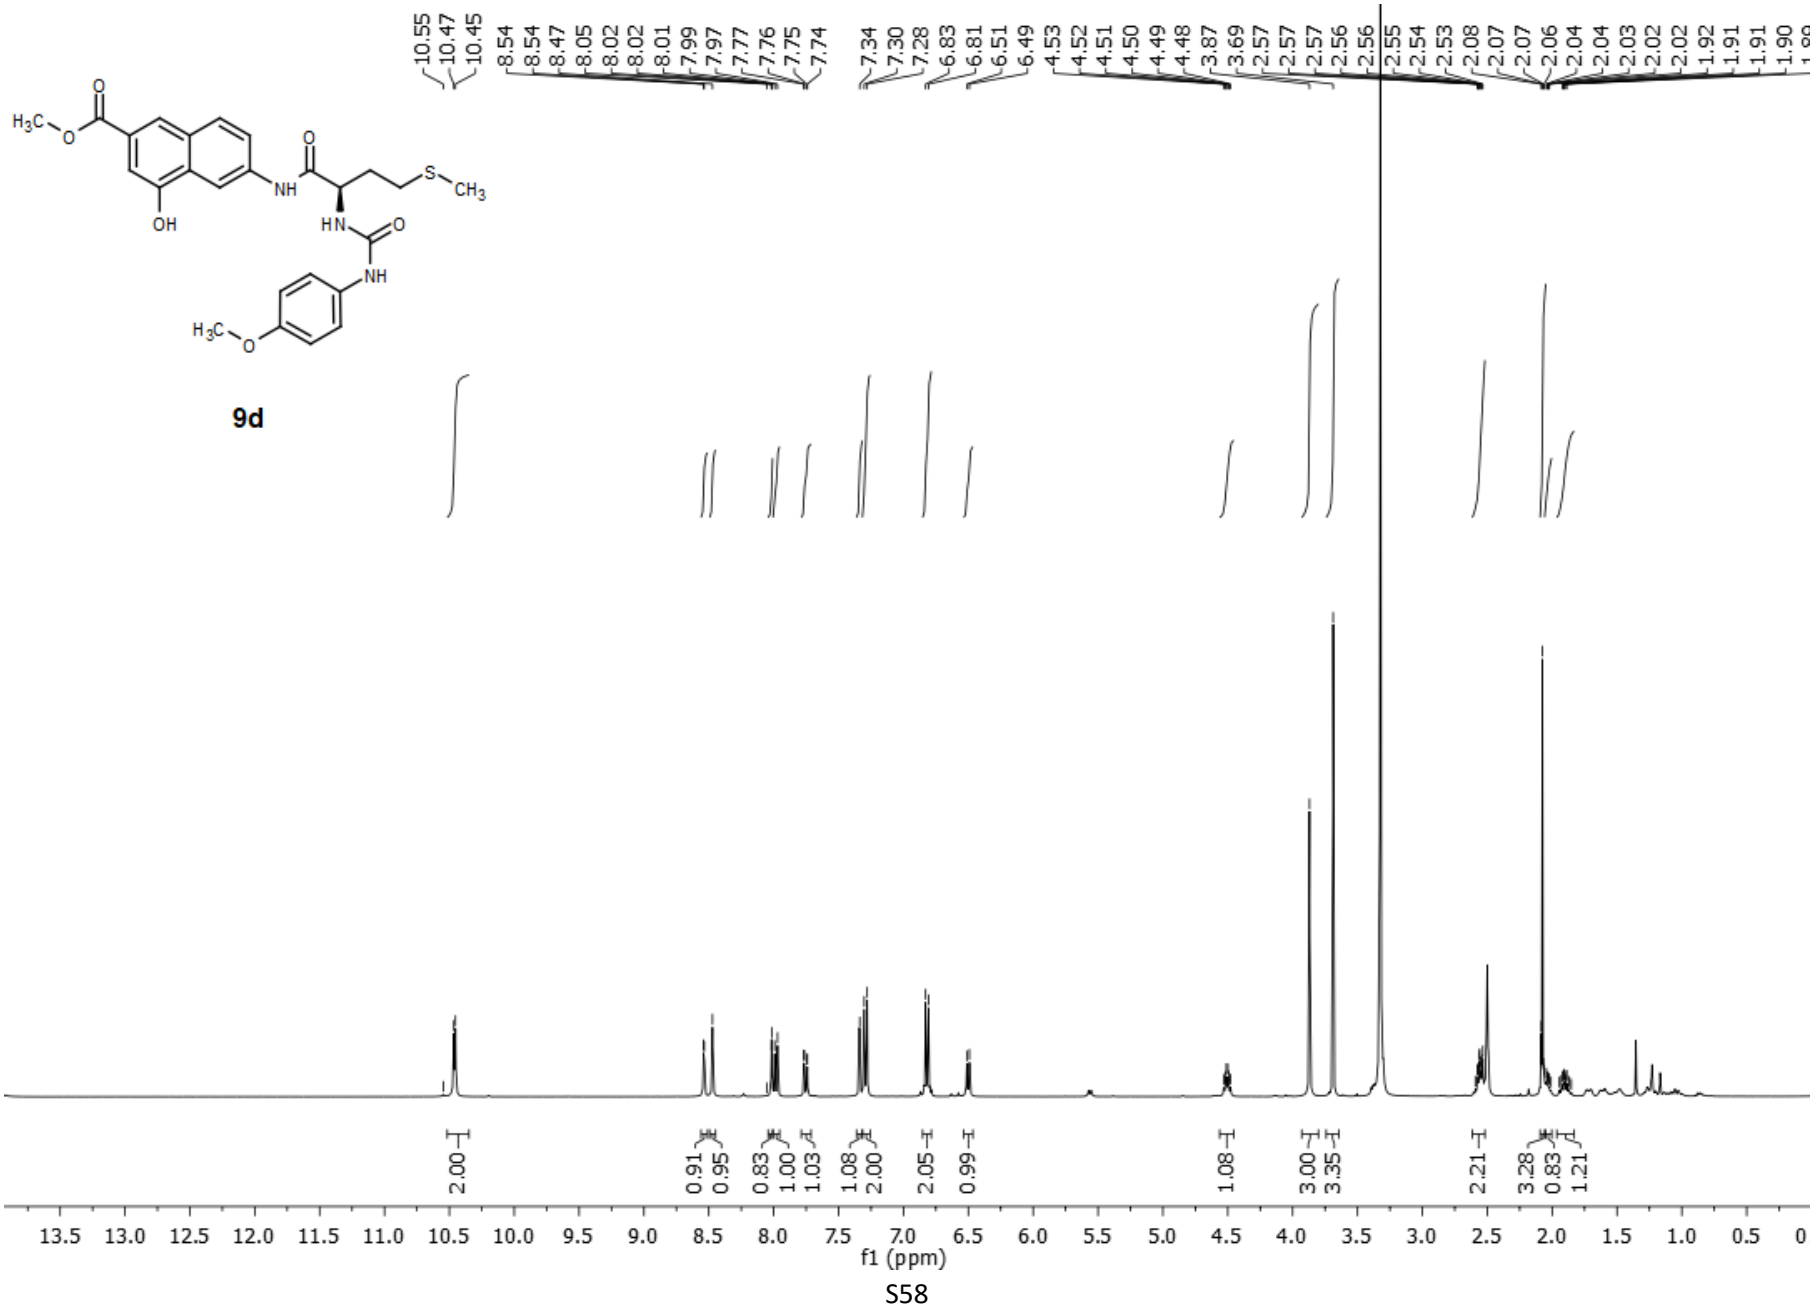

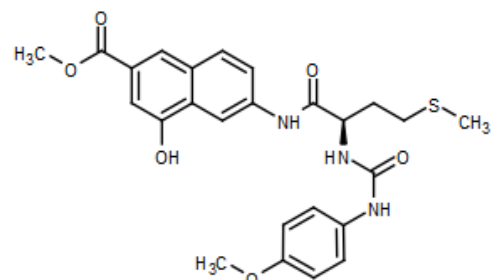

9d

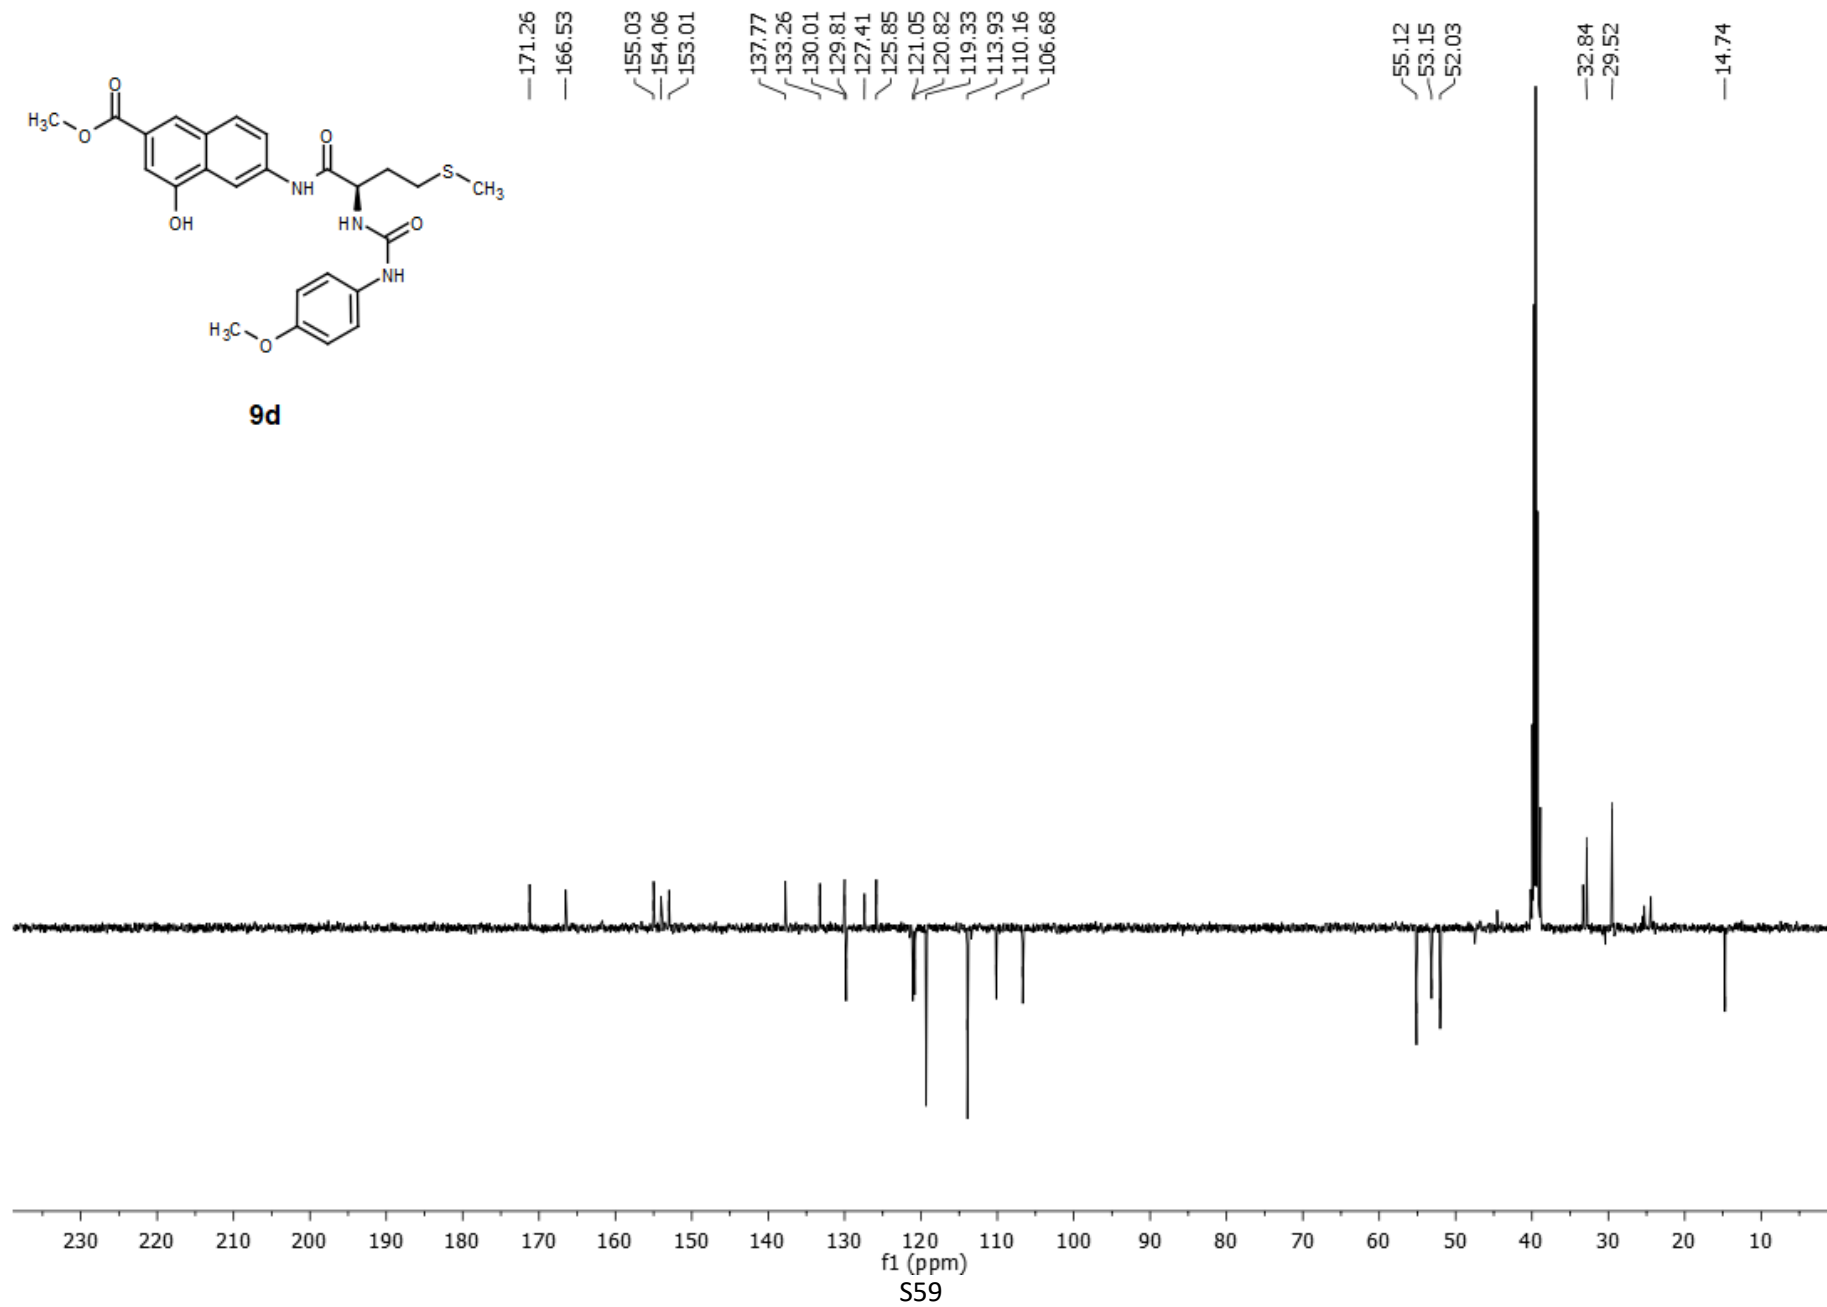

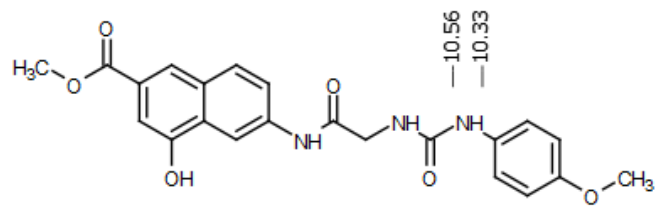

10c

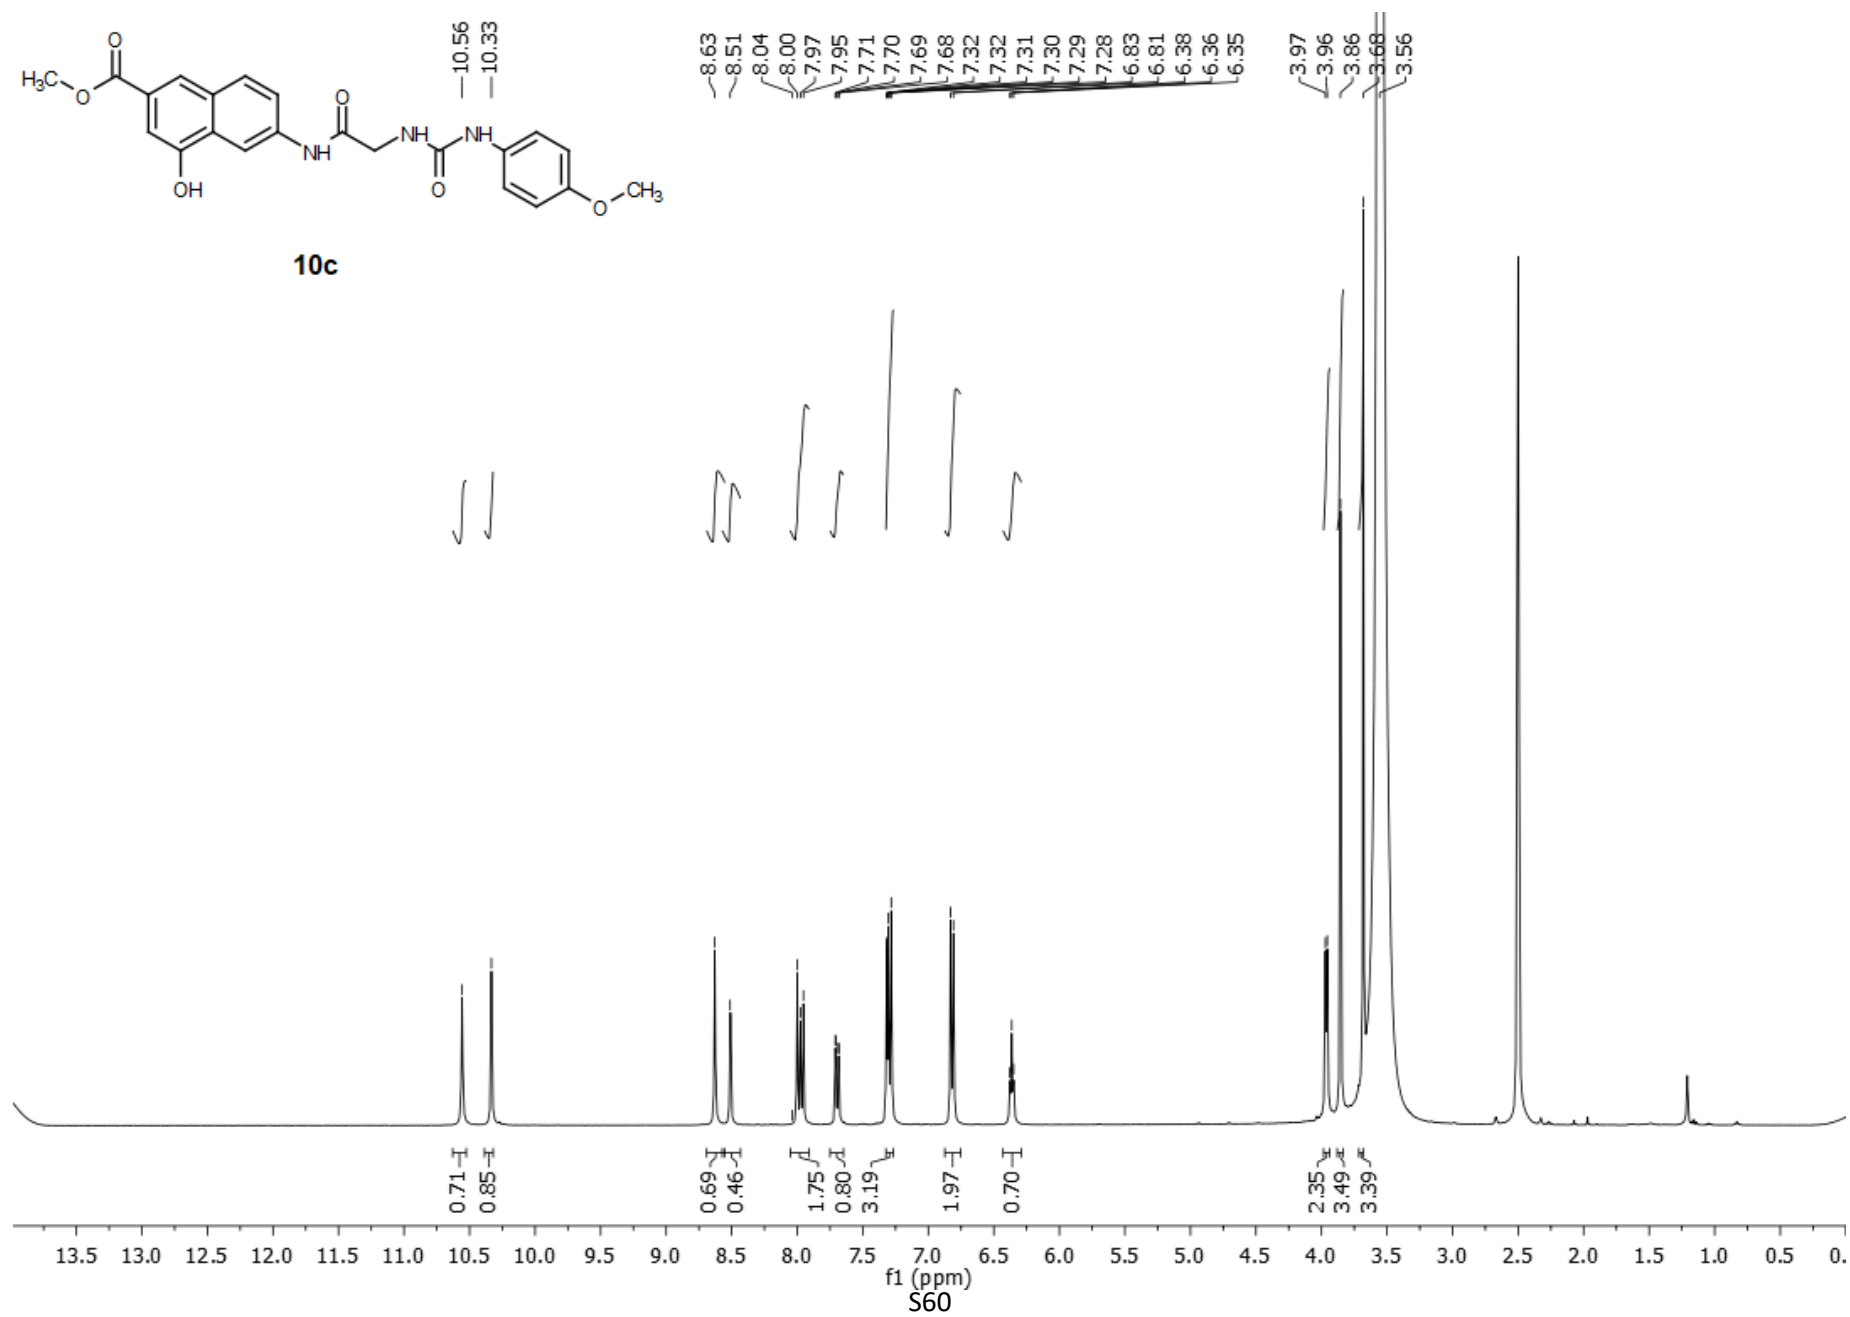



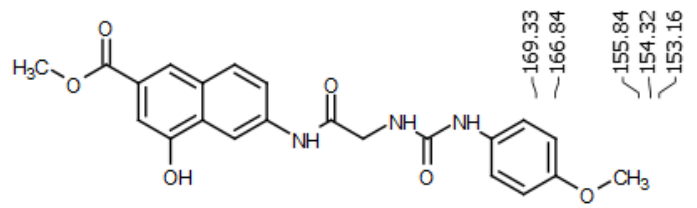

10c

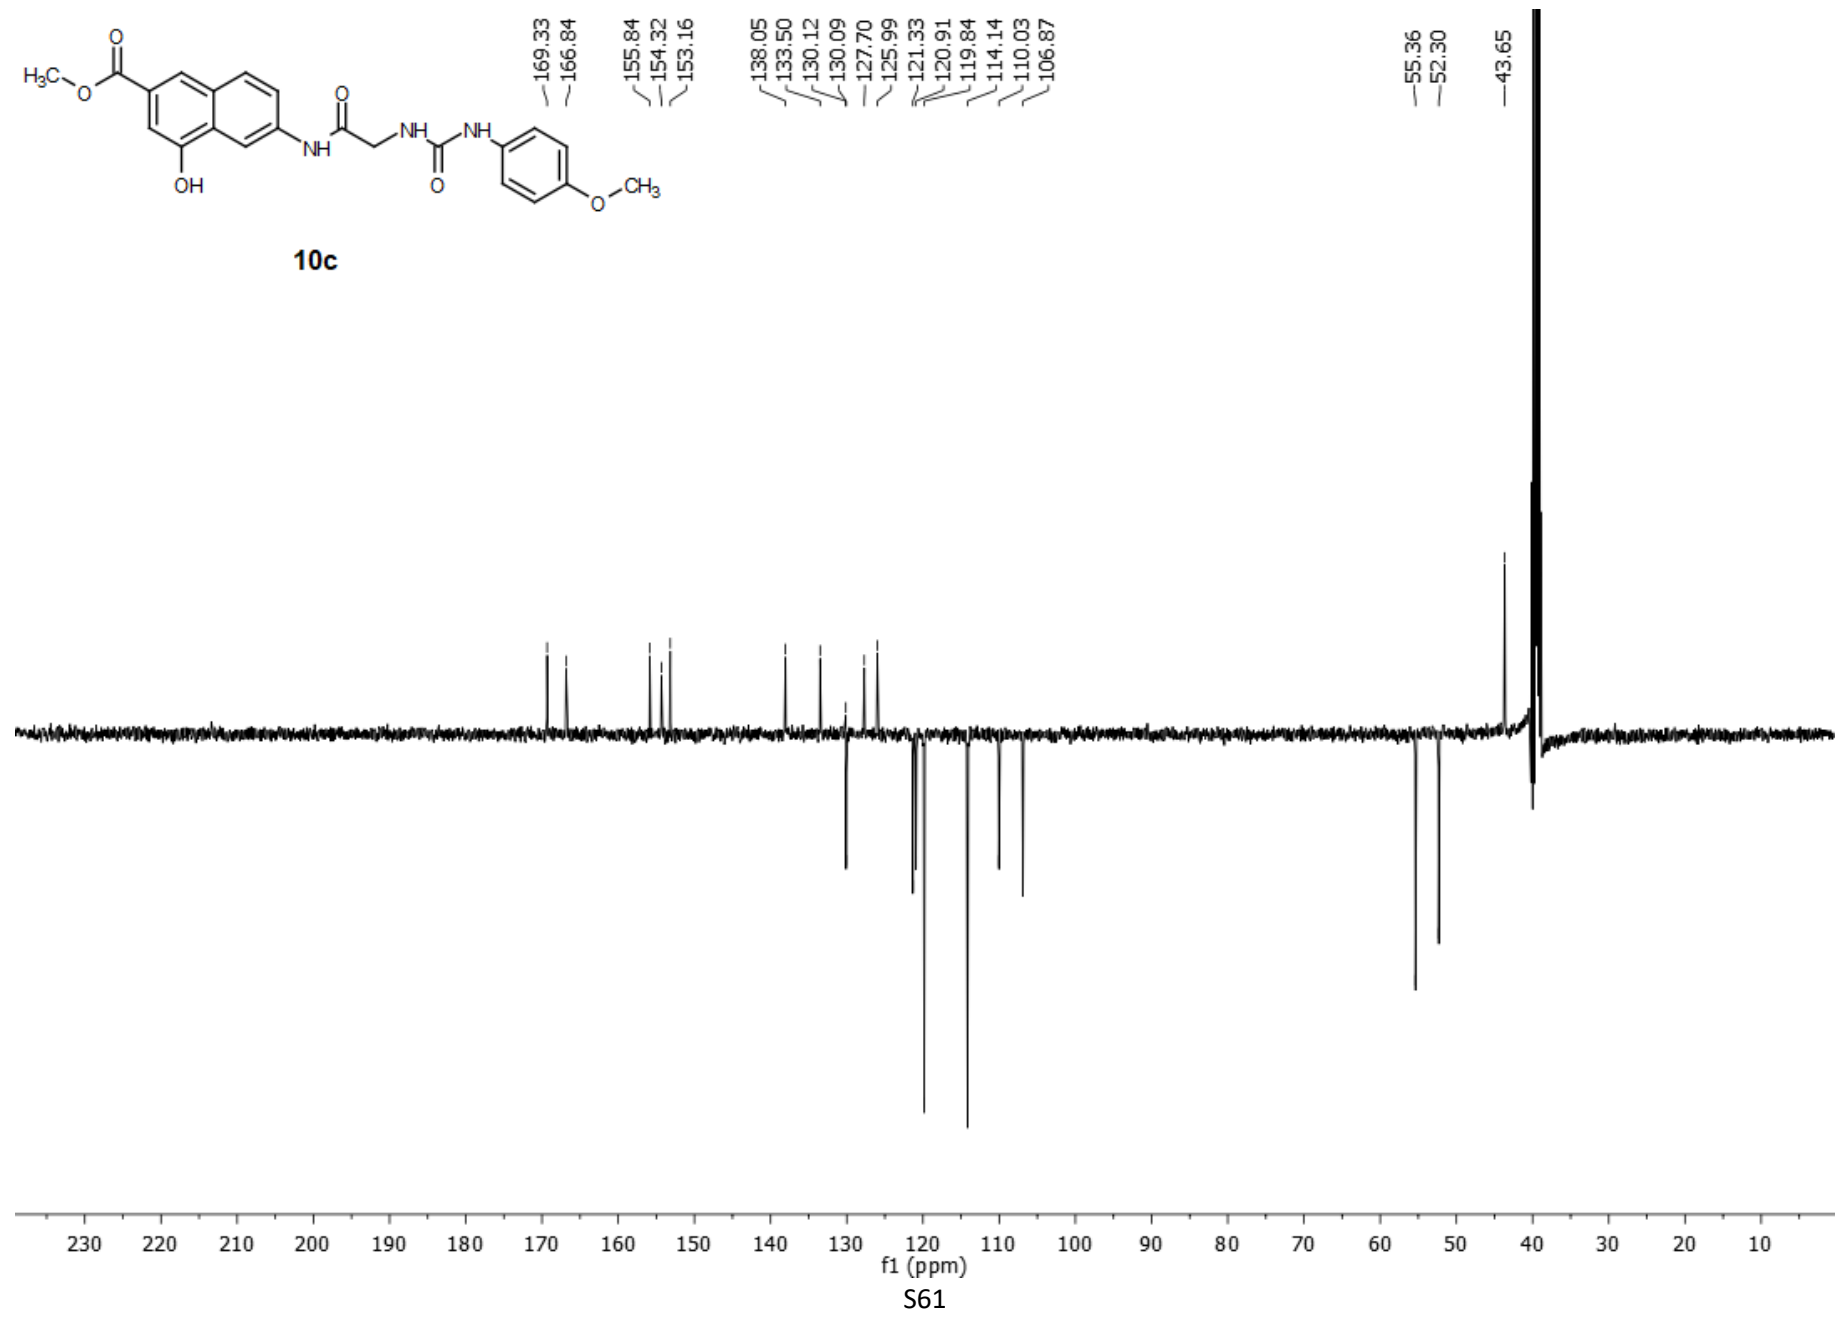

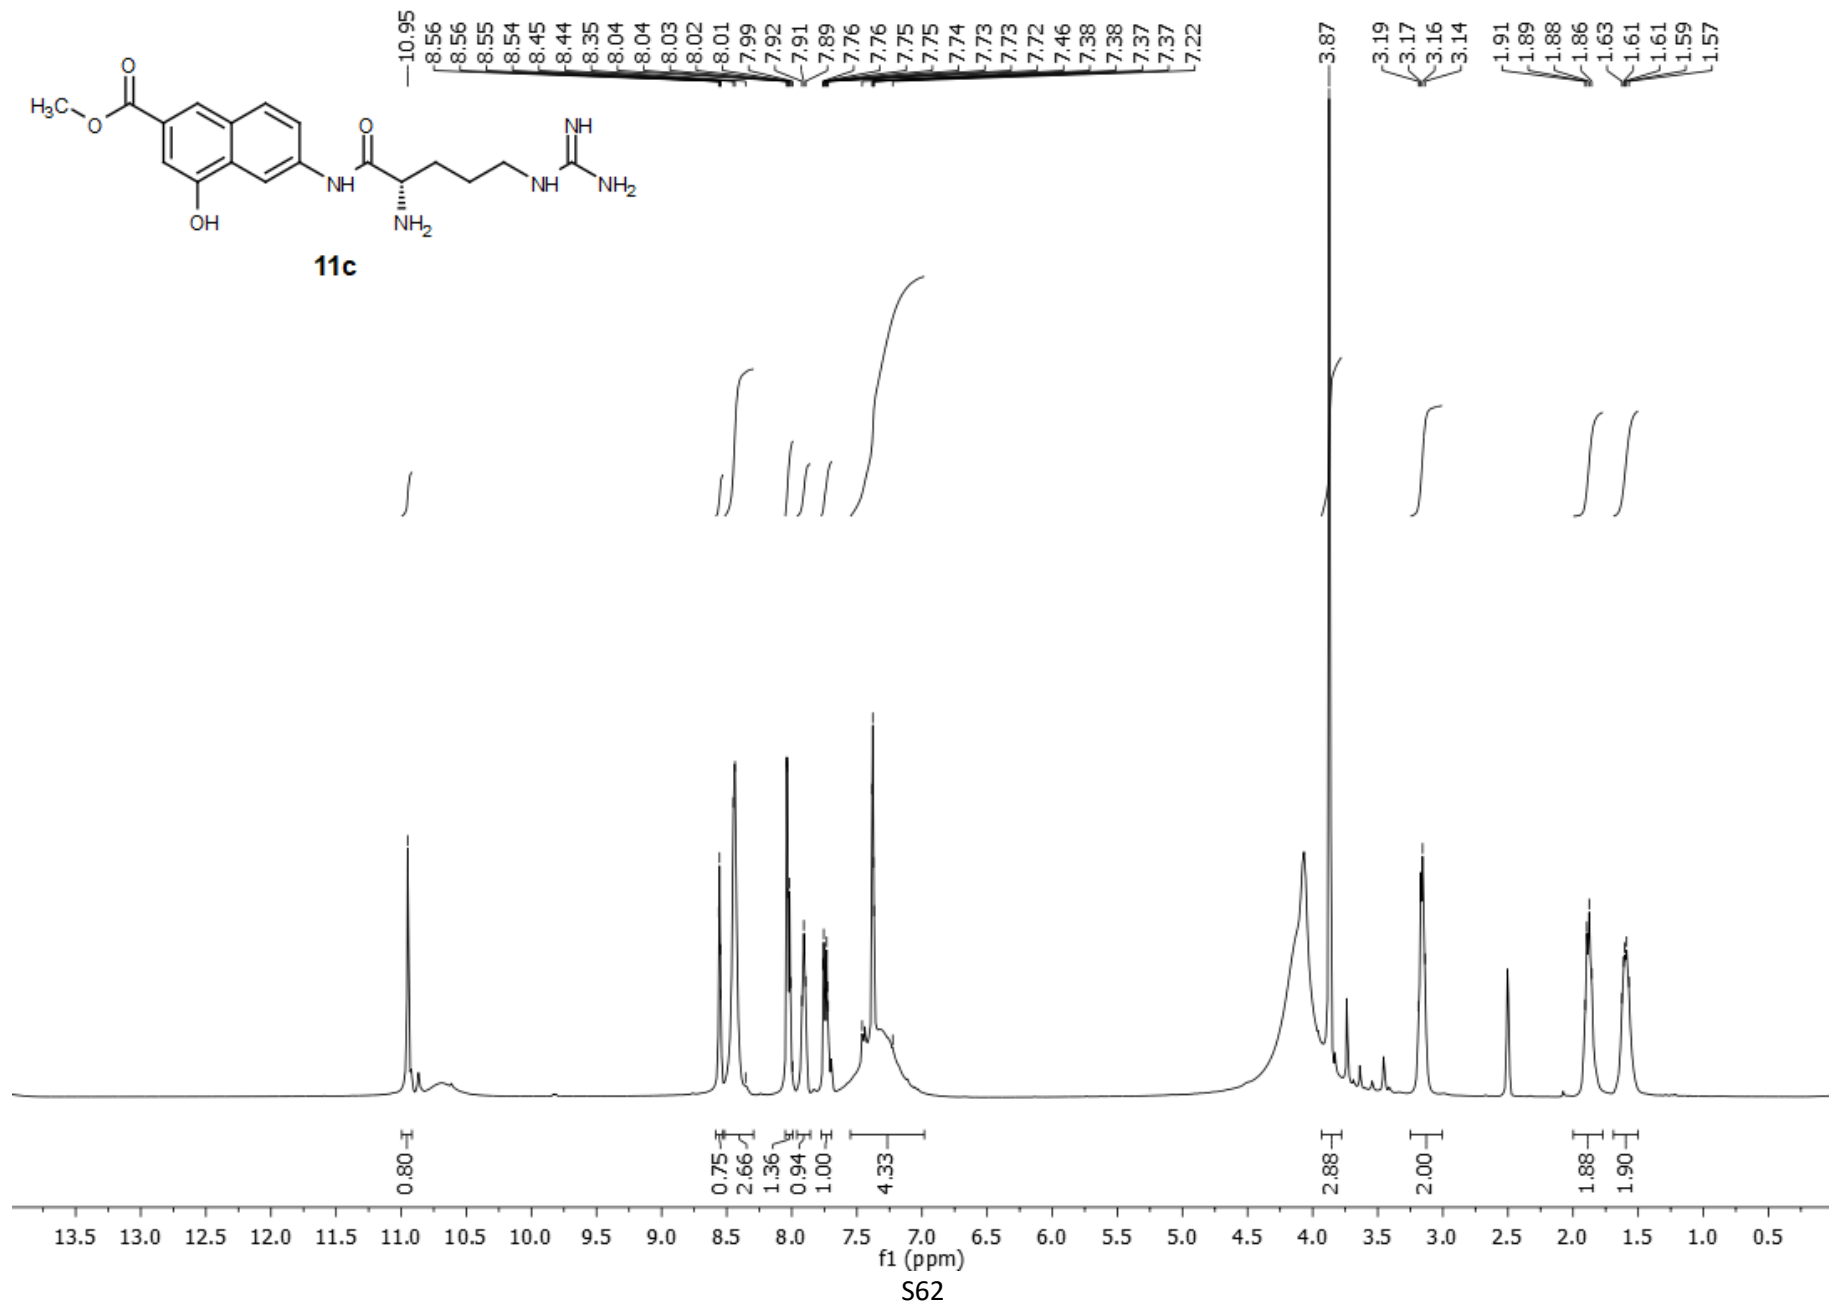

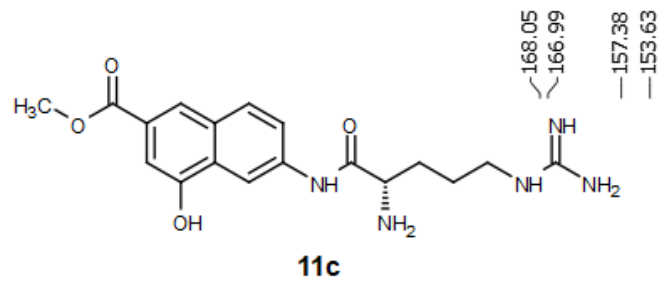

- 168.05
- 166.99
- 157.38
- 153.63
- 137.38
- 130.83
- 130.55
- 127.80
- 126.79
- 121.45
- 121.09
- 111.11
- 107.36
- 53.32
- 52.53
- 40.61
- 28.87
- 24.74

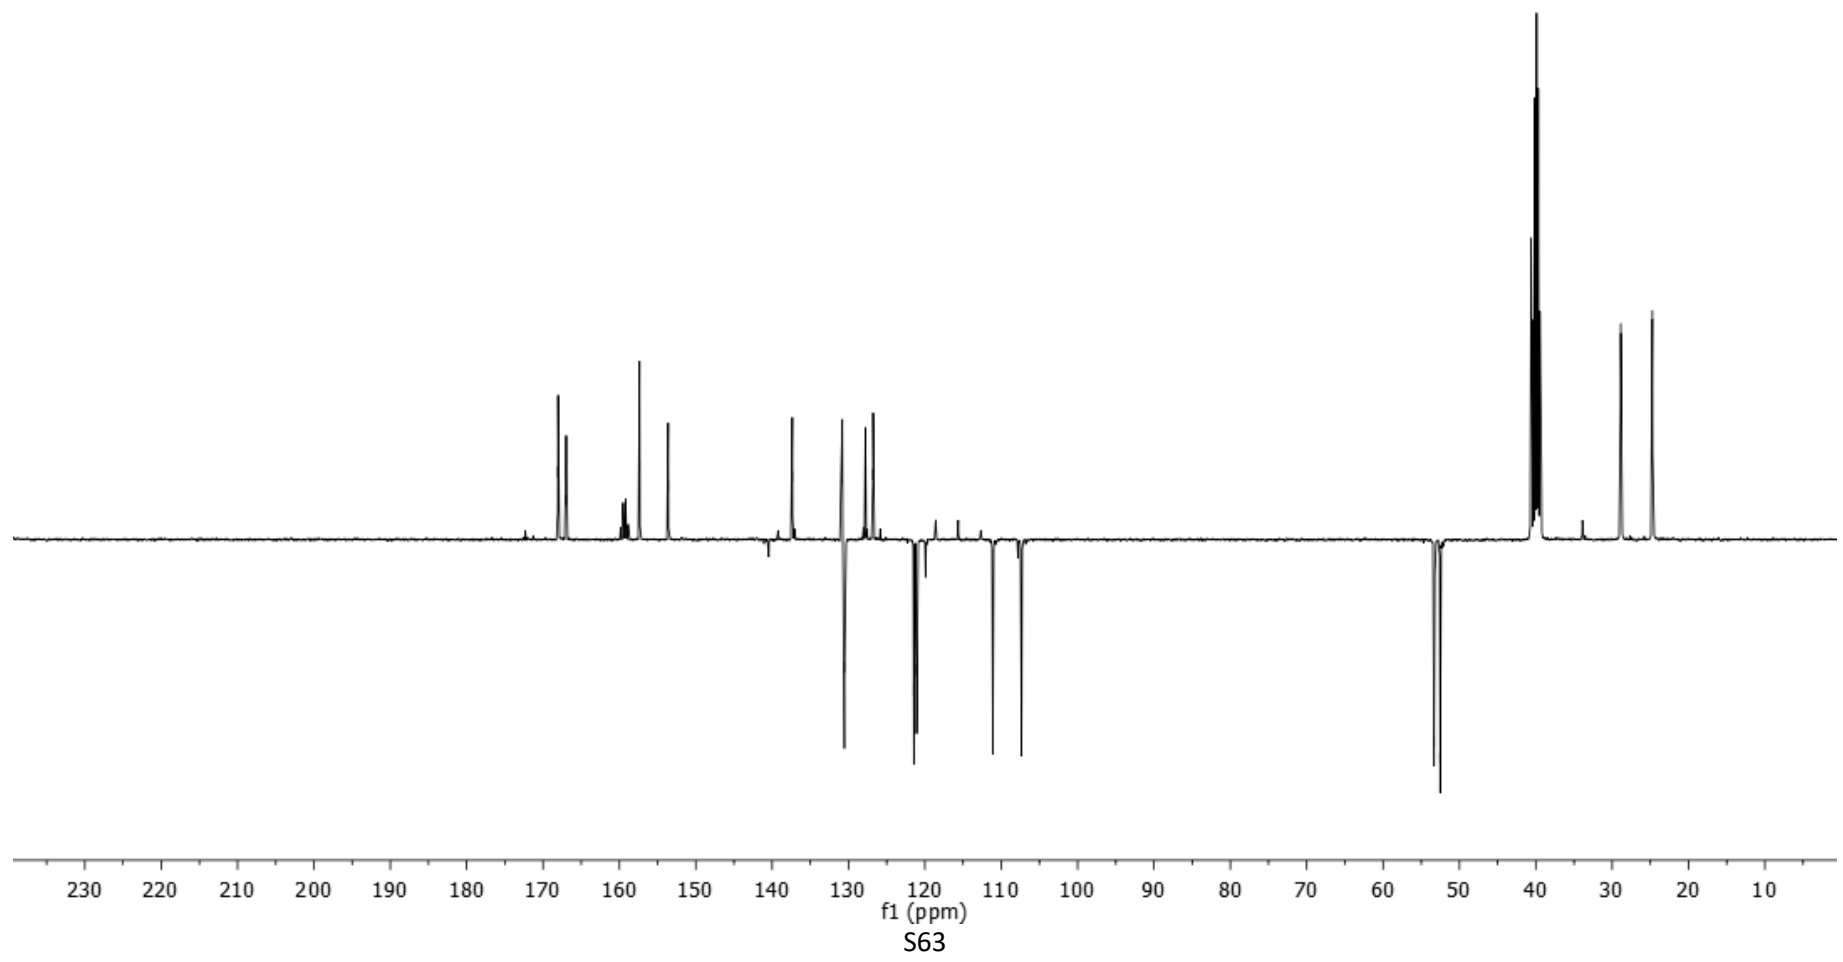

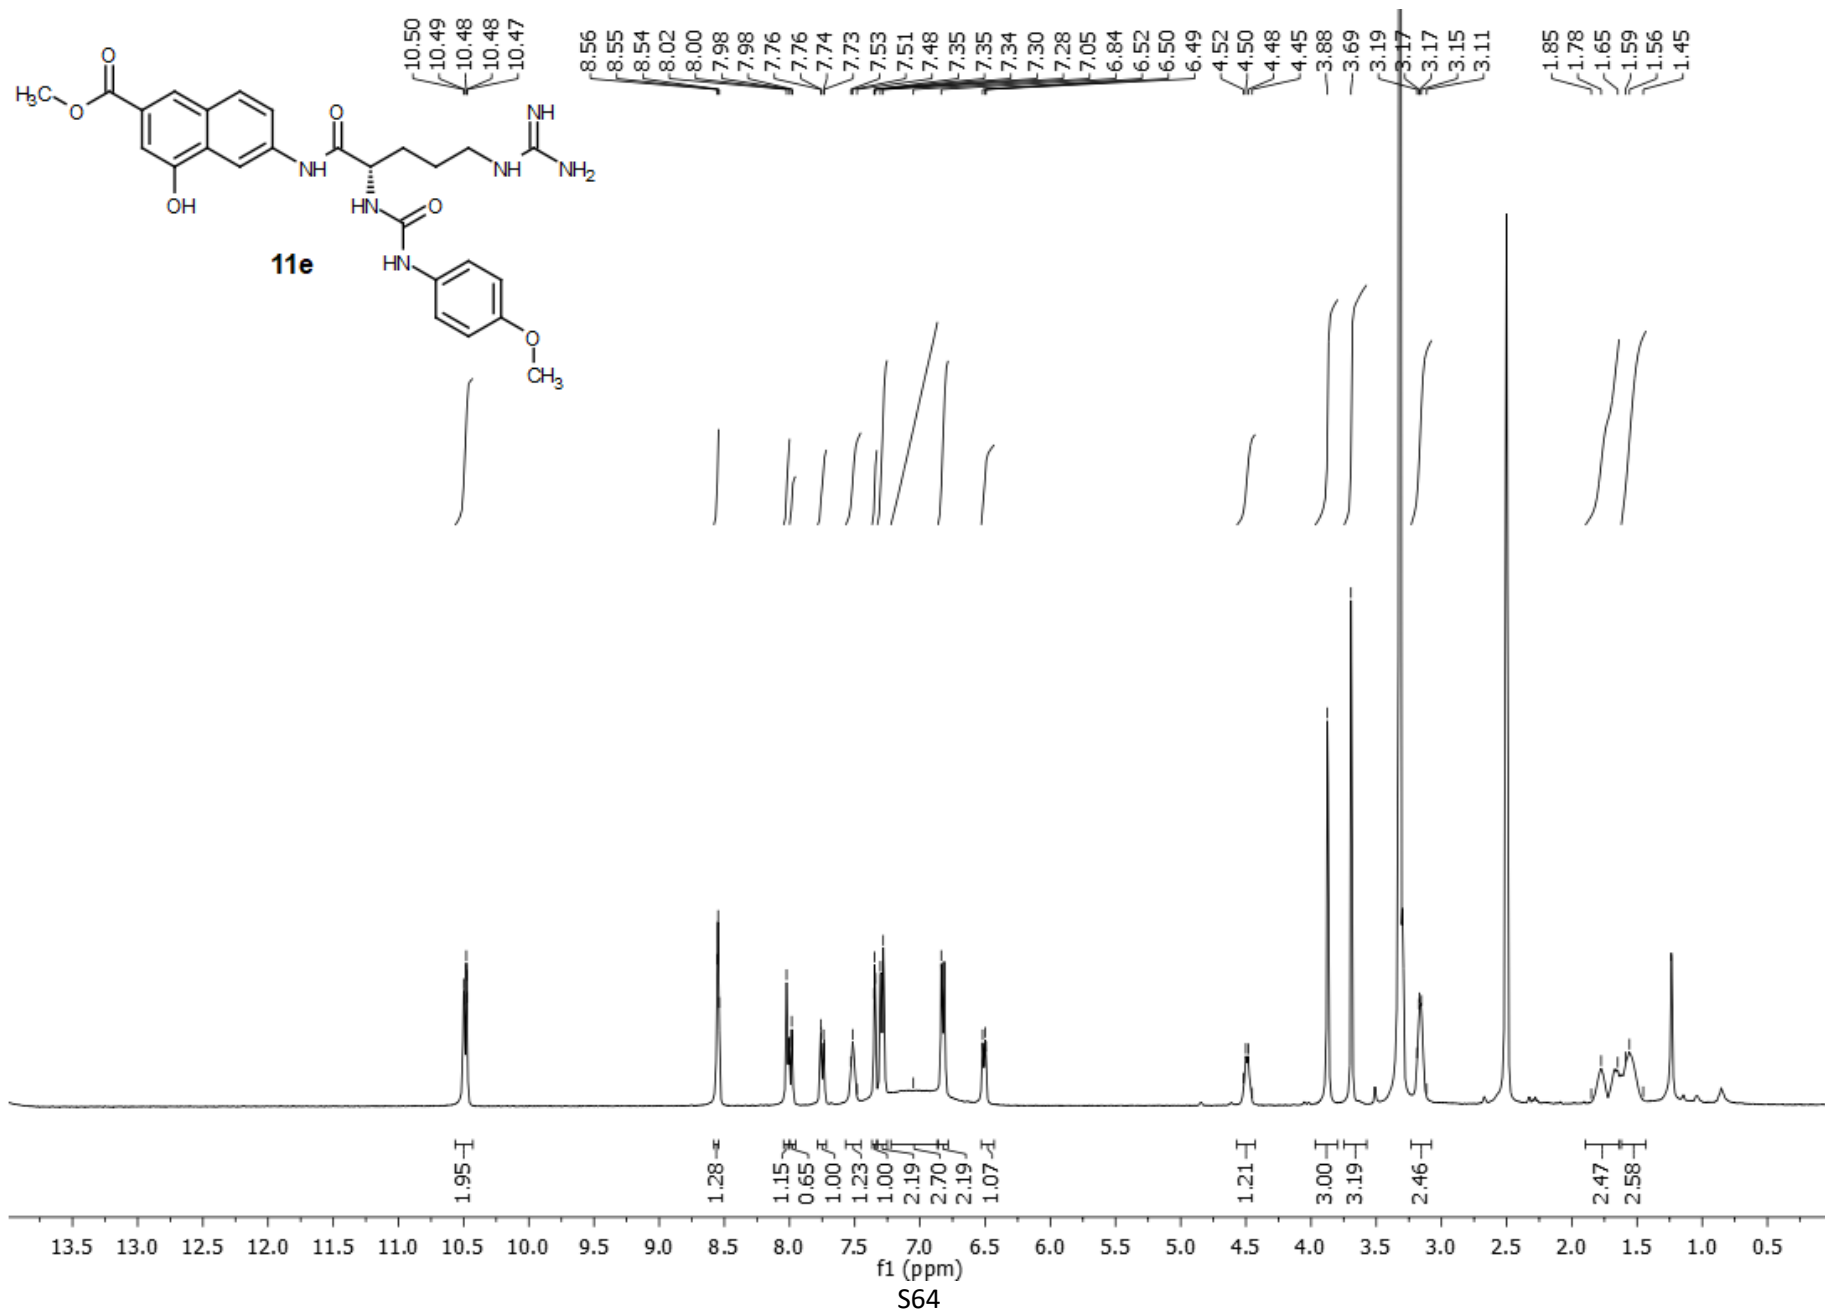

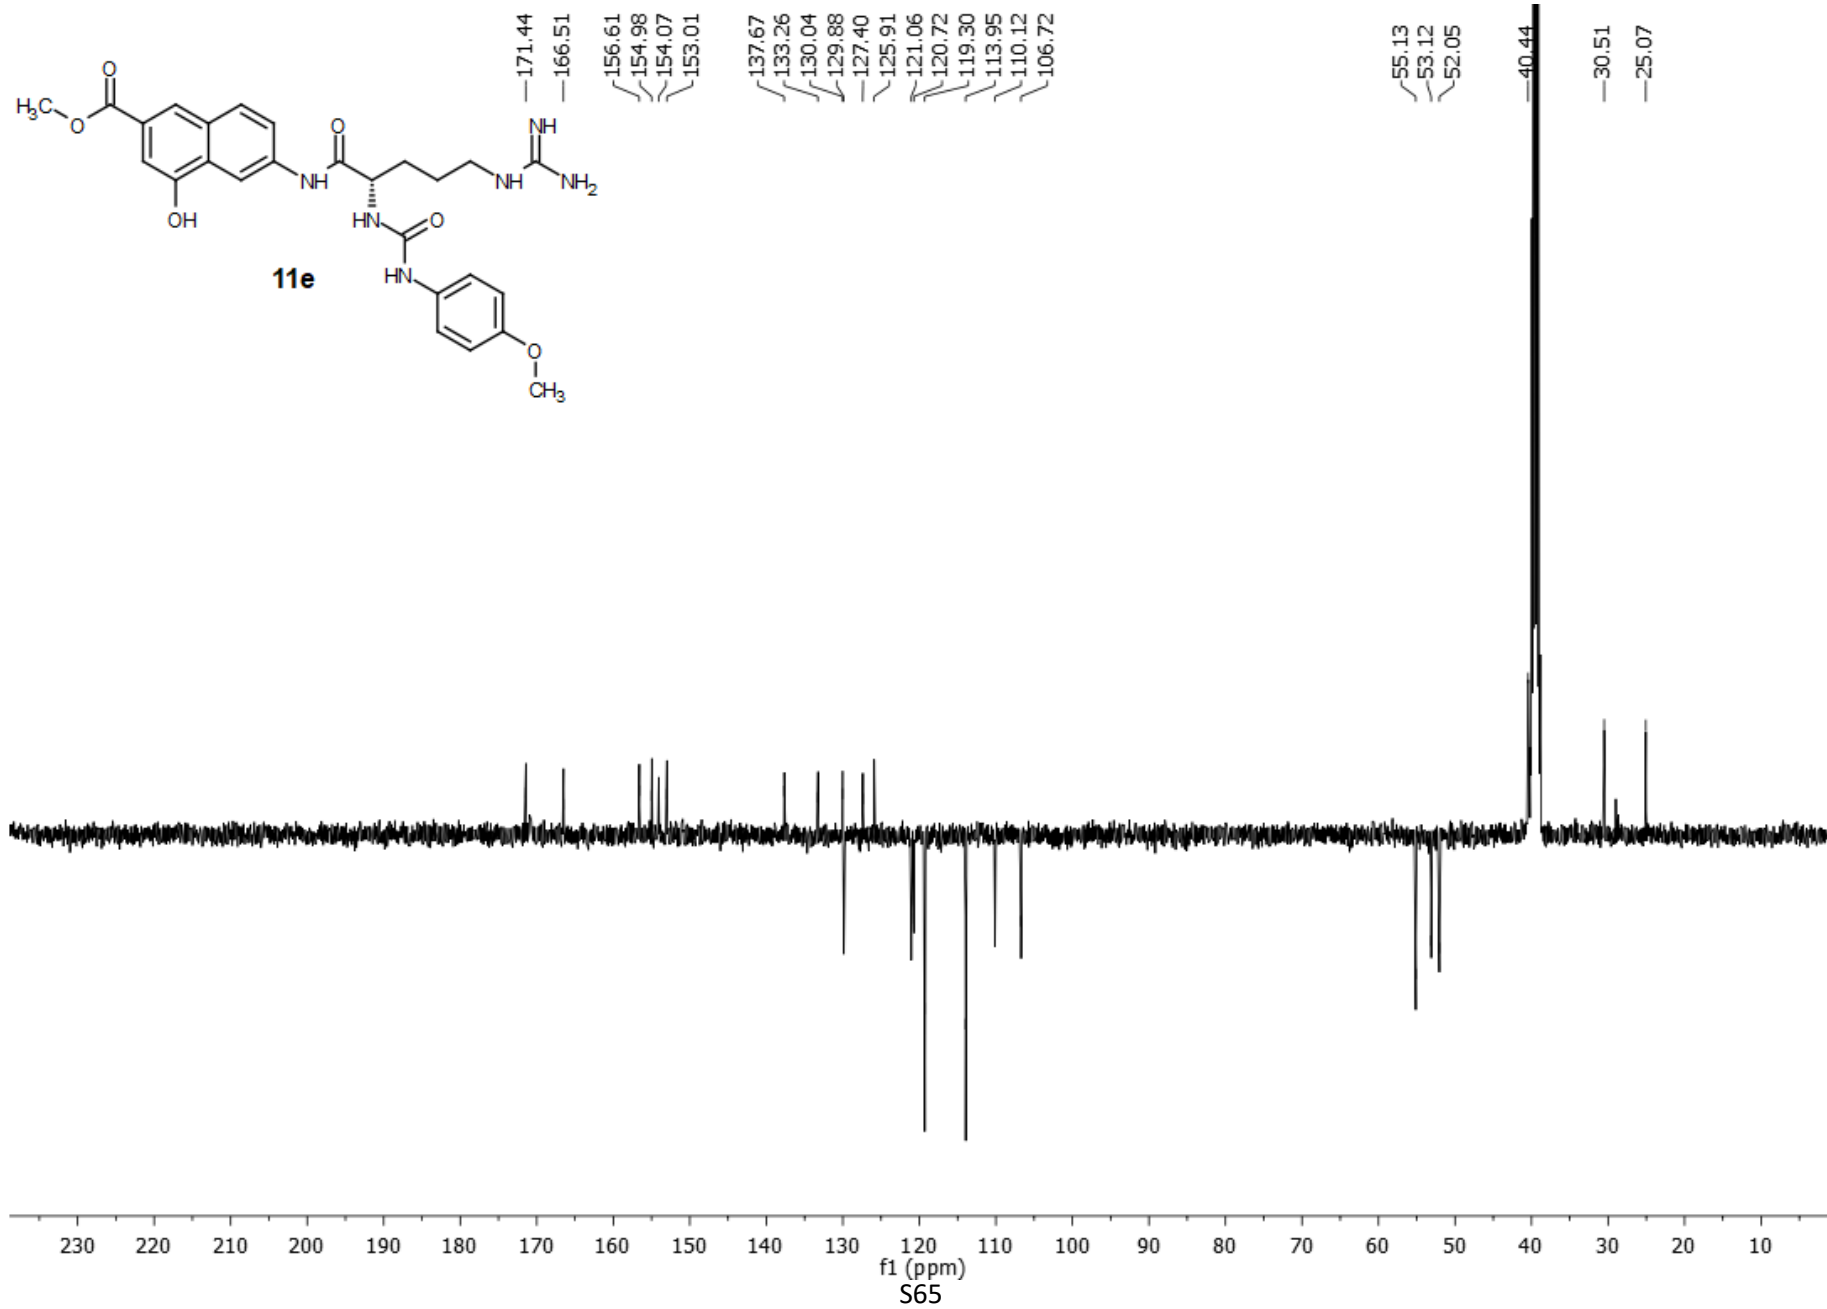

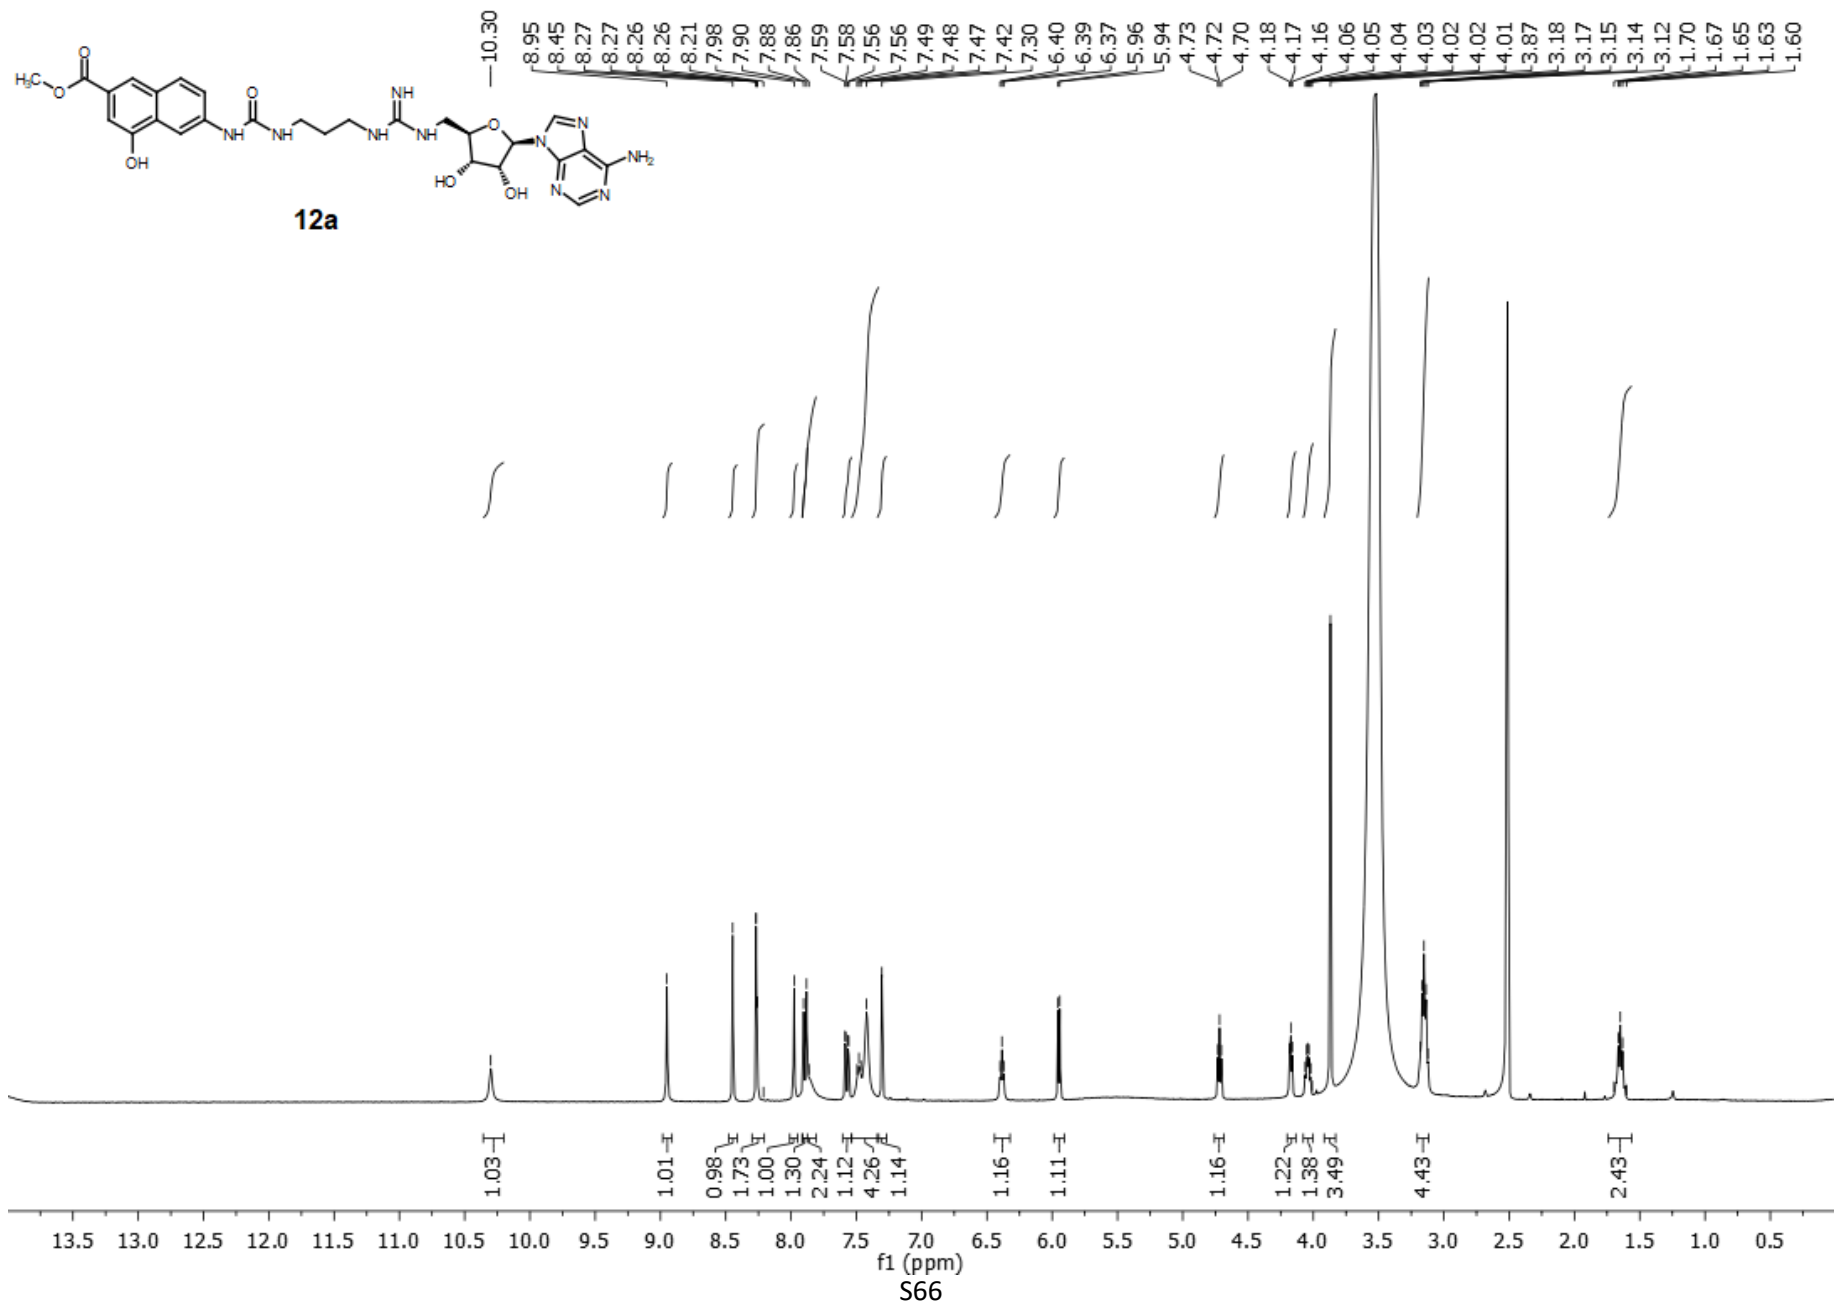

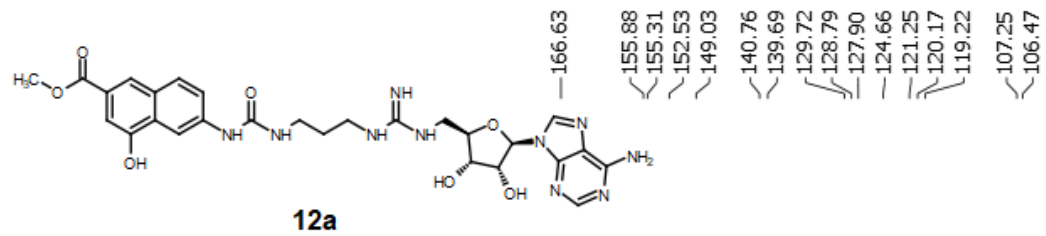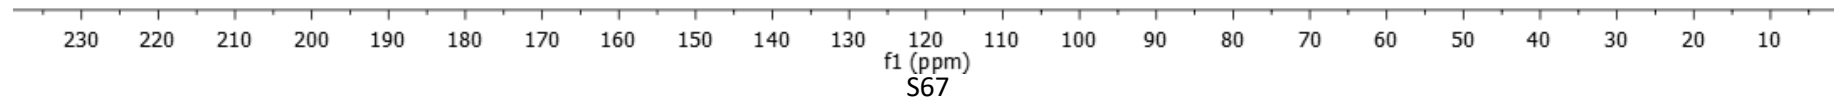

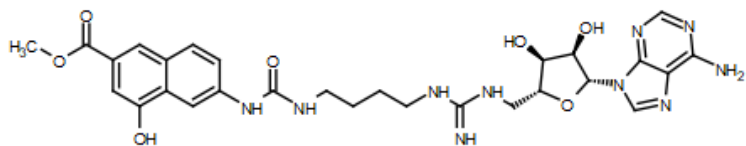

12b

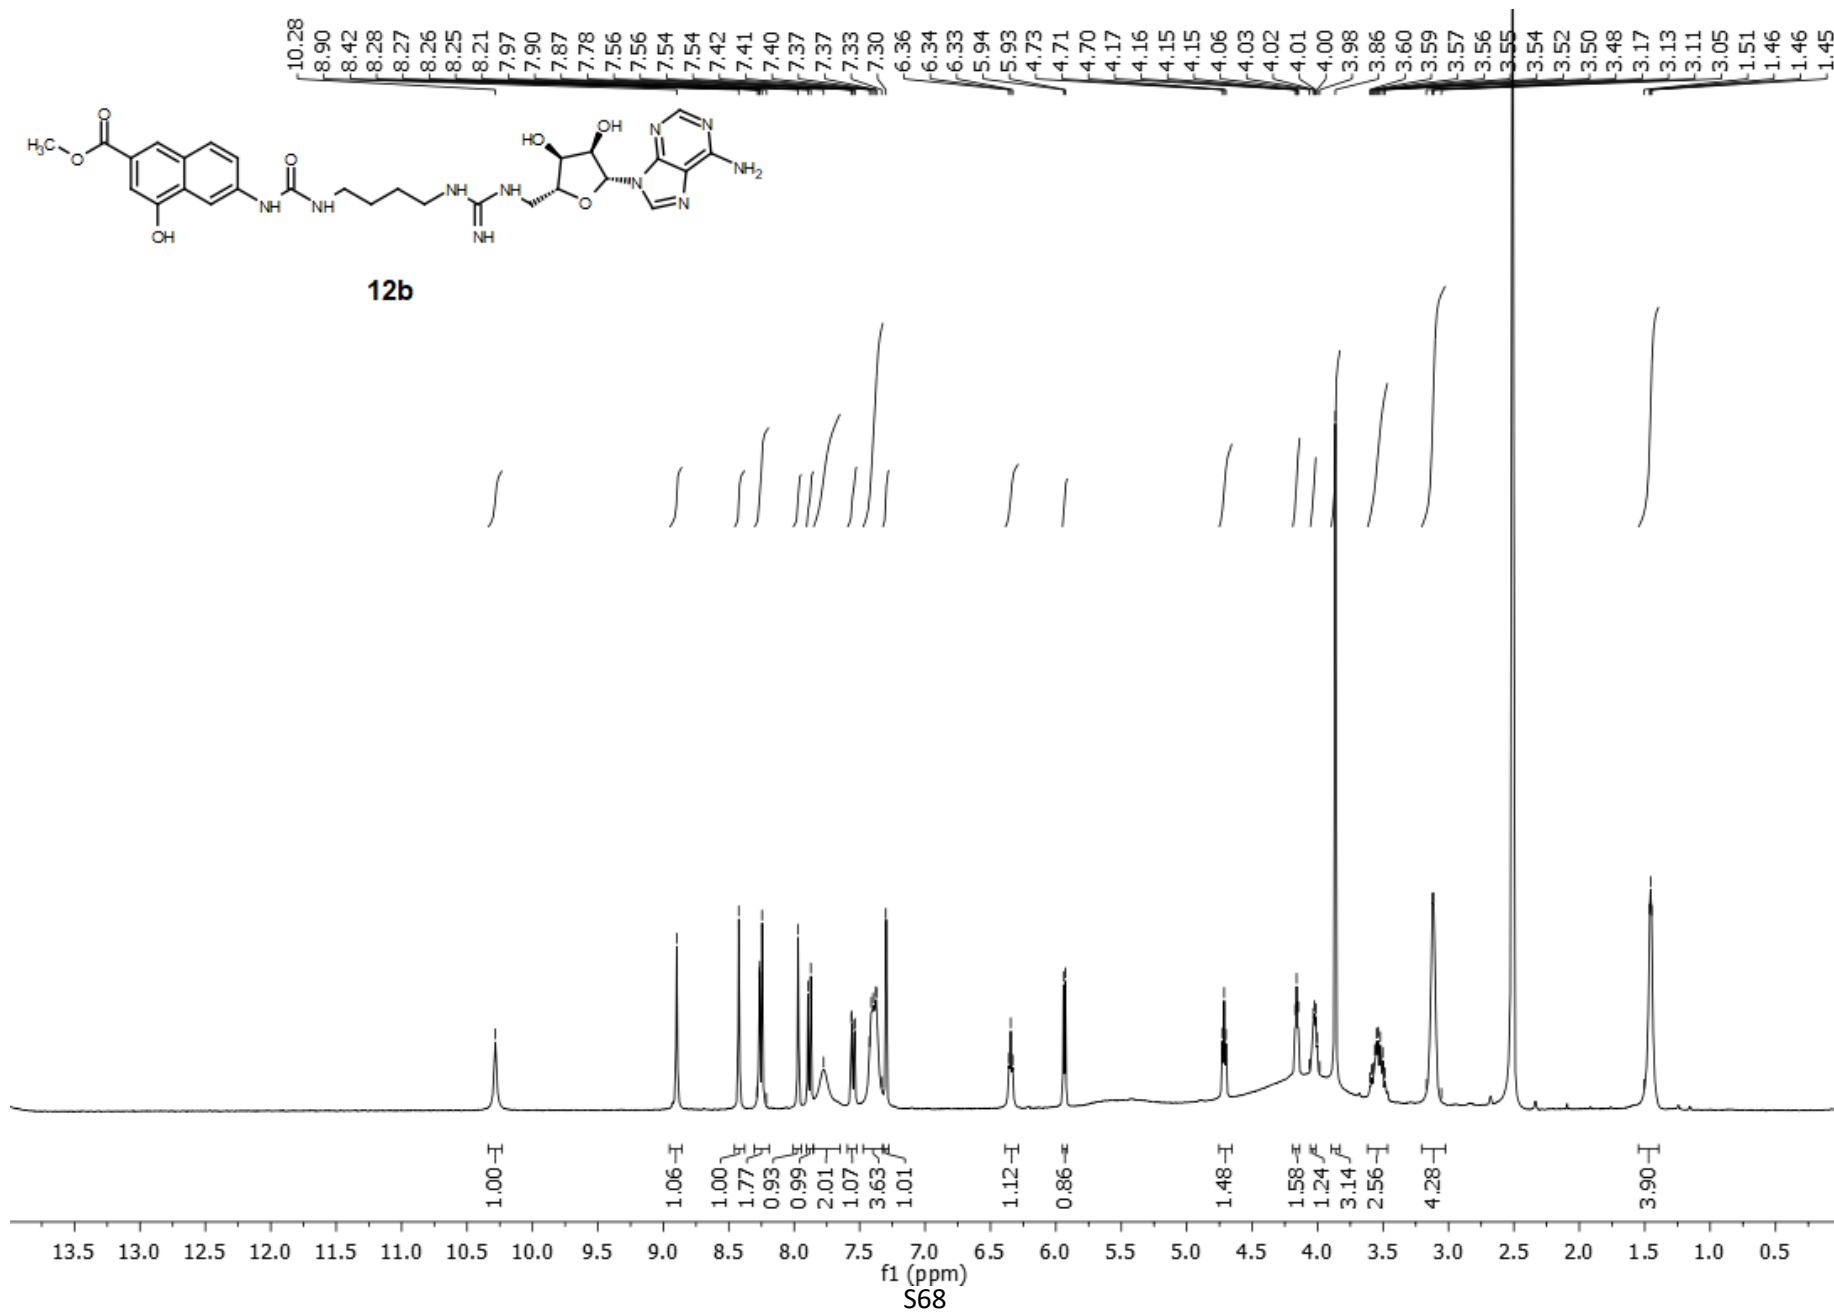



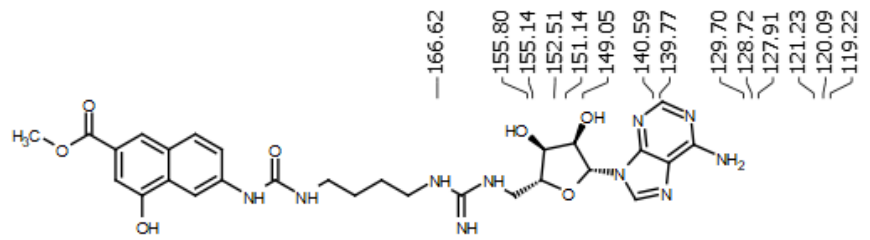

12b

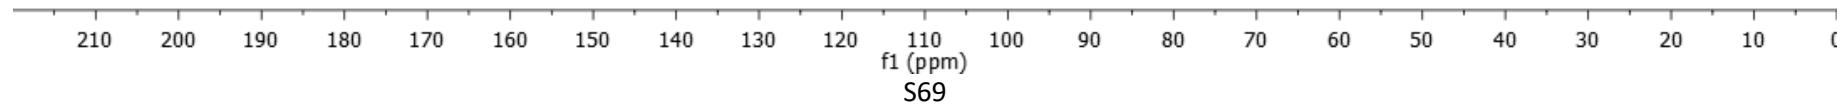

f1 (ppm)  
S69

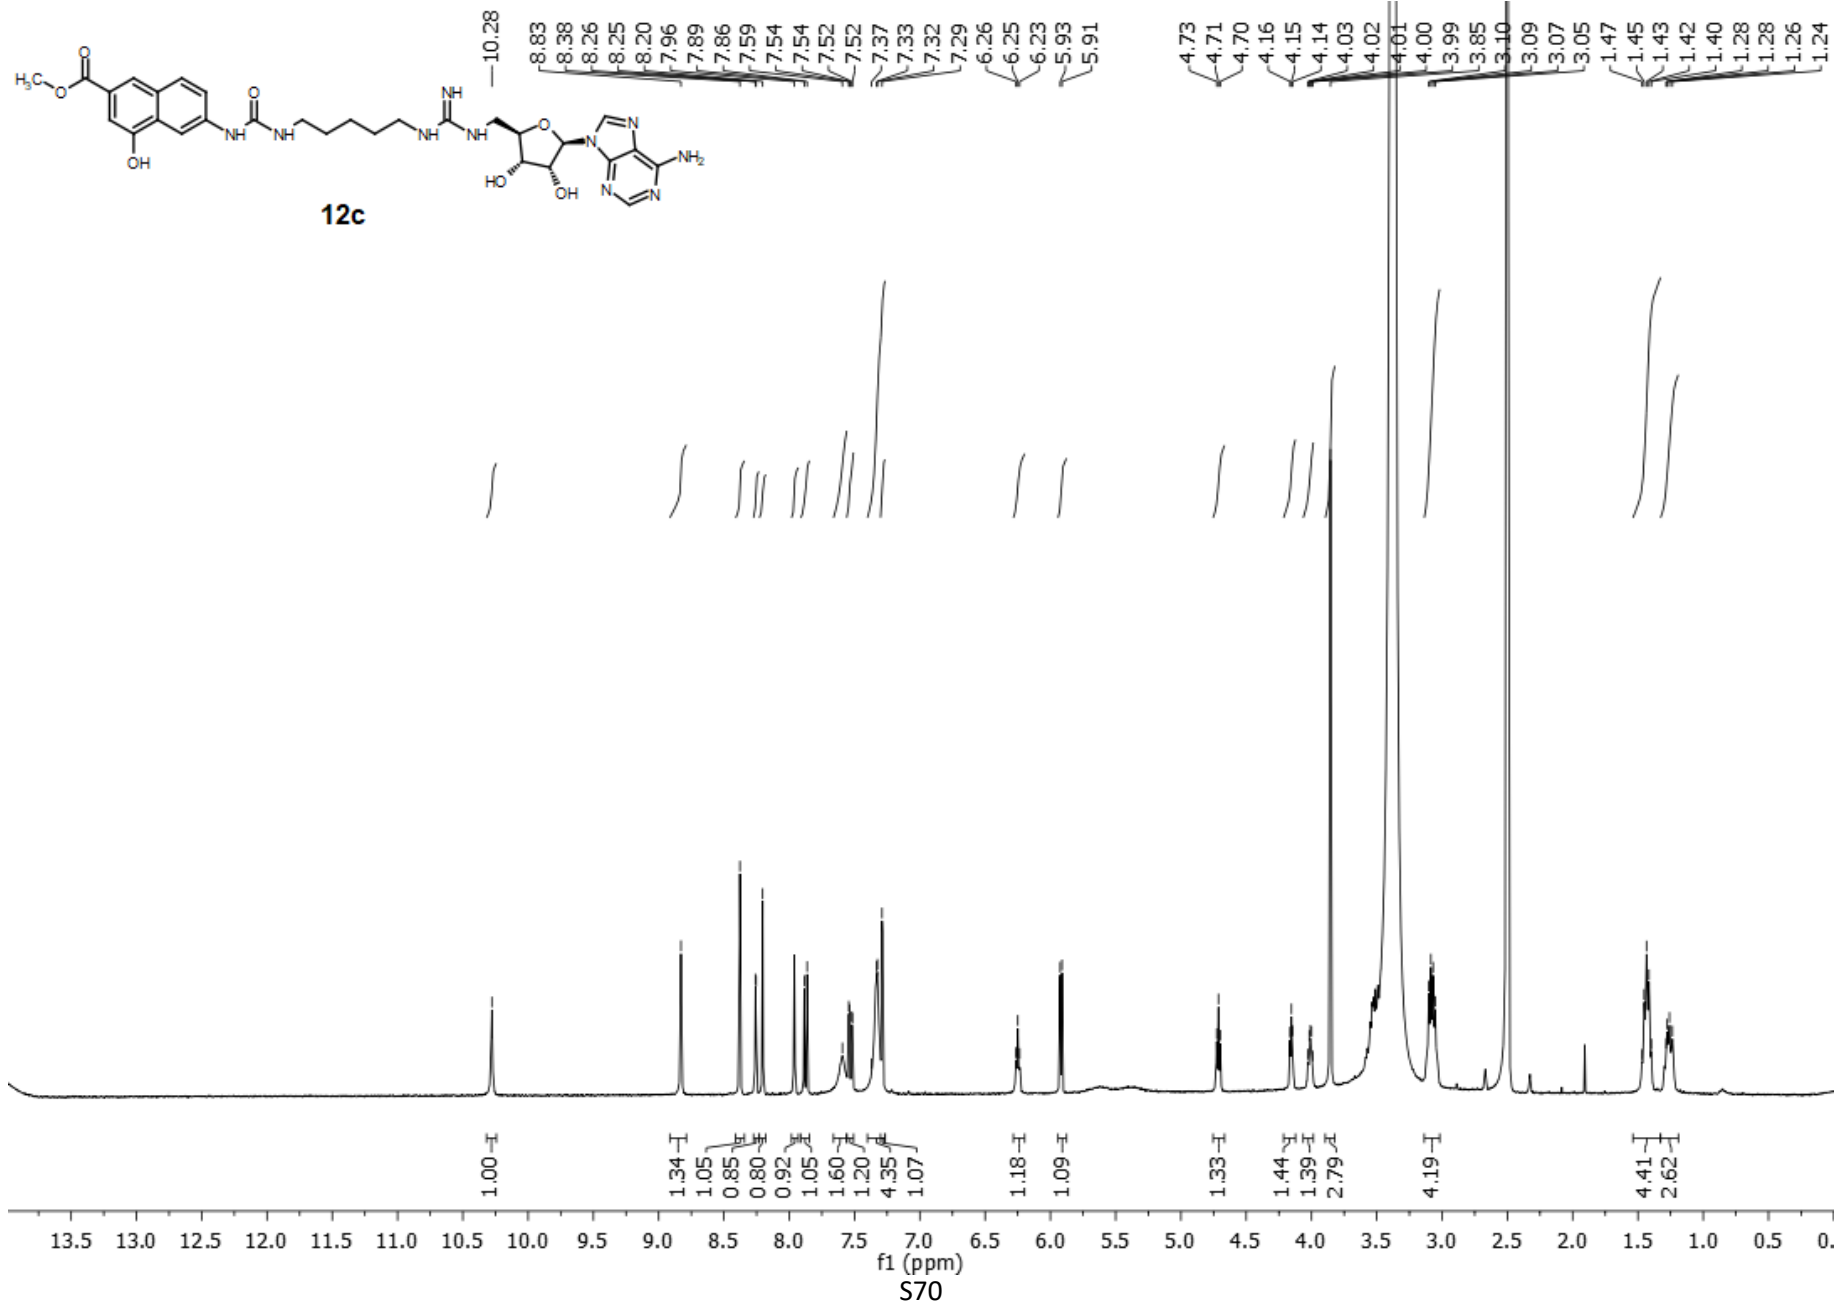

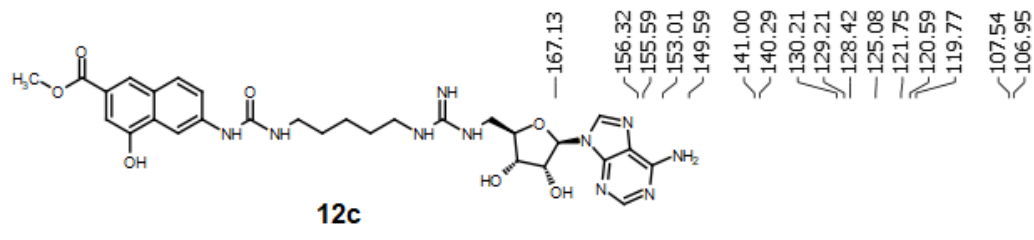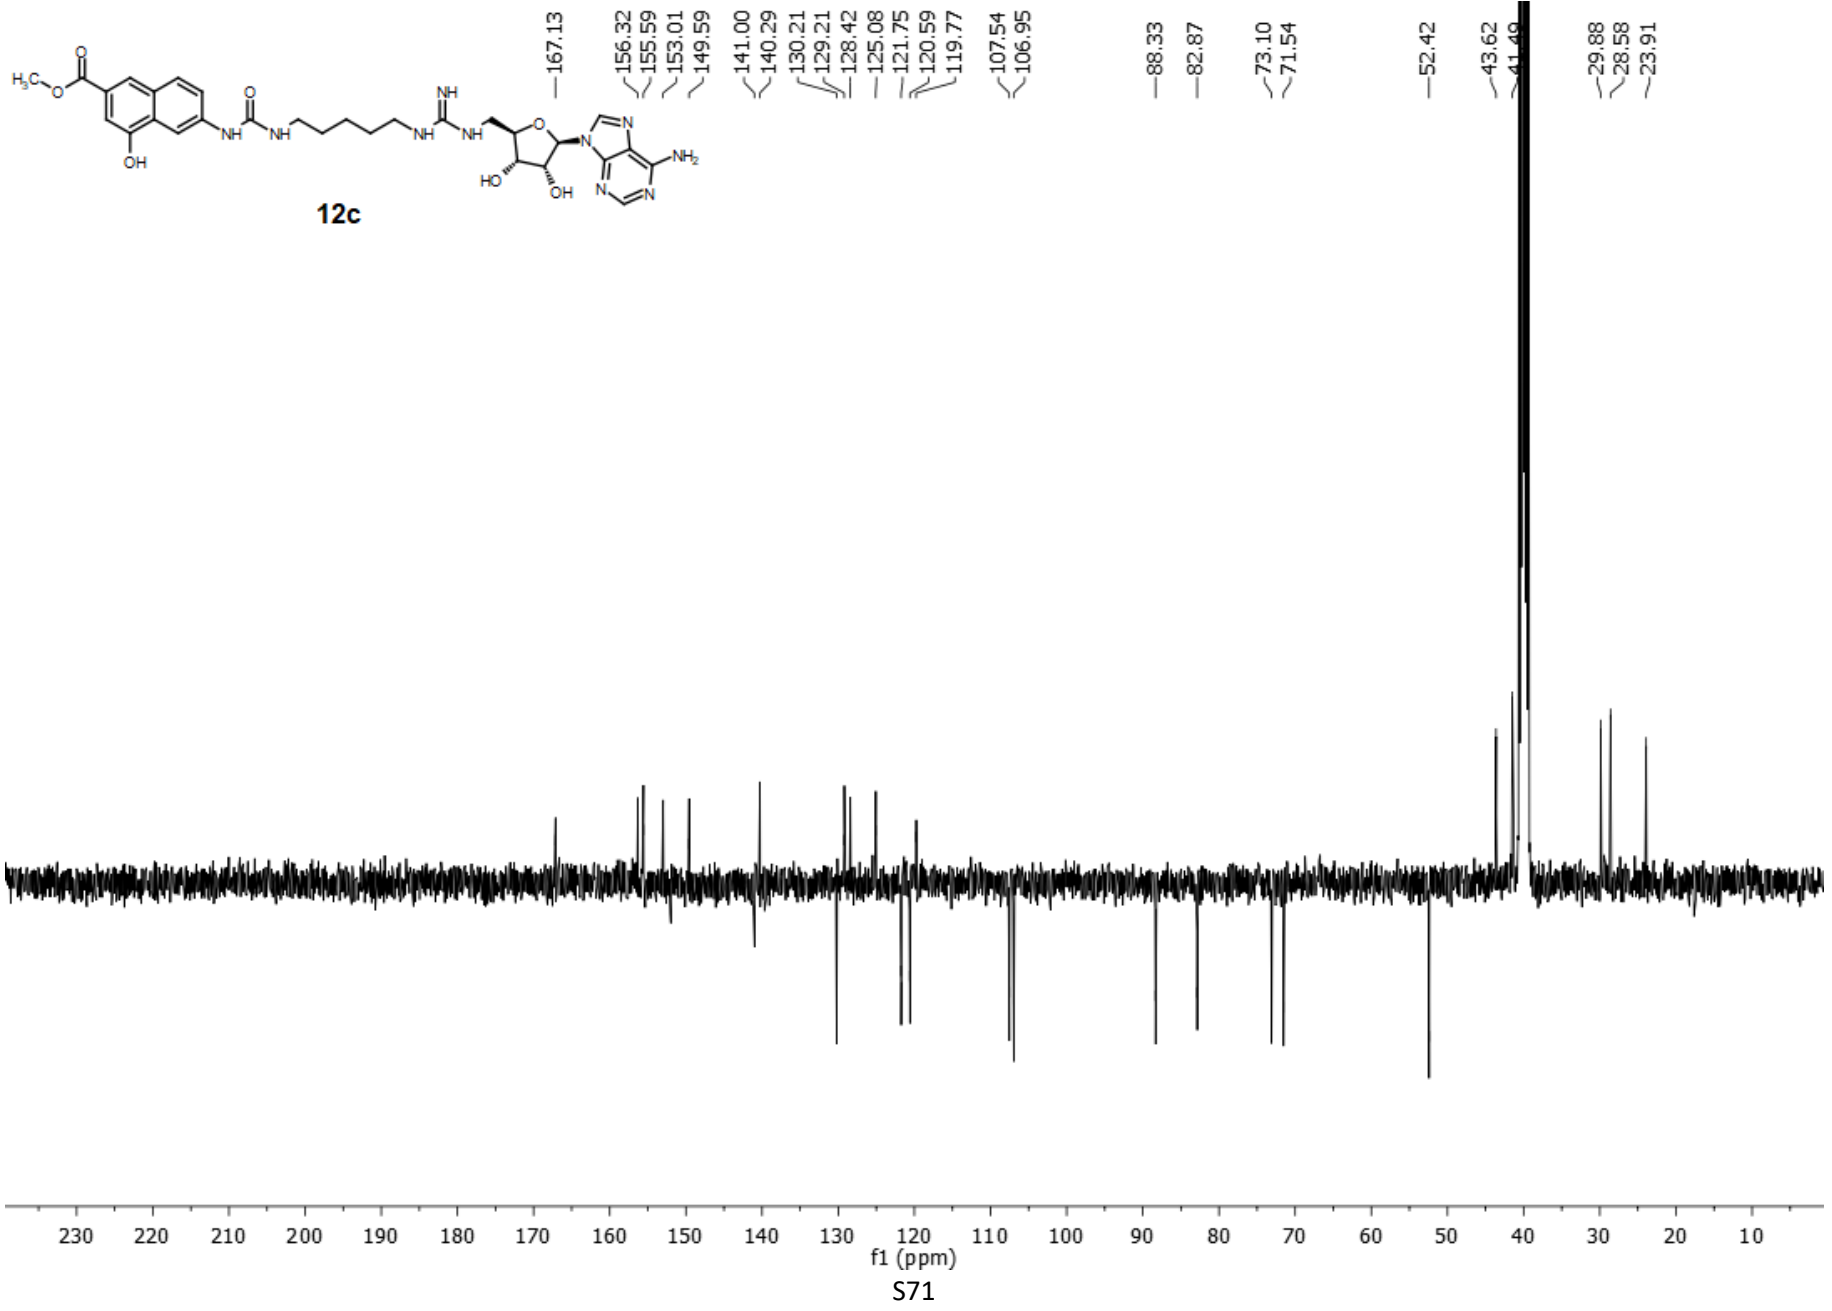

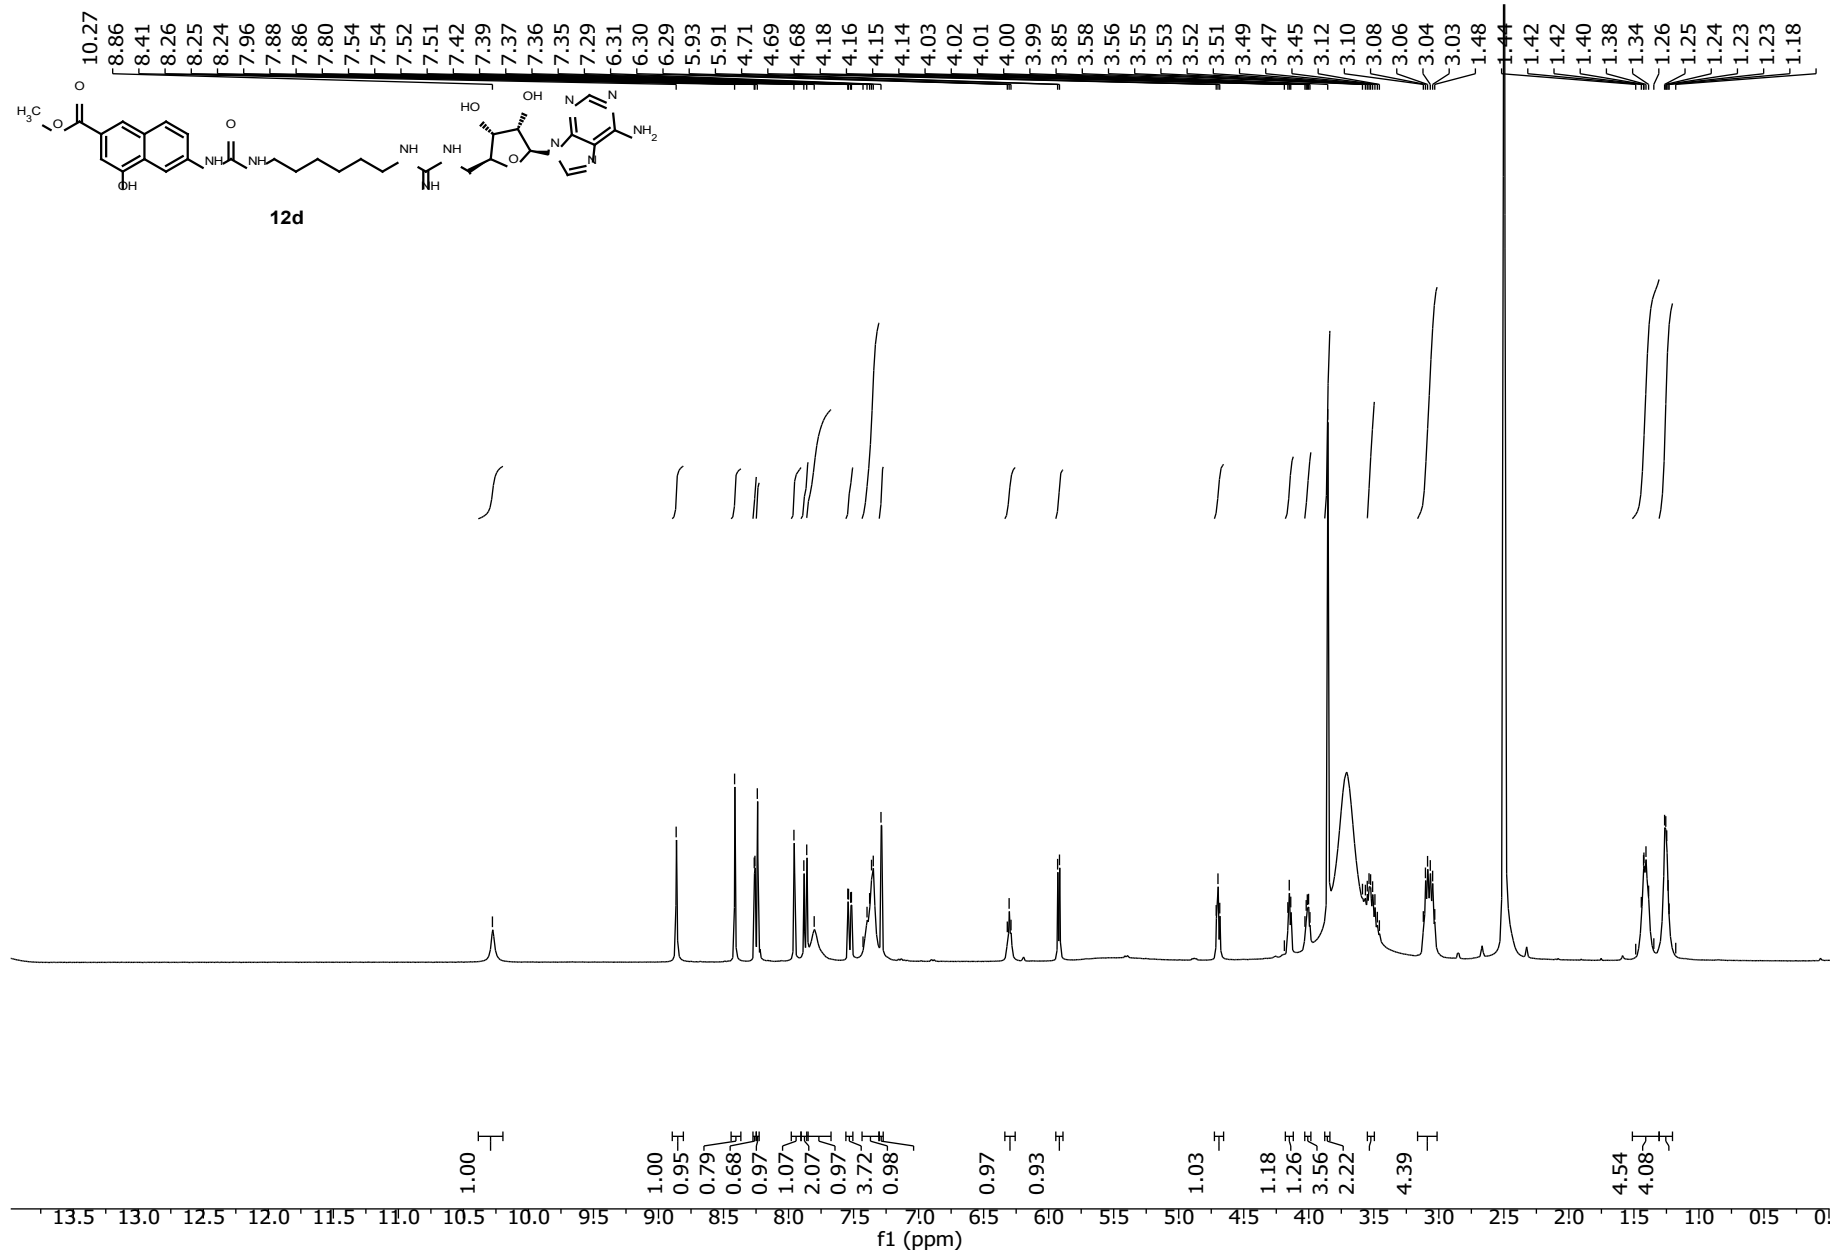

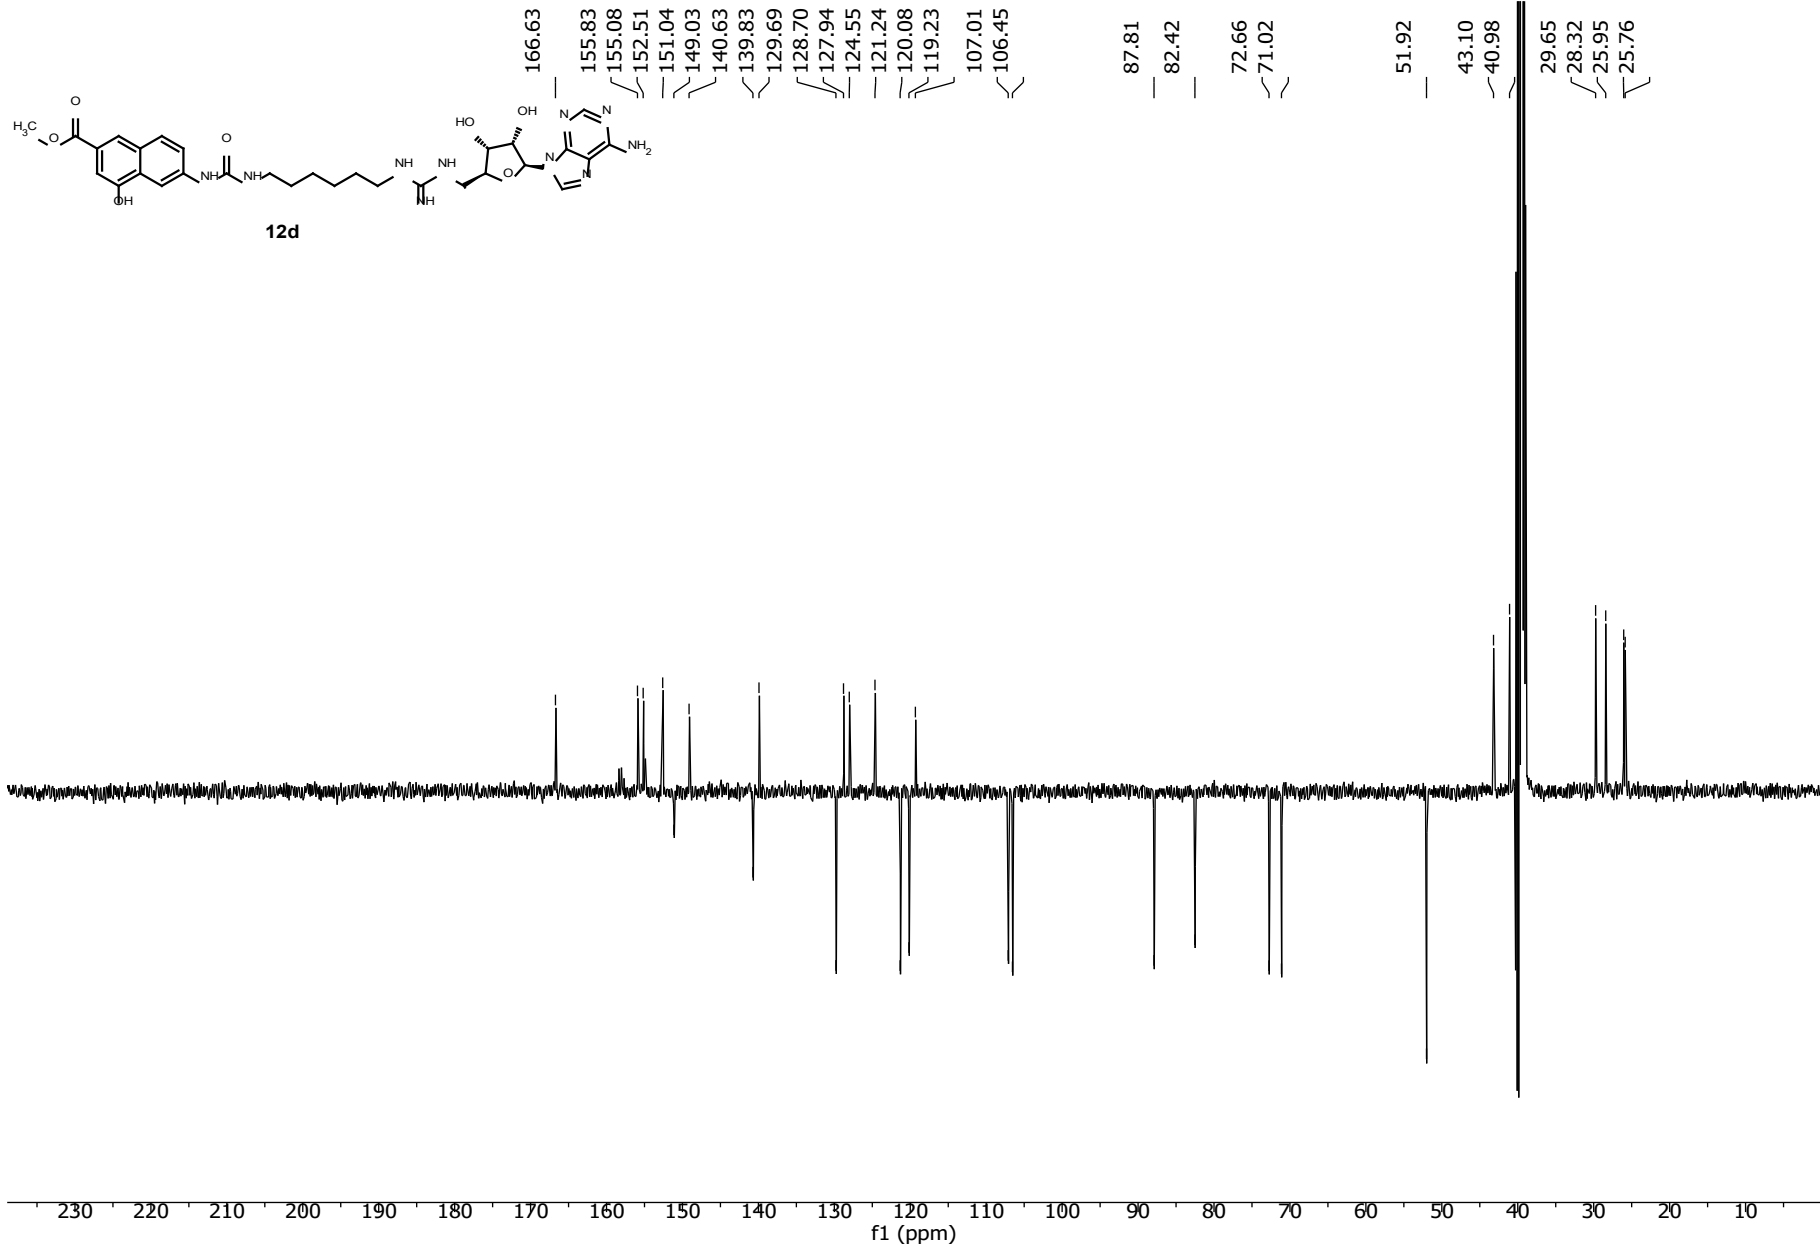

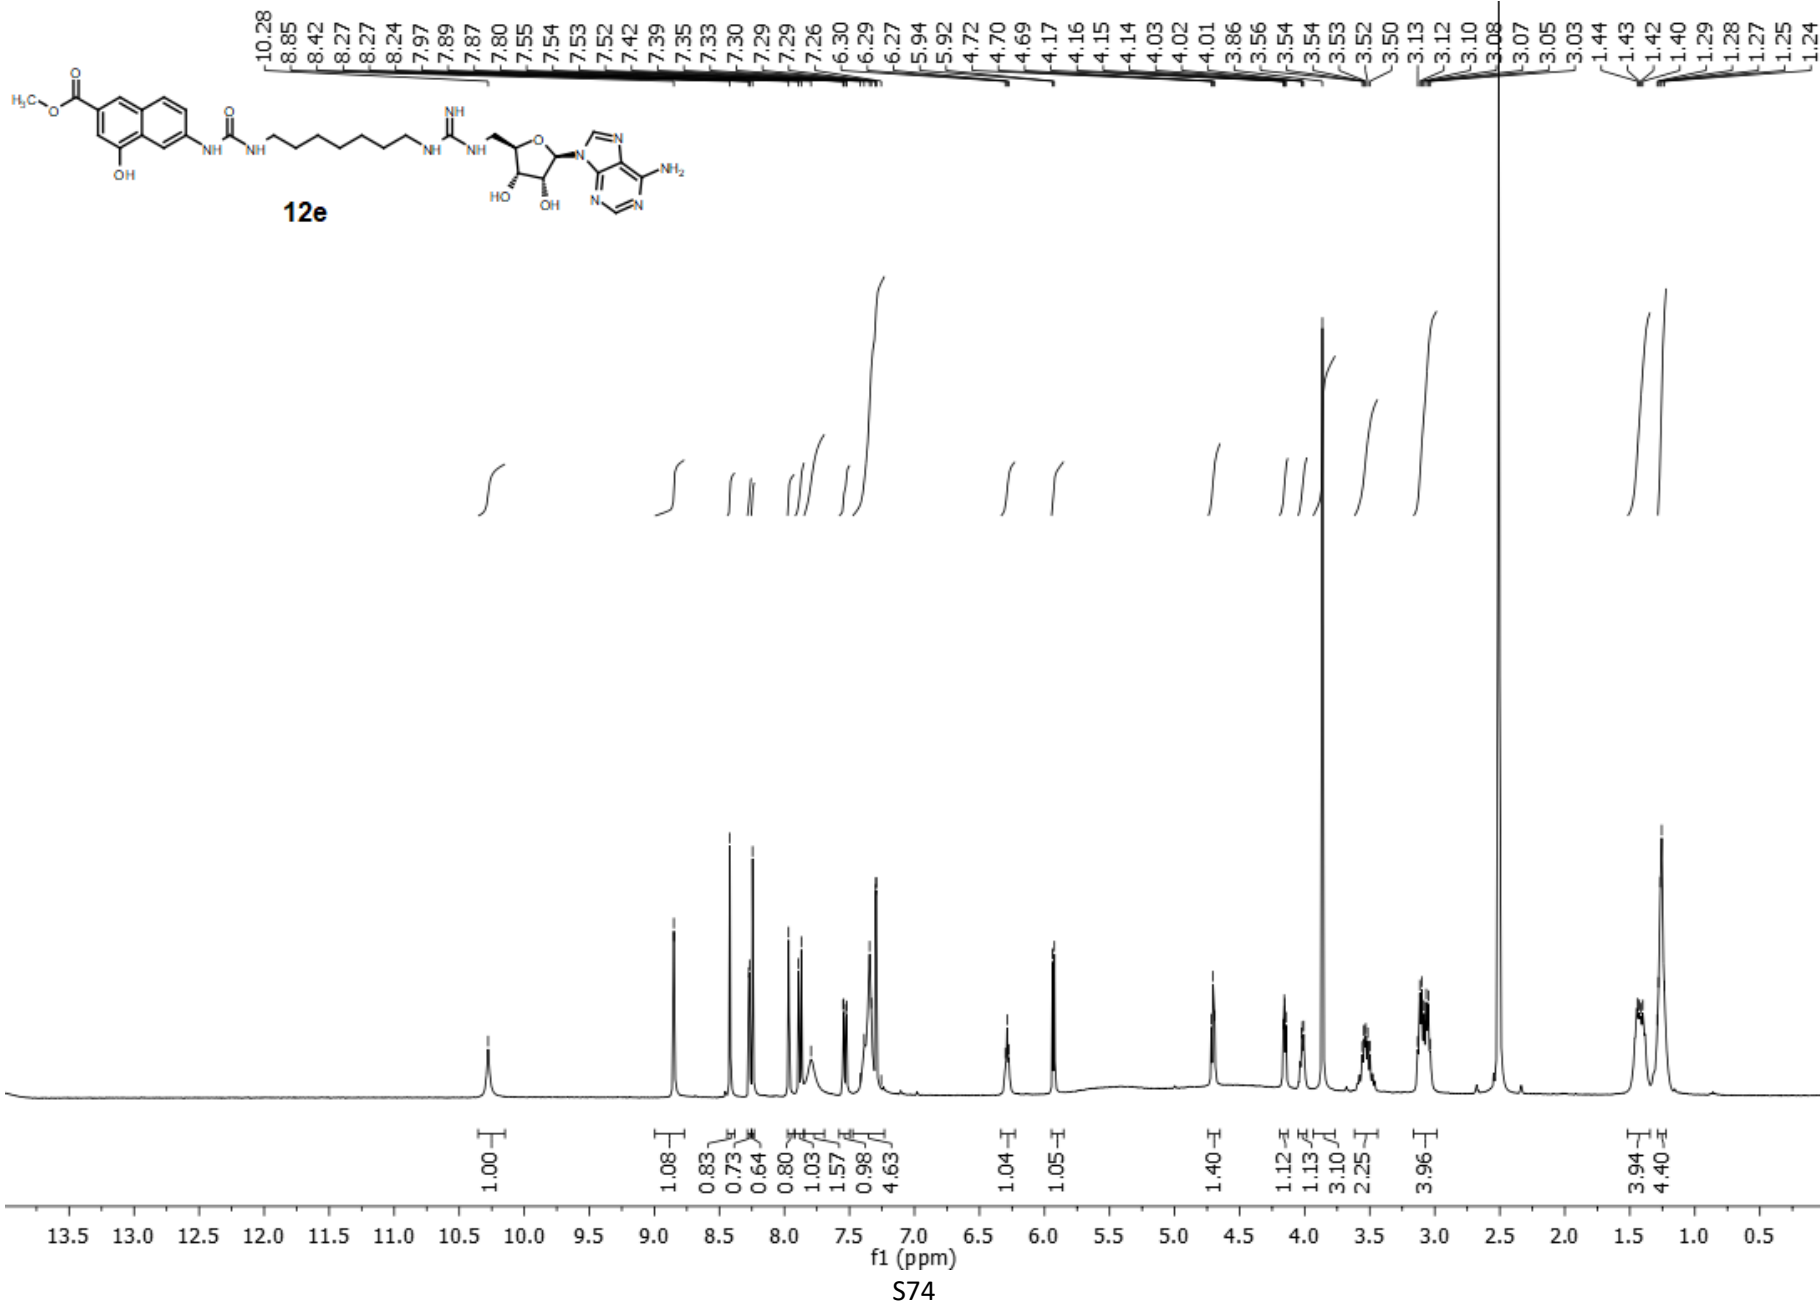

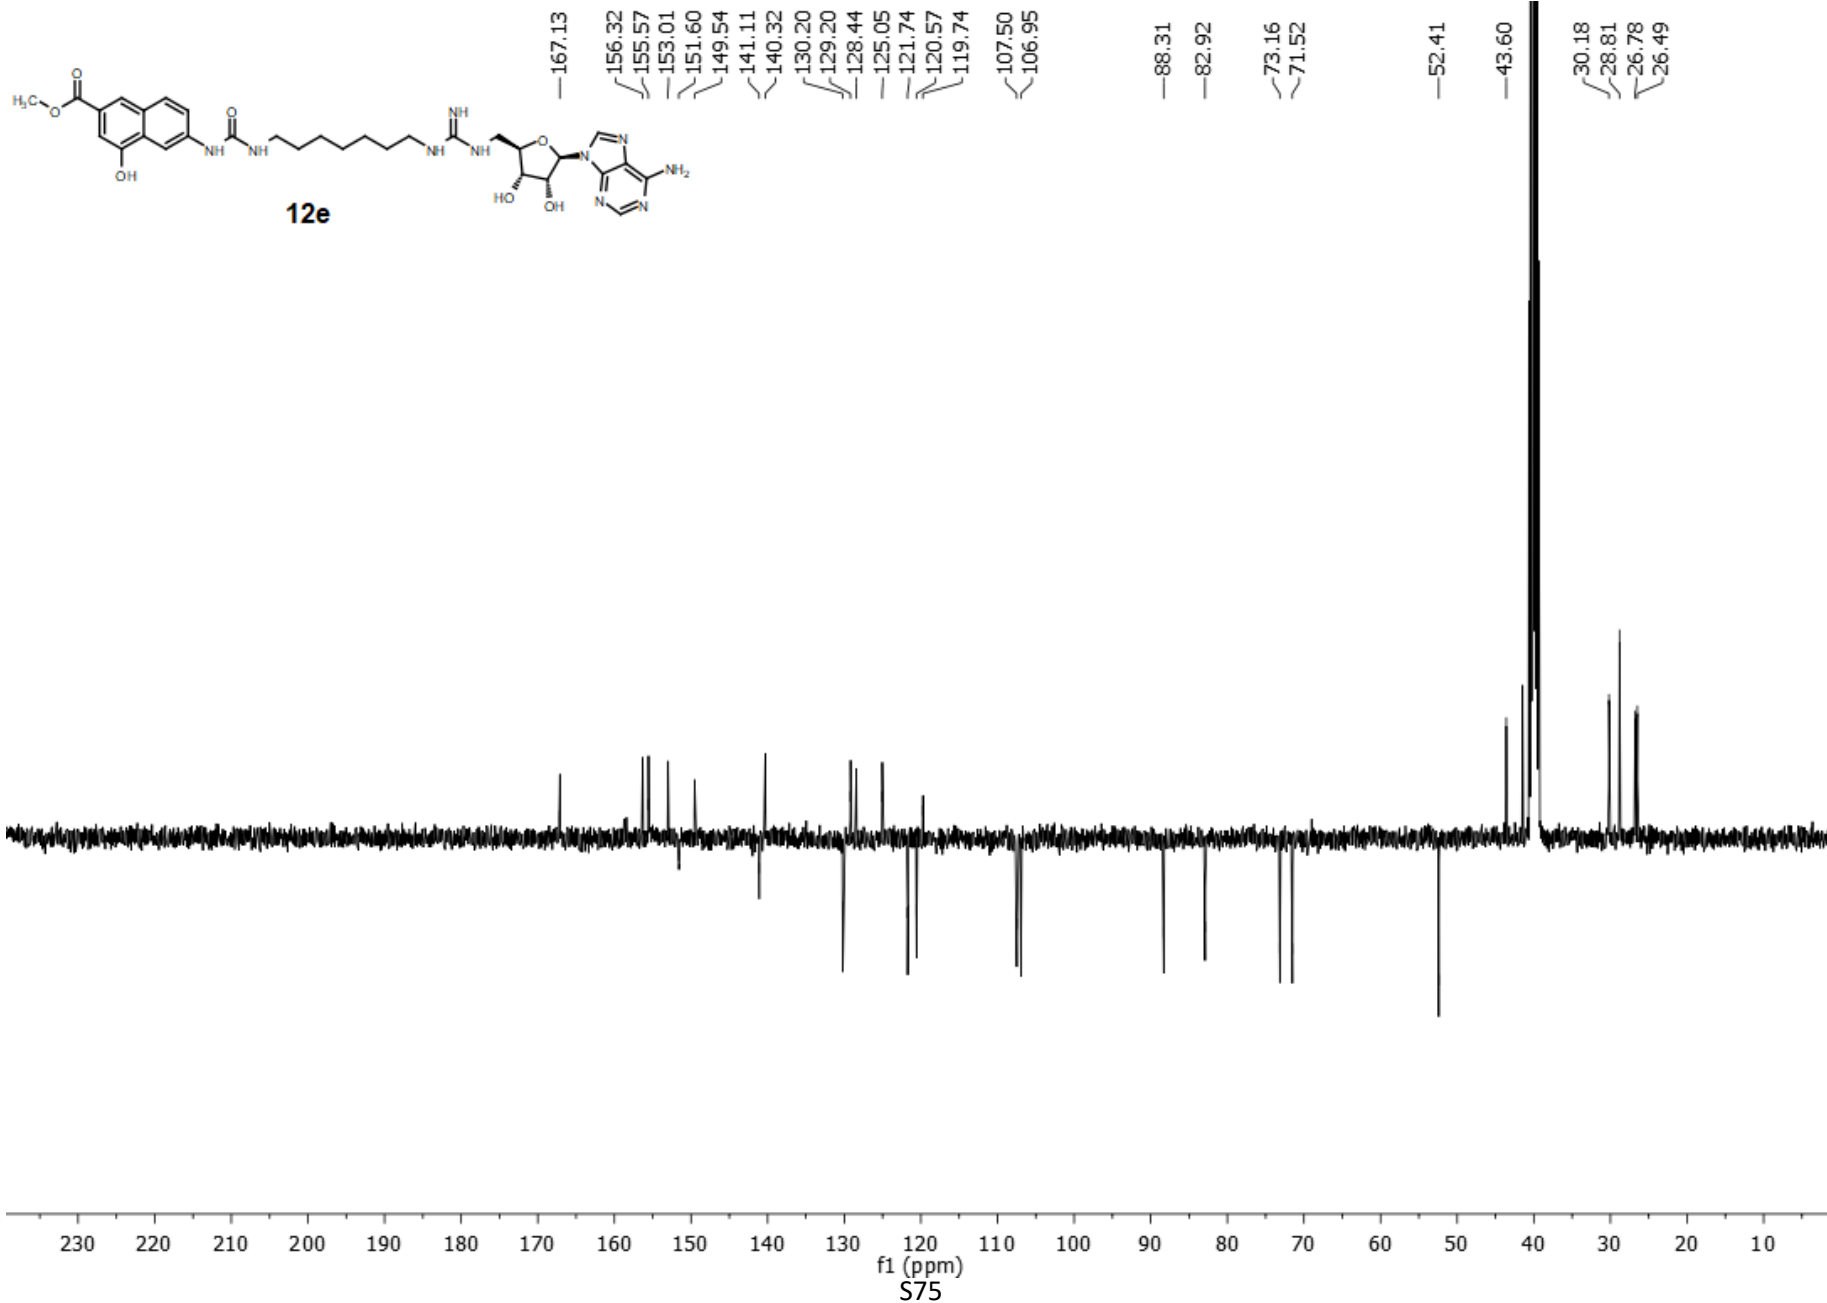

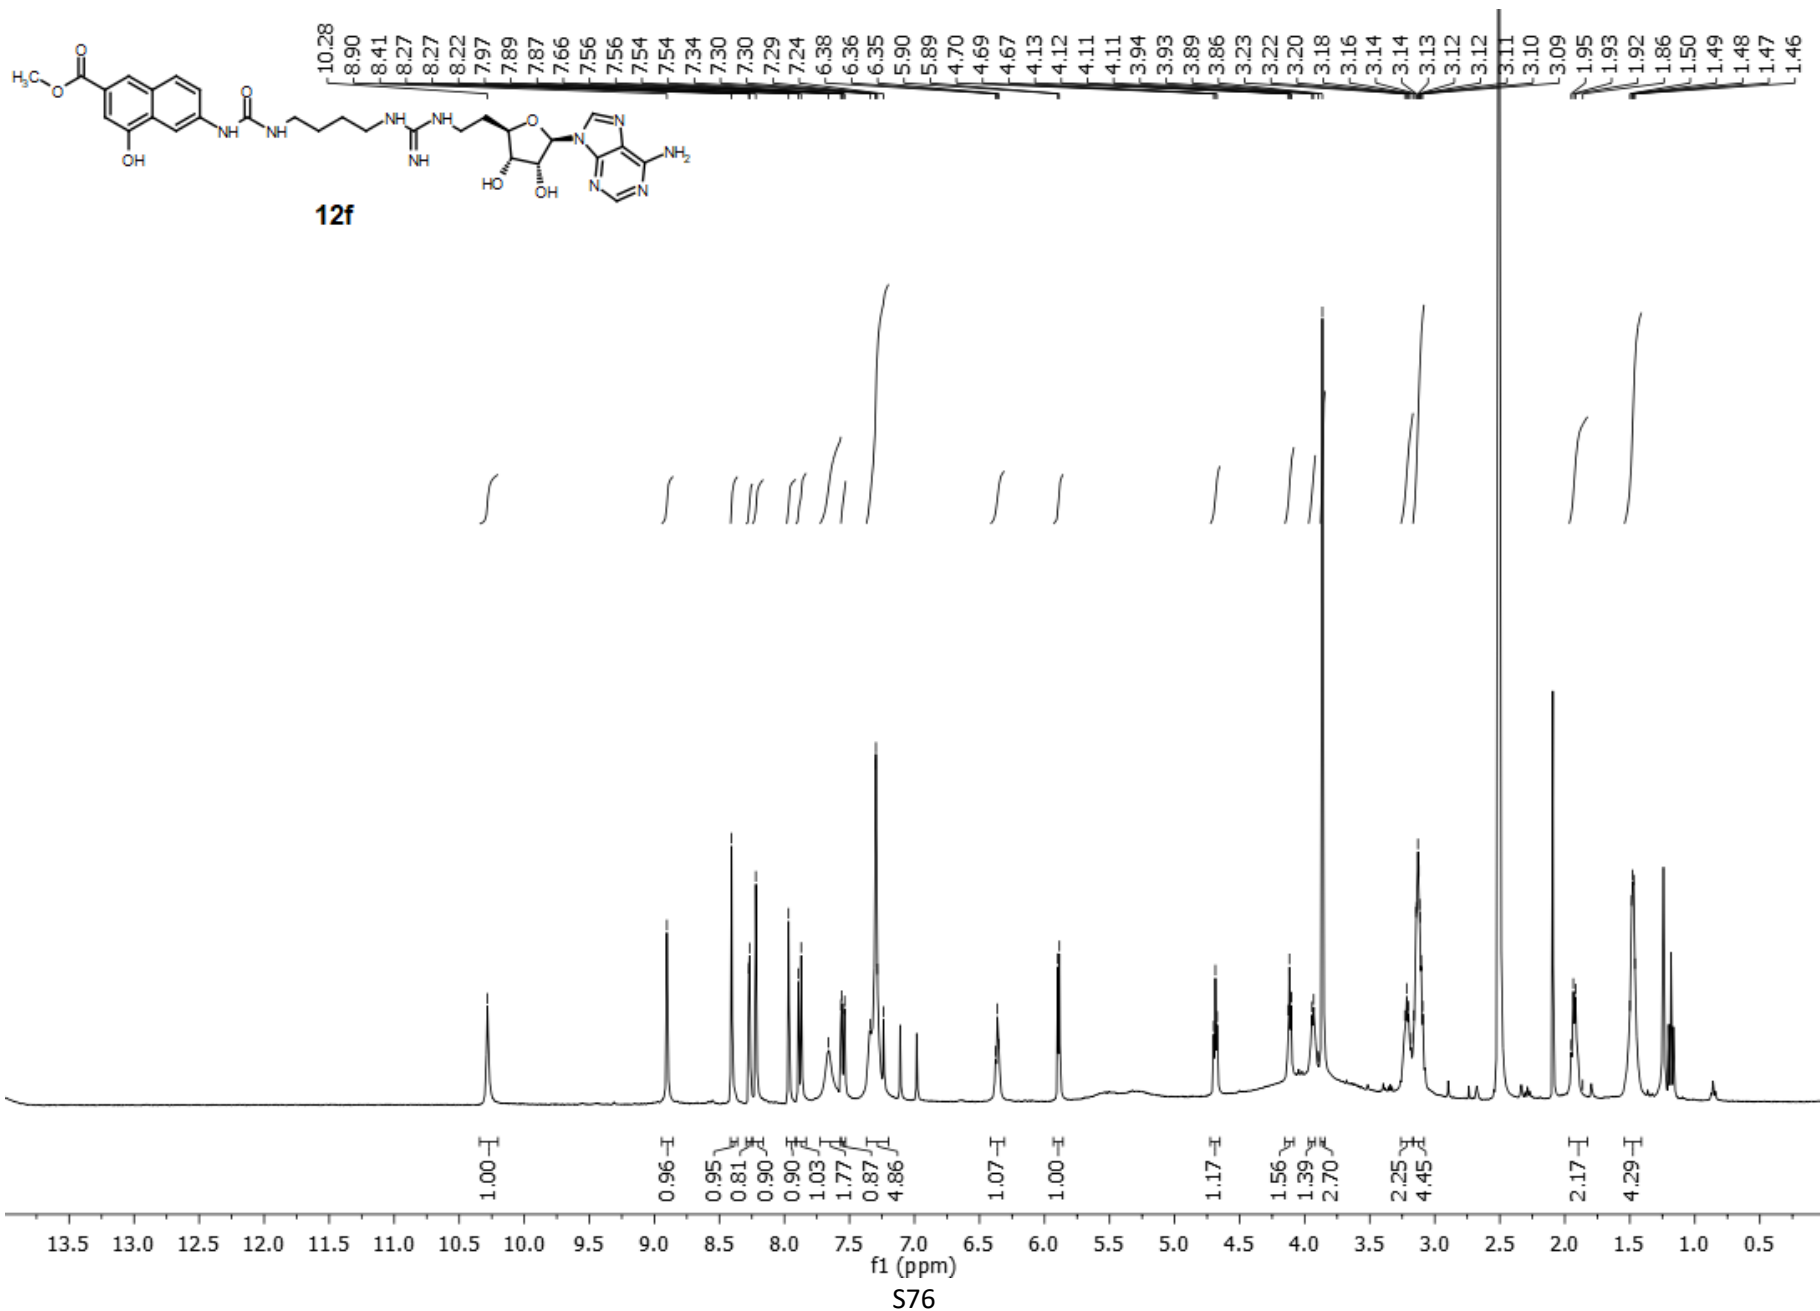



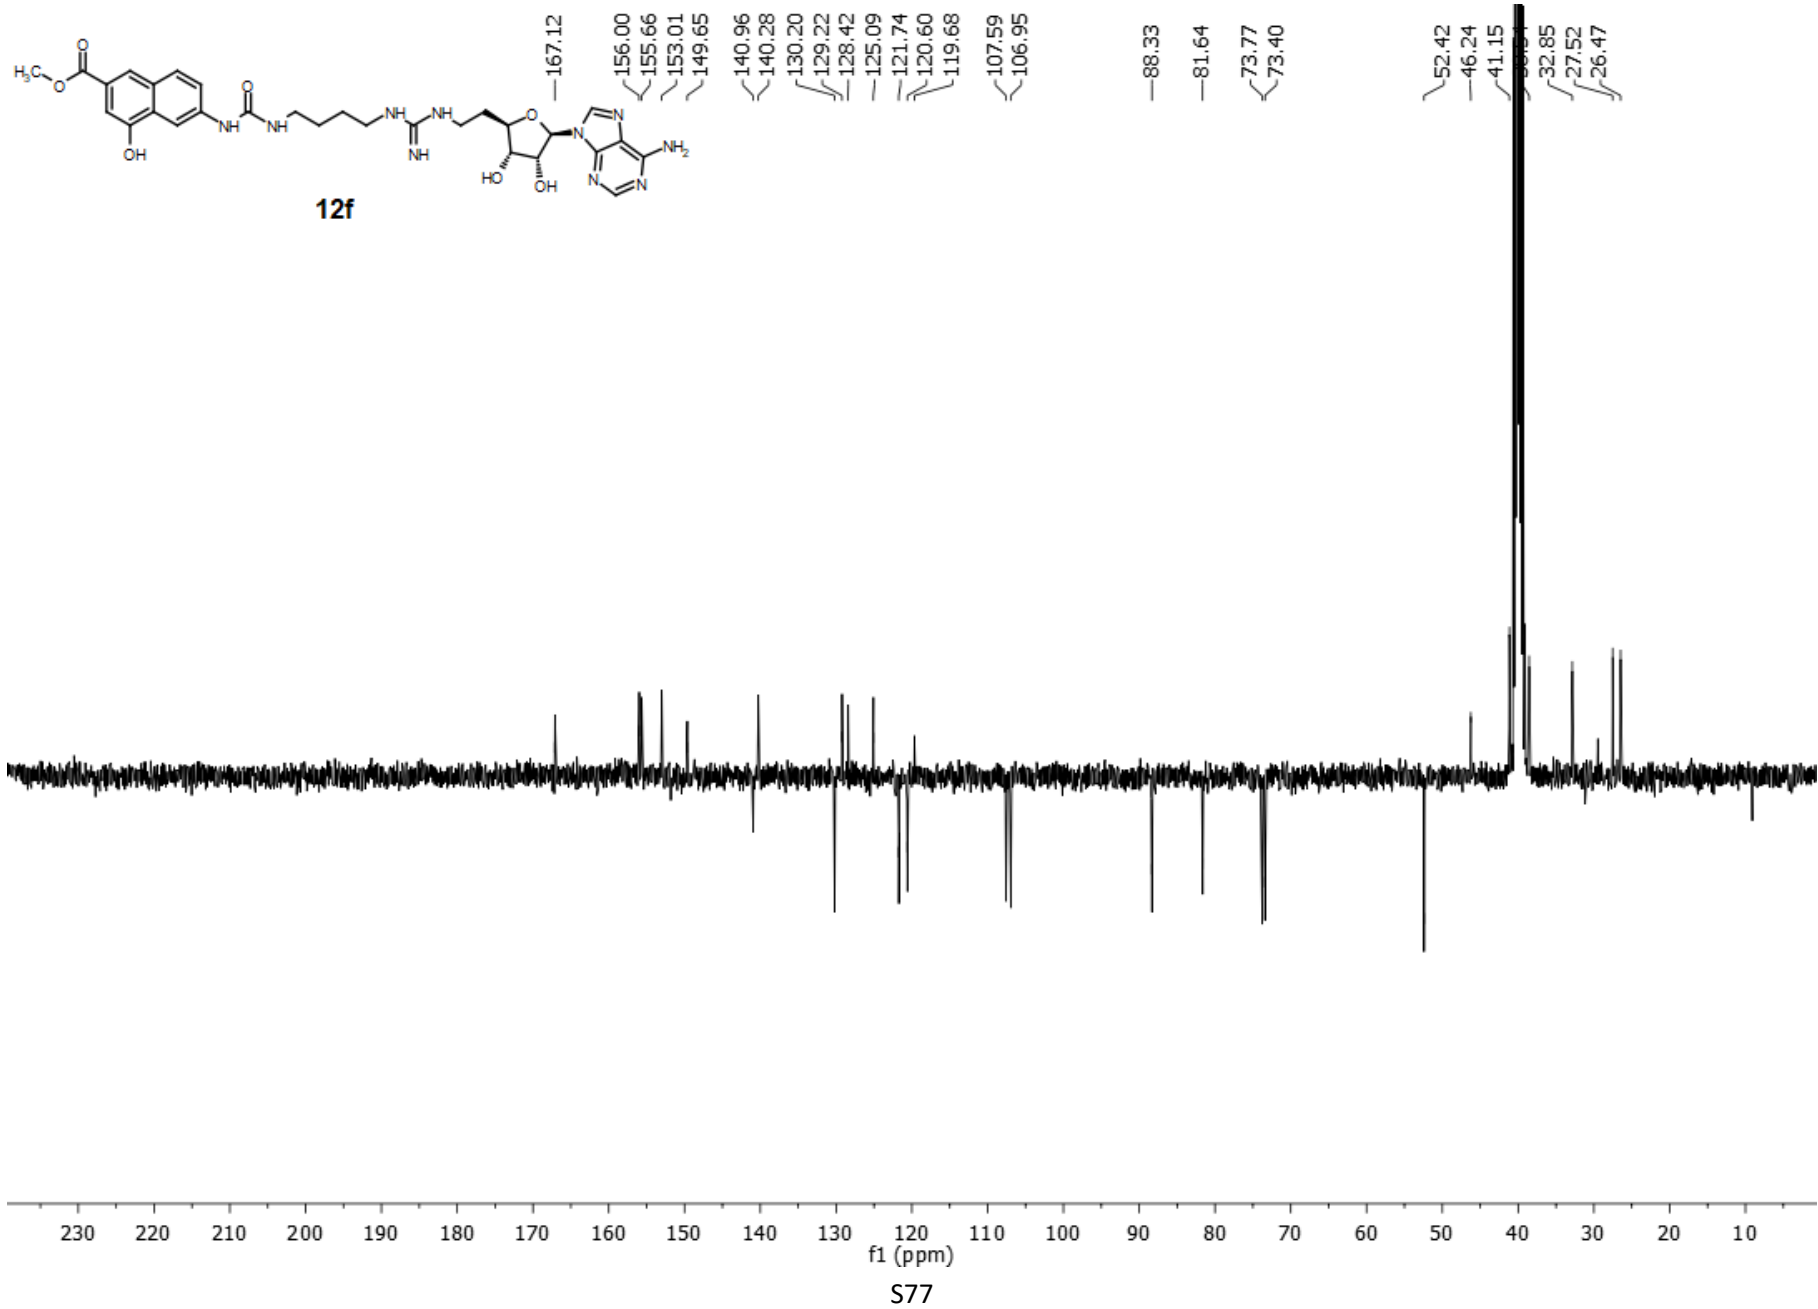

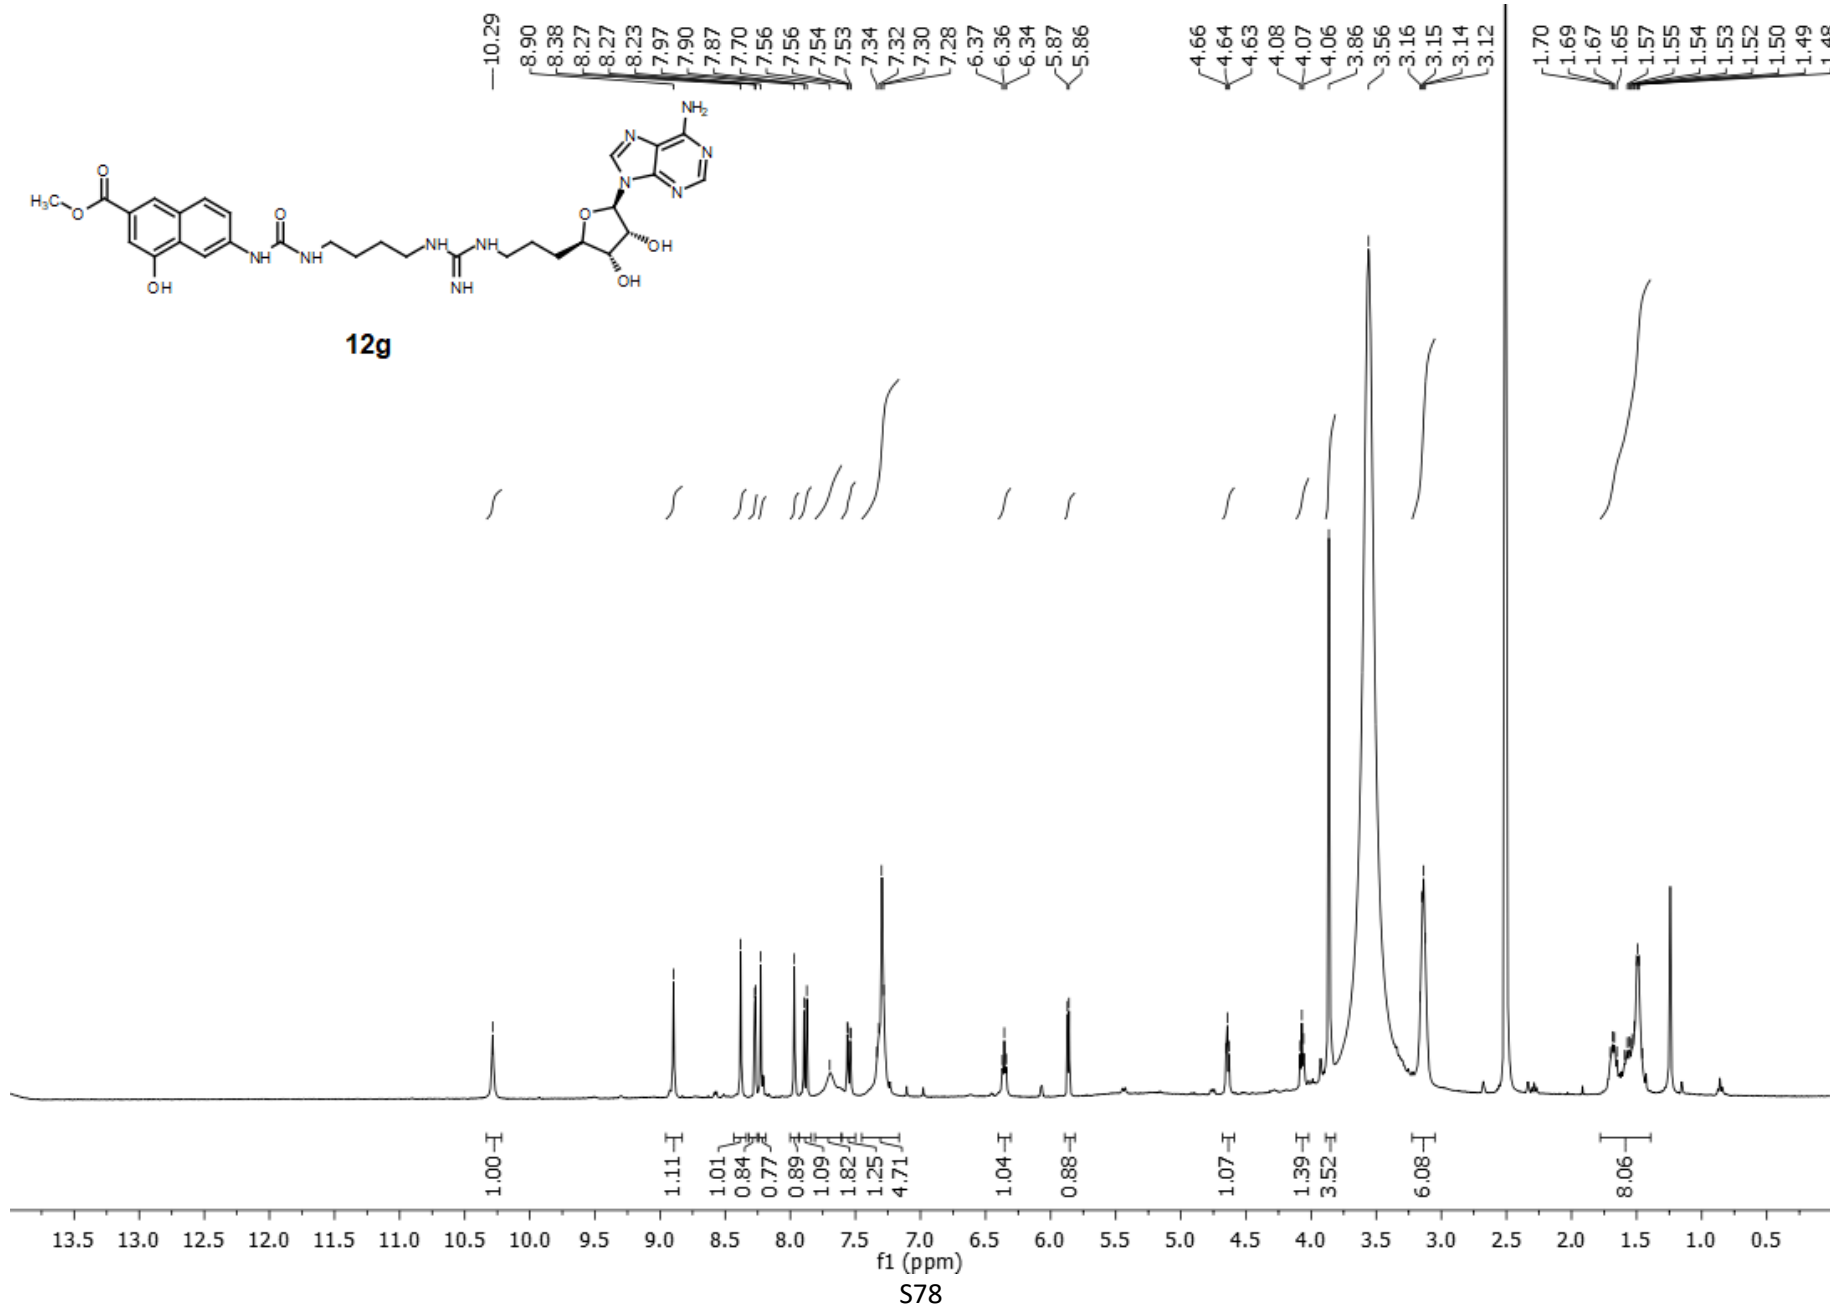

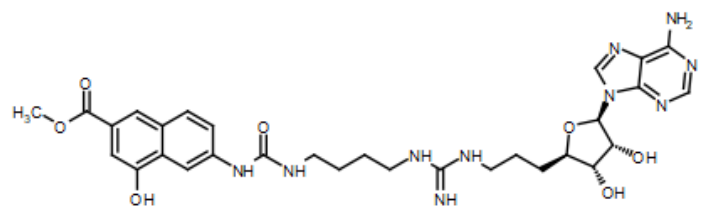

12g

- 167.13
- 155.95
- 155.67
- 153.01
- 149.63
- 140.93
- 140.27
- 130.21
- 129.23
- 128.42
- 125.09
- 121.74
- 120.60
- 107.60
- 106.96
- 88.32
- 83.63
- 73.72
- 73.53
- 52.42
- 41.21
- 41.13
- 39.09
- 30.52
- 27.54
- 26.49
- 25.55

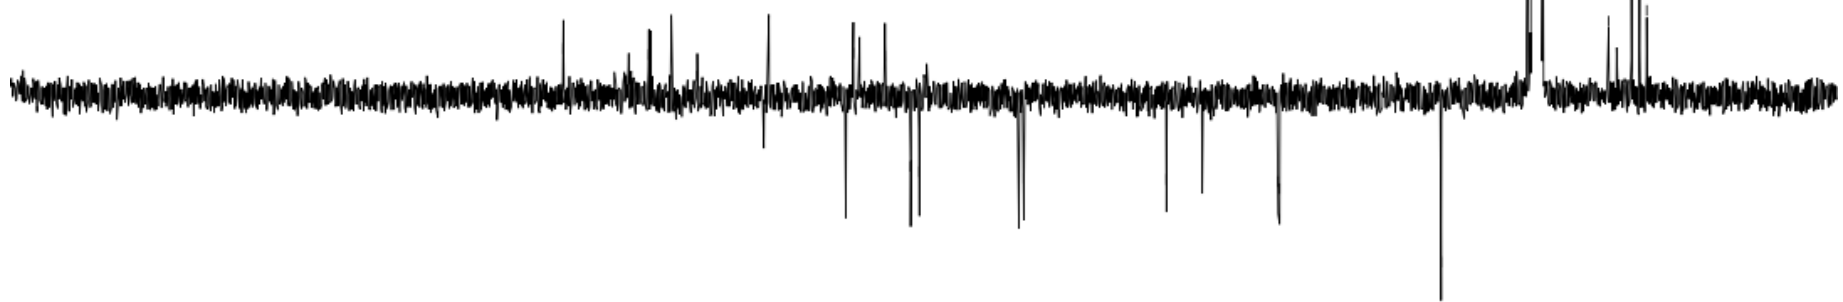

230 220 210 200 190 180 170 160 150 140 130 120 110 100 90 80 70 60 50 40 30 20 10

f1 (ppm)  
S79

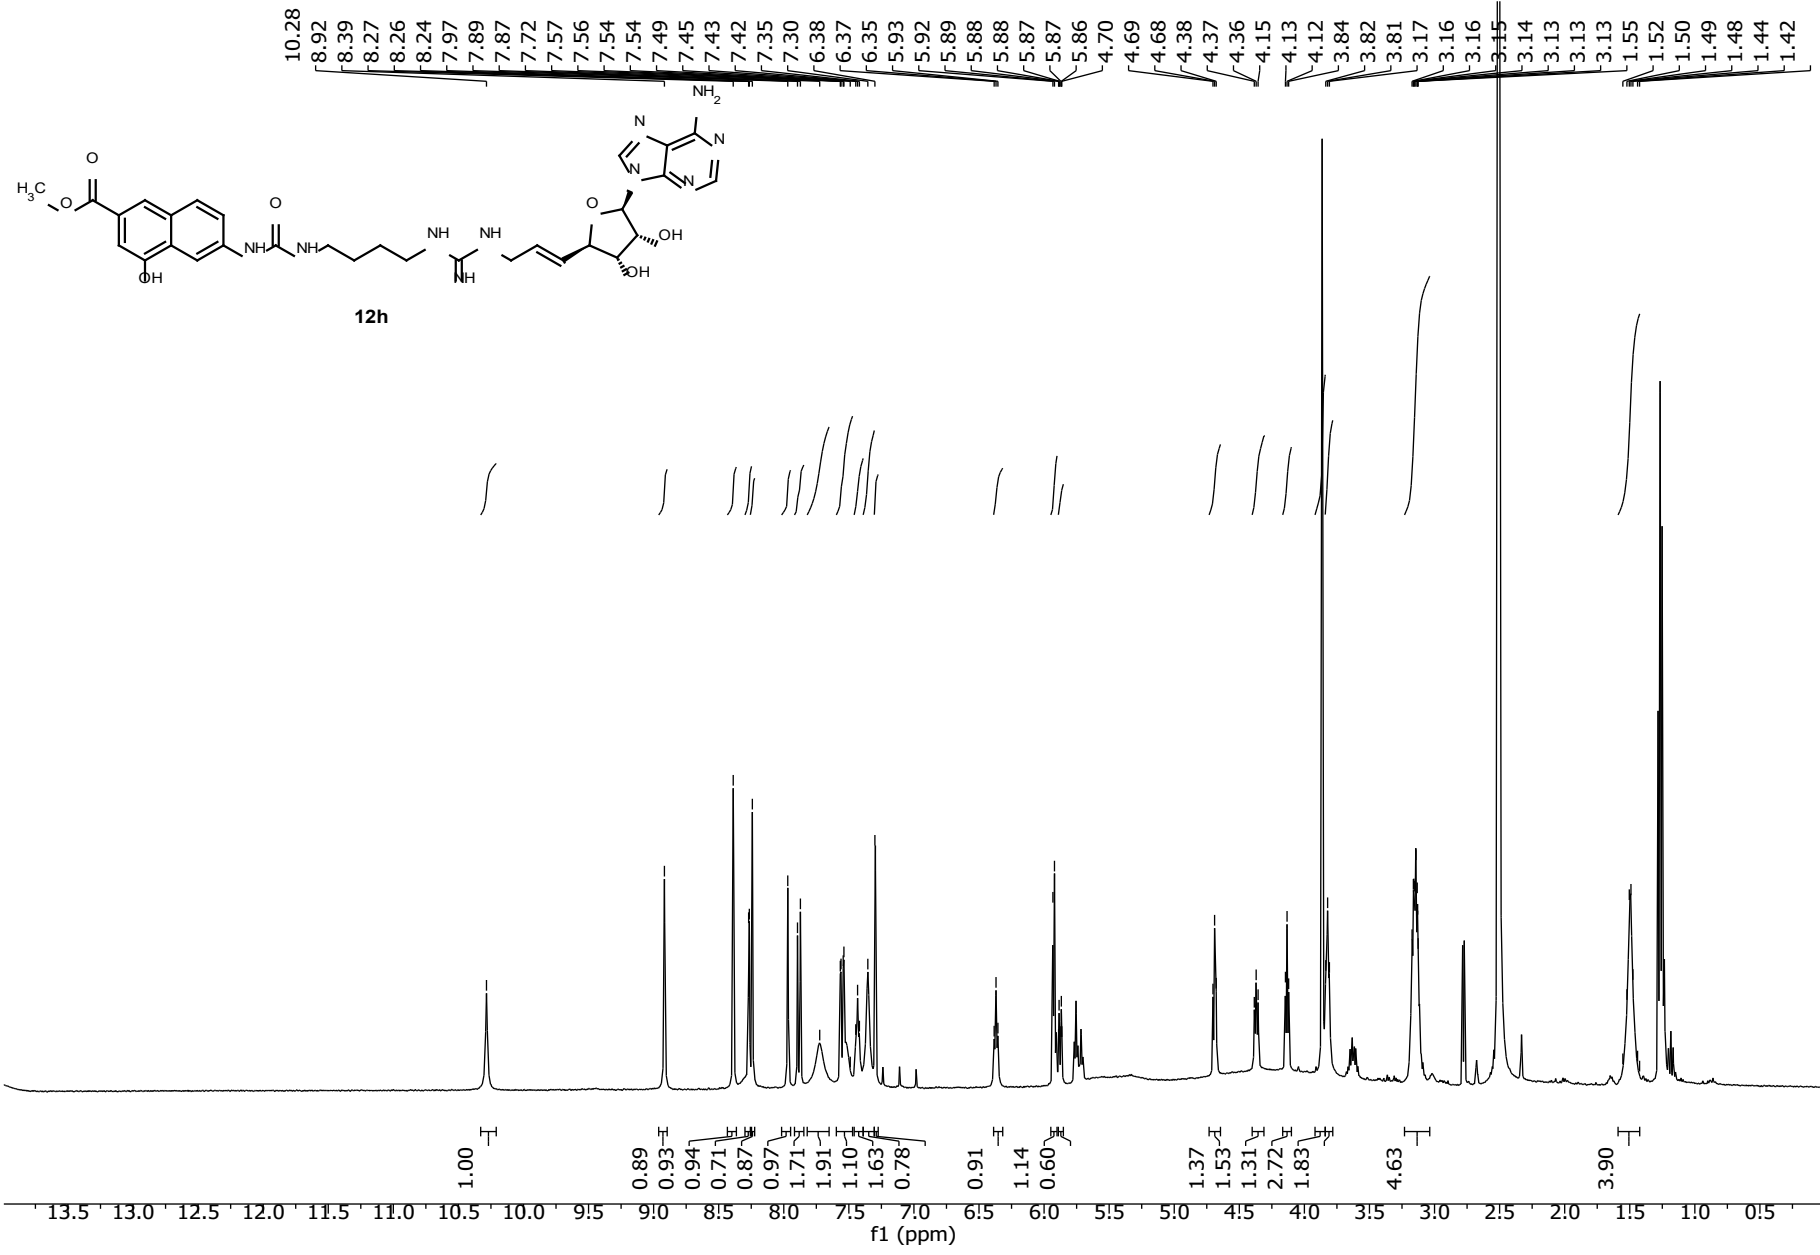

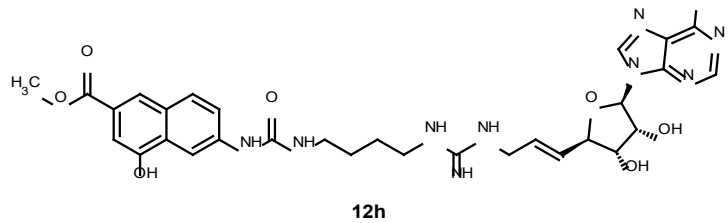

167.13  
 155.94  
 155.68  
 153.01  
 149.63  
 140.97  
 140.27  
 130.48  
 130.21  
 129.23  
 128.38  
 125.09  
 121.74  
 120.60

88.38  
 84.21  
 74.44  
 73.28

54.07  
 52.42  
 44.66  
 42.31  
 41.21

27.52  
 26.47

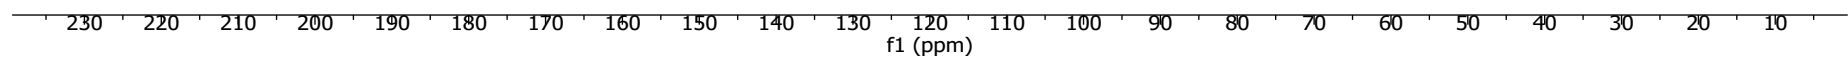

HPLC Traces of compound **12a**

**SHIMADTZU HPLC ANALYSIS REPORT**

Data File Name : EML734.lcd

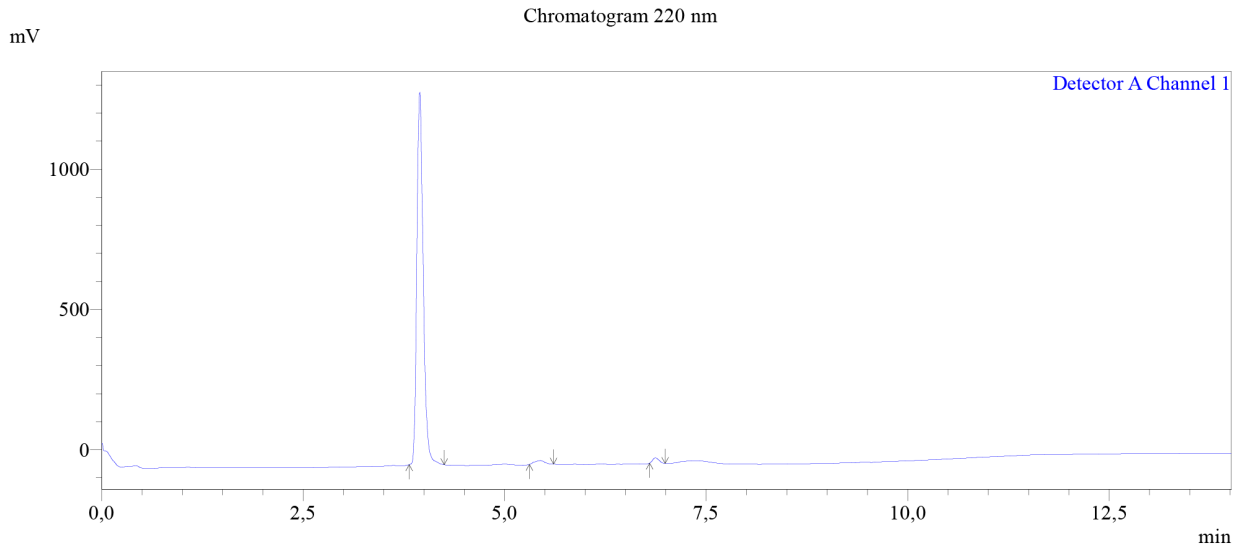

Peak Table

Detector A Channel 1 220nm

| Peak# | Ret. Time | Height  | Area    | Area%   |
|-------|-----------|---------|---------|---------|
| 1     | 3,942     | 1327058 | 7302685 | 97,122  |
| 2     | 5,436     | 13546   | 115682  | 1,539   |
| 3     | 6,867     | 18730   | 100711  | 1,339   |
| Total |           | 1359334 | 7519077 | 100,000 |

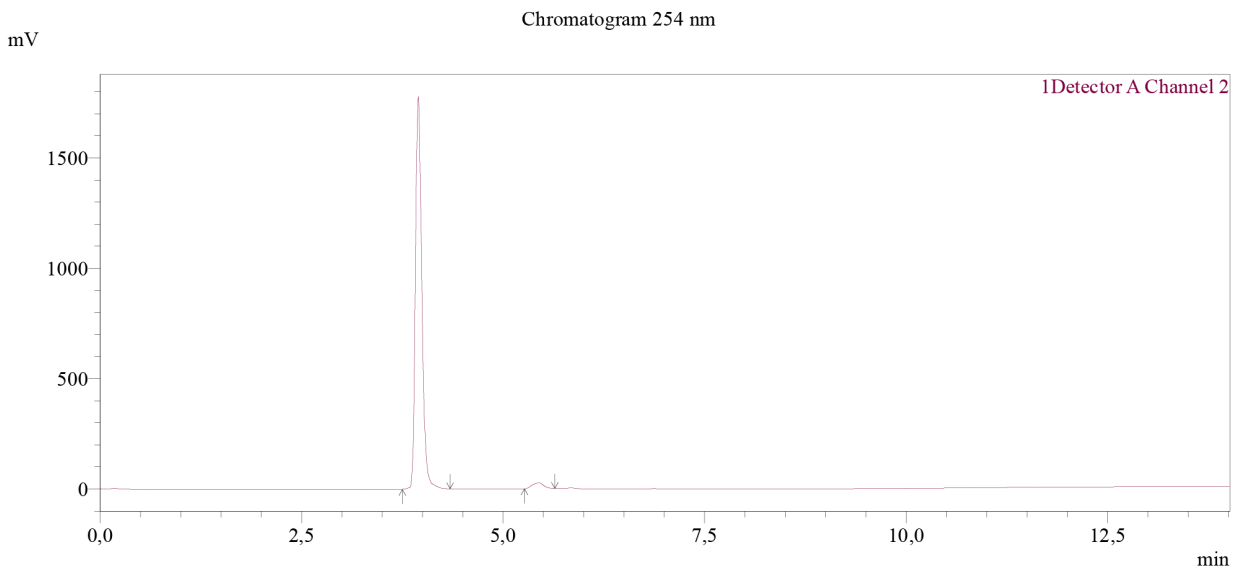

Peak Table

Detector A Channel 2 254nm

| Peak# | Ret. Time | Height  | Area     | Area%   |
|-------|-----------|---------|----------|---------|
| 1     | 3,944     | 1779565 | 9879389  | 97,360  |
| 2     | 5,436     | 26906   | 267928   | 2,640   |
| Total |           | 1806471 | 10147317 | 100,000 |

# HPLC Traces of compound 12b

## SHIMADTZU HPLC ANALYSIS REPORT

Data File Name : EML709.lcd

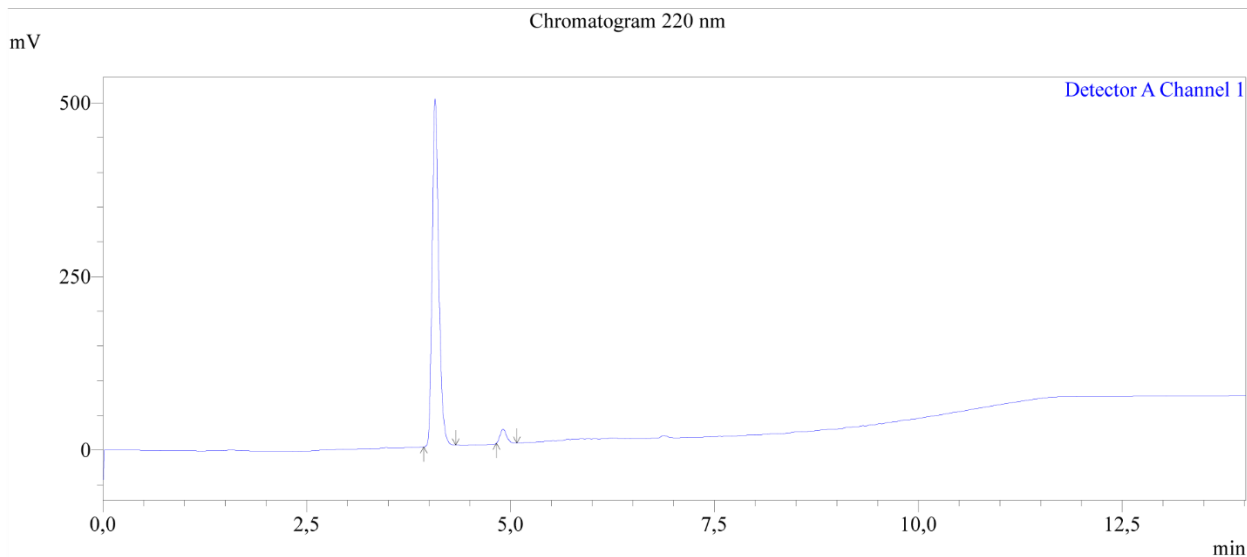

| Peak Table                 |           |        |         |         |
|----------------------------|-----------|--------|---------|---------|
| Detector A Channel 1 220nm |           |        |         |         |
| Peak#                      | Ret. Time | Height | Area    | Area%   |
| 1                          | 4,070     | 500641 | 2798814 | 96,212  |
| 2                          | 4,903     | 20471  | 110182  | 3,788   |
| Total                      |           | 521112 | 2908996 | 100,000 |

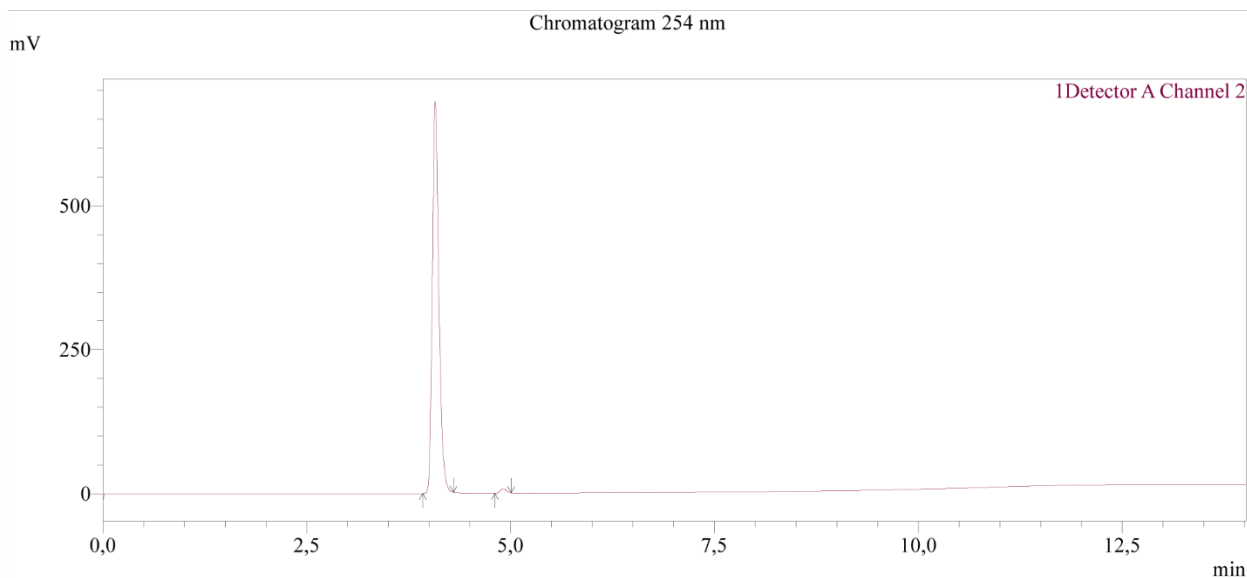

| Peak Table                 |           |        |         |         |
|----------------------------|-----------|--------|---------|---------|
| Detector A Channel 2 254nm |           |        |         |         |
| Peak#                      | Ret. Time | Height | Area    | Area%   |
| 1                          | 4,072     | 680261 | 3785977 | 99,007  |
| 2                          | 4,904     | 7129   | 37989   | 0,993   |
| Total                      |           | 687389 | 3823966 | 100,000 |

HPLC Traces of compound **12c**

**SHIMADTZU HPLC ANALYSIS REPORT**

**Data File Name : EML736.lcd**

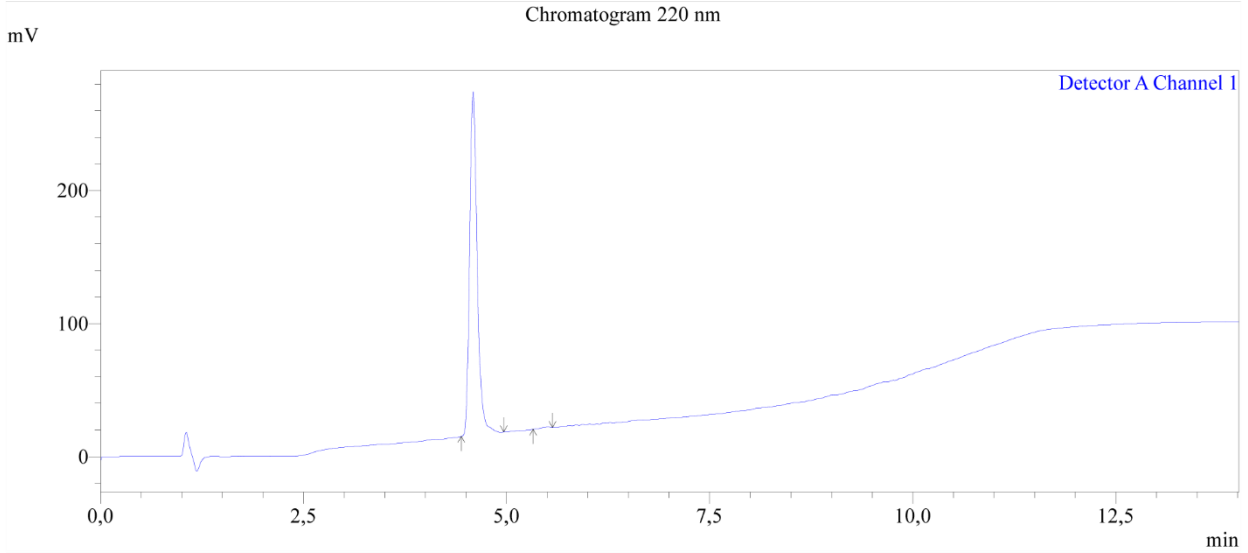

| Peak Table                 |           |        |         |         |
|----------------------------|-----------|--------|---------|---------|
| Detector A Channel 1 220nm |           |        |         |         |
| Peak#                      | Ret. Time | Height | Area    | Area%   |
| 1                          | 4,583     | 257927 | 1676431 | 99,666  |
| 2                          | 5,504     | 827    | 5621    | 0,334   |
| Total                      |           | 258754 | 1682053 | 100,000 |

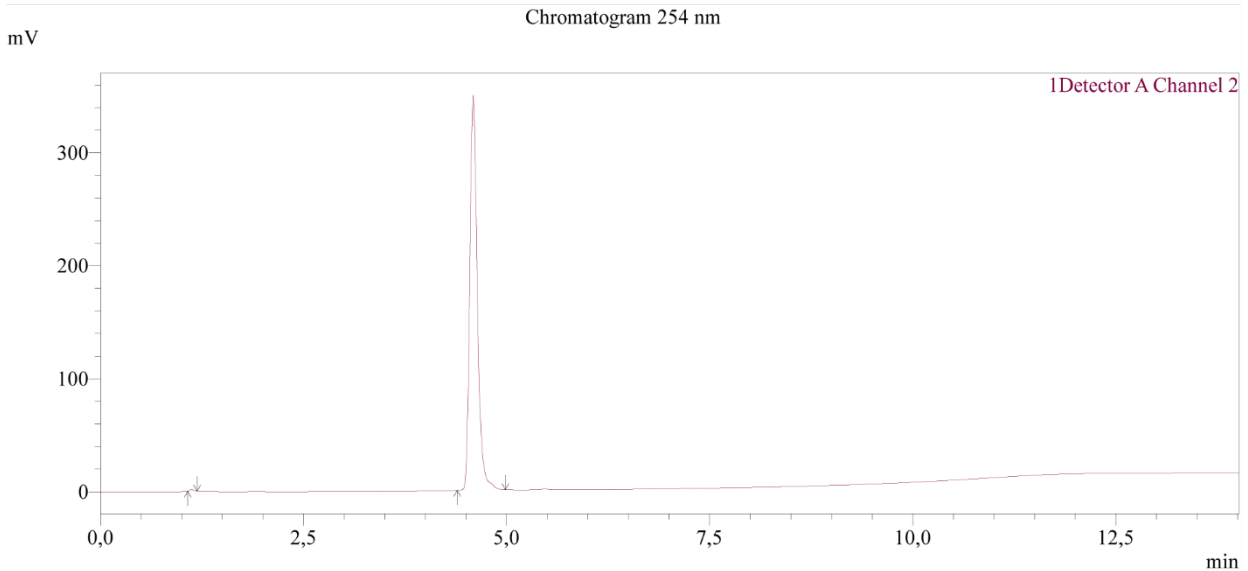

| Peak Table                 |           |        |         |         |
|----------------------------|-----------|--------|---------|---------|
| Detector A Channel 2 254nm |           |        |         |         |
| Peak#                      | Ret. Time | Height | Area    | Area%   |
| 1                          | 1,119     | 1623   | 5681    | 0,250   |
| 2                          | 4,584     | 349363 | 2266847 | 99,750  |
| Total                      |           | 350986 | 2272528 | 100,000 |



# HPLC Traces of compound 12d

## SHIMADTZU HPLC ANALYSIS REPORT

Data File Name : EML978.lcd

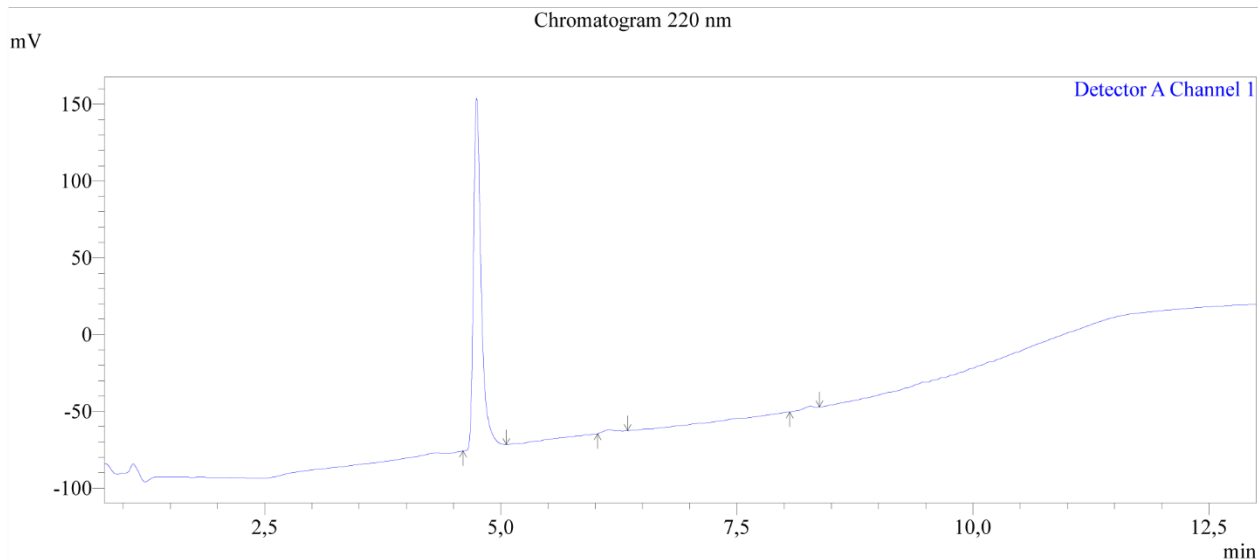

Peak Table

Detector A Channel 1 220nm

| Peak# | Ret. Time | Height | Area    | Area%   |
|-------|-----------|--------|---------|---------|
| 1     | 4,741     | 228384 | 1302258 | 98,004  |
| 2     | 6,144     | 2091   | 15906   | 1,197   |
| 3     | 8,276     | 1545   | 10611   | 0,799   |
| Total |           | 232020 | 1328775 | 100,000 |

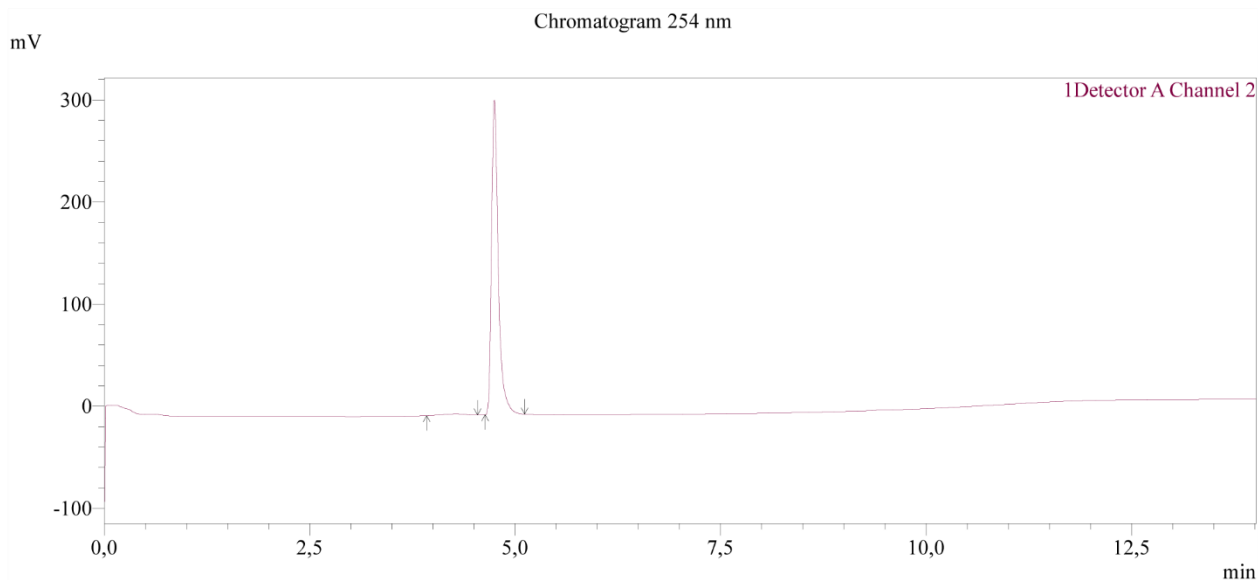

Peak Table

Detector A Channel 2 254nm

| Peak# | Ret. Time | Height | Area    | Area%   |
|-------|-----------|--------|---------|---------|
| 1     | 4,279     | 1394   | 25406   | 1,420   |
| 2     | 4,742     | 307849 | 1764317 | 98,580  |
| Total |           | 309243 | 1789724 | 100,000 |

HPLC Traces of compound **12e**

**SHIMADTZU HPLC ANALYSIS REPORT**

Data File Name : EML979.lcd

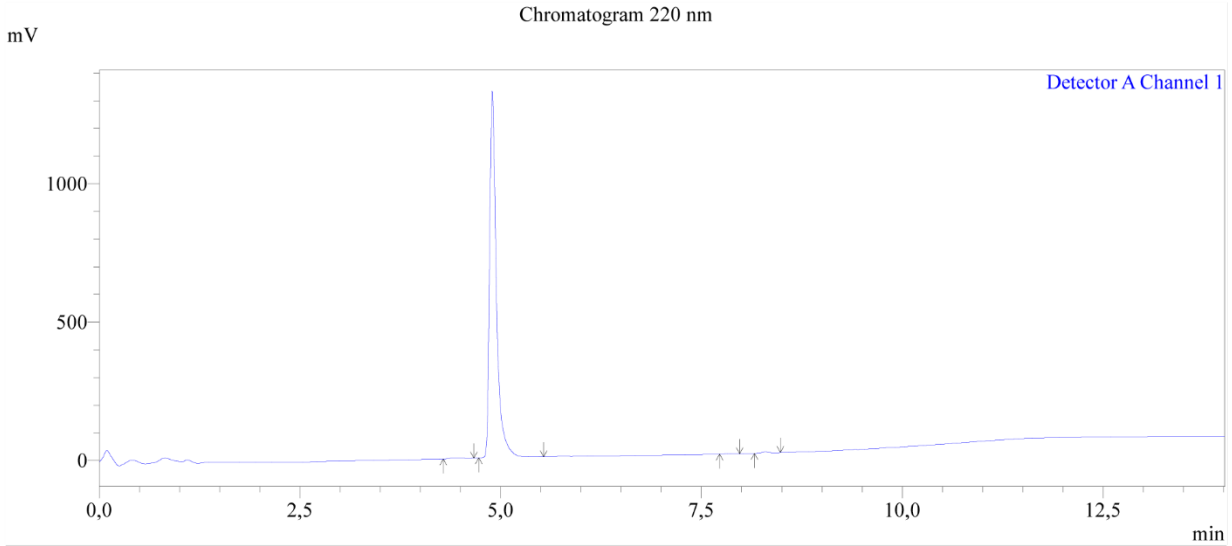

| Peak Table                 |           |         |         |         |
|----------------------------|-----------|---------|---------|---------|
| Detector A Channel 1 220nm |           |         |         |         |
| Peak#                      | Ret. Time | Height  | Area    | Area%   |
| 1                          | 4,498     | 1748    | 24257   | 0,307   |
| 2                          | 4,891     | 1323486 | 7832191 | 99,284  |
| 3                          | 7,837     | 1580    | 10070   | 0,128   |
| 4                          | 8,288     | 4020    | 22141   | 0,281   |
| Total                      |           | 1330834 | 7888660 | 100,000 |

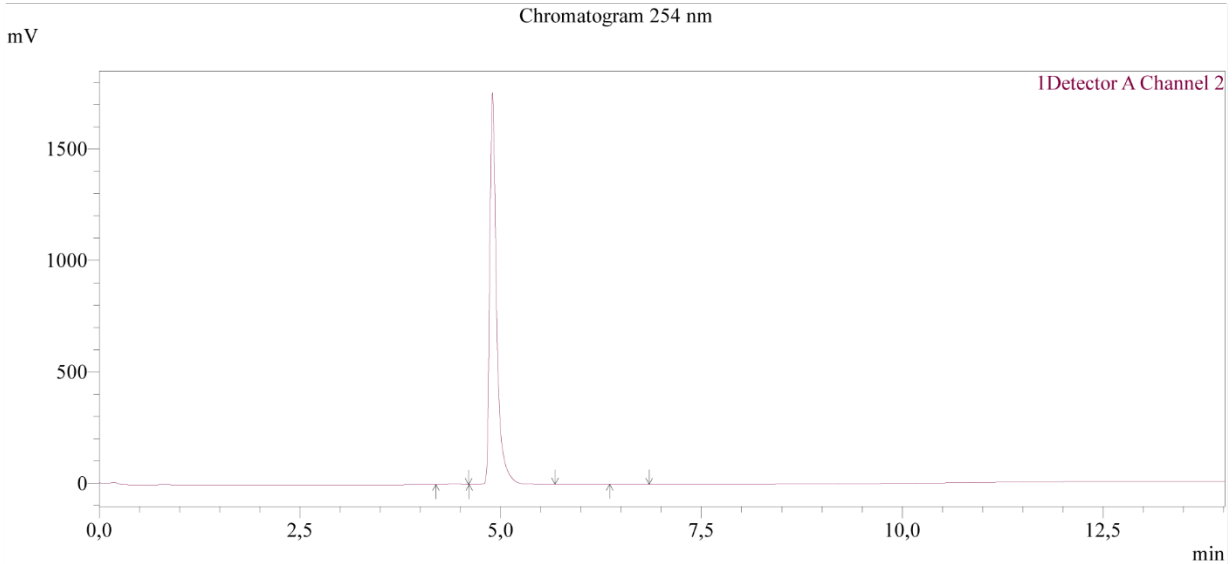

| Peak Table                 |           |         |          |         |
|----------------------------|-----------|---------|----------|---------|
| Detector A Channel 2 254nm |           |         |          |         |
| Peak#                      | Ret. Time | Height  | Area     | Area%   |
| 1                          | 4,388     | 3287    | 32127    | 0,305   |
| 2                          | 4,893     | 1756030 | 10498271 | 99,596  |
| 3                          | 6,666     | 1015    | 10413    | 0,099   |
| Total                      |           | 1760332 | 10540811 | 100,000 |

## HPLC Traces of compound 12f

### SHIMADTZU HPLC ANALYSIS REPORT

Data File Name : EML980.lcd

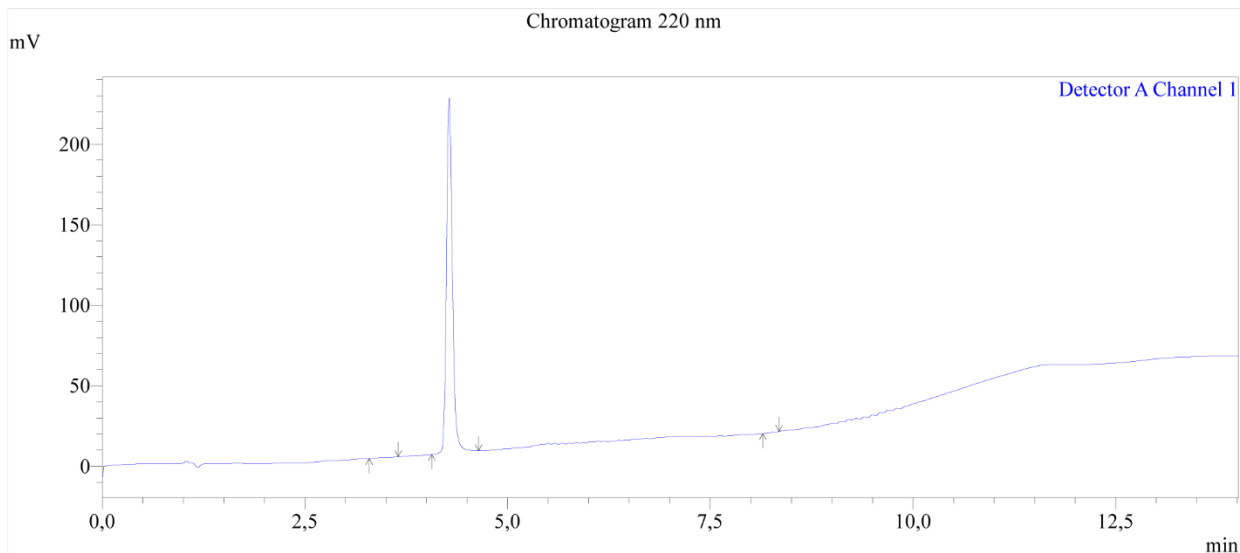

| Peak Table                 |           |        |         |         |
|----------------------------|-----------|--------|---------|---------|
| Detector A Channel 1 220nm |           |        |         |         |
| Peak#                      | Ret. Time | Height | Area    | Area%   |
| 1                          | 3,642     | 6      | 1594    | 0,142   |
| 2                          | 4,275     | 220168 | 1117711 | 99,825  |
| 3                          | 8,342     | -58    | 366     | 0,033   |
| Total                      |           | 220116 | 1119671 | 100,000 |

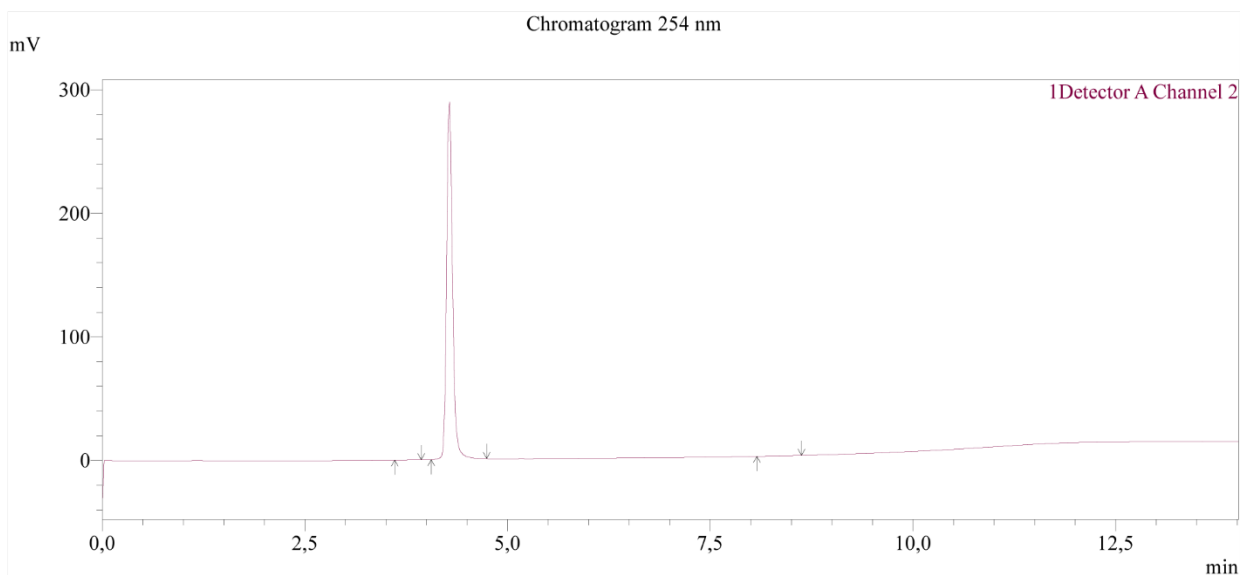

| Peak Table                 |           |        |         |         |
|----------------------------|-----------|--------|---------|---------|
| Detector A Channel 2 254nm |           |        |         |         |
| Peak#                      | Ret. Time | Height | Area    | Area%   |
| 1                          | 3,824     | 100    | 549     | 0,037   |
| 2                          | 4,277     | 289360 | 1478164 | 99,992  |
| 3                          | 8,617     | -1     | -431    | -0,029  |
| Total                      |           | 289458 | 1478281 | 100,000 |

HPLC Traces of compound **12g**

**SHIMADTZU HPLC ANALYSIS REPORT**

Data File Name : EML982.lcd

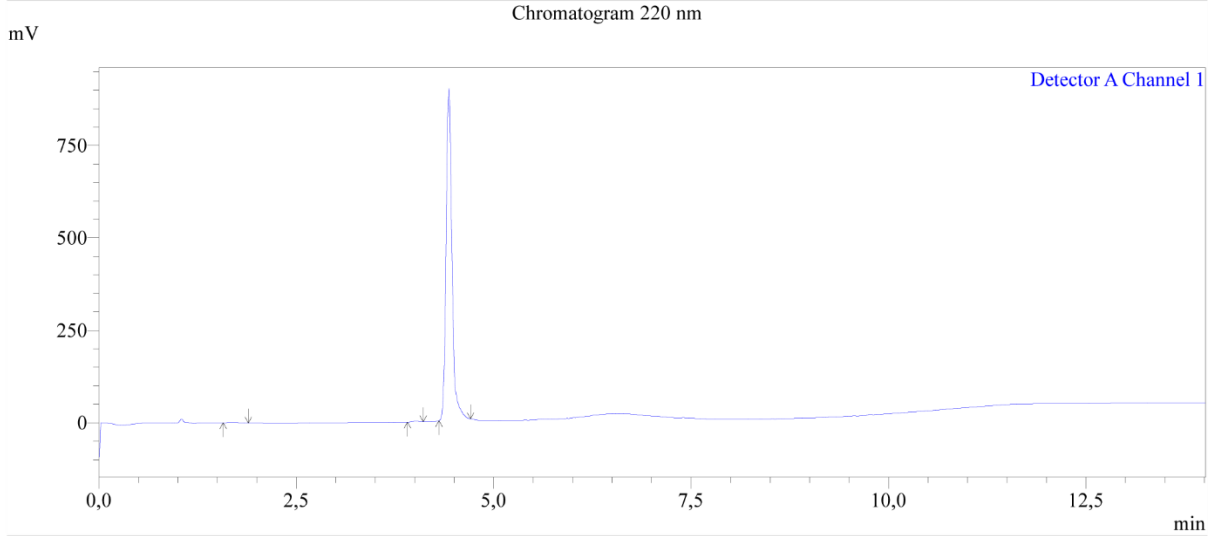

| Peak Table |           |        |         |         |
|------------|-----------|--------|---------|---------|
| Peak#      | Ret. Time | Height | Area    | Area%   |
| 1          | 1,676     | 1329   | 11757   | 0,251   |
| 2          | 4,014     | 1923   | 10936   | 0,234   |
| 3          | 4,428     | 897821 | 4655769 | 99,515  |
| Total      |           | 901073 | 4678462 | 100,000 |

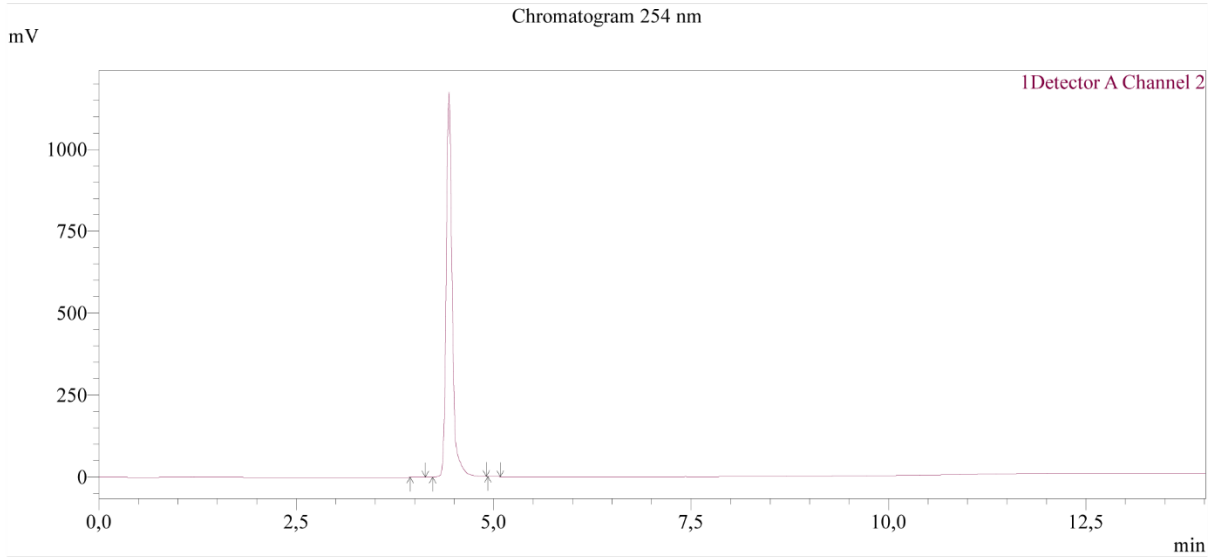

| Peak Table |           |         |         |         |
|------------|-----------|---------|---------|---------|
| Peak#      | Ret. Time | Height  | Area    | Area%   |
| 1          | 4,015     | 360     | 1989    | 0,032   |
| 2          | 4,429     | 1173656 | 6199655 | 99,937  |
| 3          | 4,979     | 401     | 1929    | 0,031   |
| Total      |           | 1174417 | 6203574 | 100,000 |

## HPLC Traces of compound 12h

### SHIMADTZU HPLC ANALYSIS REPORT

**Data File Name : EML981.lcd**

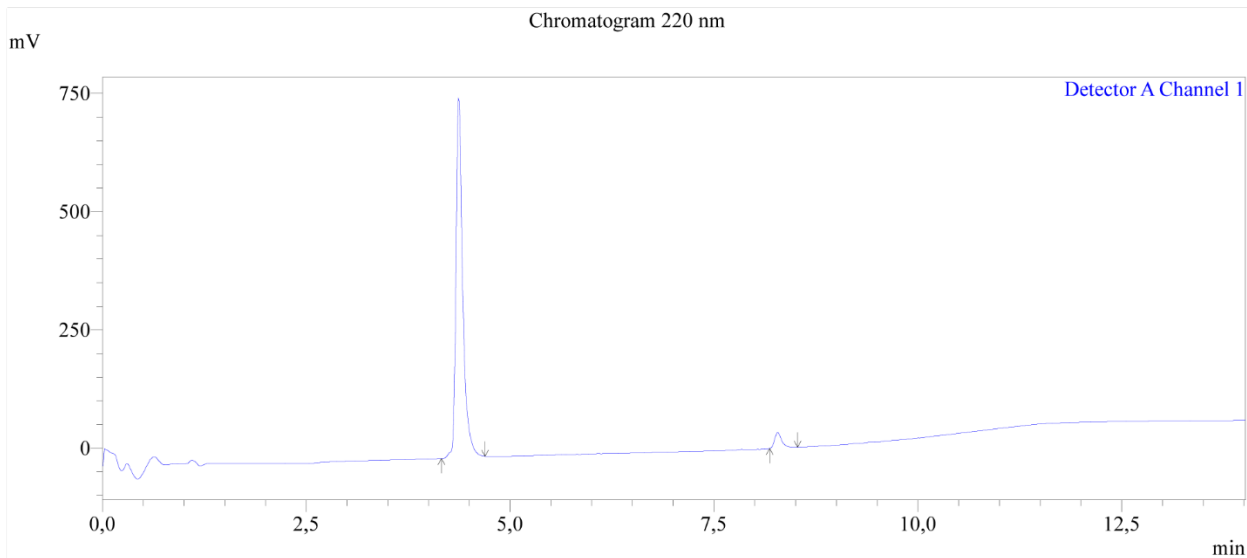

| Peak Table                 |           |        |         |         |
|----------------------------|-----------|--------|---------|---------|
| Detector A Channel 1 220nm |           |        |         |         |
| Peak#                      | Ret. Time | Height | Area    | Area%   |
| 1                          | 4,365     | 759645 | 4397472 | 95,647  |
| 2                          | 8,277     | 33339  | 200112  | 4,353   |
| Total                      |           | 792985 | 4597584 | 100,000 |

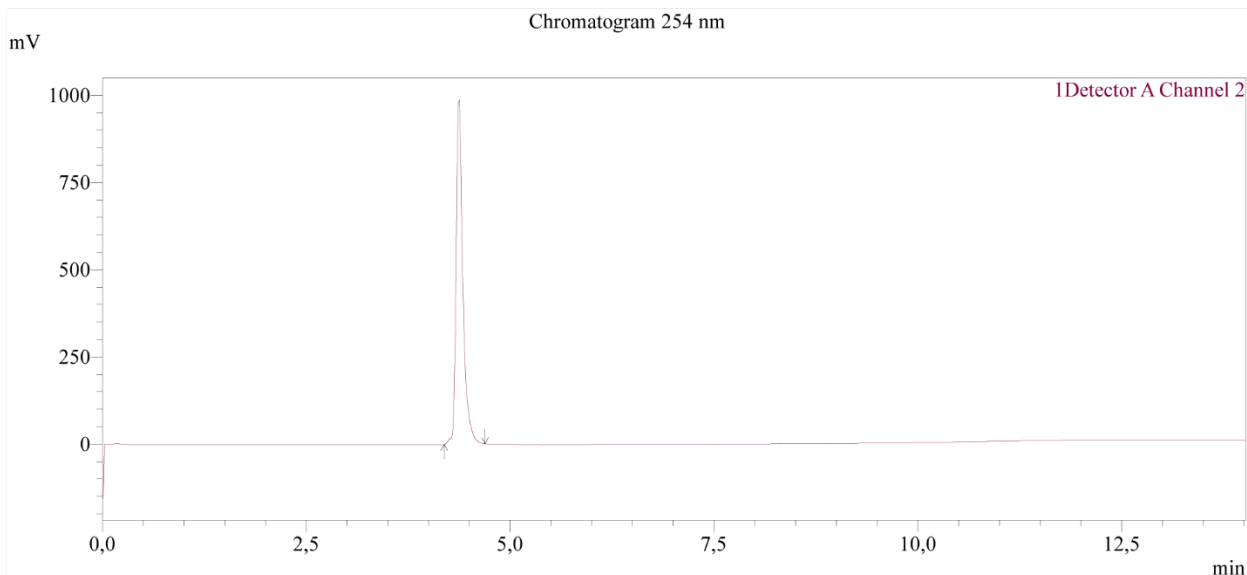

| Peak Table                 |           |        |         |         |
|----------------------------|-----------|--------|---------|---------|
| Detector A Channel 2 254nm |           |        |         |         |
| Peak#                      | Ret. Time | Height | Area    | Area%   |
| 1                          | 4,368     | 986945 | 5700448 | 100,000 |
| Total                      |           | 986945 | 5700448 | 100,000 |
